# Supplementary material for: High-affinity SOAT1 ligands remodeled cholesterol metabolism program to inhibit tumor growth
Source: BMC Med. 2022 Aug 9;20:292. doi: 10.1186/s12916-022-02436-8 (PMC9361549; doi:10.1186/s12916-022-02436-8)
Supplement: Supplementary file 3 — Additional file 3. [file 12916_2022_2436_MOESM3_ESM.xlsx]

## Sheet: Description
Supplementary Table S2: Differentially expressed proteins used to elucidate the mechanism of SOAT1 in HCC after treament with nevanimibe and nilotinib
P-values were corrected by the Benjamini-Hochberg (BH) algorithm and significant calls were made based on an BH adjusted P-value < 0.01
Column header	Explanation
P-value	P-values were calculated by moderated t-statistics
BH adjusted P-value	Benjamini-Hochberg adjusted P-values

## Sheet: Raw data-7307
Accession	Gene name	Description	Coverage	MW [kDa]	Control-1	Control-2	Control-3	Nenanimibe-1	Nenanimibe-2	Nenanimibe-3	Nilotinib-1	Nilotinib-2	Nilotinib-3
P04217	A1BG	Alpha-1B-glycoprotein OS=Homo sapiens GN=A1BG PE=1 SV=3	4.0404	54.2	7.27672e+06	1.37625e+07	2.15801e+07
Q9NQ94	A1CF	APOBEC1 complementation factor OS=Homo sapiens GN=A1CF PE=1 SV=1	54.3771	65.2	5.14833e+08	4.85993e+08	5.63166e+08	3.27139e+08	3.57967e+08	4.04261e+08	4.90477e+08	3.1797e+08	5.4033e+08
P01023	A2M	Alpha-2-macroglobulin OS=Homo sapiens GN=A2M PE=1 SV=2	61.0583	163.2	9.83805e+08	9.67116e+08	1.14184e+09	1.26223e+09	1.07233e+09	1.21327e+09	8.75684e+08	5.6223e+08	9.54636e+08
Q9NRG9	AAAS	Aladin OS=Homo sapiens GN=AAAS PE=1 SV=1	50.1832	59.5	2.62401e+08	2.13127e+08	8.37669e+08	2.75858e+08	2.50479e+08	265913030	2.17379e+08	1.3618e+08	2.74079e+08
Q86V21	AACS	Acetoacetyl-CoA synthetase OS=Homo sapiens GN=AACS PE=1 SV=1	19.1964	75.1		20495255	4.86488e+07		2.54914e+07		4.91627e+07	19644330	3.87714e+07
P22760	AADAC	Arylacetamide deacetylase OS=Homo sapiens GN=AADAC PE=1 SV=4	17.0426	45.7		2.33405e+07	1.29665e+07	4.38467e+07			2.77206e+07	5.19114e+06
Q2M2I8	AAK1	AP2-associated protein kinase 1 OS=Homo sapiens GN=AAK1 PE=1 SV=2	12.7462	93.5	6.0358e+07	5.35285e+07	4.59945e+07	69934017	4.79378e+07	52345531	6.00936e+07	49321110	7.13187e+07
Q9H7C9	AAMDC	UPF0366 protein C11orf67 OS=Homo sapiens GN=C11orf67 PE=1 SV=1	13.1148	13.3								1.04918e+07
Q13685	AAMP	Angio-associated migratory cell protein OS=Homo sapiens GN=AAMP PE=1 SV=2	37.0968	46.7	7.61876e+07	6.445e+07	8.8102e+07	96935534	9.00971e+07	1.03787e+08	91213932		133344430
Q9Y312	AAR2	Uncharacterized protein C20orf4 OS=Homo sapiens GN=C20orf4 PE=1 SV=2	35.9375	43.4	2.35738e+08	2.47292e+08	1.88351e+08	1.9037e+08	2.01711e+08	2.11019e+08	1.98174e+08	1.71184e+08	2.40187e+08
P49588	AARS1	Alanyl-tRNA synthetase, cytoplasmic OS=Homo sapiens GN=AARS PE=1 SV=2	57.8512	106.7	5.47873e+08	4.85734e+08	5.50437e+08	6.41762e+08	6.32544e+08	6.55087e+08	5.74582e+08	4.37291e+08	5.62415e+08
Q5JTZ9	AARS2	Probable alanyl-tRNA synthetase, mitochondrial OS=Homo sapiens GN=AARS2 PE=1 SV=1	38.7817	107.3	1.55342e+08	1.57287e+08	1.66139e+08	1.53739e+08	1.31631e+08	1.37732e+08	1.39467e+08	8.50969e+07	1.47054e+08
Q9BTE6	AARSD1	Alanyl-tRNA editing protein Aarsd1 OS=Homo sapiens GN=AARSD1 PE=1 SV=2	12.6214	45.5	46572933	49984704	62410180	56986826	50819173	5.01788e+07	5.22449e+07	2.56507e+07	4.68775e+07
Q9NRN7	AASDHPPT	L-aminoadipate-semialdehyde dehydrogenase-phosphopantetheinyl transferase OS=Homo sapiens GN=AASDHPPT PE=1 SV=2	39.8058	35.8	6.01465e+07	66019153	9.31482e+07	1.24661e+08	102573228	1.1631e+08	1.03411e+08	3.50177e+07	8.66621e+07
Q9UDR5	AASS	Alpha-aminoadipic semialdehyde synthase, mitochondrial OS=Homo sapiens GN=AASS PE=1 SV=1	14.1469	102.1	4.03639e+07	2.93764e+07	4.14294e+07	2.49707e+07	2.38556e+07	2.921e+07	2.298e+07	1.55769e+07	3.95032e+07
Q9NY61	AATF	Protein AATF OS=Homo sapiens GN=AATF PE=1 SV=1	40.7143	63.1	4.51391e+08	424517448	4.72504e+08	3.91261e+08	3.78159e+08	4.13705e+08	3.65826e+08	2.73284e+08	4.18841e+08
P80404	ABAT	4-aminobutyrate aminotransferase, mitochondrial OS=Homo sapiens GN=ABAT PE=1 SV=3	73.8	56.4	1.67217e+09	1576826974	2.02971e+09	1.6525e+09	1.63899e+09	1.91789e+09	1.63565e+09	9.55732e+08	1.77695e+09
O95477	ABCA1	Phospholipid-transporting ATPase OS=Homo sapiens GN=ABCA1 PE=1 SV=2	37.1653	254.3	3.81455e+08	3.66607e+08	4.28403e+08	1.41565e+08	1.89373e+08	1.94048e+08	1.3382e+08	1.40376e+08	1.48286e+08
O95477	ABCA1	ATP-binding cassette sub-family A member 1 OS=Homo sapiens GN=ABCA1 PE=1 SV=2	5.57276	254.1	8.50232e+06	1.82019e+07	2.07088e+07		4.44022e+07	1.12914e+07	7.84054e+06	6.91766e+06	4.16961e+07
Q86UQ4	ABCA13	ATP-binding cassette sub-family A member 13 OS=Homo sapiens GN=ABCA13 PE=2 SV=2	0.632661	575.9	1.33472e+07	1.36298e+07	2.10239e+07	5.46128e+06	9.79662e+06			6.23193e+06	7.20669e+06
Q9BZC7	ABCA2	ATP-binding cassette sub-family A member 2 OS=Homo sapiens GN=ABCA2 PE=1 SV=3	1.02669	269.7			74678005
P08183	ABCB1	Multidrug resistance protein 1 OS=Homo sapiens GN=ABCB1 PE=1 SV=3	34.0625	141.4	3.31529e+08	3.37292e+08	3.91031e+08	4.84538e+08	4.06646e+08	4.26714e+08	3.46004e+08	2.77049e+08	3.92907e+08
Q9NRK6	ABCB10	ATP-binding cassette sub-family B member 10, mitochondrial OS=Homo sapiens GN=ABCB10 PE=1 SV=2	23.7127	79.1	6.58651e+07	9.30236e+07	1.08141e+08	5.66556e+07	6.50976e+07	7.15659e+07	9.51508e+07	5.57592e+07	7.04587e+07
O95342	ABCB11	Bile salt export pump OS=Homo sapiens GN=ABCB11 PE=1 SV=2	1.2869	146.3	391171635	3.69731e+08	4.51263e+08	427080229	4.24602e+08	4.5656e+08	418777478	2.17412e+08	410033083
Q9NP58	ABCB6	ATP-binding cassette sub-family B member 6, mitochondrial OS=Homo sapiens GN=ABCB6 PE=1 SV=1	32.0665	93.8	2.38201e+08	224169139	2.33274e+08	239303076	2.45082e+08	2.50382e+08	1.75043e+08	1.06192e+08	2.27657e+08
O75027	ABCB7	ATP-binding cassette sub-family B member 7, mitochondrial OS=Homo sapiens GN=ABCB7 PE=1 SV=2	35.7713	82.6	194414553	1.64274e+08	2.0345e+08	2.06594e+08	1.76323e+08	1.84748e+08	1.86906e+08	1.07972e+08	1.63411e+08
Q9NUT2	ABCB8	ATP-binding cassette sub-family B member 8, mitochondrial OS=Homo sapiens GN=ABCB8 PE=1 SV=3	22.585	79.9	1.00957e+08	102527982	1.09873e+08	9.3157e+07	1.10534e+08	1.08507e+08	83773025	5.52258e+07	8.38074e+07
Q5T3U5	ABCC10	Multidrug resistance-associated protein 7 OS=Homo sapiens GN=ABCC10 PE=1 SV=1	1.13941	161.5
Q92887	ABCC2	Canalicular multispecific organic anion transporter 1 OS=Homo sapiens GN=ABCC2 PE=1 SV=2	33.7217	174.1	4.49593e+08	3.98797e+08	5.25744e+08	5.82038e+08	4.15783e+08	506394977	3.99665e+08	2.24738e+08	4.83944e+08
O15438	ABCC3	Canalicular multispecific organic anion transporter 2 OS=Homo sapiens GN=ABCC3 PE=2 SV=3	18.664	169.2	9.68785e+07	8.41523e+07	9.78313e+07	7.39246e+07	4.8706e+07	8.30457e+07	9.38124e+07	6.14686e+07	8.28915e+07
O15439	ABCC4	Multidrug resistance-associated protein 4 OS=Homo sapiens GN=ABCC4 PE=1 SV=3	14.566	149.4	1.35897e+07	1.32883e+07	19902270	1.62142e+07	1.5708e+07	1.9136e+07	1.19251e+07	2.32798e+07	7.79353e+06
O15440	ABCC5	Multidrug resistance-associated protein 5 OS=Homo sapiens GN=ABCC5 PE=1 SV=2	8.48991	160.6		7.7976e+06		4.68654e+07	3.08871e+06		55381012
O95255	ABCC6	Multidrug resistance-associated protein 6 OS=Homo sapiens GN=ABCC6 PE=1 SV=2	7.45176	164.8	1.25474e+07	1.28322e+07	2.35441e+07			1.23825e+07	9.98573e+06	5.98434e+06	8.69865e+06
P33897	ABCD1	ATP-binding cassette sub-family D member 1 OS=Homo sapiens GN=ABCD1 PE=1 SV=2	44.2953	82.9	2.85745e+08	2.88573e+08	3.37898e+08	242751965	2.38727e+08	2.22642e+08	2.24538e+08	1.57356e+08	229116497
Q9UBJ2	ABCD2	ATP-binding cassette sub-family D member 2 OS=Homo sapiens GN=ABCD2 PE=1 SV=1	5.40541	83.2									8.67007e+07
P28288	ABCD3	ATP-binding cassette sub-family D member 3 OS=Homo sapiens GN=ABCD3 PE=1 SV=1	43.7026	75.4	1.8944e+09	1.74313e+09	2.02249e+09	1843948100	1.84704e+09	2.12994e+09	1.7949e+09	1069039520	1.89969e+09
O14678	ABCD4	ATP-binding cassette sub-family D member 4 OS=Homo sapiens GN=ABCD4 PE=2 SV=1	3.46535	68.6
P61221	ABCE1	ATP-binding cassette sub-family E member 1 OS=Homo sapiens GN=ABCE1 PE=1 SV=1	43.7396	67.3	6.27169e+08	5.84874e+08	6.62413e+08	784973383	6.59902e+08	7.11737e+08	6.05308e+08	3.21152e+08	6.51022e+08
Q8NE71	ABCF1	ATP-binding cassette sub-family F member 1 OS=Homo sapiens GN=ABCF1 PE=1 SV=2	57.8698	95.9	1.06161e+09	1.0446e+09	1.15843e+09	9.38626e+08	1.0511e+09	1.03555e+09	8.848e+08	5.97668e+08	9.39293e+08
Q9UG63	ABCF2	ATP-binding cassette sub-family F member 2 OS=Homo sapiens GN=ABCF2 PE=1 SV=2	30.9791	71.2	1.71459e+08	1.60847e+08	1.89727e+08	148936547	1.47548e+08	1.74398e+08	1.90395e+08	1.04066e+08	207002802
Q9NUQ8	ABCF3	ATP-binding cassette sub-family F member 3 OS=Homo sapiens GN=ABCF3 PE=1 SV=2	35.8251	79.7	1.3227e+08	1.38092e+08	1.48069e+08	1.44967e+08	1.15054e+08	1.56816e+08	1.49599e+08	7.12555e+07	1.55191e+08
Q9UNQ0	ABCG2	ATP-binding cassette sub-family G member 2 OS=Homo sapiens GN=ABCG2 PE=1 SV=3	7.32824	72.3	3.84987e+07	2.39234e+07	3.09724e+07				2.29402e+07	2.46285e+07	2.11718e+07
Q9NUJ1	ABHD10	Abhydrolase domain-containing protein 10, mitochondrial OS=Homo sapiens GN=ABHD10 PE=1 SV=1	41.8301	33.9	5.5488e+08	5.6203e+08	6.29692e+08	6.36548e+08	5.16707e+08	548976852	5.09754e+08	3.15357e+08	4.65885e+08
Q8NFV4	ABHD11	Abhydrolase domain-containing protein 11 OS=Homo sapiens GN=ABHD11 PE=1 SV=1	40.6349	34.7	9.60759e+07	9.57024e+07	1.36668e+08	1.04398e+08	8.54655e+07	7.68132e+07	1.01294e+08	5.61314e+07	1.01547e+08
Q8N2K0	ABHD12	Monoacylglycerol lipase ABHD12 OS=Homo sapiens GN=ABHD12 PE=2 SV=2	56.7839	45.1	2.51833e+08	2.94266e+08	3.59328e+08	2.9481e+08	2.8432e+08	3.29842e+08	2.22738e+08	1.72341e+08	3.09049e+08
Q7L211	ABHD13	Abhydrolase domain-containing protein 13 OS=Homo sapiens GN=ABHD13 PE=1 SV=1	8.01187	38.5	2.52156e+07	9062833	1.66214e+07		9.56121e+06	4.72985e+06
Q9BUJ0	ABHD14A	Abhydrolase domain-containing protein 14A OS=Homo sapiens GN=ABHD14A PE=2 SV=2	5.90406	29.7							4.35807e+06
Q96IU4	ABHD14B	Abhydrolase domain-containing protein 14B OS=Homo sapiens GN=ABHD14B PE=1 SV=1	55.2381	22.3	6.56811e+08	5.58026e+08	5.91028e+08	5.9493e+08	6.26619e+08	6.8986e+08	7.49045e+08	5.66664e+08	7.14876e+08
O95870	ABHD16A	Protein BAT5 OS=Homo sapiens GN=BAT5 PE=1 SV=3	29.2115	63.2	3.94313e+07	1.23169e+08	7.21738e+07	1.43248e+08	9.68278e+07	9.1796e+07	6.84845e+07	6.40027e+07
Q5VST6	ABHD17B	Abhydrolase domain-containing protein FAM108B1 OS=Homo sapiens GN=FAM108B1 PE=2 SV=1	23.2639	32.2	1.70681e+07	1.71173e+07	67951564	2.23247e+07	1.33948e+07	2.84372e+07	3.14251e+07	5.47994e+06	15343896
Q0P651	ABHD18	Uncharacterized protein C4orf29 OS=Homo sapiens GN=C4orf29 PE=1 SV=1	4.10628	46.9
P08910	ABHD2	Abhydrolase domain-containing protein 2 OS=Homo sapiens GN=ABHD2 PE=2 SV=1	9.64706	48.3
Q8WU67	ABHD3	Abhydrolase domain-containing protein 3 OS=Homo sapiens GN=ABHD3 PE=2 SV=2	14.1809	46				67182048	52591527	70767131			5.14089e+07
Q8WTS1	ABHD5	1-acylglycerol-3-phosphate O-acyltransferase ABHD5 OS=Homo sapiens GN=ABHD5 PE=1 SV=1	6.30372	39.1		5.94616e+06
Q9BV23	ABHD6	Monoacylglycerol lipase ABHD6 OS=Homo sapiens GN=ABHD6 PE=2 SV=1	20.178	38.3	5.10233e+07		4.94577e+07		1.29373e+07	5.23416e+07	1.13378e+07	3.38811e+07	52621208
Q8IZP0	ABI1	Abl interactor 1 OS=Homo sapiens GN=ABI1 PE=1 SV=4	29.9213	55	1.70055e+08	1.52992e+08	2.74881e+08	115765954	1.71974e+08	1.70326e+08	1.70944e+08	1.04142e+08	1.75692e+08
Q9NYB9	ABI2	Abl interactor 2 OS=Homo sapiens GN=ABI2 PE=1 SV=1	9.94152	55.6			4.80485e+07	5.48062e+07		4.49298e+07
O14639	ABLIM1	Actin-binding LIM protein 1 OS=Homo sapiens GN=ABLIM1 PE=1 SV=3	21.0797	87.6	1.08002e+08	9.56957e+07	1.41672e+08	7.02586e+07	9.37089e+07	1.02702e+08	7.96231e+07	8.85066e+07	160807485
Q12979	ABR	Active breakpoint cluster region-related protein OS=Homo sapiens GN=ABR PE=1 SV=1	24.2142	97.6	4.67439e+07	3.28041e+07	1.89748e+07		3.03836e+07		2.24175e+07	5.91153e+06
Q9P1F3	ABRACL	UPF0727 protein C6orf115 OS=Homo sapiens GN=C6orf115 PE=1 SV=1	19.7531	9.1	4.53282e+07
Q6UWZ7	ABRAXAS1	BRCA1-A complex subunit Abraxas OS=Homo sapiens GN=FAM175A PE=1 SV=2	3.17848	46.6			1.28807e+07		1.70928e+07			1.35526e+07
Q15018	ABRAXAS2	BRISC complex subunit Abro1 OS=Homo sapiens GN=FAM175B PE=1 SV=2	9.63855	46.9					18402101	3.3291e+07		4.8204e+07
Q9ULW3	ABT1	Activator of basal transcription 1 OS=Homo sapiens GN=ABT1 PE=1 SV=1	39.3382	31.1	1.02274e+08	1.20262e+08	1.99362e+08	9.7463e+07	1.4482e+08	1.2351e+08	1.34334e+08	1.27503e+08	1.43194e+08
Q8N961	ABTB2	Ankyrin repeat and BTB/POZ domain-containing protein 2 OS=Homo sapiens GN=ABTB2 PE=2 SV=1	3.93325	93.2	3.32094e+07	31991764	38022511				36106010
P09110	ACAA1	3-ketoacyl-CoA thiolase, peroxisomal OS=Homo sapiens GN=ACAA1 PE=1 SV=2	79.2453	44.3	5.59528e+08	5.32828e+08	6.2252e+08	5.07175e+08	5.12022e+08	5.18128e+08	5.95528e+08	3.60855e+08	6.37457e+08
P42765	ACAA2	3-ketoacyl-CoA thiolase, mitochondrial OS=Homo sapiens GN=ACAA2 PE=1 SV=2	75.063	41.9	1530159772	1.45376e+09	1.6556e+09	1.296e+09	1.44222e+09	1.47701e+09	1.44022e+09	9.30152e+08	1.51117e+09
Q13085	ACACA	Acetyl-CoA carboxylase 1 OS=Homo sapiens GN=ACACA PE=1 SV=2	40.4518	265.4	1.26086e+08	1.71945e+08	1.79595e+08	1.06046e+08	8.06822e+07	8.66791e+07	1.58614e+08	7.84264e+07	1.47116e+08
O00763	ACACB	Acetyl-CoA carboxylase 2 OS=Homo sapiens GN=ACACB PE=1 SV=2	5.85842	276.4					1.21417e+08
Q6JQN1	ACAD10	Acyl-CoA dehydrogenase family member 10 OS=Homo sapiens GN=ACAD10 PE=2 SV=1	24.9292	118.8	7.54733e+07	7.11995e+07	75071109	1.11303e+08	1.01577e+08	75341588	8.68837e+07	38125803	8.3669e+07
Q709F0	ACAD11	Acyl-CoA dehydrogenase family member 11 OS=Homo sapiens GN=ACAD11 PE=1 SV=2	30.641	87.2	2.51755e+08	2.70106e+08	1.80208e+08	1.53725e+08	1.34004e+08	1.55441e+08	2.39182e+08	1.34255e+08	1.6517e+08
Q9UKU7	ACAD8	Isobutyryl-CoA dehydrogenase, mitochondrial OS=Homo sapiens GN=ACAD8 PE=1 SV=1	27.2289	45	6.69527e+07	7.34314e+07	3.50135e+07	1.1186e+08	9903609	5.51157e+07	16486153	2.45109e+07	6.50086e+07
Q9H845	ACAD9	Acyl-CoA dehydrogenase family member 9, mitochondrial OS=Homo sapiens GN=ACAD9 PE=1 SV=1	52.9791	68.7	5.2357e+08	4.94727e+08	6.27115e+08	4.37391e+08	4.78822e+08	5.015e+08	4.7959e+08	283818522	501159658
P11310	ACADM	Medium-chain specific acyl-CoA dehydrogenase, mitochondrial OS=Homo sapiens GN=ACADM PE=1 SV=1	51.5439	46.6	1.56567e+09	1.56571e+09	1.67675e+09	1674799404	1.56404e+09	1614578272	1.50373e+09	1.03814e+09	1.63685e+09
P16219	ACADS	Short-chain specific acyl-CoA dehydrogenase, mitochondrial OS=Homo sapiens GN=ACADS PE=1 SV=1	57.0388	44.3	6.89096e+08	6.67769e+08	8.03431e+08	6.96039e+08	6.81782e+08	7.38733e+08	6.10189e+08	3.65565e+08	7.19402e+08
P45954	ACADSB	Short/branched chain specific acyl-CoA dehydrogenase, mitochondrial OS=Homo sapiens GN=ACADSB PE=1 SV=1	60.6481	47.5	1.95969e+09	1.86467e+09	1.98657e+09	2.10497e+09	1.93858e+09	2.19715e+09	1.83993e+09	1.14662e+09	1.9682e+09
P49748	ACADVL	Very long-chain specific acyl-CoA dehydrogenase, mitochondrial OS=Homo sapiens GN=ACADVL PE=1 SV=1	68.7023	70.3	3.53931e+09	3544707616	3771222878	3666751448	3.59911e+09	3.94777e+09	3746541147	2371663138	3.57158e+09
Q15057	ACAP2	Arf-GAP with coiled-coil, ANK repeat and PH domain-containing protein 2 OS=Homo sapiens GN=ACAP2 PE=1 SV=3	17.6093	88	1.20429e+07	9.78829e+06	1.77354e+07		1.84719e+07	10853836		3.82761e+07	1.20819e+07
Q96P50	ACAP3	Arf-GAP with coiled-coil, ANK repeat and PH domain-containing protein 3 OS=Homo sapiens GN=ACAP3 PE=2 SV=2	4.55635	92.4		1.58127e+06	3.0404e+06	5.90633e+06			4769189		4.78331e+06
P24752	ACAT1	Acetyl-CoA acetyltransferase, mitochondrial OS=Homo sapiens GN=ACAT1 PE=1 SV=1	79.6253	45.2	3.31778e+09	2.73855e+09	3815039813	3.42422e+09	3.25871e+09	3.44263e+09	2.99807e+09	1.7801e+09	3.47838e+09
Q9BWD1	ACAT2	Acetyl-CoA acetyltransferase, cytosolic OS=Homo sapiens GN=ACAT2 PE=1 SV=2	57.1788	41.3	4.99212e+08	3.47348e+08	436097396	5.44456e+08	5.00018e+08	5.29235e+08	5.81097e+08	401000634	6.09172e+08
Q9H3P7	ACBD3	Golgi resident protein GCP60 OS=Homo sapiens GN=ACBD3 PE=1 SV=4	54.1667	60.6	3.56401e+08	3.39457e+08	4.06141e+08	2.76917e+08	2.69772e+08	274671398	3.25287e+08	2.3095e+08	324156602
Q5T8D3	ACBD5	Acyl-CoA-binding domain-containing protein 5 OS=Homo sapiens GN=ACBD5 PE=1 SV=1	16.1049	60.1	2.43398e+08	2.82866e+08	2.94683e+08	2.64224e+08	2.81911e+08	2.70102e+08	2.63517e+08	1.42567e+08	2.84127e+08
Q9BR61	ACBD6	Acyl-CoA-binding domain-containing protein 6 OS=Homo sapiens GN=ACBD6 PE=1 SV=1	6.73759	31.1				29133565	28724699	2.0621e+07		25767403
Q96AP0	ACD	Adrenocortical dysplasia protein homolog OS=Homo sapiens GN=ACD PE=1 SV=2	7.53676	57.7
Q9UKV3	ACIN1	Apoptotic chromatin condensation inducer in the nucleus OS=Homo sapiens GN=ACIN1 PE=1 SV=1	29.9776	151.8	5.7106e+08	6.28336e+08	716489863	4.97203e+08	6.32438e+08	7.01481e+08	6.1322e+08	3.74707e+08	6.36753e+08
P53396	ACLY	ATP-citrate synthase OS=Homo sapiens GN=ACLY PE=1 SV=3	53.951	120.8	1.02517e+09	9.59593e+08	1.095e+09	8.33633e+08	7.20979e+08	9.39892e+08	9.83803e+08	6.18257e+08	1.05096e+09
P21399	ACO1	Cytoplasmic aconitate hydratase OS=Homo sapiens GN=ACO1 PE=1 SV=3	35.9955	98.3	192789655	1.71185e+08	2.35403e+08	1.77172e+08	2.15345e+08	1.48066e+08	2.14819e+08	1.09335e+08	2.55783e+08
Q99798	ACO2	Aconitate hydratase, mitochondrial OS=Homo sapiens GN=ACO2 PE=1 SV=2	65	85.4	1.56108e+09	1534225076	1.84551e+09	1.63263e+09	1.55601e+09	1.63957e+09	1.52851e+09	1.02258e+09	1361405228
Q86TX2	ACOT1	Acyl-coenzyme A thioesterase 1 OS=Homo sapiens GN=ACOT1 PE=1 SV=1	69.1211	46.2	255571635	2.51456e+08	1.00535e+08	1.00561e+08	3.9587e+07		732591168	5.44853e+08	3.80771e+07
Q9NPJ3	ACOT13	Acyl-coenzyme A thioesterase 13 OS=Homo sapiens GN=ACOT13 PE=1 SV=1	72.1429	15	9.07276e+08	8.71814e+08	9.45607e+08	7.20484e+08	7.15749e+08	7.95329e+08	7.64727e+08	5.3177e+08	830723234
P49753	ACOT2	Acyl-coenzyme A thioesterase 2, mitochondrial OS=Homo sapiens GN=ACOT2 PE=1 SV=6	51.1387	53.2	6.9644e+08	7.00054e+08	6.95056e+08	5.53595e+08	514060656	6.48618e+08	5.27383e+08	2.49462e+08	655218788
O00154	ACOT7	Cytosolic acyl coenzyme A thioester hydrolase OS=Homo sapiens GN=ACOT7 PE=1 SV=3	39.7368	41.8	275534035	2.7797e+08	2.994e+08	3.59248e+08	3.44621e+08	3.54017e+08	388506849	2.2577e+08	3.93079e+08
O14734	ACOT8	Acyl-coenzyme A thioesterase 8 OS=Homo sapiens GN=ACOT8 PE=1 SV=1	38.2445	35.9	3.36707e+08	4.52166e+08	5.77402e+08	5.27915e+08	3.97082e+08	5.53297e+08	1.54707e+08	2.39913e+08	4.8138e+08
Q9Y305	ACOT9	Acyl-coenzyme A thioesterase 9, mitochondrial OS=Homo sapiens GN=ACOT9 PE=1 SV=2	51.0251	49.9	3.68709e+08	3.30515e+08	4.47916e+08	3.52271e+08	3.28617e+08	3.46585e+08	3.89037e+08	2.00064e+08	3.221e+08
Q15067	ACOX1	Peroxisomal acyl-coenzyme A oxidase 1 OS=Homo sapiens GN=ACOX1 PE=1 SV=3	64.5455	74.4	3.10893e+09	2.83035e+09	3.20777e+09	3.2263e+09	2.80342e+09	2.99599e+09	2.85295e+09	1.85557e+09	2.9484e+09
Q99424	ACOX2	Peroxisomal acyl-coenzyme A oxidase 2 OS=Homo sapiens GN=ACOX2 PE=1 SV=1	34.5081	76.8	1.15172e+08	103261867	1.39274e+08	1.11589e+08	1.102e+08	8.94386e+07	1.46875e+08	9.41495e+07	1.25212e+08
O15254	ACOX3	Peroxisomal acyl-coenzyme A oxidase 3 OS=Homo sapiens GN=ACOX3 PE=1 SV=2	52.5714	77.6	1.75295e+08	1.86976e+08	1.48366e+08	1.64091e+08	1.48957e+08	1.65318e+08	1.54427e+08	9.50335e+07	1.36704e+08
P24666	ACP1	Low molecular weight phosphotyrosine protein phosphatase OS=Homo sapiens GN=ACP1 PE=1 SV=3	72.1519	18	8.83037e+08	8.46525e+08	6.48214e+08	7.02189e+08	9.16666e+08	6.96374e+08	9.47721e+08	6.44985e+08	9.92727e+08
P11117	ACP2	Lysosomal acid phosphatase OS=Homo sapiens GN=ACP2 PE=1 SV=3	18.6761	48.3	1.1468e+08	1.11661e+08	1.19066e+08	5.42885e+07	1.11591e+08	9.4042e+07	1.10458e+08	6.57074e+07	9.227e+07
Q9NPH0	ACP6	Lysophosphatidic acid phosphatase type 6 OS=Homo sapiens GN=ACP6 PE=1 SV=1	19.6262	48.9	5.04421e+07	4.3e+07	2.87979e+07	4.03845e+07	4.09582e+07	3.92884e+07	2.88551e+07	1.60047e+07	5.92075e+07
Q96CM8	ACSF2	Acyl-CoA synthetase family member 2, mitochondrial OS=Homo sapiens GN=ACSF2 PE=1 SV=2	50.5691	68.1	5.39611e+08	5.53961e+08	5.66717e+08	4.74179e+08	4.90574e+08	5.24034e+08	5.06857e+08	3.6483e+08	4.4933e+08
Q4G176	ACSF3	Acyl-CoA synthetase family member 3, mitochondrial OS=Homo sapiens GN=ACSF3 PE=1 SV=2	30.7292	64.1	1.93672e+08	1.38908e+08	1.18344e+08	1.82816e+08	1.24933e+08	9.50311e+07	1.64255e+08	6.04666e+07	1.43165e+08
P33121	ACSL1	Long-chain-fatty-acid--CoA ligase 1 OS=Homo sapiens GN=ACSL1 PE=1 SV=1	50.2865	77.9	5.29753e+08	4.47038e+08	4.97452e+08	4.68377e+08	4.64878e+08	502515474	4.24277e+08	2.63658e+08	4.64863e+08
O95573	ACSL3	Long-chain-fatty-acid--CoA ligase 3 OS=Homo sapiens GN=ACSL3 PE=1 SV=3	48.8889	80.4	7.95022e+08	7.56732e+08	9.64872e+08	8.67018e+08	9.12422e+08	9.73989e+08	7.51429e+08	4.82492e+08	8.28834e+08
O60488	ACSL4	Long-chain-fatty-acid--CoA ligase 4 OS=Homo sapiens GN=ACSL4 PE=1 SV=2	57.5246	79.1	1791736822	1663609322	2.01493e+09	1.76173e+09	1.63072e+09	1.65931e+09	1.46076e+09	9.22021e+08	1.50509e+09
Q9ULC5	ACSL5	Long-chain-fatty-acid--CoA ligase 5 OS=Homo sapiens GN=ACSL5 PE=1 SV=1	56.8082	75.9	2.09173e+09	2.0291e+09	2.26885e+09	2.63182e+09	2.09347e+09	2.31487e+09	2.01246e+09	1.22146e+09	2.13973e+09
Q68CK6	ACSM2B	Acyl-coenzyme A synthetase ACSM2B, mitochondrial OS=Homo sapiens GN=ACSM2B PE=1 SV=1	4.67938	64.2									2.82258e+06
Q53FZ2	ACSM3	Acyl-coenzyme A synthetase ACSM3, mitochondrial OS=Homo sapiens GN=ACSM3 PE=1 SV=2	18.43	66.1	3.51704e+07	3.38513e+07	4.49926e+07	3.0442e+07			2.85407e+07	1.73528e+07
Q9NUB1	ACSS1	Acetyl-coenzyme A synthetase 2-like, mitochondrial OS=Homo sapiens GN=ACSS1 PE=1 SV=2	43.9768	74.8	2.84557e+08	2.57421e+08	3.814e+08	3.95428e+08	3.47155e+08	3.90215e+08	3.2772e+08	2.54364e+08	3.74924e+08
Q9NR19	ACSS2	Acetyl-coenzyme A synthetase, cytoplasmic OS=Homo sapiens GN=ACSS2 PE=1 SV=1	6.56205	78.5	1.11893e+07	1.19167e+07			8.52863e+06	1.71489e+07	1.71743e+07		16811211
Q9H6R3	ACSS3	Acyl-CoA synthetase short-chain family member 3, mitochondrial OS=Homo sapiens GN=ACSS3 PE=2 SV=1	49.4169	74.7	6.29781e+08	6.17122e+08	7.38398e+08	6.35092e+08	5.72573e+08	7.09279e+08	570547640	4.46025e+08	6.34286e+08
P68133	ACTA1	Actin, alpha skeletal muscle OS=Homo sapiens GN=ACTA1 PE=1 SV=1	68.1698	42				298649516
P62736	ACTA2	Actin, aortic smooth muscle OS=Homo sapiens GN=ACTA2 PE=1 SV=1	68.435	42	2.25609e+08	254615302	2.9731e+08	1.61324e+08	2.6768e+08	255899403	2.93285e+08	1.79087e+08	1.79909e+08
P60709	ACTB	Actin, cytoplasmic 1 OS=Homo sapiens GN=ACTB PE=1 SV=1	74.9333	41.7	1.99927e+10	17480058226	1.8992e+10	20539742376	17115050844	16950350412	2.32359e+10	1.4304e+10	2.03513e+10
Q562R1	ACTBL2	Beta-actin-like protein 2 OS=Homo sapiens GN=ACTBL2 PE=1 SV=2	38.8298	42	4.13938e+08	196263034	108795201	161857433			7.45213e+07	24861525
P63261	ACTG1	Actin, cytoplasmic 2 OS=Homo sapiens GN=ACTG1 PE=1 SV=1	75.2	41.8	24480305248	22187990704	24612270343	24504253302	19953484570	19490220900	24517320091	14191418222	23978045320
O96019	ACTL6A	Actin-like protein 6A OS=Homo sapiens GN=ACTL6A PE=1 SV=1	50.3497	47.4	9.66242e+08	8.60106e+08	9.6158e+08	817782027	8.12925e+08	9.06773e+08	792782906	5.42415e+08	7.77022e+08
P12814	ACTN1	Alpha-actinin-1 OS=Homo sapiens GN=ACTN1 PE=1 SV=2	76.6816	103	1.53982e+09	1.58333e+09	1.73058e+09	1.11941e+09	7.8145e+08	9.84334e+08	1.61453e+09	1.00807e+09	1.71074e+09
O43707	ACTN4	Alpha-actinin-4 OS=Homo sapiens GN=ACTN4 PE=1 SV=2	78.9243	104.8	7.25746e+09	7.35758e+09	7.8567e+09	5.01693e+09	4.73445e+09	4.96523e+09	7.45301e+09	4.81409e+09	7.04813e+09
Q9NZ32	ACTR10	Actin-related protein 10 OS=Homo sapiens GN=ACTR10 PE=1 SV=1	27.8177	46.3	6.80044e+07	7.04828e+07	9.87739e+07	8.34092e+07	7.43851e+07	8.04837e+07	5.59737e+07	3.42476e+07	7.50386e+07
P61163	ACTR1A	Alpha-centractin OS=Homo sapiens GN=ACTR1A PE=1 SV=1	60.3723	42.6	9.33784e+08	9.80285e+08	9.87172e+08	7.3794e+08	8.5731e+08	9.77028e+08	7.67061e+08	5.08664e+08	8.8129e+08
P42025	ACTR1B	Beta-centractin OS=Homo sapiens GN=ACTR1B PE=1 SV=1	55.5851	42.3	4.17721e+08	4.18588e+08	4.56682e+08	3.1678e+08	3.52127e+08	4.06547e+08	3.33513e+08	2.52493e+08	4.07334e+08
P61160	ACTR2	Actin-related protein 2 OS=Homo sapiens GN=ACTR2 PE=1 SV=1	39.3401	44.7	1.86803e+09	1.81878e+09	1.95428e+09	1.59052e+09	1.5986e+09	1.56367e+09	1.22703e+09	1.18018e+09	1.78954e+09
P61158	ACTR3	Actin-related protein 3 OS=Homo sapiens GN=ACTR3 PE=1 SV=3	57.8947	47.3	1.58816e+09	1.42472e+09	1.47356e+09	1.19586e+09	1.16513e+09	1.25079e+09	1.41975e+09	1.02795e+09	1.25435e+09
Q9C0K3	ACTR3C	Actin-related protein 11 OS=Homo sapiens GN=ARP11 PE=2 SV=1	24.7619	23.7			3.52077e+08
Q9H9F9	ACTR5	Actin-related protein 5 OS=Homo sapiens GN=ACTR5 PE=1 SV=2	31.9605	68.3	3.34606e+07	3.89463e+07	5.03622e+07	2.96071e+07	5.98533e+07	26239661	2.77088e+07	3.63811e+07	3.12543e+07
Q9GZN1	ACTR6	Actin-related protein 6 OS=Homo sapiens GN=ACTR6 PE=1 SV=1	3.78788	45.8		3.18518e+07
Q9H981	ACTR8	Actin-related protein 8 OS=Homo sapiens GN=ACTR8 PE=1 SV=2	7.37179	70.4	19450223	1.29714e+07		13090555	2.25301e+07	23111059	2.20367e+07		1.51797e+07
Q04771	ACVR1	Activin receptor type-1 OS=Homo sapiens GN=ACVR1 PE=1 SV=1	4.91159	57.1			1.60693e+07
P27037	ACVR2A	Activin receptor type-2A OS=Homo sapiens GN=ACVR2A PE=2 SV=1	2.92398	57.8
Q03154	ACY1	Aminoacylase-1 OS=Homo sapiens GN=ACY1 PE=1 SV=1	78.9216	45.9	540328464	4.97988e+08	4.97894e+08	5.09041e+08	4.48755e+08	5.39357e+08	6.03928e+08	3.89212e+08	5.64043e+08
P07311	ACYP1	Acylphosphatase-1 OS=Homo sapiens GN=ACYP1 PE=1 SV=2	50.5051	11.3	46240028	6.86266e+07	7.03417e+07
P00813	ADA	Adenosine deaminase OS=Homo sapiens GN=ADA PE=1 SV=3	4.40771	40.7			2.95258e+07
O14672	ADAM10	Disintegrin and metalloproteinase domain-containing protein 10 OS=Homo sapiens GN=ADAM10 PE=1 SV=1	51.6043	84.1	4.64498e+08	4.7093e+08	3.09502e+08	4.60379e+08	4.12764e+08	2.61382e+08	4.21319e+08	2.64196e+08	4.30528e+08
Q13444	ADAM15	Disintegrin and metalloproteinase domain-containing protein 15 OS=Homo sapiens GN=ADAM15 PE=1 SV=2	3.9312	87.7								4.55063e+06
P78536	ADAM17	Disintegrin and metalloproteinase domain-containing protein 17 OS=Homo sapiens GN=ADAM17 PE=1 SV=1	15.534	93	1.14657e+08	1.00772e+08	1.42746e+08	9.22322e+07	7.86823e+07	8.52917e+07	8.04376e+07	3.29308e+07	112692755
Q13443	ADAM9	Disintegrin and metalloproteinase domain-containing protein 9 OS=Homo sapiens GN=ADAM9 PE=1 SV=1	30.0366	90.5	2.03439e+08	2.08656e+08	2.3941e+08	8.84016e+07	1.47109e+08	2.20033e+08	1.33707e+08	1.42391e+08	1.44839e+08
P55265	ADAR	Double-stranded RNA-specific adenosine deaminase OS=Homo sapiens GN=ADAR PE=1 SV=3	38.8254	135.9	4.36903e+08	4.38905e+08	8.61383e+08	4.36331e+08	3.97391e+08	4.66241e+08	4.62461e+08	3.27818e+08	4.62195e+08
P78563	ADARB1	Double-stranded RNA-specific editase 1 OS=Homo sapiens GN=ADARB1 PE=1 SV=1	6.34278	80.7		8.74334e+06	1.8759e+07
Q86TW2	ADCK1	Uncharacterized aarF domain-containing protein kinase 1 OS=Homo sapiens GN=ADCK1 PE=1 SV=2	6.60377	60.5
Q3MIX3	ADCK5	Uncharacterized aarF domain-containing protein kinase 5 OS=Homo sapiens GN=ADCK5 PE=2 SV=2	5	65.9
O43306	ADCY6	Adenylate cyclase type 6 OS=Homo sapiens GN=ADCY6 PE=1 SV=2	1.45548	130.5				4.73271e+06
P51828	ADCY7	Adenylate cyclase type 7 OS=Homo sapiens GN=ADCY7 PE=2 SV=1	1.57407	120.2		2.79998e+06	4.95126e+06
O60503	ADCY9	Adenylate cyclase type 9 OS=Homo sapiens GN=ADCY9 PE=1 SV=4	13.082	150.6	3.80348e+07	5.85679e+07	3.99035e+07	3.9212e+07	2.00272e+07	3.70627e+07	2.59511e+07	3.00287e+07	4.95309e+07
P35611	ADD1	Alpha-adducin OS=Homo sapiens GN=ADD1 PE=1 SV=2	29.9864	80.9	3.33887e+08	2.54861e+08	3.07174e+08	2.704e+08	2.09171e+08	2.00011e+08	282909582	2.19198e+08	2.72854e+08
Q9UEY8	ADD3	Gamma-adducin OS=Homo sapiens GN=ADD3 PE=1 SV=1	26.3456	79.1	225595815	221157640	2.13581e+08	1.67158e+08	1.33924e+08	1.30345e+08	1.95736e+08	1.63064e+08	228200142
Q8IWK6	ADGRA3	Probable G-protein coupled receptor 125 OS=Homo sapiens GN=GPR125 PE=1 SV=2	2.72521	146.1						65673970	3.74671e+07
P48960	ADGRE5	CD97 antigen OS=Homo sapiens GN=CD97 PE=1 SV=4	7.90419	91.8	4.53965e+07	36152118	5.11223e+07	3.88675e+07	2.79574e+07	53775246	62893789	1.85622e+07	5.85558e+07
Q9Y653	ADGRG1	G-protein coupled receptor 56 OS=Homo sapiens GN=GPR56 PE=1 SV=2	4.6176	77.7
Q86SQ4	ADGRG6	G-protein coupled receptor 126 OS=Homo sapiens GN=GPR126 PE=1 SV=3	10.7289	136.6	4.30265e+07	8.66271e+07	9.49938e+07	7.20542e+07	6.07373e+07	7.2352e+07	72676540	3.2785e+06	21752478
O95490	ADGRL2	Latrophilin-2 OS=Homo sapiens GN=LPHN2 PE=1 SV=2	7.95065	163.2	5.17832e+07	3.9609e+07	6.61049e+07	55899439	4.46214e+07	5.46529e+07		1.94099e+07	39943632
Q9HAR2	ADGRL3	Latrophilin-3 OS=Homo sapiens GN=LPHN3 PE=1 SV=2	2.07326	161.7
Q8WXG9	ADGRV1	G-protein coupled receptor 98 OS=Homo sapiens GN=GPR98 PE=1 SV=1	0.174409	692.2									92402096
P08319	ADH4	Alcohol dehydrogenase 4 OS=Homo sapiens GN=ADH4 PE=1 SV=4	47.1053	40.2	274008226	2.61505e+08	3.33429e+08	2.8369e+08	2.43286e+08	2.18725e+08	3.14128e+08	1.88276e+08	2.50018e+08
P11766	ADH5	Alcohol dehydrogenase class-3 OS=Homo sapiens GN=ADH5 PE=1 SV=4	50	39.7	1.04139e+09	1.00441e+09	1.01103e+09	1205114065	1.02738e+09	1.03004e+09	1.08443e+09	7.59261e+08	1.08256e+09
P28332	ADH6	Alcohol dehydrogenase 6 OS=Homo sapiens GN=ADH6 PE=2 SV=2	38.587	39.1	3.29275e+08	3.7105e+08	3.92855e+08	1.68386e+08	2.14054e+08	261914116	3.2291e+08	1.79172e+08	3.62408e+08
Q9BV57	ADI1	1,2-dihydroxy-3-keto-5-methylthiopentene dioxygenase OS=Homo sapiens GN=ADI1 PE=1 SV=1	50.2793	21.5	1.50999e+08	2.00674e+08	2.17555e+08	1.34209e+08	1.72953e+08	1.66257e+08	1.92969e+08	1.30912e+08	1.9514e+08
P55263	ADK	Adenosine kinase OS=Homo sapiens GN=ADK PE=1 SV=2	70.7182	40.5	4.32462e+08	2.90567e+08	5.22291e+08	4.24426e+08	3.75109e+08	3.91436e+08	4.58162e+08	2.70404e+08	4.13684e+08
Q9H2P0	ADNP	Activity-dependent neuroprotector homeobox protein OS=Homo sapiens GN=ADNP PE=1 SV=1	21.2341	123.5	4.24271e+07	9.19915e+07	1.01388e+08	3.07807e+07	39808703	2.48354e+07	54067848	6.15647e+07	4.05183e+07
Q96SZ5	ADO	2-aminoethanethiol dioxygenase OS=Homo sapiens GN=ADO PE=1 SV=2	8.88889	29.7					1.1772e+07
Q9BRR6	ADPGK	ADP-dependent glucokinase OS=Homo sapiens GN=ADPGK PE=1 SV=1	41.4487	54.1	2.80903e+08	2.91488e+08	3.53895e+08	2.44744e+08	1.24024e+08	2.54903e+08	1.51448e+08	69011158	1.60009e+08
Q9NX46	ADPRS	Poly(ADP-ribose) glycohydrolase ARH3 OS=Homo sapiens GN=ADPRHL2 PE=1 SV=1	42.1488	38.9	1.61448e+08	1.80149e+08	1.93823e+08	1.8374e+08	1.71344e+08	1.80143e+08	1.81056e+08	1.29837e+08	1.92394e+08
Q16186	ADRM1	Proteasomal ubiquitin receptor ADRM1 OS=Homo sapiens GN=ADRM1 PE=1 SV=2	19.1646	42.1	4.36206e+08	448523219	4.81227e+08	4.33985e+08	3.22534e+08	3.75186e+08	4.88486e+08	3.08924e+08	4.88407e+08
P30566	ADSL	Adenylosuccinate lyase OS=Homo sapiens GN=ADSL PE=1 SV=2	53.3058	54.9	6.64404e+08	6.48191e+08	7.10415e+08	5.10802e+08	4.45055e+08	5.19472e+08	5.94761e+08	3.76906e+08	6.56381e+08
Q8N142	ADSS1	Adenylosuccinate synthetase isozyme 1 OS=Homo sapiens GN=ADSSL1 PE=1 SV=1	6.12691	50.2
P30520	ADSS2	Adenylosuccinate synthetase isozyme 2 OS=Homo sapiens GN=ADSS PE=1 SV=3	38.8158	50.1	1.47883e+08	1.24114e+08	1.35711e+08	1.54981e+08	1.34044e+08	1.59053e+08	1.55944e+08	9.76518e+07	1.41509e+08
P55196	AFDN	Afadin OS=Homo sapiens GN=MLLT4 PE=1 SV=3	30.2083	206.7	3.30023e+08	3.21317e+08	1.77051e+08	1.5033e+08	135298329	2.5152e+08	1.50958e+08	8.30952e+07	259807880
Q9UHB7	AFF4	AF4/FMR2 family member 4 OS=Homo sapiens GN=AFF4 PE=1 SV=1	2.83749	127.4
Q8WV93	AFG1L	Lactation elevated protein 1 OS=Homo sapiens GN=LACE1 PE=2 SV=2	3.3264	54.8
Q9Y4W6	AFG3L2	AFG3-like protein 2 OS=Homo sapiens GN=AFG3L2 PE=1 SV=2	46.675	88.5	5.01357e+08	5.07343e+08	5.03069e+08	8.8498e+08	1.31489e+09	7.7727e+08	6.25492e+08	2.9582e+08	8.28031e+08
Q63HM1	AFMID	Probable arylformamidase OS=Homo sapiens GN=AFMID PE=2 SV=2	8.91089	34
P02771	AFP	Alpha-fetoprotein OS=Homo sapiens GN=AFP PE=1 SV=1	65.8456	68.6	6.07839e+08	5.9611e+08	6.55268e+08	5.77162e+08	5.21161e+08	5.83208e+08	4.60709e+08	3.07159e+08	4.74384e+08
Q6ULP2	AFTPH	Aftiphilin OS=Homo sapiens GN=AFTPH PE=1 SV=2	1.8143	102.1							14661592
P20933	AGA	N(4)-(beta-N-acetylglucosaminyl)-L-asparaginase OS=Homo sapiens GN=AGA PE=1 SV=2	18.4971	37.2	220129550	2.31519e+08	204374840	1.85968e+08	1.25656e+08	2.40012e+08	1.64333e+08	9.77519e+07	2.48759e+08
Q9UPQ3	AGAP1	Arf-GAP with GTPase, ANK repeat and PH domain-containing protein 1 OS=Homo sapiens GN=AGAP1 PE=1 SV=4	3.85064	94.4
Q96P47	AGAP3	Arf-GAP with GTPase, ANK repeat and PH domain-containing protein 3 OS=Homo sapiens GN=AGAP3 PE=1 SV=2	3.77143	95	7.85578e+06	1.22461e+07	1.08297e+07
A6NIR3	AGAP5	Arf-GAP with GTPase, ANK repeat and PH domain-containing protein 5 OS=Homo sapiens GN=AGAP5 PE=2 SV=1	4.97738	72.9
Q96MI9	AGBL1	Cytosolic carboxypeptidase 4 OS=Homo sapiens GN=AGBL1 PE=2 SV=2	1.50094	120.2
Q15109	AGER	Advanced glycosylation end product-specific receptor OS=Homo sapiens GN=AGER PE=1 SV=1	7.17822	42.8
P52594	AGFG1	Arf-GAP domain and FG repeats-containing protein 1 OS=Homo sapiens GN=AGFG1 PE=1 SV=2	26.6904	58.2	1.7412e+08	1.61915e+08	1.87319e+08	1.71655e+08	1.79595e+08	1.79102e+08	1.64301e+08	1.21234e+08	1.92972e+08
O95081	AGFG2	Arf-GAP domain and FG repeats-containing protein 2 OS=Homo sapiens GN=AGFG2 PE=1 SV=2	10.395	48.9	2.91916e+08	3.06232e+08	3.47241e+08	2.43331e+08	2.30368e+08	1.58247e+08	2.19451e+08	1.52633e+08	291666641
Q53H12	AGK	Acylglycerol kinase, mitochondrial OS=Homo sapiens GN=AGK PE=1 SV=2	59.7156	47.1	707502225	6.77519e+08	8.3505e+08	7.89857e+08	7.17468e+08	8.18983e+08	650419842	4.36847e+08	7.34525e+08
P35573	AGL	Glycogen debranching enzyme OS=Homo sapiens GN=AGL PE=1 SV=3	20.8877	174.7	4.46569e+07	4.44528e+07	5.73851e+07	5.04505e+07	3.8798e+07	5.6053e+07	1.79203e+08	3.36929e+07	7.49356e+07
Q9BSE5	AGMAT	Agmatinase, mitochondrial OS=Homo sapiens GN=AGMAT PE=1 SV=2	51.4205	37.6	4.95415e+09	4.72516e+09	5.40276e+09	5.01442e+09	4.6591e+09	5.03973e+09	5.02516e+09	3.19706e+09	4.94094e+09
Q9UL18	AGO1	Protein argonaute-1 OS=Homo sapiens GN=EIF2C1 PE=1 SV=3	8.98483	97.2	1.71155e+07			2.73573e+07					32893807
Q9UKV8	AGO2	Protein argonaute-2 OS=Homo sapiens GN=EIF2C2 PE=1 SV=3	18.6263	97.1	3.66317e+07	4.59128e+07	4.3707e+07	3.46386e+07	3.57256e+07	3.52886e+07	2.39397e+07	1.42112e+07	5.41686e+07
Q99943	AGPAT1	1-acyl-sn-glycerol-3-phosphate acyltransferase alpha OS=Homo sapiens GN=AGPAT1 PE=2 SV=2	20.8481	31.7	193783871	2.0666e+08	2.21706e+08	2.47577e+08	1.96458e+08	2.31101e+08	1.75548e+08	9.56815e+07	1.68526e+08
O15120	AGPAT2	1-acyl-sn-glycerol-3-phosphate acyltransferase beta OS=Homo sapiens GN=AGPAT2 PE=1 SV=1	12.9496	30.9		27899463	2.85723e+07			1.55389e+07
Q9NRZ7	AGPAT3	1-acyl-sn-glycerol-3-phosphate acyltransferase gamma OS=Homo sapiens GN=AGPAT3 PE=2 SV=1	18.0851	43.4	7.98057e+07	1.20277e+08	7.8272e+07	1.32889e+08	1.21434e+08	1.13214e+08	1.37081e+08	7.80087e+07	165908047
Q9NUQ2	AGPAT5	1-acyl-sn-glycerol-3-phosphate acyltransferase epsilon OS=Homo sapiens GN=AGPAT5 PE=1 SV=3	38.7363	42	1.76287e+08	1.361e+08	1.57536e+08	2.21145e+08	1.39795e+08	1.88933e+08	1.29618e+08	1.01807e+08	1.79427e+08
O00116	AGPS	Alkyldihydroxyacetonephosphate synthase, peroxisomal OS=Homo sapiens GN=AGPS PE=1 SV=1	37.9939	72.9	4.50725e+07	6.17874e+07	5.21316e+07	2.35085e+07	4.29871e+07	32758142	1.78809e+07	2.15172e+07	7.21892e+07
O95994	AGR2	Anterior gradient protein 2 homolog OS=Homo sapiens GN=AGR2 PE=1 SV=1	29.7143	20	4.32083e+07	4.96577e+07	6.39536e+07	3.41626e+07		4.85995e+07	6.14808e+07	35068980	5.81233e+07
O00468	AGRN	Agrin OS=Homo sapiens GN=AGRN PE=1 SV=4	22.934	214.7	7.33786e+07	7.11092e+07	7.72519e+07	4.61766e+07	3.94133e+07	4.82375e+07	5.1865e+07	3.88479e+07	7.06603e+07
P01019	AGT	Angiotensinogen OS=Homo sapiens GN=AGT PE=1 SV=1	38.1443	53.1	6.92696e+08	6.79848e+08	7.81445e+08	6.25023e+08	7.52915e+08	8.31656e+08	7.38373e+08	5.04246e+08	7.9675e+08
Q9UPW5	AGTPBP1	Cytosolic carboxypeptidase 1 OS=Homo sapiens GN=AGTPBP1 PE=1 SV=3	1.30506	138.4
Q6RW13	AGTRAP	Type-1 angiotensin II receptor-associated protein OS=Homo sapiens GN=AGTRAP PE=1 SV=1	30.1887	17.4	1.7656e+08	1.94891e+08	1.94036e+08	1.05953e+08	1.52028e+08	135705432	2.70573e+08	1.53089e+08	187579535
P21549	AGXT	Serine--pyruvate aminotransferase OS=Homo sapiens GN=AGXT PE=1 SV=1	43.3673	43	4.9699e+08	3.25638e+08	5.43427e+08	2.87827e+08	2.8752e+08	3.28241e+08	3.27743e+08	2.14959e+08	5.04487e+08
Q8WYP5	AHCTF1	Protein ELYS OS=Homo sapiens GN=AHCTF1 PE=1 SV=3	31.8623	252.3	7.74828e+07	1.09566e+08	147900160	102103245	1.08799e+08	8.37114e+07	1.17579e+08	8.84532e+07	8.79208e+07
P23526	AHCY	Adenosylhomocysteinase OS=Homo sapiens GN=AHCY PE=1 SV=4	50.2315	47.7	2.79217e+09	2841928456	3.12052e+09	2971914702	3.09874e+09	3.14144e+09	3.0935e+09	2.18547e+09	3376157712
O43865	AHCYL1	Putative adenosylhomocysteinase 2 OS=Homo sapiens GN=AHCYL1 PE=1 SV=2	43.2075	58.9	66359091	67178078	6.59122e+07	151075851	8.38433e+07		8.27547e+07	101626418	1.65331e+08
Q96HN2	AHCYL2	Putative adenosylhomocysteinase 3 OS=Homo sapiens GN=AHCYL2 PE=1 SV=1	18.8216	66.7	6.09608e+07			109506802	35176805	77677308			6.26677e+07
Q09666	AHNAK	Neuroblast differentiation-associated protein AHNAK OS=Homo sapiens GN=AHNAK PE=1 SV=2	52.7674	628.7	5.61995e+08	5.89927e+08	7.08331e+08	597311998	570472711	7.17253e+08	5.21104e+08	5.00525e+08	6.52562e+08
P35869	AHR	Aryl hydrocarbon receptor OS=Homo sapiens GN=AHR PE=1 SV=2	4.59906	96.1								3.16164e+06
O95433	AHSA1	Activator of 90 kDa heat shock protein ATPase homolog 1 OS=Homo sapiens GN=AHSA1 PE=1 SV=1	65.0888	38.3	7.19981e+08	7.36009e+08	7.80751e+08	9.25663e+08	8.23318e+08	8.9194e+08	8.26612e+08	5.49372e+08	8.12174e+08
P02765	AHSG	Alpha-2-HS-glycoprotein OS=Homo sapiens GN=AHSG PE=1 SV=1	46.3215	39.3	6.03432e+08	7.22881e+08	7.83104e+08	1005600290	8.79195e+08	8.66396e+08	5.43731e+08	4.0643e+08	5.42453e+08
Q96BJ3	AIDA	Axin interactor, dorsalization-associated protein OS=Homo sapiens GN=AIDA PE=1 SV=1	26.7974	35		9.56041e+06		1.46105e+07	9.84616e+06		9.04406e+06		2.14705e+07
Q9BQI0	AIF1L	Allograft inflammatory factor 1-like OS=Homo sapiens GN=AIF1L PE=1 SV=1	44.6667	17.1		5.6519e+07			7.69413e+07	74378730	9.63497e+07	7.29977e+07	7.26103e+07
O95831	AIFM1	Apoptosis-inducing factor 1, mitochondrial OS=Homo sapiens GN=AIFM1 PE=1 SV=1	55.4649	66.9	2.85533e+09	2.755e+09	2.93514e+09	2.79506e+09	2.66052e+09	3.00796e+09	2.66575e+09	1.71522e+09	2.76003e+09
Q9BRQ8	AIFM2	Apoptosis-inducing factor 2 OS=Homo sapiens GN=AIFM2 PE=2 SV=1	62.4665	40.5	2.34995e+09	1.22522e+09	1.42054e+09	1.28776e+09	1.36114e+09	1.5081e+09	8.86438e+08	1.51744e+09	1.23241e+09
Q9NVV5	AIG1	Androgen-induced gene 1 protein OS=Homo sapiens GN=AIG1 PE=2 SV=2	6.12245	28.2	147047962	1.44637e+08		63984570		113719769		50547914	93166668
Q12904	AIMP1	Aminoacyl tRNA synthetase complex-interacting multifunctional protein 1 OS=Homo sapiens GN=AIMP1 PE=1 SV=2	68.2692	34.3	4.40184e+08	3.76019e+08	4.12676e+08	5.6935e+08	4.80449e+08	6.80001e+08	6.08735e+08	3.41451e+08	5.96904e+08
Q13155	AIMP2	Aminoacyl tRNA synthetase complex-interacting multifunctional protein 2 OS=Homo sapiens GN=AIMP2 PE=1 SV=2	54.0625	35.3	2.93495e+08	2.52951e+08	2.06454e+08	4.02969e+08	4.26702e+08	4.66689e+08	3.56345e+08	1.79531e+08	3.84535e+08
O00170	AIP	AH receptor-interacting protein OS=Homo sapiens GN=AIP PE=1 SV=2	43.6364	37.6	110117268	108920270	1.48932e+08	140059394	1.21982e+08	1.6197e+08	1.34953e+08	9.14632e+07	156421764
P00568	AK1	Adenylate kinase isoenzyme 1 OS=Homo sapiens GN=AK1 PE=1 SV=3	57.732	21.6	3.02951e+08	1.552e+08	8.88325e+08	1.80445e+08	3.86384e+08	3.86142e+08	7.51548e+08	4.85874e+08	405775846
P54819	AK2	Adenylate kinase 2, mitochondrial OS=Homo sapiens GN=AK2 PE=1 SV=2	74.0586	26.5	2.86086e+09	2.96233e+09	3.06788e+09	3.04538e+09	2.82007e+09	2.945e+09	2.47133e+09	1.59306e+09	3.05821e+09
Q9UIJ7	AK3	GTP:AMP phosphotransferase mitochondrial OS=Homo sapiens GN=AK3 PE=1 SV=4	75.3304	25.6	2586479088	2.49055e+09	2.85881e+09	2225543105	2.24065e+09	2.28508e+09	2.2623e+09	1.53044e+09	2.29563e+09
P27144	AK4	Adenylate kinase isoenzyme 4, mitochondrial OS=Homo sapiens GN=AK3L1 PE=1 SV=1	78.4753	25.3	3.03828e+09	2.87157e+09	3.05273e+09	2.62462e+09	2.76739e+09	2.89459e+09	2.45759e+09	1.62183e+09	2.92407e+09
Q9Y3D8	AK6	Adenylate kinase isoenzyme 6 OS=Homo sapiens GN=AK6 PE=1 SV=1	47.093	20
Q3MIS4	AK9	Uncharacterized protein C6orf224 OS=Homo sapiens GN=C6orf224 PE=2 SV=2	1.51515	115.1						5.25195e+07
Q92667	AKAP1	A kinase anchor protein 1, mitochondrial OS=Homo sapiens GN=AKAP1 PE=1 SV=1	35.3267	97.3	3.19023e+08	8.41212e+08	3.6338e+08	3.12418e+08	271756017	2.92405e+08	3.10039e+08	1.93484e+08	227583177
O43572	AKAP10	A kinase anchor protein 10, mitochondrial OS=Homo sapiens GN=AKAP10 PE=1 SV=2	2.56798	73.8
Q02952	AKAP12	A-kinase anchor protein 12 OS=Homo sapiens GN=AKAP12 PE=1 SV=3	14.1975	191.4	7.63895e+06	1.03207e+07	1.17557e+07	3.31774e+07	2.13994e+07	3.50505e+07	5070579
Q12802	AKAP13	A-kinase anchor protein 13 OS=Homo sapiens GN=AKAP13 PE=1 SV=2	2.80839	307.4	5.42291e+08	6.1801e+08	2.34125e+06	2.6722e+07	8.5009e+06		2.61148e+09		8.71739e+08
Q02040	AKAP17A	Splicing factor, arginine/serine-rich 17A OS=Homo sapiens GN=SFRS17A PE=1 SV=2	15.1079	80.7	22691142	4.96536e+07	5.3569e+07	9.92803e+06	23604429	2.71328e+07	4.58815e+07	1.77382e+07	4.21439e+07
Q9Y2D5	AKAP2	A-kinase anchor protein 2 OS=Homo sapiens GN=AKAP2 PE=1 SV=3	10.7101	94.6			2.81413e+06
O43823	AKAP8	A-kinase anchor protein 8 OS=Homo sapiens GN=AKAP8 PE=1 SV=1	30.4913	76.1	1.44572e+08	1.39674e+08	1.61899e+08	1.16189e+08	1.3278e+08	32434782	1.84958e+08	1.38744e+08	1.63424e+08
Q9ULX6	AKAP8L	A-kinase anchor protein 8-like OS=Homo sapiens GN=AKAP8L PE=1 SV=2	17.9567	71.6	2.12932e+08	2.21418e+08	1.6861e+08	1.11342e+08	1.38166e+08	1.90047e+08	2.13467e+08	1.42796e+08	2.18536e+08
Q99996	AKAP9	A-kinase anchor protein 9 OS=Homo sapiens GN=AKAP9 PE=1 SV=3	1.43186	453.4		1.63843e+08		518720320	267142244
Q9NQ31	AKIP1	Proline-rich protein BCA3 OS=Homo sapiens GN=BCA3 PE=1 SV=2	3.80952	23.1		23995863					5.51598e+07
P14550	AKR1A1	Alcohol dehydrogenase [NADP+] OS=Homo sapiens GN=AKR1A1 PE=1 SV=3	66.1538	36.6	6.56202e+08	6.24523e+08	7.0331e+08	9.54203e+08	7.19665e+08	842267442	856767428	6.02326e+08	8.65509e+08
P15121	AKR1B1	Aldose reductase OS=Homo sapiens GN=AKR1B1 PE=1 SV=3	57.5949	35.8	4.44433e+08	6.66737e+08	7.09608e+08	839319896	597671236	618391324	6.46461e+08	4.63809e+08	5.33827e+08
O60218	AKR1B10	Aldo-keto reductase family 1 member B10 OS=Homo sapiens GN=AKR1B10 PE=1 SV=1	70.5696	36	2.07307e+09	1.7534e+09	2.24736e+09	2.02204e+09	1.89374e+09	2.35955e+09	2.12392e+09	1315927577	2.08072e+09
Q04828	AKR1C1	Aldo-keto reductase family 1 member C1 OS=Homo sapiens GN=AKR1C1 PE=1 SV=1	80.805	36.8	1927668454	2.32048e+09	2.61873e+09	4722422172	2.25545e+09	1.8316e+09	3190765082	1.02505e+09	2282801439
P52895	AKR1C2	Aldo-keto reductase family 1 member C2 OS=Homo sapiens GN=AKR1C2 PE=1 SV=3	80.805	36.7	3.26476e+09	3.36997e+09	4.42494e+09	3.05968e+09	3.5587e+09	4.30326e+09	3.24688e+09	1.8932e+09	4.30976e+09
P42330	AKR1C3	Aldo-keto reductase family 1 member C3 OS=Homo sapiens GN=AKR1C3 PE=1 SV=3	80.805	36.8	1.16485e+09	1.00029e+09	1.26279e+09	3.37645e+09	3.77478e+09	4.0712e+09	4.27173e+09	3.13614e+09	3.34312e+09
P17516	AKR1C4	Aldo-keto reductase family 1 member C4 OS=Homo sapiens GN=AKR1C4 PE=1 SV=2	39.3189	37.1			3.15224e+07	59565736		2.86339e+07			5.85436e+07
P51857	AKR1D1	3-oxo-5-beta-steroid 4-dehydrogenase OS=Homo sapiens GN=AKR1D1 PE=1 SV=1	27.6074	37.4	1.14652e+09	1150274052	4.6776e+08	3.56561e+09	2.35988e+09	1154904280	3.45059e+09	2.51323e+09	1.16176e+09
O43488	AKR7A2	Aflatoxin B1 aldehyde reductase member 2 OS=Homo sapiens GN=AKR7A2 PE=1 SV=3	47.9109	39.6	4.89188e+08	4.53933e+08	5.18591e+08	5.35718e+08	5.15942e+08	5.81875e+08	5.06454e+08	3.40587e+08	6.03736e+08
O95154	AKR7A3	Aflatoxin B1 aldehyde reductase member 3 OS=Homo sapiens GN=AKR7A3 PE=1 SV=2	9.06344	37.2
P31749	AKT1	RAC-alpha serine/threonine-protein kinase OS=Homo sapiens GN=AKT1 PE=1 SV=2	16.25	55.7	55742323		2.42434e+06				1.68159e+07		3.05506e+07
Q96B36	AKT1S1	Proline-rich AKT1 substrate 1 OS=Homo sapiens GN=AKT1S1 PE=1 SV=1	11.7188	27.4	1.20524e+08		1.06755e+08	7.12865e+07	6.03479e+07	8.72689e+07	7.4378e+07	4.39205e+07	1.0239e+08
P31751	AKT2	RAC-beta serine/threonine-protein kinase OS=Homo sapiens GN=AKT2 PE=1 SV=2	13.3056	55.7	3.13138e+07	1.93596e+07	22329294	2.11012e+07	2.76995e+07	3.90639e+07	4.15236e+07	1.77216e+07	5.24342e+07
Q9H8T0	AKTIP	AKT-interacting protein OS=Homo sapiens GN=AKTIP PE=1 SV=1	13.3562	33.1					5.08262e+07	5.96406e+07			5.9694e+07
P13716	ALAD	Delta-aminolevulinic acid dehydratase OS=Homo sapiens GN=ALAD PE=1 SV=1	27.5758	36.3	7.69858e+07	3.55152e+07		7.94508e+06			96353641	4.01752e+06	1.99706e+09
P13196	ALAS1	5-aminolevulinate synthase, nonspecific, mitochondrial OS=Homo sapiens GN=ALAS1 PE=1 SV=2	25.3125	70.5	4.6405e+07	9.21602e+07	3.22362e+07	30621266	17980208	4.507e+07	7.72595e+07	3.7213e+07	2.59799e+07
P02768	ALB	Serum albumin OS=Homo sapiens GN=ALB PE=1 SV=2	72.2496	69.3	2.79879e+09	2.70177e+09	2.92645e+09	3.12346e+09	2.94226e+09	3.0512e+09	2037673851	1.2561e+09	2.36841e+09
Q13740	ALCAM	CD166 antigen OS=Homo sapiens GN=ALCAM PE=1 SV=2	41.681	65.1	7.08925e+08	712732544	6.73354e+08	6.13313e+08	5.11674e+08	5.39523e+08	6.3196e+08	4.26077e+08	5.82194e+08
Q8IZ83	ALDH16A1	Aldehyde dehydrogenase family 16 member A1 OS=Homo sapiens GN=ALDH16A1 PE=1 SV=2	26.4339	85.1	9.28137e+07	9.07552e+07	1.06304e+08	9.3633e+07	5.51083e+07	96975462	9.08952e+07	5.52817e+07	1.12068e+08
P54886	ALDH18A1	Delta-1-pyrroline-5-carboxylate synthetase OS=Homo sapiens GN=ALDH18A1 PE=1 SV=2	69.3082	87.2	5.80922e+09	5.84693e+09	6.71766e+09	5.75515e+09	5.24427e+09	5.64229e+09	5.4107e+09	3.72813e+09	5892639834
P00352	ALDH1A1	Retinal dehydrogenase 1 OS=Homo sapiens GN=ALDH1A1 PE=1 SV=2	67.6647	54.8	3.3967e+09	3295995781	3477242332	3.49148e+09	3.36933e+09	3.62857e+09	3.7913e+09	2.63165e+09	3.74272e+09
O94788	ALDH1A2	Retinal dehydrogenase 2 OS=Homo sapiens GN=ALDH1A2 PE=1 SV=3	4.6332	56.7				1.50232e+09	1395793933		510827528	1257380952	604038472
P30837	ALDH1B1	Aldehyde dehydrogenase X, mitochondrial OS=Homo sapiens GN=ALDH1B1 PE=1 SV=2	66.9246	57.2	4.89175e+09	4.96208e+09	6.34288e+09	5.0455e+09	5.09599e+09	4.19969e+09	4.96412e+09	3.26879e+09	5.37327e+09
Q3SY69	ALDH1L2	Probable 10-formyltetrahydrofolate dehydrogenase ALDH1L2 OS=Homo sapiens GN=ALDH1L2 PE=1 SV=2	7.69231	101.7	5.51952e+06	7.83174e+06	1.18734e+07			7.32538e+06	6.64034e+06	4.97962e+06	8.80326e+06
P05091	ALDH2	Aldehyde dehydrogenase, mitochondrial OS=Homo sapiens GN=ALDH2 PE=1 SV=2	77.7563	56.3	4886033071	4.49667e+09	5.21443e+09	4.64192e+09	4.31483e+09	4.68663e+09	4.41625e+09	2.79281e+09	4.52919e+09
P30838	ALDH3A1	Aldehyde dehydrogenase, dimeric NADP-preferring OS=Homo sapiens GN=ALDH3A1 PE=1 SV=2	6.84327	50.3
P51648	ALDH3A2	Fatty aldehyde dehydrogenase OS=Homo sapiens GN=ALDH3A2 PE=1 SV=1	50.5155	54.8	1.72032e+09	1.68423e+09	1.9022e+09	1.92241e+09	2.04467e+09	1.84274e+09	1.9165e+09	1.13751e+09	1.8046e+09
P43353	ALDH3B1	Aldehyde dehydrogenase family 3 member B1 OS=Homo sapiens GN=ALDH3B1 PE=1 SV=1	5.55556	51.8					4.3841e+06
P30038	ALDH4A1	Delta-1-pyrroline-5-carboxylate dehydrogenase, mitochondrial OS=Homo sapiens GN=ALDH4A1 PE=1 SV=3	65.0089	61.7	2.98313e+09	2.83662e+09	3.33038e+09	3.35083e+09	3.10494e+09	3.32877e+09	2.75919e+09	1.64832e+09	2.85225e+09
P51649	ALDH5A1	Succinate-semialdehyde dehydrogenase, mitochondrial OS=Homo sapiens GN=ALDH5A1 PE=1 SV=2	56.0748	57.2	7.85588e+08	7.22209e+08	8.12193e+08	7.0047e+08	6.60749e+08	651661725	6.94019e+08	4.36968e+08	6.75774e+08
Q02252	ALDH6A1	Methylmalonate-semialdehyde dehydrogenase [acylating], mitochondrial OS=Homo sapiens GN=ALDH6A1 PE=1 SV=2	46.3551	57.8	1.83766e+08	2.20451e+08	2.61268e+08	2.63858e+08	2.52583e+08	257885093	2.15125e+08	1.61425e+08	2.32504e+08
P49419	ALDH7A1	Alpha-aminoadipic semialdehyde dehydrogenase OS=Homo sapiens GN=ALDH7A1 PE=1 SV=4	65.5577	55.3	1.68148e+09	1.72944e+09	2.50947e+09	1.73867e+09	1.79362e+09	1.94123e+09	1.80875e+09	1.20702e+09	2.07313e+09
Q9H2A2	ALDH8A1	Aldehyde dehydrogenase family 8 member A1 OS=Homo sapiens GN=ALDH8A1 PE=1 SV=1	5.13347	53.4
P49189	ALDH9A1	4-trimethylaminobutyraldehyde dehydrogenase OS=Homo sapiens GN=ALDH9A1 PE=1 SV=3	32.3887	53.8	1.27902e+08	1.98885e+08	219335006	2.02288e+08	1.90053e+08	1.95673e+08	1.90088e+08	5.87775e+07	1.99561e+08
P04075	ALDOA	Fructose-bisphosphate aldolase A OS=Homo sapiens GN=ALDOA PE=1 SV=2	85.7143	39.4	1.36563e+10	1.39931e+10	1.42967e+10	1.29022e+10	1.22564e+10	1.30587e+10	1.33928e+10	8.39775e+09	1.28703e+10
P09972	ALDOC	Fructose-bisphosphate aldolase C OS=Homo sapiens GN=ALDOC PE=1 SV=2	58.5165	39.4	1.48198e+09	1.43099e+09	1.63523e+09	1.29252e+09	1.44432e+09	1551552489	1.54477e+09	1.12514e+09	1.50044e+09
Q9BT22	ALG1	Chitobiosyldiphosphodolichol beta-mannosyltransferase OS=Homo sapiens GN=ALG1 PE=1 SV=2	41.1638	52.5	5.01358e+08	5.23628e+08	6.46682e+08	561873866	5.09073e+08	553991857	4.97964e+08	3.71105e+08	5.92006e+08
Q5BKT4	ALG10	Alpha-1,2-glucosyltransferase ALG10-A OS=Homo sapiens GN=ALG10 PE=1 SV=1	7.39958	55.6		42765334	1.39053e+07		1.49694e+07	1.39123e+07	4.66387e+07	55954484	127426290
Q2TAA5	ALG11	Asparagine-linked glycosylation protein 11 homolog OS=Homo sapiens GN=ALG11 PE=1 SV=2	15.4472	55.6	7.84405e+07	8.40544e+07	75333263	5.91138e+07	1.0714e+08	1.04972e+08	8.95941e+07	57291851
Q9BV10	ALG12	Dolichyl-P-Man:Man(7)GlcNAc(2)-PP-dolichyl-alpha-1,6-mannosyltransferase OS=Homo sapiens GN=ALG12 PE=1 SV=1	26.4344	54.6		8.26099e+07	9.78363e+07	4.9881e+07	90437923		4.43802e+07	6.31941e+06	6.57774e+07
Q9NP73	ALG13	UDP-N-acetylglucosamine transferase subunit ALG13 homolog OS=Homo sapiens GN=ALG13 PE=1 SV=1	40.6061	18.2	3.79037e+07	4.23237e+07	51608031	3.18239e+07	3.23059e+07	3.22065e+07	3.468e+07		3.72642e+07
Q96F25	ALG14	UDP-N-acetylglucosamine transferase subunit ALG14 homolog OS=Homo sapiens GN=ALG14 PE=1 SV=1	6.48148	24.1	70020554		92419497	36027528
Q9H553	ALG2	Alpha-1,3-mannosyltransferase ALG2 OS=Homo sapiens GN=ALG2 PE=2 SV=1	33.6538	47.1	1.75193e+08	2.67036e+08	2.80992e+08	2.13878e+08	2.48421e+08	2.21397e+08	2.30448e+08	1.54812e+08	1.96377e+08
Q92685	ALG3	Dolichyl-P-Man:Man(5)GlcNAc(2)-PP-dolichyl mannosyltransferase OS=Homo sapiens GN=ALG3 PE=1 SV=1	6.621	50.1	5.75983e+07	9.76108e+07	51011684	1.10389e+08	9.07354e+07	5.70189e+07	1.2999e+08	5.64615e+07	1.06018e+08
Q9Y673	ALG5	Dolichyl-phosphate beta-glucosyltransferase OS=Homo sapiens GN=ALG5 PE=1 SV=1	41.9753	36.9	316695913	3.03609e+08	2.78122e+08	2.83473e+08	3.11146e+08	3.80544e+08	259004757	1.85503e+08	2.50178e+08
Q9Y672	ALG6	Dolichyl pyrophosphate Man9GlcNAc2 alpha-1,3-glucosyltransferase OS=Homo sapiens GN=ALG6 PE=1 SV=1	6.50888	58.1	6.58328e+07	7.38963e+07	8.91829e+07	26941473			7.68772e+07	66509594	7.84764e+07
Q9BVK2	ALG8	Probable dolichyl pyrophosphate Glc1Man9GlcNAc2 alpha-1,3-glucosyltransferase OS=Homo sapiens GN=ALG8 PE=1 SV=2	6.65399	60	1.62483e+08	1.82932e+08	100982858		101088156		106898855	140989528	330563528
Q9H6U8	ALG9	Alpha-1,2-mannosyltransferase ALG9 OS=Homo sapiens GN=ALG9 PE=1 SV=2	13.4206	69.8	6.57871e+07	8.06685e+07	7.9179e+07	127425717	71917853	8.40319e+07	5.60848e+07	3.91189e+07	5.68208e+07
Q13686	ALKBH1	Alkylated DNA repair protein alkB homolog 1 OS=Homo sapiens GN=ALKBH1 PE=2 SV=2	6.16967	43.8		54252051
Q6NS38	ALKBH2	Alpha-ketoglutarate-dependent dioxygenase alkB homolog 2 OS=Homo sapiens GN=ALKBH2 PE=1 SV=1	18.3908	29.3	3.21295e+07	31632994	1.57568e+07					2.59587e+07
Q6P6C2	ALKBH5	Alkylated DNA repair protein alkB homolog 5 OS=Homo sapiens GN=ALKBH5 PE=1 SV=1	12.0087	51.4	8.09001e+07	88820950	101947384	7.997e+07	9.44657e+07	8.45081e+07	8.2836e+07		1.21457e+08
Q9BT30	ALKBH7	Alkylated DNA repair protein alkB homolog 7 OS=Homo sapiens GN=ALKBH7 PE=2 SV=1	10.8597	24.5
P05186	ALPL	Alkaline phosphatase, tissue-nonspecific isozyme OS=Homo sapiens GN=ALPL PE=1 SV=4	8.20611	57.3
Q96Q42	ALS2	Alsin OS=Homo sapiens GN=ALS2 PE=1 SV=1	3.9831	183.6		1.07263e+08	13866874				6.66396e+06
Q86V81	ALYREF	THO complex subunit 4 OS=Homo sapiens GN=THOC4 PE=1 SV=3	49.4163	26.9	3.30645e+09	3.14687e+09	3.2487e+09	2.39007e+09	2584108357	2.79457e+09	2.99644e+09	2.39709e+09	2.93055e+09
Q9UHK6	AMACR	Alpha-methylacyl-CoA racemase OS=Homo sapiens GN=AMACR PE=1 SV=1	12.8272	42.3	24646374	1.83466e+07	3.83172e+07	15243722	1.50523e+07		17714240	1.83231e+07	2.83171e+07
P02760	AMBP	Protein AMBP OS=Homo sapiens GN=AMBP PE=1 SV=1	50.8523	39	2.93161e+08	4.73347e+08	2.53988e+08	3.21948e+08	4.79734e+08	503545695	2.68505e+08	1.95018e+08	3.03635e+08
Q9C0C7	AMBRA1	Activating molecule in BECN1-regulated autophagy protein 1 OS=Homo sapiens GN=AMBRA1 PE=1 SV=2	3.46687	142.4								7.20113e+06	2.86923e+07
Q9Y303	AMDHD2	Putative N-acetylglucosamine-6-phosphate deacetylase OS=Homo sapiens GN=AMDHD2 PE=2 SV=2	9.53545	43.7	22589122	9301388	3.09353e+07	42658272	3.18529e+07	29365251	35989280	3.31545e+07	3.53121e+07
Q9UKV5	AMFR	Autocrine motility factor receptor, isoform 2 OS=Homo sapiens GN=AMFR PE=1 SV=2	20.0622	72.9	1.35124e+07	2.66755e+07	1.69631e+07	3.58867e+07	36351224	52188840	1.06943e+07		8.95461e+07
Q86WK7	AMIGO3	Amphoterin-induced protein 3 OS=Homo sapiens GN=AMIGO3 PE=2 SV=1	2.97619	55.2
Q6DCA0	AMMECR1L	AMMECR1-like protein OS=Homo sapiens GN=AMMECR1L PE=1 SV=1	4.83871	34.5
Q01433	AMPD2	AMP deaminase 2 OS=Homo sapiens GN=AMPD2 PE=1 SV=2	10.5802	100.6	4.40551e+07	8.50806e+07	8.14608e+07		4.23379e+07	4.05281e+07	4.71205e+07	2.8993e+07
P48728	AMT	Aminomethyltransferase, mitochondrial OS=Homo sapiens GN=AMT PE=1 SV=1	40.9429	43.9	2.83966e+08	1.88126e+08	1.80244e+08	1.37945e+08	2.08225e+08	1.72455e+08	2.89772e+08	1.82388e+08	1.60702e+08
Q86W34	AMZ2	Archaemetzincin-2 OS=Homo sapiens GN=AMZ2 PE=1 SV=1	14.1667	41.2			15592841			1.63997e+07	1.65327e+07		7.69047e+06
Q9H1A4	ANAPC1	Anaphase-promoting complex subunit 1 OS=Homo sapiens GN=ANAPC1 PE=1 SV=1	13.9403	216.4	7.50109e+07	5.85248e+07	7.22241e+07	1.23018e+08	58309170	6.54882e+07	7.05515e+07	3.43196e+07	1.17451e+08
Q9UM13	ANAPC10	Anaphase-promoting complex subunit 10 OS=Homo sapiens GN=ANAPC10 PE=1 SV=1	18.9189	21.2	37459402		4.91322e+07	59711081	3.10231e+07	36243376	58449678
Q9BS18	ANAPC13	Anaphase-promoting complex subunit 13 OS=Homo sapiens GN=ANAPC13 PE=1 SV=1	13.5135	8.5
P60006	ANAPC15	Uncharacterized protein C11orf51 OS=Homo sapiens GN=C11orf51 PE=2 SV=1	8.26446	14.3	1.3091e+07	12672676	11636218	12015069	1.21061e+07	13650173	1.19733e+07	9.38197e+06
Q9UJX6	ANAPC2	Anaphase-promoting complex subunit 2 OS=Homo sapiens GN=ANAPC2 PE=1 SV=1	17.0316	93.8	3.08262e+07	2.86388e+07	2.68154e+07		3.99063e+07	1.85814e+07	3.30227e+07	1.87208e+07	3.56906e+07
Q9UJX5	ANAPC4	Anaphase-promoting complex subunit 4 OS=Homo sapiens GN=ANAPC4 PE=1 SV=2	28.7129	92.1	4.92532e+07	4.7374e+07	5.9814e+07	4.23545e+07	4.73033e+07	5.0503e+07	4.73152e+07	2.40888e+07	5.27878e+07
Q9UJX4	ANAPC5	Anaphase-promoting complex subunit 5 OS=Homo sapiens GN=ANAPC5 PE=1 SV=2	28.3444	85	5.47284e+07	6.50549e+07	9.66017e+07	6.10722e+07	3.43443e+07	7.68894e+07	4.42676e+07	2.00867e+07	5.47254e+07
Q9UJX3	ANAPC7	Anaphase-promoting complex subunit 7 OS=Homo sapiens GN=ANAPC7 PE=1 SV=3	33.2743	63.1	1.12378e+08	1.01744e+08	8.44694e+07	8.90345e+07	7.1107e+07	7.62901e+07	1.01775e+08	5.26046e+07	6.73674e+07
P03950	ANG	Angiogenin OS=Homo sapiens GN=ANG PE=1 SV=1	10.8844	16.5	1.28509e+07
Q5VTE6	ANGEL2	Protein angel homolog 2 OS=Homo sapiens GN=ANGEL2 PE=2 SV=1	9.375	62.3	1.56753e+07		8.28617e+06			1.45584e+07	1.7619e+07		9.3097e+06
Q9UKU9	ANGPTL2	Angiopoietin-related protein 2 OS=Homo sapiens GN=ANGPTL2 PE=2 SV=1	2.83976	57.1
Q6UXH0	ANGPTL8	Hepatocellular carcinoma-associated protein TD26 OS=Homo sapiens GN=UNQ599/PRO1185 PE=2 SV=1	5.55556	22.1
Q01484	ANK2	Ankyrin-2 OS=Homo sapiens GN=ANK2 PE=1 SV=3	1.86035	430		5.99483e+06	1.06889e+07				7.82235e+06	3.25223e+06
Q9P2R3	ANKFY1	Ankyrin repeat and FYVE domain-containing protein 1 OS=Homo sapiens GN=ANKFY1 PE=1 SV=2	25.0642	128.3	6.62097e+07	1.06795e+08	1.21773e+08	7.81787e+08	7.39056e+07	7.93415e+08	1.01242e+08	6.97727e+07	1.01298e+08
Q9HCJ1	ANKH	Progressive ankylosis protein homolog OS=Homo sapiens GN=ANKH PE=1 SV=2	13.4146	54.2	15742485	1.66932e+07		2.57412e+07	1.45845e+07	2.51873e+07	4.81178e+07	7.35996e+06	2.64766e+07
Q8IWZ3	ANKHD1	Ankyrin repeat and KH domain-containing protein 1 OS=Homo sapiens GN=ANKHD1 PE=1 SV=1	10.7789	269.3	5.50654e+07	1.78547e+07	16121630	2.57153e+07	2.9106e+07	3.44326e+07	3.38122e+07		3.26155e+07
Q86XL3	ANKLE2	Ankyrin repeat and LEM domain-containing protein 2 OS=Homo sapiens GN=ANKLE2 PE=1 SV=4	4.69083	104.1	8.15761e+06					9.67175e+06	1.05806e+07	5134293
Q8IV38	ANKMY2	Ankyrin repeat and MYND domain-containing protein 2 OS=Homo sapiens GN=ANKMY2 PE=1 SV=1	4.30839	49.3	1.95921e+07		12947782	12091564	1.24689e+07			9.40422e+06
Q6UB99	ANKRD11	Ankyrin repeat domain-containing protein 11 OS=Homo sapiens GN=ANKRD11 PE=1 SV=2	0.713481	297.8	5.98845e+07	1.68101e+07			3.44271e+07
Q6P6B7	ANKRD16	Ankyrin repeat domain-containing protein 16 OS=Homo sapiens GN=ANKRD16 PE=2 SV=1	4.98615	39.3		1.07257e+07
O75179	ANKRD17	Ankyrin repeat domain-containing protein 17 OS=Homo sapiens GN=ANKRD17 PE=1 SV=3	9.98847	274.1	5.83177e+07	3.07239e+07	4.31622e+07	8.69384e+07	4.89786e+07	5.3011e+07	7.76466e+07	3.63963e+07	7.58878e+07
O15084	ANKRD28	Serine/threonine-protein phosphatase 6 regulatory ankyrin repeat subunit A OS=Homo sapiens GN=ANKRD28 PE=1 SV=4	6.16943	116.5					4.99571e+08
Q8N6D5	ANKRD29	Ankyrin repeat domain-containing protein 29 OS=Homo sapiens GN=ANKRD29 PE=2 SV=2	2.99003	32.4
Q8N283	ANKRD35	Ankyrin repeat domain-containing protein 35 OS=Homo sapiens GN=ANKRD35 PE=2 SV=2	2.0979	109.9					980857908
Q86W74	ANKRD46	Ankyrin repeat domain-containing protein 46 OS=Homo sapiens GN=ANKRD46 PE=1 SV=1	31.0345	26	35074969	45601264	1.74727e+07	7.63587e+07	8.14057e+07		1.95014e+07	5.01076e+07	25837680
Q8NB46	ANKRD52	Serine/threonine-protein phosphatase 6 regulatory ankyrin repeat subunit C OS=Homo sapiens GN=ANKRD52 PE=1 SV=2	1.57993	115		5.85369e+06	8.70033e+06
Q6NXT1	ANKRD54	Ankyrin repeat domain-containing protein 54 OS=Homo sapiens GN=ANKRD54 PE=1 SV=2	9.33333	32.5		2.23169e+07	2.30627e+07				2.47987e+07	1.25578e+07	20786991
Q92625	ANKS1A	Ankyrin repeat and SAM domain-containing protein 1A OS=Homo sapiens GN=ANKS1A PE=1 SV=4	13.8448	123		2.02152e+07	2.06171e+07	18731898		8.76418e+06	1.68323e+07	1.57169e+07	2.52719e+07
Q8N8V4	ANKS4B	Ankyrin repeat and SAM domain-containing protein 4B OS=Homo sapiens GN=ANKS4B PE=2 SV=1	2.3913	51.2
Q9H8Y5	ANKZF1	Ankyrin repeat and zinc finger domain-containing protein 1 OS=Homo sapiens GN=ANKZF1 PE=1 SV=1	9.22865	80.9		9.90005e+06	35082646	235172918	20697397	23322184			31911645
Q9NQW6	ANLN	Actin-binding protein anillin OS=Homo sapiens GN=ANLN PE=1 SV=2	16.9039	124.1	7.90095e+07	7.86117e+07	7.77969e+07	5.60394e+07	4.82949e+07	5.76377e+07	4.64244e+07	2.74188e+07	8.76806e+07
Q9NW15	ANO10	Anoctamin-10 OS=Homo sapiens GN=ANO10 PE=2 SV=2	19.3939	76.3	6.02692e+07	5.22848e+07	6.89529e+07	6.17296e+07	4.73058e+07	6.02342e+07	6.30696e+07	3.83513e+07	4.32856e+07
Q32M45	ANO4	Anoctamin-4 OS=Homo sapiens GN=ANO4 PE=2 SV=1	1.46597	111.4		732661261		740044432	610995129	6.29413e+08	5.85194e+08	2.93911e+08
Q4KMQ2	ANO6	Anoctamin-6 OS=Homo sapiens GN=ANO6 PE=1 SV=2	25.6044	106.1	2.0692e+08	1.13036e+08	2.48285e+08	1.67233e+08	156793678	1.77741e+08	2.05579e+08	1.46498e+08	1.95609e+08
P39687	ANP32A	Acidic leucine-rich nuclear phosphoprotein 32 family member A OS=Homo sapiens GN=ANP32A PE=1 SV=1	49.7992	28.6	1.76844e+09	1.71747e+09	1.24792e+09	1.00056e+09	1.01919e+09	1.66399e+09	1.66824e+09	1.15009e+09	1.82041e+09
Q92688	ANP32B	Acidic leucine-rich nuclear phosphoprotein 32 family member B OS=Homo sapiens GN=ANP32B PE=1 SV=1	31.4741	28.8	1.56602e+09	1.50611e+09	1.82248e+09	1.49855e+09	1.42152e+09	1.57737e+09	1.35363e+09	9.22027e+08	1.70178e+09
Q9BTT0	ANP32E	Acidic leucine-rich nuclear phosphoprotein 32 family member E OS=Homo sapiens GN=ANP32E PE=1 SV=1	42.1642	30.7	7.23365e+08	5.18903e+08	8.39419e+08	5.4784e+08	520326929	6.16799e+08	7.2627e+08	4.15689e+08	639866708
P15144	ANPEP	Aminopeptidase N OS=Homo sapiens GN=ANPEP PE=1 SV=4	44.9845	109.5	1.35972e+09	1.21623e+09	1.40377e+09	1.21229e+09	1309597535	1377912202	1.19321e+09	7.28029e+08	1.2759e+09
Q9BQD7	ANTKMT	Protein FAM173A OS=Homo sapiens GN=FAM173A PE=2 SV=1	22.9787	25.1	2.80161e+07	40534466	3.27408e+07	1.15222e+07	16593780	1.82781e+07		2.03211e+07	27140438
P50995	ANXA11	Annexin A11 OS=Homo sapiens GN=ANXA11 PE=1 SV=1	35.8416	54.4	1.04449e+09	1.02386e+09	1.01162e+09	1.60531e+09	1585268905	1727837555	882130896	5.4826e+08	7.16889e+08
P27216	ANXA13	Annexin A13 OS=Homo sapiens GN=ANXA13 PE=1 SV=3	5.06329	35.4
P07355	ANXA2	Annexin A2 OS=Homo sapiens GN=ANXA2 PE=1 SV=2	64.3068	38.6	4.20962e+08	4.0058e+08	4.96802e+08	3.52639e+08	3.60147e+08	388520708	355889666	1.99048e+08	3.56824e+08
P12429	ANXA3	Annexin A3 OS=Homo sapiens GN=ANXA3 PE=1 SV=3	30.3406	36.4	4.12502e+07	3.58383e+07	4.65125e+07	1.77996e+07	3.16964e+07	1.11775e+08		25932952	2.44149e+07
P09525	ANXA4	Annexin A4 OS=Homo sapiens GN=ANXA4 PE=1 SV=4	66.7712	35.9	2.349e+09	2.40085e+09	2.60826e+09	5.20668e+09	5.15156e+09	5151377341	2.46545e+09	1457470614	2320625056
P08758	ANXA5	Annexin A5 OS=Homo sapiens GN=ANXA5 PE=1 SV=2	69.6875	35.9	2.55077e+09	2426919096	2.86409e+09	3.43848e+09	3.28359e+09	3.20505e+09	2802892900	1.8203e+09	2.70836e+09
P08133	ANXA6	Annexin A6 OS=Homo sapiens GN=ANXA6 PE=1 SV=3	67.7563	75.8	1.39311e+09	1.34781e+09	1.39375e+09	1557145941	1.38351e+09	1.59185e+09	905568797	6.19685e+08	9.04288e+08
P20073	ANXA7	Annexin A7 OS=Homo sapiens GN=ANXA7 PE=1 SV=3	35.4508	52.7	8.65846e+08	8.68596e+08	9.4331e+08	1.28522e+09	1.39679e+09	1.34919e+09	889261607	6.24395e+08	8.98211e+08
Q06278	AOX1	Aldehyde oxidase OS=Homo sapiens GN=AOX1 PE=2 SV=2	10.8371	147.8	2.64033e+07	3.29893e+07	5.19266e+07	2.71207e+07	2.20763e+07	2.79557e+07	3.4783e+07	2.8165e+07	2.87603e+07
Q63HQ0	AP1AR	AP-1 complex-associated regulatory protein OS=Homo sapiens GN=AP1AR PE=1 SV=1	6.95364	34.3					1.1972e+07	7.27852e+06	1.85333e+07
Q10567	AP1B1	AP-1 complex subunit beta-1 OS=Homo sapiens GN=AP1B1 PE=1 SV=2	52.4763	104.6	6.68936e+08	6.84974e+08	7.28252e+08	8.76811e+08	7.0713e+08	8.26478e+08	7.7467e+08	4.00877e+08	7.96055e+08
O43747	AP1G1	AP-1 complex subunit gamma-1 OS=Homo sapiens GN=AP1G1 PE=1 SV=5	28.8321	91.3	3.14849e+08	2.91581e+08	5.26437e+08	2.62904e+08	5.70207e+08	2.92603e+08	2.86318e+08	2.51963e+08	3.30484e+08
O75843	AP1G2	AP-1 complex subunit gamma-like 2 OS=Homo sapiens GN=AP1G2 PE=1 SV=1	22.8025	87.1	9.34319e+07	7.83679e+07	1.08842e+08	1.04838e+08	8.11471e+07	1.07255e+08	8.64172e+07	3.37933e+07	1.1434e+08
Q9BXS5	AP1M1	AP-1 complex subunit mu-1 OS=Homo sapiens GN=AP1M1 PE=1 SV=3	56.5012	48.6	5.36028e+08	4.70471e+08	603307953	4.58142e+08	4.64656e+08	5.0674e+08	4.96963e+08	3.71835e+08	5.1746e+08
P61966	AP1S1	AP-1 complex subunit sigma-1A OS=Homo sapiens GN=AP1S1 PE=1 SV=1	37.3418	18.7	1.60104e+08	1.7107e+08	1.76879e+08	176707204	1.58088e+08	1.62822e+08	1.90539e+08	1.13067e+08	174329929
P56377	AP1S2	AP-1 complex subunit sigma-2 OS=Homo sapiens GN=AP1S2 PE=1 SV=1	25.4777	18.6	1.32473e+07
Q96PC3	AP1S3	AP-1 complex subunit sigma-3 OS=Homo sapiens GN=AP1S3 PE=2 SV=1	16.8831	18.3		9.31436e+07	16092114	9.14683e+07	100402724				105890949
O95782	AP2A1	AP-2 complex subunit alpha-1 OS=Homo sapiens GN=AP2A1 PE=1 SV=3	51.4841	107.5	370794878	3.79227e+08	4.26786e+08	3.77136e+08	3.28287e+08	4.03841e+08	4.15897e+08	2.55951e+08	4.47395e+08
O94973	AP2A2	AP-2 complex subunit alpha-2 OS=Homo sapiens GN=AP2A2 PE=1 SV=2	45.3674	103.9	2.20758e+08	2.0293e+08	2.10874e+08	1.97862e+08	1.89343e+08	2.07598e+08	1.76223e+08	1.30144e+08	2.23412e+08
P63010	AP2B1	AP-2 complex subunit beta OS=Homo sapiens GN=AP2B1 PE=1 SV=1	59.1249	104.5	7.68063e+08	7.45713e+08	8.49625e+08	8.93209e+08	7.42285e+08	8.21539e+08	7.83547e+08	4.31659e+08	7.87795e+08
Q96CW1	AP2M1	AP-2 complex subunit mu OS=Homo sapiens GN=AP2M1 PE=1 SV=2	41.1494	49.6	4.76979e+08	4.76004e+08	526069601	4.2277e+08	389577221	4.63128e+08	4.09233e+08	2.56694e+08	4.66279e+08
P53680	AP2S1	AP-2 complex subunit sigma OS=Homo sapiens GN=AP2S1 PE=1 SV=2	38.0282	17	3.45442e+08	2.56943e+08	3.24646e+08	3.47149e+08	3.20443e+08	3.09867e+08	2.79822e+08	1.77044e+08	3.57607e+08
O00203	AP3B1	AP-3 complex subunit beta-1 OS=Homo sapiens GN=AP3B1 PE=1 SV=3	32.1755	121.2	3.62868e+08	3.49777e+08	3.82371e+08	3.38381e+08	7.82993e+08	8.41575e+08	2.97799e+08	2.2146e+08	2.80151e+08
O14617	AP3D1	AP-3 complex subunit delta-1 OS=Homo sapiens GN=AP3D1 PE=1 SV=1	41.4571	130.1	8.45726e+08	7.9378e+08	3.54603e+08	3.38603e+08	7.47454e+08	804242825	2.72644e+08	3.70704e+08	7.80819e+08
Q9Y2T2	AP3M1	AP-3 complex subunit mu-1 OS=Homo sapiens GN=AP3M1 PE=1 SV=1	57.177	46.9	3.35439e+08	3.1231e+08	3.1222e+08	2.6697e+08	2.61142e+08	3.14752e+08	2.12632e+08	2.02067e+08	2.71251e+08
Q92572	AP3S1	AP-3 complex subunit sigma-1 OS=Homo sapiens GN=AP3S1 PE=1 SV=1	27.9793	21.7	2.76721e+08	2.76813e+08	304671082	2.84654e+08	143091944	1.33261e+08	1.99076e+08	3.45028e+08	2.45553e+08
Q9Y6B7	AP4B1	AP-4 complex subunit beta-1 OS=Homo sapiens GN=AP4B1 PE=1 SV=2	7.57781	83.2	8.25675e+06	1.83271e+07	4.461e+06					3.46627e+06	5.28043e+06
Q9UPM8	AP4E1	AP-4 complex subunit epsilon-1 OS=Homo sapiens GN=AP4E1 PE=1 SV=2	2.37467	127.2		7.88001e+06
O00189	AP4M1	AP-4 complex subunit mu-1 OS=Homo sapiens GN=AP4M1 PE=1 SV=2	3.09051	49.9	2.63479e+07							2.13422e+07
Q9Y587	AP4S1	AP-4 complex subunit sigma-1 OS=Homo sapiens GN=AP4S1 PE=2 SV=1	6.94444	17	2.24408e+07	2.32155e+07	2.9069e+07	25904112	1.70513e+07	2.44688e+07	2.69822e+07	1.71264e+07	2.84692e+07
O43299	AP5Z1	Uncharacterized protein KIAA0415 OS=Homo sapiens GN=KIAA0415 PE=2 SV=2	9.04585	88.5	2.20786e+07	2.25428e+07	2.02702e+07		1.33423e+07		1.78821e+07	1.25695e+07
O14727	APAF1	Apoptotic protease-activating factor 1 OS=Homo sapiens GN=APAF1 PE=1 SV=2	5.6891	141.7	9047410	4.5796e+06		1.96092e+06	5.16491e+06	7.36473e+06			9.95608e+06
P13798	APEH	Acylamino-acid-releasing enzyme OS=Homo sapiens GN=APEH PE=1 SV=4	41.3934	81.2	270041220	2.2342e+08	2.60835e+08	2.97405e+08	2.72446e+08	3.19314e+08	2.49434e+08	1.84955e+08	2.98745e+08
P27695	APEX1	DNA-(apurinic or apyrimidinic site) lyase OS=Homo sapiens GN=APEX1 PE=1 SV=2	70.7547	35.5	4.90287e+09	5.05646e+09	5.33364e+09	4.7479e+09	4.54158e+09	4.70752e+09	4.33981e+09	3.13808e+09	3.98665e+09
Q96BI3	APH1A	Gamma-secretase subunit APH-1A OS=Homo sapiens GN=APH1A PE=1 SV=1	5.28302	29	5.4594e+07		47113776					15607520	4.62901e+07
Q9BZZ5	API5	Apoptosis inhibitor 5 OS=Homo sapiens GN=API5 PE=1 SV=2	50	57.5	9.72621e+08	9.13136e+08	1.03095e+09	8.62939e+08	8.70826e+08	887796009	8.07098e+08	5.35674e+08	7.67131e+08
Q96GX9	APIP	APAF1-interacting protein OS=Homo sapiens GN=APIP PE=1 SV=1	22.7273	27.1	1.07145e+07			67911454	4.71426e+07	5.47639e+07	6.69115e+07	3.23896e+07	53717103
Q06481	APLP2	Amyloid-like protein 2 OS=Homo sapiens GN=APLP2 PE=1 SV=2	36.8283	86.9	2.44833e+08	2.45896e+08	2.52137e+08	3.29668e+08	2.99539e+08	3.39938e+08	2.35342e+08	1.75167e+08	2.44264e+08
Q9HDC9	APMAP	Adipocyte plasma membrane-associated protein OS=Homo sapiens GN=APMAP PE=1 SV=2	55.2885	46.5	4797997734	4.82801e+09	5.35269e+09	4866332180	4.44978e+09	4748560863	3.98077e+09	2.21172e+09	4.38899e+09
P02647	APOA1	Apolipoprotein A-I OS=Homo sapiens GN=APOA1 PE=1 SV=1	60.6742	30.8	1.49885e+09	1.4339e+09	1504636115	1.79717e+09	1666328108	1.80275e+09	1.88578e+09	1.23917e+09	1808985818
P02652	APOA2	Apolipoprotein A-II OS=Homo sapiens GN=APOA2 PE=1 SV=1	60	11.2	381553918	4.03516e+08	503987731	4.76673e+08	4.21245e+08	4.41374e+08	1.47929e+08	1.22361e+08	2.92911e+08
Q6Q788	APOA5	Apolipoprotein A-V OS=Homo sapiens GN=APOA5 PE=1 SV=1	12.2951	41.2	1.2711e+07	1.27055e+07	2.19569e+07				4.86645e+07	2.52755e+07	4.45871e+07
P04114	APOB	Apolipoprotein B-100 OS=Homo sapiens GN=APOB PE=1 SV=1	38.4615	515.2	5.89263e+08	6.57916e+08	3.63366e+08	9.04136e+08	1002562700	1.19026e+09	5.79189e+08	4.23733e+08	650391644
Q9UH17	APOBEC3B	Probable DNA dC->dU-editing enzyme APOBEC-3B OS=Homo sapiens GN=APOBEC3B PE=1 SV=1	24.3455	45.9	2.46369e+07	2.52592e+07	3.52189e+07		1.28157e+07	1.44455e+07	1.90387e+07	1.09185e+07	55479108
Q9NRW3	APOBEC3C	Probable DNA dC->dU-editing enzyme APOBEC-3C OS=Homo sapiens GN=APOBEC3C PE=1 SV=2	36.3158	22.8	1.45428e+08	1.64721e+08	187414013	1.27583e+08	1.14014e+08	8.80851e+07	1.35843e+08	9.29249e+07	1.56909e+08
Q8IUX4	APOBEC3F	DNA dC->dU-editing enzyme APOBEC-3F OS=Homo sapiens GN=APOBEC3F PE=1 SV=3	6.97051	45
P02654	APOC1	Apolipoprotein C-I OS=Homo sapiens GN=APOC1 PE=1 SV=1	24.0964	9.3		21766564	2.98659e+08	88140146	1.41449e+08	1.75215e+08	1.27171e+08	1.13284e+08	90268964
P02656	APOC3	Apolipoprotein C-III OS=Homo sapiens GN=APOC3 PE=1 SV=1	37.3737	10.8	3.84128e+08	2.62663e+08	2.55257e+08	2.70904e+08	255014941	481894209	3.254e+08	301687041	3.11551e+08
P02649	APOE	Apolipoprotein E OS=Homo sapiens GN=APOE PE=1 SV=1	67.8233	36.1	3.3769e+09	3.43471e+09	4.62799e+09	1.85732e+09	1.48094e+09	1.75829e+09	1.5617e+09	1.70087e+09	1.43537e+09
P02749	APOH	Beta-2-glycoprotein 1 OS=Homo sapiens GN=APOH PE=1 SV=3	40.5797	38.3	4.09562e+08	3.99239e+08	3.06127e+08	4.07403e+08	4.15064e+08	3.49558e+08	3.76562e+08	2.50633e+08	3.3598e+08
O14791	APOL1	Apolipoprotein L1 OS=Homo sapiens GN=APOL1 PE=1 SV=5	3.76884	43.9
Q9BQE5	APOL2	Apolipoprotein L2 OS=Homo sapiens GN=APOL2 PE=1 SV=1	22.2552	37.1	1.495e+07	1.34864e+07	2.2627e+07	2.28128e+07	13520495			9.06367e+06	6919650
O95445	APOM	Apolipoprotein M OS=Homo sapiens GN=APOM PE=1 SV=2	39.8936	21.2	1.08426e+08	1.19918e+08	1.38719e+08	1.26673e+08	1.23654e+08	1.38329e+08	8.63611e+07	3.31567e+07	7.69251e+07
Q9BUR5	APOO	Apolipoprotein O OS=Homo sapiens GN=APOO PE=1 SV=1	44.4444	22.3	2.0182e+08	2.15824e+08	2.37347e+08	1.60116e+08	2.34809e+08	2.1454e+08	1.76423e+08	1.54261e+08	1.82938e+08
Q6UXV4	APOOL	Apolipoprotein O-like OS=Homo sapiens GN=APOOL PE=1 SV=1	50.7463	29.1	1.73893e+08	1.00185e+08	2.42001e+08	1.55708e+08	1.4437e+08	2.03872e+08	4.27711e+07	6.60205e+07	1.45428e+08
P05067	APP	Amyloid beta A4 protein OS=Homo sapiens GN=APP PE=1 SV=3	17.9221	86.9	6.38377e+07	97827077	5.63299e+07	5.59647e+07	6.60136e+07	5.69186e+07	4.15538e+07	1.91632e+07	3.17356e+07
Q9UKG1	APPL1	DCC-interacting protein 13-alpha OS=Homo sapiens GN=APPL1 PE=1 SV=1	11.8477	79.6	2.03643e+07	2.20679e+07	3.01279e+07	1.2132e+07	69192275		9.25514e+06	1.52918e+07	1.71715e+07
Q8NEU8	APPL2	DCC-interacting protein 13-beta OS=Homo sapiens GN=APPL2 PE=1 SV=3	2.10843	74.4
P07741	APRT	Adenine phosphoribosyltransferase OS=Homo sapiens GN=APRT PE=1 SV=2	73.3333	19.6	6.81413e+08	6.03879e+08	7.20303e+08	4.959e+08	5.04058e+08	5.61567e+08	6.31645e+08	4.57275e+08	5.03605e+08
Q7Z2E3	APTX	Aprataxin OS=Homo sapiens GN=APTX PE=1 SV=2	17.1348	40.7	4.95709e+07		8.08016e+07	1.1014e+08	91983447	7.38251e+07	7.28499e+07	4.9798e+07	7.67083e+07
Q8NBQ7	AQP11	Aquaporin-11 OS=Homo sapiens GN=AQP11 PE=2 SV=1	2.95203	30.2	9.04997e+06	8.88355e+06		8.05129e+06	8.2304e+06	8.26198e+06		5073983	1.98472e+07
O60306	AQR	Intron-binding protein aquarius OS=Homo sapiens GN=AQR PE=1 SV=4	36.2963	171.2	5.62247e+08	9.98561e+08	411992627	6.34158e+08	5.92051e+08	6.26849e+08	278037981	3.8493e+08	685324274
P10398	ARAF	Serine/threonine-protein kinase A-Raf OS=Homo sapiens GN=ARAF PE=1 SV=2	15.5116	67.5	2.06996e+07	3.99465e+07	2.28288e+07	3.29531e+07	44188632	5.11805e+07	1.77001e+07	1.00614e+07	54745294
Q96P48	ARAP1	Arf-GAP with Rho-GAP domain, ANK repeat and PH domain-containing protein 1 OS=Homo sapiens GN=ARAP1 PE=1 SV=3	21.5862	162.1	1.11855e+08	1.08747e+08	1.34034e+08	1.22187e+08	1.06792e+08	1.27915e+08	1.44255e+08	8.45268e+07	1.00827e+08
P48444	ARCN1	Coatomer subunit delta OS=Homo sapiens GN=ARCN1 PE=1 SV=1	51.6634	57.2	1.13113e+09	9.48029e+08	1.05929e+09	9.54767e+08	8.77959e+08	9.892e+08	1126832277	5.46726e+08	1.09832e+09
P84077	ARF1	ADP-ribosylation factor 1 OS=Homo sapiens GN=ARF1 PE=1 SV=2	75.1381	20.7	1.60038e+08	187192561	1.52463e+08	1.88787e+08	9.48748e+07	5.25371e+07	1.27066e+08		1.52794e+08
P61204	ARF3	ADP-ribosylation factor 3 OS=Homo sapiens GN=ARF3 PE=1 SV=2	69.6133	20.6
P18085	ARF4	ADP-ribosylation factor 4 OS=Homo sapiens GN=ARF4 PE=1 SV=3	80	20.5	3.08927e+09	2.91495e+09	3.23569e+09	2.60646e+09	2.63982e+09	2.67132e+09	2.71543e+09	1.73093e+09	2.89595e+09
P84085	ARF5	ADP-ribosylation factor 5 OS=Homo sapiens GN=ARF5 PE=1 SV=2	76.1111	20.5	321491822	3.25544e+08	3.11089e+08	2.95156e+08	2.84986e+08	3.10532e+08	4.27836e+08	2.86068e+08	3.52133e+08
P62330	ARF6	ADP-ribosylation factor 6 OS=Homo sapiens GN=ARF6 PE=1 SV=2	64.5714	20.1	5.92622e+08	5.80459e+08	6.58438e+08	5.87135e+08	5.27974e+08	5.99501e+08	4.85694e+08	3.2448e+08	6.19189e+08
Q8N6T3	ARFGAP1	ADP-ribosylation factor GTPase-activating protein 1 OS=Homo sapiens GN=ARFGAP1 PE=1 SV=2	57.6355	44.6	3.17459e+08	3.23884e+08	3.38128e+08	349586265	3.79586e+08	3.07554e+08	4.27543e+08	2.56564e+08	4.11993e+08
Q8N6H7	ARFGAP2	ADP-ribosylation factor GTPase-activating protein 2 OS=Homo sapiens GN=ARFGAP2 PE=1 SV=1	21.3052	56.7	3.68907e+07	5.87476e+07	4.30391e+07	6.33844e+07	6.28453e+07	32235367	6.56542e+07	5.46737e+07	5.58188e+07
Q9NP61	ARFGAP3	ADP-ribosylation factor GTPase-activating protein 3 OS=Homo sapiens GN=ARFGAP3 PE=1 SV=1	12.4031	56.9	5.72107e+07	101054751	1.20742e+08	5.71135e+07	5.87662e+07	66124348	5.35551e+07	5.12655e+07	6.35553e+07
Q9Y6D6	ARFGEF1	Brefeldin A-inhibited guanine nucleotide-exchange protein 1 OS=Homo sapiens GN=ARFGEF1 PE=1 SV=2	12.7637	208.6	1.01365e+07	9.13852e+06	8.7472e+06	9.02329e+06		2.98725e+07	1.22548e+07	3.09613e+06
Q9Y6D5	ARFGEF2	Brefeldin A-inhibited guanine nucleotide-exchange protein 2 OS=Homo sapiens GN=ARFGEF2 PE=1 SV=3	33.1653	201.9	2.15474e+08	2.41943e+08	2.37519e+08	1.73863e+08	1.81897e+08	1.91667e+08	1.79571e+08	1.28863e+08	1.92474e+08
Q5TH69	ARFGEF3	Brefeldin A-inhibited guanine nucleotide-exchange protein 3 OS=Homo sapiens GN=ARFGEF3 PE=1 SV=3	3.35324	240.5	1.15825e+07	5512801
P53367	ARFIP1	Arfaptin-1 OS=Homo sapiens GN=ARFIP1 PE=1 SV=2	44.7721	41.7	1.01506e+08	1.17376e+08	1.49499e+08	5.08211e+07	5.39111e+07	8.74825e+07	1.3157e+08	9.43298e+07	1.30429e+08
P53365	ARFIP2	Arfaptin-2 OS=Homo sapiens GN=ARFIP2 PE=1 SV=1	21.7009	37.8	87521850	9.4988e+07	114727957	99181068	85233718	92862008	5.57804e+07	3.45483e+07	1.15386e+08
Q13795	ARFRP1	ADP-ribosylation factor-related protein 1 OS=Homo sapiens GN=ARFRP1 PE=1 SV=1	50.7463	22.6	1.29674e+08	1.14064e+08	1.56875e+08	1.27697e+08	1.35316e+08	1.46928e+08	1.07698e+08	6.7308e+07	9.1069e+07
P78540	ARG2	Arginase-2, mitochondrial OS=Homo sapiens GN=ARG2 PE=1 SV=1	60.452	38.6	4.56005e+08	4.08276e+08	4.20787e+08	4.55674e+08	5.34459e+08	5.59519e+08	5.03137e+08	3.17507e+08	4.60783e+08
Q9NWB6	ARGLU1	Arginine and glutamate-rich protein 1 OS=Homo sapiens GN=ARGLU1 PE=1 SV=1	5.86081	33.2							5.07658e+07	6.67644e+07
Q07960	ARHGAP1	Rho GTPase-activating protein 1 OS=Homo sapiens GN=ARHGAP1 PE=1 SV=1	64.4647	50.4	9.08475e+08	8.43746e+08	9.6592e+08	8.05849e+08	7.0697e+08	7.99784e+08	8.58896e+08	5.49586e+08	9.53226e+08
Q6P4F7	ARHGAP11A	Rho GTPase-activating protein 11A OS=Homo sapiens GN=ARHGAP11A PE=1 SV=2	1.75953	113.8							1.40035e+07		22860963
Q8IWW6	ARHGAP12	Rho GTPase-activating protein 12 OS=Homo sapiens GN=ARHGAP12 PE=1 SV=1	25.8865	96.2	9.82287e+07	5.68213e+07	7.90321e+07	3.54821e+07	8.27535e+07	8.7081e+07	8.3217e+07	3.39313e+07	83199019
Q68EM7	ARHGAP17	Rho GTPase-activating protein 17 OS=Homo sapiens GN=ARHGAP17 PE=1 SV=1	39.0465	95.4	3.82796e+08	3.6112e+08	427582908	418755138	3.70061e+08	3.79756e+08	3.14596e+08	1.0589e+08	3.48183e+08
Q8N392	ARHGAP18	Rho GTPase-activating protein 18 OS=Homo sapiens GN=ARHGAP18 PE=1 SV=2	56.8627	74.9	2.33365e+08	2.68516e+08	2.35613e+08	2.11738e+08	2.22862e+08	1.98588e+08	2.28658e+08	159051672	246550322
Q14CB8	ARHGAP19	Rho GTPase-activating protein 19 OS=Homo sapiens GN=ARHGAP19 PE=1 SV=1	2.22672	55.7
Q9P2F6	ARHGAP20	Rho GTPase-activating protein 20 OS=Homo sapiens GN=ARHGAP20 PE=2 SV=2	0.587741	132.5
Q5T5U3	ARHGAP21	Rho GTPase-activating protein 21 OS=Homo sapiens GN=ARHGAP21 PE=1 SV=1	0.919775	217.2
Q9UNA1	ARHGAP26	Rho GTPase-activating protein 26 OS=Homo sapiens GN=ARHGAP26 PE=1 SV=1	4.1769	92.2
Q6ZUM4	ARHGAP27	Rho GTPase-activating protein 27 OS=Homo sapiens GN=ARHGAP27 PE=2 SV=2	2.81215	98.3			8.60335e+06
Q52LW3	ARHGAP29	Rho GTPase-activating protein 29 OS=Homo sapiens GN=ARHGAP29 PE=1 SV=2	0.713719	142
Q9NRY4	ARHGAP35	Glucocorticoid receptor DNA-binding factor 1 OS=Homo sapiens GN=GRLF1 PE=1 SV=2	29.61	172.1	1.25688e+08	1.20705e+08	1.29154e+08	9.11032e+07	9.88943e+07	1.12616e+08	1.26614e+08	7.95875e+07	1.23261e+08
Q92619	ARHGAP45	Minor histocompatibility protein HA-1 OS=Homo sapiens GN=HMHA1 PE=1 SV=2	4.13732	124.5		27478245				6840295
Q13017	ARHGAP5	Rho GTPase-activating protein 5 OS=Homo sapiens GN=ARHGAP5 PE=1 SV=2	24.2344	172.4	4.75587e+07	4.17186e+07	4.99189e+07	9.37422e+07	9.54591e+07	7.58222e+07	5.91421e+07	2.31032e+07	6.18461e+07
P52565	ARHGDIA	Rho GDP-dissociation inhibitor 1 OS=Homo sapiens GN=ARHGDIA PE=1 SV=3	71.0784	23.2	1232565080	1.24216e+09	1.33165e+09	1.29601e+09	1.58645e+09	1.54731e+09	1.49582e+09	9.41192e+08	1.35111e+09
Q92888	ARHGEF1	Rho guanine nucleotide exchange factor 1 OS=Homo sapiens GN=ARHGEF1 PE=1 SV=2	18.3114	102.4	6.13836e+07	8.16016e+07	1.04787e+08	9.28986e+07	6.72979e+07	6.60013e+07	9.18593e+07	3.81246e+07	6.57438e+07
Q9HCE6	ARHGEF10L	Rho guanine nucleotide exchange factor 10-like protein OS=Homo sapiens GN=ARHGEF10L PE=1 SV=2	26.1923	140.3	1.52821e+08	7.78478e+07	164371431	8.97587e+07	1.07601e+08	1.14011e+08	1.08648e+08	4.74358e+07	1.10462e+08
O15085	ARHGEF11	Rho guanine nucleotide exchange factor 11 OS=Homo sapiens GN=ARHGEF11 PE=1 SV=1	0.788436	167.6
Q9NZN5	ARHGEF12	Rho guanine nucleotide exchange factor 12 OS=Homo sapiens GN=ARHGEF12 PE=1 SV=1	3.56218	173.1
Q5VV41	ARHGEF16	Rho guanine nucleotide exchange factor 16 OS=Homo sapiens GN=ARHGEF16 PE=1 SV=1	21.1566	80.1		2.88774e+07	3.97845e+07		8.34091e+06	1.07031e+07	2.13749e+07	3.88004e+07	1.353e+07
Q92974	ARHGEF2	Rho guanine nucleotide exchange factor 2 OS=Homo sapiens GN=ARHGEF2 PE=1 SV=4	26.7748	111.5	6.60525e+07	5.12578e+07	5.40693e+07	6.84974e+07	5.5257e+07	6.53779e+07	37363831	1.27104e+07	3.82165e+07
Q8N1W1	ARHGEF28	Rho-guanine nucleotide exchange factor OS=Homo sapiens GN=RGNEF PE=1 SV=2	3.40176	191.8			6.77825e+06			7.75776e+06			2.55812e+06
Q8TER5	ARHGEF40	Protein SOLO OS=Homo sapiens GN=SOLO PE=1 SV=2	13.2324	164.5	3.91353e+07	2.37619e+07		6.22929e+07	1.83202e+07	5.13026e+07	1.80875e+07	13631798	4.52938e+07
Q12774	ARHGEF5	Rho guanine nucleotide exchange factor 5 OS=Homo sapiens GN=ARHGEF5 PE=1 SV=3	1.56544	176.7	2.41579e+07	1.75629e+07		1.76361e+07	1.80891e+07	26515676	2.11998e+07	1.13088e+07
Q14155	ARHGEF7	Rho guanine nucleotide exchange factor 7 OS=Homo sapiens GN=ARHGEF7 PE=1 SV=2	7.34745	90		44247599	5.90547e+07	5.79089e+07	42328412	3.46274e+07			50891702
O14497	ARID1A	AT-rich interactive domain-containing protein 1A OS=Homo sapiens GN=ARID1A PE=1 SV=3	20.2626	241.9	1.52753e+08	1.57614e+08	1.79648e+08	1.4059e+08	1.33723e+08	1.34965e+08	1.54603e+08	7.78365e+07	2.1503e+08
Q8NFD5	ARID1B	AT-rich interactive domain-containing protein 1B OS=Homo sapiens GN=ARID1B PE=1 SV=2	6.8873	236		1.96222e+07	1.15594e+07	34567893		9.17756e+06	3.68031e+07	67974991	3.26014e+07
Q68CP9	ARID2	AT-rich interactive domain-containing protein 2 OS=Homo sapiens GN=ARID2 PE=1 SV=2	1.52589	197.3	7.24046e+06		2.25723e+07
Q99856	ARID3A	AT-rich interactive domain-containing protein 3A OS=Homo sapiens GN=ARID3A PE=1 SV=2	29.8482	62.9	3.85924e+08	3.2465e+08	3.87251e+08	356629923	3.18078e+08	3.02506e+08	2.66635e+08	1.82408e+08	2.72144e+08
Q8IVW6	ARID3B	AT-rich interactive domain-containing protein 3B OS=Homo sapiens GN=ARID3B PE=1 SV=2	4.99109	60.6
P29374	ARID4A	AT-rich interactive domain-containing protein 4A OS=Homo sapiens GN=ARID4A PE=1 SV=3	3.5004	142.7	1.17621e+07	8698638	9.93892e+06
Q4LE39	ARID4B	AT-rich interactive domain-containing protein 4B OS=Homo sapiens GN=ARID4B PE=1 SV=2	5.4878	147.7		2.01832e+08			155321150			7.60099e+06
Q14865	ARID5B	AT-rich interactive domain-containing protein 5B OS=Homo sapiens GN=ARID5B PE=1 SV=3	0.925926	132.3
Q9Y4X5	ARIH1	Protein ariadne-1 homolog OS=Homo sapiens GN=ARIH1 PE=1 SV=2	6.64273	64.1							35927922	1.88877e+07	3.47706e+07
O95376	ARIH2	Protein ariadne-2 homolog OS=Homo sapiens GN=ARIH2 PE=1 SV=1	18.6613	57.8	5.31864e+06	2.15473e+07	1.79981e+07	39644614	4.22204e+07	2.16478e+07	9.88736e+06		1.77394e+07
P40616	ARL1	ADP-ribosylation factor-like protein 1 OS=Homo sapiens GN=ARL1 PE=1 SV=1	61.8785	20.4	7.15223e+08	5.90911e+08	7.76567e+08	7.03026e+08	6.26424e+08	7.21429e+08	7.04012e+08	4.13468e+08	7.61525e+08
Q8N8R7	ARL14EP	Uncharacterized protein C11orf46 OS=Homo sapiens GN=C11orf46 PE=2 SV=1	6.15385	29.3
Q9NXU5	ARL15	ADP-ribosylation factor-like protein 15 OS=Homo sapiens GN=ARL15 PE=1 SV=1	33.3333	22.9			43640768	30933768			3.3658e+07		3.52577e+07
P36404	ARL2	ADP-ribosylation factor-like protein 2 OS=Homo sapiens GN=ARL2 PE=1 SV=4	48.3696	20.9	1.85894e+08	1.77012e+08	1.56648e+08	1.97307e+08	1.09244e+08	1.01225e+08	1.13473e+08	9.6404e+07	1.15978e+08
Q9Y2Y0	ARL2BP	ADP-ribosylation factor-like protein 2-binding protein OS=Homo sapiens GN=ARL2BP PE=1 SV=1	42.3313	18.8	9.71316e+07	58063627	8.13524e+07	7.8449e+07	6.32648e+07	8.23267e+07	8.05666e+07	1.985e+07	9.35637e+07
P36405	ARL3	ADP-ribosylation factor-like protein 3 OS=Homo sapiens GN=ARL3 PE=1 SV=2	49.4505	20.4	1.07288e+08	1.11021e+08	141566242	4.33143e+07	8.05743e+07		1.05543e+08		1.02214e+08
Q9Y689	ARL5A	ADP-ribosylation factor-like protein 5A OS=Homo sapiens GN=ARL5A PE=1 SV=1	22.905	20.7	5.21722e+07	6.21855e+06	8.52577e+07		75791054		11137279
Q96KC2	ARL5B	ADP-ribosylation factor-like protein 5B OS=Homo sapiens GN=ARL5B PE=1 SV=1	45.2514	20.4	115668057	8.43789e+07	1.1513e+08	2.0094e+08	1.88962e+08	1.91444e+08	1.16166e+08	5.39309e+07	2.18534e+08
Q15041	ARL6IP1	ADP-ribosylation factor-like protein 6-interacting protein 1 OS=Homo sapiens GN=ARL6IP1 PE=1 SV=2	22.6601	23.3	2.5579e+08	8.71849e+07	1.36184e+08	1.25456e+08	1.55551e+08	141353965	1.2843e+08	1.78789e+08	1.40243e+08
Q66PJ3	ARL6IP4	ADP-ribosylation factor-like protein 6-interacting protein 4 OS=Homo sapiens GN=ARL6IP4 PE=1 SV=1	13.6111	38.4	1.61069e+08	1.24271e+08	1.75128e+08	1.02702e+08	4.90671e+07	4.89519e+07	154358233	1.06696e+08	1.31413e+08
O75915	ARL6IP5	PRA1 family protein 3 OS=Homo sapiens GN=ARL6IP5 PE=1 SV=1	21.2766	21.6	5.88975e+08	5.23771e+08	5.81068e+08	5.67427e+08	5.0768e+08	5.52826e+08	6.54384e+08	4.46811e+08	6.97876e+08
Q8N6S5	ARL6IP6	ADP-ribosylation factor-like protein 6-interacting protein 6 OS=Homo sapiens GN=ARL6IP6 PE=1 SV=1	5.30973	24.7	239957694						241959844
Q96BM9	ARL8A	ADP-ribosylation factor-like protein 8A OS=Homo sapiens GN=ARL8A PE=1 SV=1	61.2903	21.4	5.59199e+08		2.86527e+08	4.25812e+07	644224852	3.39748e+08	4.99214e+08	262465088	655811863
Q9NVJ2	ARL8B	ADP-ribosylation factor-like protein 8B OS=Homo sapiens GN=ARL8B PE=1 SV=1	72.043	21.5	3.09818e+08	2.6551e+08	4.27754e+08	2.04408e+08	4.31378e+08	4.38993e+08	3.52919e+08	2.39463e+08	4.31437e+08
Q9NVT9	ARMC1	Armadillo repeat-containing protein 1 OS=Homo sapiens GN=ARMC1 PE=1 SV=1	39.3617	31.3	1.02034e+08	9.21465e+07	1.37272e+08	1.32444e+08	1.29499e+08	9.05028e+07	6.87515e+07	5.58535e+07	150650652
Q8N2F6	ARMC10	Armadillo repeat-containing protein 10 OS=Homo sapiens GN=ARMC10 PE=1 SV=1	17.4927	37.5	4.89717e+07	3.64073e+07	2.38435e+07				9.21081e+07		2.01973e+07
Q96C12	ARMC5	Armadillo repeat-containing protein 5 OS=Homo sapiens GN=ARMC5 PE=2 SV=2	1.39037	97.6				7.72476e+06	4.65387e+06	6.71799e+06			6.71252e+06
Q6NXE6	ARMC6	Armadillo repeat-containing protein 6 OS=Homo sapiens GN=ARMC6 PE=1 SV=2	24.7505	54.1	2.30317e+07	5.92269e+07		93103582	8.73733e+07	96786424	6.95688e+07	6.02921e+07	8.20892e+07
Q8IUR7	ARMC8	Armadillo repeat-containing protein 8 OS=Homo sapiens GN=ARMC8 PE=1 SV=2	13.2244	75.5	1.0852e+07		1.65306e+07		2.66627e+07	2.0938e+07			1.05967e+08
Q7Z3E5	ARMC9	LisH domain-containing protein ARMC9 OS=Homo sapiens GN=ARMC9 PE=2 SV=2	3.18237	91.7							8.30467e+06		1.13445e+07
Q9P291	ARMCX1	Armadillo repeat-containing X-linked protein 1 OS=Homo sapiens GN=ARMCX1 PE=2 SV=1	3.97351	49.2					4.77838e+07
Q9UH62	ARMCX3	Armadillo repeat-containing X-linked protein 3 OS=Homo sapiens GN=ARMCX3 PE=1 SV=1	47.7573	42.5	2.12007e+08	1.84773e+08	2.08603e+08	1.88198e+08	1.72171e+08	1.77625e+08	1.98396e+08	1.13747e+08	1.30154e+08
Q6P1M9	ARMCX5	Armadillo repeat-containing X-linked protein 5 OS=Homo sapiens GN=ARMCX5 PE=2 SV=1	2.32975	62.3
Q5T2E6	ARMH3	UPF0668 protein C10orf76 OS=Homo sapiens GN=C10orf76 PE=2 SV=1	21.7707	78.7	9.11983e+07	9.01621e+07	1.0646e+08	5.47267e+07	4.75509e+07	7.50408e+07	9.57154e+07	4.36685e+07	8.33086e+07
Q9H993	ARMT1	UPF0364 protein C6orf211 OS=Homo sapiens GN=C6orf211 PE=1 SV=1	36.7347	51.1	2.35645e+08	2.46262e+08	2.52456e+08	2.54135e+08	2.36267e+08	2.56537e+08	2.31324e+08	1.40425e+08	199169001
Q92747	ARPC1A	Actin-related protein 2/3 complex subunit 1A OS=Homo sapiens GN=ARPC1A PE=1 SV=2	45.1351	41.5	7.62935e+07	9.11462e+07	9.58518e+07	8.2661e+07	6.42616e+07	7.85324e+07	9.96754e+07	4.1872e+07	8.58453e+07
O15143	ARPC1B	Actin-related protein 2/3 complex subunit 1B OS=Homo sapiens GN=ARPC1B PE=1 SV=3	46.2366	40.9	7.43795e+08	7.55685e+08	7.48633e+08	6.29675e+08	4.65993e+08	6.20057e+08	7.22138e+08	4.75169e+08	6.0989e+08
O15144	ARPC2	Actin-related protein 2/3 complex subunit 2 OS=Homo sapiens GN=ARPC2 PE=1 SV=1	76.6667	34.3	1.08951e+09	1.07453e+09	1.23336e+09	9.43037e+08	9.27069e+08	888141610	1029988923	5.63606e+08	1.08507e+09
O15145	ARPC3	Actin-related protein 2/3 complex subunit 3 OS=Homo sapiens GN=ARPC3 PE=1 SV=3	38.764	20.5	6.68292e+08	6.9963e+08	5.5916e+08	7.30578e+08	425668023	7.22361e+08	6.76843e+08	5.19918e+08	7.09495e+08
P59998	ARPC4	Actin-related protein 2/3 complex subunit 4 OS=Homo sapiens GN=ARPC4 PE=1 SV=3	71.4286	19.7	1.22778e+09	1.24253e+09	1.43863e+09	1.20381e+09	1.13652e+09	1.1575e+09	1.09283e+09	7.39593e+08	1.37107e+09
O15511	ARPC5	Actin-related protein 2/3 complex subunit 5 OS=Homo sapiens GN=ARPC5 PE=1 SV=3	61.5894	16.3	5.13318e+08	6.85872e+08	8.5027e+08	6.49691e+08	6.37518e+08	7.33395e+08	6.83607e+08	5.16092e+08	3.90502e+08
Q9BPX5	ARPC5L	Actin-related protein 2/3 complex subunit 5-like protein OS=Homo sapiens GN=ARPC5L PE=1 SV=1	58.8235	16.9	1.91643e+08	3.27443e+08	2.98435e+08	2.39592e+08	2.07837e+08	1.70775e+08	3.04332e+08	2.05691e+08	2.94e+08
P56211	ARPP19	cAMP-regulated phosphoprotein 19 OS=Homo sapiens GN=ARPP19 PE=1 SV=2	50	12.3	5.02291e+07	5.61091e+07	74986081	120217867	1.15376e+08	6.36655e+07	1.33286e+08	4.85034e+07	1.36346e+08
P36575	ARR3	Arrestin-C OS=Homo sapiens GN=ARR3 PE=1 SV=2	6.18557	42.8
P49407	ARRB1	Beta-arrestin-1 OS=Homo sapiens GN=ARRB1 PE=1 SV=2	11.9617	47	3.20631e+07	3.69305e+07	32328574		5.87312e+07	6.97256e+07		3.04033e+07	5.94288e+07
P32121	ARRB2	Beta-arrestin-2 OS=Homo sapiens GN=ARRB2 PE=1 SV=2	23.9609	46.1	3.5973e+07	3.91121e+07	5.24849e+07	3.4359e+07	4.39074e+07	42263585	6417380	2.23247e+07	4.08609e+07
P15289	ARSA	Arylsulfatase A OS=Homo sapiens GN=ARSA PE=1 SV=3	19.3294	53.6	1.88764e+08	183224126	202814508	1.67859e+08	1.94833e+08	1.82424e+08	1.85065e+08	1.30134e+08	2.09383e+08
P15848	ARSB	Arylsulfatase B OS=Homo sapiens GN=ARSB PE=1 SV=1	18.3865	59.6	8.64598e+07	6.15273e+07	1.04721e+08	5.91542e+07	8.65765e+07	9.58133e+07	1.06795e+08	3.91765e+07	9.69544e+07
P51689	ARSD	Arylsulfatase D OS=Homo sapiens GN=ARSD PE=1 SV=2	6.23946	64.8
P51690	ARSL	Arylsulfatase E OS=Homo sapiens GN=ARSE PE=1 SV=2	26.3158	65.6	1.74745e+08	1.85554e+08	2.14139e+08	1.63147e+08	1.61583e+08	1.66024e+08	1.80751e+08	1.25255e+08	1.95334e+08
Q9H2C2	ARV1	Protein ARV1 OS=Homo sapiens GN=ARV1 PE=2 SV=1	7.38007	31
O00192	ARVCF	Armadillo repeat protein deleted in velo-cardio-facial syndrome OS=Homo sapiens GN=ARVCF PE=1 SV=1	16.4241	104.6	2.85678e+07	3.25697e+07	4.70353e+07	3.40035e+07	2.62956e+07	2.73714e+07	3.47315e+07	1.91316e+07	3.16034e+07
Q9HBK9	AS3MT	Arsenite methyltransferase OS=Homo sapiens GN=AS3MT PE=1 SV=3	17.8667	41.7	1.72075e+07		5.47595e+06		5.0292e+06	7.40101e+06			9.21401e+06
Q13510	ASAH1	Acid ceramidase OS=Homo sapiens GN=ASAH1 PE=1 SV=5	42.0253	44.6	7.94471e+08	7.5892e+08	8.51419e+08	8.92906e+08	8.55465e+08	8.41351e+08	7.67786e+08	5.56581e+08	8.30128e+08
Q9ULH1	ASAP1	Arf-GAP with SH3 domain, ANK repeat and PH domain-containing protein 1 OS=Homo sapiens GN=ASAP1 PE=1 SV=3	2.56864	125.4
O43150	ASAP2	Arf-GAP with SH3 domain, ANK repeat and PH domain-containing protein 2 OS=Homo sapiens GN=ASAP2 PE=1 SV=3	2.7833	111.6				6.64576e+06		5624186
Q8TDY4	ASAP3	Arf-GAP with SH3 domain, ANK repeat and PH domain-containing protein 3 OS=Homo sapiens GN=ASAP3 PE=1 SV=1	3.87597	99.1	2.57306e+07	20303671		13924755	1.57109e+07			1.74775e+07	1.75011e+07
Q9Y575	ASB3	Ankyrin repeat and SOCS box protein 3 OS=Homo sapiens GN=ASB3 PE=1 SV=1	2.12355	57.7							1.01266e+07
Q9NWX5	ASB6	Ankyrin repeat and SOCS box protein 6 OS=Homo sapiens GN=ASB6 PE=1 SV=1	2.3753	47.1				4.41435e+08			359665098
Q96DX5	ASB9	Ankyrin repeat and SOCS box protein 9 OS=Homo sapiens GN=ASB9 PE=1 SV=1	11.2245	31.8
Q8N9N2	ASCC1	Activating signal cointegrator 1 complex subunit 1 OS=Homo sapiens GN=ASCC1 PE=1 SV=1	4.75	45.5	94397970	8.03767e+07	1.06005e+08	38131368			1.08089e+08		1.06042e+08
Q9H1I8	ASCC2	Activating signal cointegrator 1 complex subunit 2 OS=Homo sapiens GN=ASCC2 PE=1 SV=3	14.7952	86.3	2.48538e+07	3.46556e+07	3.92911e+07	4.48037e+07	4.41342e+07	4.48715e+07	5.24787e+07	2.13573e+07	3.68343e+07
Q8N3C0	ASCC3	Activating signal cointegrator 1 complex subunit 3 OS=Homo sapiens GN=ASCC3 PE=1 SV=3	27.8383	251.3	9.17811e+07	1.06748e+08	1.1516e+08	1.19209e+08	1.06118e+08	8.80354e+07	1.01055e+08	6.09315e+07	8.81585e+07
Q9Y294	ASF1A	Histone chaperone ASF1A OS=Homo sapiens GN=ASF1A PE=1 SV=1	44.1176	23	1.57325e+08	1.59691e+08	9.1487e+07	1.94911e+08	1.60815e+08	170286580	1.44201e+08	139584992	1.74126e+08
P07306	ASGR1	Asialoglycoprotein receptor 1 OS=Homo sapiens GN=ASGR1 PE=1 SV=2	69.4158	33.2	2.1561e+09	2189546005	2.59487e+09	2.27243e+09	2.38512e+09	2.18375e+09	1.89692e+09	1.18525e+09	2.13663e+09
P07307	ASGR2	Asialoglycoprotein receptor 2 OS=Homo sapiens GN=ASGR2 PE=1 SV=2	55.9486	35.1	6.32642e+08	6.27973e+08	7.07654e+08	780088727	7.32144e+08	9.85804e+08	6.1764e+08	498508231	7.31469e+08
Q9UBL3	ASH2L	Set1/Ash2 histone methyltransferase complex subunit ASH2 OS=Homo sapiens GN=ASH2L PE=1 SV=1	33.9172	68.7	203610118	1.79981e+08	2.23261e+08	2.06159e+08	1.76221e+08	2.02722e+08	192345941	1.22763e+08	1.89384e+08
P04424	ASL	Argininosuccinate lyase OS=Homo sapiens GN=ASL PE=1 SV=4	19.6121	51.6	7.8111e+07	9.48806e+07	9.67659e+07	8.94164e+07	5.04191e+07	5.38575e+06	32447079	3.67966e+07	93290207
O95671	ASMTL	N-acetylserotonin O-methyltransferase-like protein OS=Homo sapiens GN=ASMTL PE=1 SV=3	20.934	68.8	3.93516e+07	3.76277e+07	6.40519e+07	4.26081e+07	53954465	4.70362e+07	6.50577e+07	1.05025e+07	2.66098e+07
P08243	ASNS	Asparagine synthetase [glutamine-hydrolyzing] OS=Homo sapiens GN=ASNS PE=1 SV=4	55.2585	64.3	5.31825e+08	4.72599e+08	5.28248e+08	6.70189e+08	5.78216e+08	7.86243e+08	7.00636e+08	3.928e+08	6.65005e+08
Q9NWL6	ASNSD1	Asparagine synthetase domain-containing protein 1 OS=Homo sapiens GN=ASNSD1 PE=2 SV=1	4.66563	72.1		4.86865e+06
Q12797	ASPH	Aspartyl/asparaginyl beta-hydroxylase OS=Homo sapiens GN=ASPH PE=1 SV=3	46.0422	85.8	1.60159e+09	1.58442e+09	1.71777e+09	1.54801e+09	1.70853e+09	1.76046e+09	1425300670	9.85629e+08	1.49081e+09
Q8IZT6	ASPM	Abnormal spindle-like microcephaly-associated protein OS=Homo sapiens GN=ASPM PE=1 SV=2	0.373886	409.5
Q9BXN1	ASPN	Asporin OS=Homo sapiens GN=ASPN PE=1 SV=2	2.10526	43.4
Q9BZE9	ASPSCR1	Tether containing UBX domain for GLUT4 OS=Homo sapiens GN=ASPSCR1 PE=1 SV=1	30.5606	60.1	1.10418e+08	1.14211e+08	1.24014e+08	3.6406e+08	5.13391e+07	6.32623e+07	112107003	2.38215e+07	1.14939e+08
Q7L266	ASRGL1	L-asparaginase OS=Homo sapiens GN=ASRGL1 PE=1 SV=2	15.9091	32		15090593
P00966	ASS1	Argininosuccinate synthase OS=Homo sapiens GN=ASS1 PE=1 SV=2	62.3786	46.5	7.58563e+08	696440650	7.83325e+08	8.31001e+08	7.59185e+08	8.30863e+08	7.34508e+08	4.07274e+08	8.61837e+08
Q76L83	ASXL2	Putative Polycomb group protein ASXL2 OS=Homo sapiens GN=ASXL2 PE=1 SV=1	1.25436	153.7		126560173		11736991
Q8NBU5	ATAD1	ATPase family AAA domain-containing protein 1 OS=Homo sapiens GN=ATAD1 PE=1 SV=1	62.3269	40.7	3.90156e+08	5.21748e+08	5.6781e+08	3.42138e+08	4.64781e+08	3.74715e+08	4.79111e+08	2.94757e+08	5.10544e+08
Q6PL18	ATAD2	ATPase family AAA domain-containing protein 2 OS=Homo sapiens GN=ATAD2 PE=1 SV=1	27.9856	158.5	1.81505e+08	1.61682e+08	1.83349e+08	1.444e+08	1.65941e+08	1.80617e+08	1.68402e+08	1.06318e+08	1.69214e+08
Q9ULI0	ATAD2B	ATPase family AAA domain-containing protein 2B OS=Homo sapiens GN=ATAD2B PE=1 SV=2	3.29218	164.8	6.7136e+06	8833451	1.01639e+07		1.41355e+06	1.19424e+07	4.14948e+06	1.94003e+06
Q9NVI7	ATAD3A	ATPase family AAA domain-containing protein 3A OS=Homo sapiens GN=ATAD3A PE=1 SV=2	57.4132	71.3	1688458086	1.60558e+09	1799130460	1.84917e+09	1.75824e+09	1.84551e+09	1.25098e+09	1.01741e+09	1.73171e+09
Q5T9A4	ATAD3B	ATPase family AAA domain-containing protein 3B OS=Homo sapiens GN=ATAD3B PE=1 SV=1	62.8086	72.5	1.5812e+09	7.11617e+08	8.68568e+08	7.14254e+08	6.70393e+08	6.94731e+08	4.85165e+08	1.1494e+09	6.10986e+08
Q5T2N8	ATAD3C	ATPase family AAA domain-containing protein 3C OS=Homo sapiens GN=ATAD3C PE=1 SV=2	34.0633	46.4				2.30673e+08
Q96QE3	ATAD5	ATPase family AAA domain-containing protein 5 OS=Homo sapiens GN=ATAD5 PE=1 SV=3	0.759219	207.4
Q5SQI0	ATAT1	UPF0635 protein C6orf134 OS=Homo sapiens GN=C6orf134 PE=1 SV=1	3.80048	46.8
O95260	ATE1	Arginyl-tRNA--protein transferase 1 OS=Homo sapiens GN=ATE1 PE=1 SV=2	21.4286	59.1	2.41838e+07	7.82508e+07	13577493	9.25119e+07	23538106	67889113	2.68594e+07	1.53899e+07	6.55556e+07
P18846	ATF1	Cyclic AMP-dependent transcription factor ATF-1 OS=Homo sapiens GN=ATF1 PE=1 SV=2	12.1771	29.2	86772282	3.3882e+07	8.84301e+07				49609511
P15336	ATF2	Cyclic AMP-dependent transcription factor ATF-2 OS=Homo sapiens GN=ATF2 PE=1 SV=4	14.2574	54.5	2.75396e+07	17712815			7.01697e+06
P17544	ATF7	Cyclic AMP-dependent transcription factor ATF-7 OS=Homo sapiens GN=ATF7 PE=1 SV=2	7.48988	52.9		23207457				1.34323e+07
O94817	ATG12	Autophagy-related protein 12 OS=Homo sapiens GN=ATG12 PE=1 SV=1	7.14286	15.1								4.11302e+06
O75143	ATG13	Autophagy-related protein 13 OS=Homo sapiens GN=KIAA0652 PE=1 SV=1	10.6383	56.5		1.02013e+07					9.29664e+06
Q6ZNE5	ATG14	Uncharacterized protein KIAA0831 OS=Homo sapiens GN=KIAA0831 PE=1 SV=1	3.65854	55.3
Q676U5	ATG16L1	Autophagy-related protein 16-1 OS=Homo sapiens GN=ATG16L1 PE=1 SV=2	10.0494	68.2			6.36102e+07
Q9NT62	ATG3	Autophagy-related protein 3 OS=Homo sapiens GN=ATG3 PE=1 SV=1	12.1019	35.8	1.86984e+07	4.51938e+07	4.46304e+07	2.18426e+06	2.84773e+07		4.47837e+07	2.57e+07
Q9Y4P1	ATG4B	Cysteine protease ATG4B OS=Homo sapiens GN=ATG4B PE=1 SV=1	29.2621	44.3	1.23908e+08	1.1891e+08	1.15826e+08	1.5315e+08	1.3663e+08	1.44875e+08	1.09301e+08	7.30554e+07	1.11889e+08
Q9H1Y0	ATG5	Autophagy protein 5 OS=Homo sapiens GN=ATG5 PE=1 SV=2	22.5455	32.4	3.04378e+07	2.80961e+07	4.00033e+07	26072245	2.62469e+07		4.54545e+07		3.1314e+07
O95352	ATG7	Autophagy-related protein 7 OS=Homo sapiens GN=ATG7 PE=1 SV=1	7.39687	77.9			71061682				2.01661e+07
Q7Z3C6	ATG9A	Autophagy-related protein 9A OS=Homo sapiens GN=ATG9A PE=1 SV=2	20.143	94.4	4.83902e+07	7.89304e+07	7.8232e+07	1.04781e+08	8.83994e+07	9.30751e+07	78079466	5.25569e+07	8.28414e+07
P31939	ATIC	Bifunctional purine biosynthesis protein PURH OS=Homo sapiens GN=ATIC PE=1 SV=3	79.223	64.6	1.52864e+09	1.51348e+09	1.77213e+09	1.71848e+09	1.65507e+09	1.80563e+09	1.64091e+09	1.13773e+09	1.77003e+09
Q8NHH9	ATL2	Atlastin-2 OS=Homo sapiens GN=ATL2 PE=1 SV=2	41.8525	66.2	3.39644e+08	3.38778e+08	3.84127e+08	3.27341e+08	3.16654e+08	3.33288e+08	3.01181e+08	1.86312e+08	3.24318e+08
Q13315	ATM	Serine-protein kinase ATM OS=Homo sapiens GN=ATM PE=1 SV=2	16.8848	350.5	3.67497e+07	4.04574e+07	3.76395e+07	2.77531e+07	3.42575e+07	3.06863e+07	4.46424e+07	2.29047e+07	3.96763e+07
O00244	ATOX1	Copper transport protein ATOX1 OS=Homo sapiens GN=ATOX1 PE=1 SV=1	54.4118	7.4	1.65279e+08	1.65404e+08	248882040	1.88751e+08	204865985	154058226	1.66283e+08	2.41868e+08	1.65769e+08
O60312	ATP10A	Probable phospholipid-transporting ATPase VA OS=Homo sapiens GN=ATP10A PE=2 SV=2	2.86858	167.6
P98196	ATP11A	Probable phospholipid-transporting ATPase IH OS=Homo sapiens GN=ATP11A PE=2 SV=3	16.0494	129.7	46714331	3.77356e+07	4.51619e+07	6.69756e+08	8.17584e+08			3.24532e+07
Q9Y2G3	ATP11B	Probable phospholipid-transporting ATPase IF OS=Homo sapiens GN=ATP11B PE=1 SV=2	2.54885	134.1
Q8NB49	ATP11C	Probable phospholipid-transporting ATPase IG OS=Homo sapiens GN=ATP11C PE=1 SV=3	4.24028	129.4	2.38749e+07		22860946	2.51407e+07		27867348
Q9HD20	ATP13A1	Probable cation-transporting ATPase 13A1 OS=Homo sapiens GN=ATP13A1 PE=1 SV=2	33.887	132.9	3.18579e+08	2.81664e+08	3.16628e+08	2.93492e+08	2.76774e+08	3.13901e+08	2.94951e+08	1.89568e+08	2.96204e+08
Q9NQ11	ATP13A2	Probable cation-transporting ATPase 13A2 OS=Homo sapiens GN=ATP13A2 PE=2 SV=2	1.35593	128.7	4.02331e+06	1.13371e+06
Q9H7F0	ATP13A3	Probable cation-transporting ATPase 13A3 OS=Homo sapiens GN=ATP13A3 PE=1 SV=4	3.99674	138	1.15781e+07	2.90337e+07	2.3306e+07	3.25231e+07	1.31861e+07		20720287	8.33856e+06	2.35186e+07
P05023	ATP1A1	Sodium/potassium-transporting ATPase subunit alpha-1 OS=Homo sapiens GN=ATP1A1 PE=1 SV=1	49.4624	112.8	5.33805e+09	5.16329e+09	5.71871e+09	4.58183e+09	4.5156e+09	4.59259e+09	4366118246	2.92788e+09	4.97427e+09
P50993	ATP1A2	Sodium/potassium-transporting ATPase subunit alpha-2 OS=Homo sapiens GN=ATP1A2 PE=1 SV=1	19.1176	112.2
P05026	ATP1B1	Sodium/potassium-transporting ATPase subunit beta-1 OS=Homo sapiens GN=ATP1B1 PE=1 SV=1	47.5248	35	3.01126e+09	3.06533e+09	3.18879e+09	2.60752e+09	2.58436e+09	2.60726e+09	2.81973e+09	2.00022e+09	2793535622
P54709	ATP1B3	Sodium/potassium-transporting ATPase subunit beta-3 OS=Homo sapiens GN=ATP1B3 PE=1 SV=1	30.1075	31.5	1.84327e+09	1.75104e+09	2.11321e+09	1.6842e+09	1.53075e+09	1.58432e+09	1578211944	1.04247e+09	1.62628e+09
P16615	ATP2A2	Sarcoplasmic/endoplasmic reticulum calcium ATPase 2 OS=Homo sapiens GN=ATP2A2 PE=1 SV=1	48.9443	114.7	2.0305e+09	1.94928e+09	2.20579e+09	2.36285e+09	2.11951e+09	2290948412	1.79749e+09	1.09224e+09	1.99757e+09
Q93084	ATP2A3	Sarcoplasmic/endoplasmic reticulum calcium ATPase 3 OS=Homo sapiens GN=ATP2A3 PE=1 SV=2	9.3001	113.9
P20020	ATP2B1	Plasma membrane calcium-transporting ATPase 1 OS=Homo sapiens GN=ATP2B1 PE=1 SV=3	29.4118	138.7	2.22493e+08	4.49455e+08	2.48801e+08	3.58977e+08	3.44675e+08	1.80333e+08	1.86992e+08	1.16113e+08	5.02681e+08
P23634	ATP2B4	Plasma membrane calcium-transporting ATPase 4 OS=Homo sapiens GN=ATP2B4 PE=1 SV=2	14.7462	137.8	2.8631e+07				28659133
P98194	ATP2C1	Calcium-transporting ATPase type 2C member 1 OS=Homo sapiens GN=ATP2C1 PE=1 SV=3	20.7835	100.5	5.10767e+07	6.02337e+07	3.34877e+07	6.32557e+07	6.06592e+07	6.11524e+07	7.01389e+07	2.36451e+07	5.8912e+07
P25705	ATP5F1A	ATP synthase subunit alpha, mitochondrial OS=Homo sapiens GN=ATP5A1 PE=1 SV=1	70.1627	59.7	1.81757e+10	1.83021e+10	1.92472e+10	1.87985e+10	16845816585	1.82715e+10	1.74754e+10	1.10668e+10	1.79091e+10
P06576	ATP5F1B	ATP synthase subunit beta, mitochondrial OS=Homo sapiens GN=ATP5B PE=1 SV=3	76.5595	56.5	21810604642	2.04851e+10	2.4456e+10	2.19809e+10	2.10868e+10	2.18129e+10	2.01816e+10	1.19344e+10	2.22716e+10
P36542	ATP5F1C	ATP synthase subunit gamma, mitochondrial OS=Homo sapiens GN=ATP5C1 PE=1 SV=1	51.3423	33	3.90193e+09	3.36792e+09	3.90762e+09	3.69372e+09	3.43468e+09	3.86407e+09	3.79023e+09	2294135330	3.50657e+09
P30049	ATP5F1D	ATP synthase subunit delta, mitochondrial OS=Homo sapiens GN=ATP5D PE=1 SV=2	58.3333	17.5	3.06362e+09	3.20994e+09	3.80364e+09	2.50194e+09	2.38194e+09	2631738213	1.64356e+09	1.46317e+08	2.61965e+09
P56381	ATP5F1E	ATP synthase subunit epsilon, mitochondrial OS=Homo sapiens GN=ATP5E PE=1 SV=2	15.6863	5.8				1.24725e+09	1.30356e+09	1218496748	911449024	929647280	1106378360
Q9UII2	ATP5IF1	ATPase inhibitor, mitochondrial OS=Homo sapiens GN=ATPIF1 PE=1 SV=1	23.5849	12.2		4.04818e+06	4.66483e+06	8.07334e+07	9.21483e+07	9.01994e+07	8.67057e+07	6.21638e+07	6.48451e+07
P48201	ATP5MC3	ATP synthase lipid-binding protein, mitochondrial OS=Homo sapiens GN=ATP5G3 PE=1 SV=1	26.7606	14.7	979471		1.45253e+06		3.67878e+08	3.53588e+08	346274342	2.40024e+08	2.82747e+08
P56385	ATP5ME	ATP synthase subunit e, mitochondrial OS=Homo sapiens GN=ATP5I PE=1 SV=2	62.3188	7.9	2.72773e+09	2.5349e+09	2.67815e+09	2.34851e+09	2.42013e+09	2.71522e+09	2.07765e+09	1.08719e+09	2.43283e+09
P56134	ATP5MF	ATP synthase subunit f, mitochondrial OS=Homo sapiens GN=ATP5J2 PE=1 SV=3	39.3617	10.9	3.01852e+09	2.83323e+09	4.7589e+09	3.28929e+09	2.8097e+09	3.31459e+09	2.85934e+09	1.74737e+09	3.18697e+09
O75964	ATP5MG	ATP synthase subunit g, mitochondrial OS=Homo sapiens GN=ATP5L PE=1 SV=3	47.5728	11.4	2.78526e+09	3.17674e+09	2.52021e+09	2.30753e+09	2.14672e+09	2.16493e+09	2392370809	1.7979e+09	2.36748e+09
P56378	ATP5MJ	6.8 kDa mitochondrial proteolipid OS=Homo sapiens GN=MP68 PE=1 SV=1	32.7586	6.7	1.27365e+09	1.21254e+09	8.41711e+08	507511164	1.27015e+09	1442357634	1.21498e+09	7.75365e+08	1.4095e+09
Q96IX5	ATP5MK	Up-regulated during skeletal muscle growth protein 5 OS=Homo sapiens GN=USMG5 PE=1 SV=1	46.5517	6.5	2.62128e+09	2.74992e+09	3.17772e+09	3.28397e+09	3.20127e+09	3114867358	1.9646e+09	1.37503e+09	1.82614e+09
P24539	ATP5PB	ATP synthase subunit b, mitochondrial OS=Homo sapiens GN=ATP5F1 PE=1 SV=2	57.4219	28.9	3.62982e+09	3.75536e+09	4.1669e+09	3.95711e+09	3.44502e+09	3.83978e+09	3.59091e+09	1.8221e+09	3.35108e+09
O75947	ATP5PD	ATP synthase subunit d, mitochondrial OS=Homo sapiens GN=ATP5H PE=1 SV=3	83.2298	18.5	5.74712e+09	5.58919e+09	6.49623e+09	4.75379e+09	4.10605e+09	4.67371e+09	5.47906e+09	3.74765e+09	3.73307e+09
P18859	ATP5PF	ATP synthase-coupling factor 6, mitochondrial OS=Homo sapiens GN=ATP5J PE=1 SV=1	45.3704	12.6	2.82654e+09	2.65356e+09	2.93519e+09	2.31086e+09	2.47515e+09	2.50334e+09	2.57139e+09	1.6116e+09	2.42253e+09
P48047	ATP5PO	ATP synthase subunit O, mitochondrial OS=Homo sapiens GN=ATP5O PE=1 SV=1	61.5023	23.3	4386058619	4.19748e+09	4.63257e+09	4.61081e+09	4.48258e+09	4.53247e+09	4.00315e+09	2.52347e+09	4730506523
Q15904	ATP6AP1	V-type proton ATPase subunit S1 OS=Homo sapiens GN=ATP6AP1 PE=1 SV=2	30.8511	52	2.15378e+08	2.29277e+08	2.65867e+08	2.14233e+08	1.78697e+08	2.0168e+08	2.31246e+08	1.5231e+08	2.3788e+08
O75787	ATP6AP2	Renin receptor OS=Homo sapiens GN=ATP6AP2 PE=1 SV=2	32.5714	39	2.44911e+08	242993594	2.10369e+08	2.48374e+08	2.04876e+08	2.47884e+08	2.10698e+08	1.51446e+08	263422597
Q93050	ATP6V0A1	V-type proton ATPase 116 kDa subunit a isoform 1 OS=Homo sapiens GN=ATP6V0A1 PE=1 SV=3	32.736	96.4	2.42453e+08	2.30843e+08	2.80825e+08	3.22596e+08	2.88076e+08	3.15647e+08	2.53459e+08	1.61224e+08	2.69644e+08
Q9Y487	ATP6V0A2	V-type proton ATPase 116 kDa subunit a isoform 2 OS=Homo sapiens GN=ATP6V0A2 PE=1 SV=2	12.9673	98	2.97959e+07	2.62486e+07	4.46689e+07	2.82314e+07	1.99753e+07	3.47367e+07	3.16016e+07	15327025	2.69609e+07
P27449	ATP6V0C	V-type proton ATPase 16 kDa proteolipid subunit OS=Homo sapiens GN=ATP6V0C PE=1 SV=1	11.6129	15.7	1.07247e+09	9.79772e+08	1.02764e+09	594979064	1.17323e+09	1.22564e+09	746244948	4.83652e+08	1.14005e+09
P61421	ATP6V0D1	V-type proton ATPase subunit d 1 OS=Homo sapiens GN=ATP6V0D1 PE=1 SV=1	35.8974	40.3	4.12941e+08	4.85266e+08	5.34916e+08	5.98158e+08	5.27751e+08	5.21442e+08	522649307	3.26534e+08	533500686
P38606	ATP6V1A	V-type proton ATPase catalytic subunit A OS=Homo sapiens GN=ATP6V1A PE=1 SV=2	65.9643	68.3	8.20761e+08	8.03141e+08	6.78409e+08	8.14142e+08	8.178e+08	9.02219e+08	9.1536e+08	6.14535e+08	915908189
P21281	ATP6V1B2	V-type proton ATPase subunit B, brain isoform OS=Homo sapiens GN=ATP6V1B2 PE=1 SV=3	65.1663	56.5	4.22686e+08	4.59479e+08	542163259	5.30664e+08	4.77915e+08	5.26308e+08	4.57053e+08	2.88726e+08	5.35271e+08
P21283	ATP6V1C1	V-type proton ATPase subunit C 1 OS=Homo sapiens GN=ATP6V1C1 PE=1 SV=4	64.1361	43.9	2.4339e+08	2.56657e+08	1.57441e+08	283678935	2.48009e+08	2.64484e+08	1.75356e+08	1.47576e+08	2.2064e+08
Q9Y5K8	ATP6V1D	V-type proton ATPase subunit D OS=Homo sapiens GN=ATP6V1D PE=1 SV=1	34.0081	28.2	1.0239e+08	3.89364e+07	66516658	1.1647e+08	1.04948e+08	9.87986e+07	78538328	4.8356e+07	1.00756e+08
P36543	ATP6V1E1	V-type proton ATPase subunit E 1 OS=Homo sapiens GN=ATP6V1E1 PE=1 SV=1	50	26.1	3.87893e+08	3.58527e+08	4.47351e+08	274789946	2.85564e+08	2.96288e+08	3.88675e+08	2.81958e+08	3.3627e+08
Q16864	ATP6V1F	V-type proton ATPase subunit F OS=Homo sapiens GN=ATP6V1F PE=1 SV=2	75.6303	13.4	1.42264e+08	1.4727e+08	1.45018e+08	2.18486e+08	1.66549e+08	1.81883e+08	1.46291e+08	4.81904e+07	1.69962e+08
O75348	ATP6V1G1	V-type proton ATPase subunit G 1 OS=Homo sapiens GN=ATP6V1G1 PE=1 SV=3	61.0169	13.7	469486423	4.42552e+08	5.15363e+08	3.91367e+08	4.07263e+08	3.68671e+08	4.39405e+08	3.23757e+08	4.02574e+08
Q9UI12	ATP6V1H	V-type proton ATPase subunit H OS=Homo sapiens GN=ATP6V1H PE=1 SV=1	45.9627	55.8	1.09754e+08	1.40258e+08	1.33192e+08	1.18168e+08	1.06181e+08	121688367	1.22242e+08	6.87483e+07	1.5572e+08
Q04656	ATP7A	Copper-transporting ATPase 1 OS=Homo sapiens GN=ATP7A PE=1 SV=3	2.8	163.3	9.88657e+06	8776194	1.20532e+07	7.72e+06	8482223	8.62192e+06			3.77348e+06
P35670	ATP7B	Copper-transporting ATPase 2 OS=Homo sapiens GN=ATP7B PE=1 SV=4	8.3959	157.2	1.48982e+07	4.12155e+07	4.74152e+07	4.54681e+07	2.18819e+07	2.42189e+07	3.24859e+07	2.49475e+07	3.40131e+07
O75110	ATP9A	Probable phospholipid-transporting ATPase IIA OS=Homo sapiens GN=ATP9A PE=1 SV=3	4.96657	118.5			1.81603e+07			7.24413e+06		1.17442e+07
O43861	ATP9B	Probable phospholipid-transporting ATPase IIB OS=Homo sapiens GN=ATP9B PE=2 SV=4	3.22581	129.2
Q5TC12	ATPAF1	ATP synthase mitochondrial F1 complex assembly factor 1 OS=Homo sapiens GN=ATPAF1 PE=1 SV=1	28.0488	36.4	1.16129e+08	1.50195e+08	1.54901e+08	63946686	9.8211e+07	97283280	1.15555e+08	7.03803e+07	1.37305e+08
Q8N5M1	ATPAF2	ATP synthase mitochondrial F1 complex assembly factor 2 OS=Homo sapiens GN=ATPAF2 PE=1 SV=1	59.8616	32.8	1.07993e+08	9.11154e+07	1.3431e+08	1.0993e+08	9.08054e+07	1.00867e+08	1.07966e+08	4.5564e+07	8.84972e+07
Q13535	ATR	Serine/threonine-protein kinase ATR OS=Homo sapiens GN=ATR PE=1 SV=3	6.27837	301.2	2.08612e+07	2.71706e+07	3.2457e+07	19360058	1.24602e+07	5.704e+07	3.21674e+07	1.79908e+07	3.02797e+07
Q8WXE1	ATRIP	ATR-interacting protein OS=Homo sapiens GN=ATRIP PE=1 SV=1	3.66625	85.8		13815539	7365727
O75882	ATRN	Attractin OS=Homo sapiens GN=ATRN PE=1 SV=2	12.7362	158.4	1.3621e+08	1.38548e+08	1.19473e+08	1.10157e+08	1.20194e+08	1.35607e+08	1.11241e+08	8.26166e+07	7.03144e+07
P46100	ATRX	Transcriptional regulator ATRX OS=Homo sapiens GN=ATRX PE=1 SV=4	8.06581	282.3	5.23585e+07	6.96767e+07	4.73656e+07	7609680	6029510	26458221	1.49248e+07	4.94684e+06	34390760
Q9UBB4	ATXN10	Ataxin-10 OS=Homo sapiens GN=ATXN10 PE=1 SV=1	34.9474	53.5	1.4969e+08	1.50036e+08	1.7446e+08	1.25645e+08	1.06437e+08	1.14728e+08	1.42331e+08	1.18082e+08	1.84707e+08
Q99700	ATXN2	Ataxin-2 OS=Homo sapiens GN=ATXN2 PE=1 SV=2	10.2818	140.2	5.16713e+07	3.48495e+07	2.87818e+07	2.666e+07	1.46881e+07	1.82657e+07	4.0957e+07	1.257e+07	2.62285e+07
Q8WWM7	ATXN2L	Ataxin-2-like protein OS=Homo sapiens GN=ATXN2L PE=1 SV=2	29.0233	113.3	2.7389e+08	280841767	2.93857e+08	2.54981e+08	2.24545e+08	2.72238e+08	3.04456e+08	1.73443e+08	3.14923e+08
Q13825	AUH	Methylglutaconyl-CoA hydratase, mitochondrial OS=Homo sapiens GN=AUH PE=1 SV=1	34.5133	35.6	2.72877e+08	2.84189e+08	1.96997e+08	2.93197e+08	2.47194e+08	2.37572e+08	2.72756e+08	1.94242e+08	2.47536e+08
Q9Y679	AUP1	Ancient ubiquitous protein 1 OS=Homo sapiens GN=AUP1 PE=1 SV=1	30.4622	53	3.8574e+08	3.76398e+08	4.23454e+08	419435300	3.99443e+08	3.91984e+08	3.15712e+08	2.26234e+08	377873426
O14965	AURKA	Serine/threonine-protein kinase 6 OS=Homo sapiens GN=AURKA PE=1 SV=2	37.7171	45.8	5.67906e+08	171695118	1.77211e+08	6.41113e+07	1.11217e+08	8.29858e+07	1.46197e+08	1.08607e+08	161972510
Q9NWT8	AURKAIP1	Aurora kinase A-interacting protein OS=Homo sapiens GN=AURKAIP1 PE=1 SV=1	5.02513	22.3					2.86914e+08	2.1597e+08	215856069	1.57831e+08	2.64333e+08
Q96GD4	AURKB	Serine/threonine-protein kinase 12 OS=Homo sapiens GN=AURKB PE=1 SV=2	34.0116	39.3	7.29149e+07	5.76046e+07	7.41569e+07		3.40237e+07	1.21408e+07	5.99397e+07	3.87172e+07
Q9NQS1	AVEN	Cell death regulator Aven OS=Homo sapiens GN=AVEN PE=1 SV=1	5.24862	38.5				1.6121e+07		17040537
Q8NBF6	AVL9	Late secretory pathway protein AVL9 homolog OS=Homo sapiens GN=AVL9 PE=1 SV=1	6.01852	71.9			32095534
O15169	AXIN1	Axin-1 OS=Homo sapiens GN=AXIN1 PE=1 SV=2	2.32019	95.6	3.87147e+06
Q9Y2T1	AXIN2	Axin-2 OS=Homo sapiens GN=AXIN2 PE=1 SV=1	2.01661	93.5
P25311	AZGP1	Zinc-alpha-2-glycoprotein OS=Homo sapiens GN=AZGP1 PE=1 SV=1	22.3729	33.9	5.91972e+07	5.99553e+07	5.79432e+07	5.42612e+07	8.9518e+07	1.01302e+08	5.59574e+07	3.32734e+07	4.44761e+07
Q9H6S1	AZI2	5-azacytidine-induced protein 2 OS=Homo sapiens GN=AZI2 PE=1 SV=1	4.08163	44.9			6.08467e+06
P61769	B2M	Beta-2-microglobulin OS=Homo sapiens GN=B2M PE=1 SV=1	35.2941	13.7	1.35687e+09	1.33901e+09	7.94358e+08	7.17507e+08	2.49868e+08	8.15498e+08	7.30907e+08	3.89595e+08	5.4383e+08
Q8NCR0	B3GALNT2	UDP-GalNAc:beta-1,3-N-acetylgalactosaminyltransferase 2 OS=Homo sapiens GN=B3GALNT2 PE=1 SV=1	2.6	56.7
Q96L58	B3GALT6	Beta-1,3-galactosyltransferase 6 OS=Homo sapiens GN=B3GALT6 PE=2 SV=2	17.3252	37.1	274107670	5.53248e+08	3.58928e+08		494375146		509325371	1.19803e+08	499146380
O94766	B3GAT3	Galactosylgalactosylxylosylprotein 3-beta-glucuronosyltransferase 3 OS=Homo sapiens GN=B3GAT3 PE=1 SV=2	41.4925	37.1	2.113e+08	1.42414e+08	1.91157e+08	1.64894e+08	2.06745e+08	197686064	2.1428e+08	1.21005e+08	2.24413e+08
Q6Y288	B3GLCT	Beta-1,3-glucosyltransferase OS=Homo sapiens GN=B3GALTL PE=1 SV=2	4.01606	56.5							2.80571e+07
Q9NY97	B3GNT2	UDP-GlcNAc:betaGal beta-1,3-N-acetylglucosaminyltransferase 2 OS=Homo sapiens GN=B3GNT2 PE=1 SV=2	16.1209	46
Q9Y2A9	B3GNT3	UDP-GlcNAc:betaGal beta-1,3-N-acetylglucosaminyltransferase 3 OS=Homo sapiens GN=B3GNT3 PE=1 SV=1	10.2151	42.5		6.70595e+07		8.28981e+07	7.64286e+07				6.56322e+07
P15291	B4GALT1	Beta-1,4-galactosyltransferase 1 OS=Homo sapiens GN=B4GALT1 PE=1 SV=5	29.8995	43.9	1.52036e+08	1.41975e+08	2.75247e+08	2.12448e+08	174787573	156048400	1.98571e+08	1.21639e+08	2.15177e+08
O60909	B4GALT2	Beta-1,4-galactosyltransferase 2 OS=Homo sapiens GN=B4GALT2 PE=1 SV=1	16.9355	41.9	2.71819e+07	3.56042e+07	3.70864e+07				1.22761e+07	1.48524e+07
O60512	B4GALT3	Beta-1,4-galactosyltransferase 3 OS=Homo sapiens GN=B4GALT3 PE=1 SV=2	9.16031	43.9	2.88782e+07	3.62666e+07					51268411	6544675
O60513	B4GALT4	Beta-1,4-galactosyltransferase 4 OS=Homo sapiens GN=B4GALT4 PE=1 SV=1	5.23256	40			9.24058e+06				6.01668e+07
O43286	B4GALT5	Beta-1,4-galactosyltransferase 5 OS=Homo sapiens GN=B4GALT5 PE=2 SV=1	9.79381	45.1	175603189	170404677	2.26342e+08	165600040	8.28942e+07	221192082	179487965	1.08392e+08	218033284
Q9UBV7	B4GALT7	Beta-1,4-galactosyltransferase 7 OS=Homo sapiens GN=B4GALT7 PE=1 SV=1	5.8104	37.4	2.29161e+07	19306618	1.66192e+07	18782637	1.90761e+07	26268188	2.5079e+07	13411597	2.29389e+07
O43505	B4GAT1	N-acetyllactosaminide beta-1,3-N-acetylglucosaminyltransferase OS=Homo sapiens GN=B3GNT1 PE=1 SV=1	51.3253	47.1	3.691e+08	3.31052e+08	3.34382e+08	2.33794e+08	2.02119e+08	2.23992e+08	2.78614e+08	2.0735e+08	3.66775e+08
Q9NWV8	BABAM1	BRCA1-A complex subunit MERIT40 OS=Homo sapiens GN=MERIT40 PE=1 SV=1	22.1884	36.5	4.10247e+07	3.80698e+07	4.00754e+07	1.50557e+07	40161265		2.15084e+07	4.97076e+07	19587527
Q9NXR7	BABAM2	BRCA1-A complex subunit BRE OS=Homo sapiens GN=BRE PE=1 SV=2	16.4491	43.5	4.88681e+07	8.97116e+07	19986765	143711264	75616915	1.02799e+08	1.08275e+08	9.94659e+07	3.87267e+07
O14867	BACH1	Transcription regulator protein BACH1 OS=Homo sapiens GN=BACH1 PE=1 SV=2	4.8913	81.9
Q99933	BAG1	BAG family molecular chaperone regulator 1 OS=Homo sapiens GN=BAG1 PE=1 SV=3	14.4928	38.9									17348034
O95816	BAG2	BAG family molecular chaperone regulator 2 OS=Homo sapiens GN=BAG2 PE=1 SV=1	65.4028	23.8	8.09413e+08	7.72772e+08	8.84e+08	8.21817e+08	7.18026e+08	8.23939e+08	6.14747e+08	6.47964e+08	8.3858e+08
O95817	BAG3	BAG family molecular chaperone regulator 3 OS=Homo sapiens GN=BAG3 PE=1 SV=3	36.5217	61.6	1.08842e+08	8.258e+07	1.25579e+08	7.0568e+07	9.63679e+07	9.38466e+07	65329512	5.03417e+07	1.16839e+08
O95429	BAG4	BAG family molecular chaperone regulator 4 OS=Homo sapiens GN=BAG4 PE=1 SV=1	9.40919	49.6	1.38918e+07	10745593				24488738
Q9UL15	BAG5	BAG family molecular chaperone regulator 5 OS=Homo sapiens GN=BAG5 PE=1 SV=1	21.2528	51.2	3.72618e+07	1.67241e+07	4.18737e+07	4.36239e+07	5.13875e+07	3.922e+07	5.12201e+07	1.46915e+07	1.73608e+07
P46379	BAG6	Large proline-rich protein BAT3 OS=Homo sapiens GN=BAT3 PE=1 SV=2	41.7845	119.3	3.64551e+08	3.41854e+08	4.38786e+08	3.25791e+08	2.85889e+08	327650721	3.86129e+08	2.3406e+08	4.0908e+08
Q9UQB8	BAIAP2	Brain-specific angiogenesis inhibitor 1-associated protein 2 OS=Homo sapiens GN=BAIAP2 PE=1 SV=1	32.0652	60.8	1.19317e+08	1.23228e+08	1.09918e+08	1.07565e+08	159693613	1.2841e+08	1.2224e+08	3.37477e+08	1.49828e+08
Q9UHR4	BAIAP2L1	Brain-specific angiogenesis inhibitor 1-associated protein 2-like protein 1 OS=Homo sapiens GN=BAIAP2L1 PE=1 SV=2	33.4638	56.8	1.29705e+08	1.32375e+08	1.54632e+08	1.41376e+08	1.39703e+08	1.4961e+08	1.15977e+08	4.57992e+07	1.26035e+08
Q6UXY1	BAIAP2L2	Brain-specific angiogenesis inhibitor 1-associated protein 2-like protein 2 OS=Homo sapiens GN=BAIAP2L2 PE=2 SV=1	8.31758	59			1.59613e+07
Q16611	BAK1	Bcl-2 homologous antagonist/killer OS=Homo sapiens GN=BAK1 PE=1 SV=1	45.0237	23.4	1.7765e+08	1.97252e+08	1.89511e+08	2.15712e+08	1.9774e+08	2.25439e+08	1.48209e+08	1.27133e+08	1.82388e+08
O75531	BANF1	Barrier-to-autointegration factor OS=Homo sapiens GN=BANF1 PE=1 SV=1	50.5618	10.1	3310842507	3.44553e+09	3.58527e+09	3.67843e+09	3.80127e+09	3838463515	3.35052e+09	2.31588e+09	3.4795e+09
Q8N9N5	BANP	Protein BANP OS=Homo sapiens GN=BANP PE=1 SV=2	4.81696	56.4
Q92560	BAP1	Ubiquitin carboxyl-terminal hydrolase BAP1 OS=Homo sapiens GN=BAP1 PE=1 SV=2	11.6598	80.3					33312207			2.90066e+06
Q8IXM2	BAP18	MLL1/MLL complex subunit C17orf49 OS=Homo sapiens GN=C17orf49 PE=1 SV=1	41.8605	17.9	1.23024e+08	1.46789e+08	1.50782e+08	1.40318e+08	1.37548e+08	1.44908e+08	1.43853e+08	9.21804e+07	1.53852e+08
Q07812	BAX	Apoptosis regulator BAX OS=Homo sapiens GN=BAX PE=1 SV=1	59.8958	21.2	9.10535e+08	8.9407e+08	1.01087e+09	1.01233e+09	9.57884e+08	1.00843e+09	8.68608e+08	5.97306e+08	8.04369e+08
Q9NRL2	BAZ1A	Bromodomain adjacent to zinc finger domain protein 1A OS=Homo sapiens GN=BAZ1A PE=1 SV=2	16.4524	178.6	7.58263e+07	7.50097e+07	1.02525e+08	7.68618e+07	7.56464e+07	65897017	6.95713e+07	3.8521e+07	6.58148e+07
Q9UIG0	BAZ1B	Tyrosine-protein kinase BAZ1B OS=Homo sapiens GN=BAZ1B PE=1 SV=2	29.4673	170.8	2.48586e+08	2.56597e+08	2.87614e+08	3.75958e+08	3.42092e+08	3.86526e+08	2.74302e+08	2.55661e+08	2.88858e+08
Q9UIF9	BAZ2A	Bromodomain adjacent to zinc finger domain protein 2A OS=Homo sapiens GN=BAZ2A PE=1 SV=4	13.0709	211.1	5.70653e+07	68054660	7.67773e+07	4.75429e+07	4.5537e+07	4.74101e+07	5.97949e+07	2.84354e+07	4.70157e+07
Q9BXH1	BBC3	Bcl-2-binding component 3 OS=Homo sapiens GN=BBC3 PE=1 SV=1	26.943	20.5	52582976	4.88356e+07	6.41457e+07	2.83792e+07		2.12222e+07			26667169
Q8ND07	BBOF1	Uncharacterized protein C14orf45 OS=Homo sapiens GN=C14orf45 PE=1 SV=3	1.51229	61.9		27358211
Q8NFJ9	BBS1	Bardet-Biedl syndrome 1 protein OS=Homo sapiens GN=BBS1 PE=1 SV=1	4.89039	65						4.61328e+06			2.92584e+06
P50895	BCAM	Basal cell adhesion molecule OS=Homo sapiens GN=BCAM PE=1 SV=2	32.3248	67.4	142180915	1.15214e+08	1.56926e+08	1.66372e+08	1.41137e+08	1.59068e+08	2.02718e+08	1.10512e+08	1.79003e+08
Q9UHQ4	BCAP29	B-cell receptor-associated protein 29 OS=Homo sapiens GN=BCAP29 PE=1 SV=2	20.7469	28.3	35116539	9.26458e+07		3.49295e+07	1.35842e+07	2.5184e+07		1.00698e+07	2.51348e+07
P51572	BCAP31	B-cell receptor-associated protein 31 OS=Homo sapiens GN=BCAP31 PE=1 SV=3	48.374	28	1.86058e+09	2.02069e+09	2.02927e+09	2.19408e+09	2.10016e+09	2141292714	1665747324	1.59684e+09	1.71171e+09
P56945	BCAR1	Breast cancer anti-estrogen resistance protein 1 OS=Homo sapiens GN=BCAR1 PE=1 SV=2	3.90805	93.3		4.16309e+08						3.22266e+08
O75934	BCAS2	Pre-mRNA-splicing factor SPF27 OS=Homo sapiens GN=BCAS2 PE=1 SV=1	75.5556	26.1	8.30893e+08	8.3087e+08	8.51068e+08	8.9456e+08	7.76021e+08	7.72093e+08	7.75914e+08	4.20565e+08	6.97959e+08
Q9H6U6	BCAS3	Breast carcinoma-amplified sequence 3 OS=Homo sapiens GN=BCAS3 PE=1 SV=2	1.50862	101.1								1.19363e+07
Q9P287	BCCIP	BRCA2 and CDKN1A-interacting protein OS=Homo sapiens GN=BCCIP PE=1 SV=1	53.8217	36	895173002	8.58772e+08	9.83393e+08	8.60066e+08	7.87193e+08	8.89315e+08	8.8173e+08	5.97884e+08	9.77734e+08
P12694	BCKDHA	2-oxoisovalerate dehydrogenase subunit alpha, mitochondrial OS=Homo sapiens GN=BCKDHA PE=1 SV=2	43.8202	50.4	1.60931e+08	1.82586e+08	2.44375e+08	1.44514e+08	1.38491e+08	1.77085e+08	1.78729e+08	1.11345e+08	1.95602e+08
P21953	BCKDHB	2-oxoisovalerate dehydrogenase subunit beta, mitochondrial OS=Homo sapiens GN=BCKDHB PE=1 SV=2	17.8571	43.1	1.22441e+08	1.33894e+08	1.8099e+08	9.7555e+07	1.21456e+08	1.5352e+08	1.19064e+08	5.2666e+07	136749308
O14874	BCKDK	[3-methyl-2-oxobutanoate dehydrogenase [lipoamide]] kinase, mitochondrial OS=Homo sapiens GN=BCKDK PE=1 SV=2	47.5728	46.3	3.49775e+08	223182836	5.32389e+07	3.4781e+08	3.37452e+08	344376839	1.50324e+08	2.04981e+08	2.40284e+08
Q07817	BCL2L1	Bcl-2-like protein 1 OS=Homo sapiens GN=BCL2L1 PE=1 SV=1	33.9056	26	5.05642e+08	5.43825e+08	5.25323e+08	2.36869e+08	2.15608e+08	4.86929e+08	2.03793e+08	1.38553e+08	1.92741e+08
O43521	BCL2L11	Bcl-2-like protein 11 OS=Homo sapiens GN=BCL2L11 PE=1 SV=1	5.55556	22.2								8.80222e+06
Q9HB09	BCL2L12	Bcl-2-like protein 12 OS=Homo sapiens GN=BCL2L12 PE=1 SV=1	8.38323	36.8		1.38868e+07					8.38338e+06
Q9BXK5	BCL2L13	Bcl-2-like protein 13 OS=Homo sapiens GN=BCL2L13 PE=1 SV=1	16.2887	52.7	3.13095e+07	3.77288e+07		3.95901e+07		2.86049e+07	35058292	4.94279e+06	10099346
Q92843	BCL2L2	Bcl-2-like protein 2 OS=Homo sapiens GN=BCL2L2 PE=1 SV=1	34.1969	20.8				5.25941e+07	1.3213e+07			1.76657e+06
Q4VC05	BCL7A	B-cell CLL/lymphoma 7 protein family member A OS=Homo sapiens GN=BCL7A PE=1 SV=1	12.8571	22.8	3.67604e+07	1.22614e+07	3.57618e+07		10448148
Q8WUZ0	BCL7C	B-cell CLL/lymphoma 7 protein family member C OS=Homo sapiens GN=BCL7C PE=1 SV=2	13.8249	23.4	90278438	83351396	48597563	9.5944e+07		6.48884e+07			1.88776e+07
Q86UU0	BCL9L	B-cell CLL/lymphoma 9-like protein OS=Homo sapiens GN=BCL9L PE=1 SV=1	2.33489	157								1.33223e+07
Q9NYF8	BCLAF1	Bcl-2-associated transcription factor 1 OS=Homo sapiens GN=BCLAF1 PE=1 SV=2	30.4348	106.1	1.02129e+09	1.02493e+09	1087926973	5.56948e+08	9.22137e+08	6.86257e+08	8.63799e+08	5.65993e+08	1.06909e+09
Q6W2J9	BCOR	BCL-6 corepressor OS=Homo sapiens GN=BCOR PE=1 SV=1	0.683761	192.1
P11274	BCR	Breakpoint cluster region protein OS=Homo sapiens GN=BCR PE=1 SV=2	4.01259	142.7						9.79031e+06			7.08698e+06
Q9Y276	BCS1L	Mitochondrial chaperone BCS1 OS=Homo sapiens GN=BCS1L PE=1 SV=1	66.8258	47.5	2.71502e+08	2.7884e+08	2.81133e+08	2.83623e+08	2.64801e+08	3.27124e+08	2.23389e+08	1.23883e+08	2.80493e+08
Q02338	BDH1	D-beta-hydroxybutyrate dehydrogenase, mitochondrial OS=Homo sapiens GN=BDH1 PE=1 SV=3	45.1895	38.1	131703298	1.81312e+08	2.21198e+08	1.28748e+08	99979171	1.65461e+08	1.54211e+08	7.85719e+07	1.78812e+08
Q9BUT1	BDH2	3-hydroxybutyrate dehydrogenase type 2 OS=Homo sapiens GN=BDH2 PE=1 SV=2	10.2041	26.7							4.49471e+07	5.93388e+07
Q14457	BECN1	Beclin-1 OS=Homo sapiens GN=BECN1 PE=1 SV=2	2.22222	51.9								5044339
Q5T5X7	BEND3	BEN domain-containing protein 3 OS=Homo sapiens GN=BEND3 PE=1 SV=1	15.7005	94.4	3.95421e+07	2.95167e+07	6.64019e+07	1.70189e+07	2.90133e+07	3.58466e+07	3.36823e+07	2.02892e+07	23956760
O15155	BET1	BET1 homolog OS=Homo sapiens GN=BET1 PE=1 SV=1	24.5763	13.3	2.88175e+08	2.69173e+08	374170254	395375338	2.80939e+08	2.80574e+08	2.66521e+08	240936998	2.14311e+08
Q9NYM9	BET1L	BET1-like protein OS=Homo sapiens GN=BET1L PE=1 SV=1	44.1441	12.4	64065926	1.26569e+08	132175691	1.15646e+08	1.02619e+08	1.03734e+08	102037221	70462017	9.14975e+07
Q93088	BHMT	Betaine--homocysteine S-methyltransferase 1 OS=Homo sapiens GN=BHMT PE=1 SV=2	24.1379	45		2.45627e+07	4.68326e+07				23772191	6.56691e+06	23868212
Q9H2M3	BHMT2	Betaine--homocysteine S-methyltransferase 2 OS=Homo sapiens GN=BHMT2 PE=1 SV=1	10.7438	40.3		6.06496e+07				15573412	84565998	4.90127e+07
Q8TD16	BICD2	Protein bicaudal D homolog 2 OS=Homo sapiens GN=BICD2 PE=1 SV=1	20.1456	93.5	1.09535e+07	3.15207e+07	1.86122e+07	2.88014e+07	1.62252e+07	8883584	2.07924e+07	1.51818e+07	2.96685e+07
P55957	BID	BH3-interacting domain death agonist OS=Homo sapiens GN=BID PE=1 SV=1	47.1795	22	9.59686e+07	1.05855e+08	1.12065e+08	1.10829e+08	8.73152e+07	1.10518e+08	1.11829e+08	6.09134e+07	1.2537e+08
O00499	BIN1	Myc box-dependent-interacting protein 1 OS=Homo sapiens GN=BIN1 PE=1 SV=1	23.1029	64.7	8.49839e+07	7.07847e+07	6.39858e+07	4.5083e+07	97325874	1.13705e+08	8.12559e+07	3.52585e+07	6.97098e+07
Q13490	BIRC2	Baculoviral IAP repeat-containing protein 2 OS=Homo sapiens GN=BIRC2 PE=1 SV=2	2.589	69.9
O15392	BIRC5	Baculoviral IAP repeat-containing protein 5 OS=Homo sapiens GN=BIRC5 PE=1 SV=2	39.4366	16.4			14883856				1.11975e+07	19724402	1.73888e+07
Q9NR09	BIRC6	Baculoviral IAP repeat-containing protein 6 OS=Homo sapiens GN=BIRC6 PE=1 SV=1	5.57051	527.3	35505484	5.15808e+07	3.48724e+07	4.59837e+07	5.83126e+07	4.14488e+07	3.94281e+07	1.97196e+07	4.62988e+07
P54132	BLM	Bloom syndrome protein OS=Homo sapiens GN=BLM PE=1 SV=1	1.34086	158.9	61136072	541436224	4.79731e+08	3.35644e+08	447960703	386994862	116256828	307142753	459996568
Q13867	BLMH	Bleomycin hydrolase OS=Homo sapiens GN=BLMH PE=1 SV=1	34.0659	52.5	2.43824e+08	2.25302e+08	2.64233e+08	2.52903e+08	2.1374e+08	2.54634e+08	2.15321e+08	1.66697e+08	2.52184e+08
P78537	BLOC1S1	Biogenesis of lysosome-related organelles complex 1 subunit 1 OS=Homo sapiens GN=BLOC1S1 PE=1 SV=1	39.2	14.3	3.8039e+07	3.71245e+07					4.24817e+07		6.27091e+07
Q6QNY1	BLOC1S2	Biogenesis of lysosome-related organelles complex 1 subunit 2 OS=Homo sapiens GN=BLOC1S2 PE=1 SV=1	38.7324	16	3.68326e+07	6.77695e+07	4.06591e+07	8.72874e+07	9.7533e+07	7.57093e+07	7.60858e+07	3.2836e+07	76503388
Q6QNY0	BLOC1S3	Biogenesis of lysosome-related organelles complex 1 subunit 3 OS=Homo sapiens GN=BLOC1S3 PE=1 SV=1	17.3267	21.2
Q9NUP1	BLOC1S4	Protein cappuccino homolog OS=Homo sapiens GN=CNO PE=1 SV=1	5.52995	23.3			4.05416e+07	5.51001e+07	3.41839e+07	3.69843e+07		1.44158e+07	3.408e+07
Q8TDH9	BLOC1S5	Protein Muted homolog OS=Homo sapiens GN=MUTED PE=1 SV=1	6.95187	21.6				8.77852e+06
Q9UL45	BLOC1S6	Pallidin OS=Homo sapiens GN=PLDN PE=1 SV=1	11.0465	19.7	65638358	75008343	8.73633e+07	77359516	82268742	8.96336e+07	6.44749e+07		59037159
P53004	BLVRA	Biliverdin reductase A OS=Homo sapiens GN=BLVRA PE=1 SV=2	58.4459	33.4	3.19287e+08	3.54503e+08	3.90498e+08	4.11575e+08	3.66776e+08	4.37611e+08	3.33222e+08	2.58121e+08	4.35518e+08
P30043	BLVRB	Flavin reductase OS=Homo sapiens GN=BLVRB PE=1 SV=3	57.767	22.1	8.97047e+08	9.11027e+08	1.00333e+09	1.02253e+09	939934126	1.08848e+09	1.04458e+09	6.21164e+08	1.05049e+09
P35226	BMI1	Polycomb complex protein BMI-1 OS=Homo sapiens GN=BMI1 PE=1 SV=2	7.97546	36.9							6.59824e+06
Q9NSY1	BMP2K	BMP-2-inducible protein kinase OS=Homo sapiens GN=BMP2K PE=1 SV=2	2.84238	129.1
P36894	BMPR1A	Bone morphogenetic protein receptor type-1A OS=Homo sapiens GN=BMPR1A PE=1 SV=2	8.08271	60.2		69990498	55961786	13460934	14203934	18755012	4.3654e+07	47079296	1.52662e+07
Q14692	BMS1	Ribosome biogenesis protein BMS1 homolog OS=Homo sapiens GN=BMS1 PE=1 SV=1	47.9719	145.7	4.84433e+08	4.93903e+08	5.30974e+08	4.84798e+08	4.34626e+08	4.83652e+08	4.78189e+08	3.19676e+08	4.6354e+08
Q12981	BNIP1	Vesicle transport protein SEC20 OS=Homo sapiens GN=BNIP1 PE=1 SV=3	49.1228	26.1	1.63564e+08	1.61184e+08	1.71673e+08	1.63265e+08	155548009	1.46149e+08	1.27635e+08	8.89548e+07	1.06858e+08
Q12982	BNIP2	BCL2/adenovirus E1B 19 kDa protein-interacting protein 2 OS=Homo sapiens GN=BNIP2 PE=1 SV=1	6.36943	36			1.10002e+07		5300732	1.17493e+07			9.52182e+06
Q12983	BNIP3	BCL2/adenovirus E1B 19 kDa protein-interacting protein 3 OS=Homo sapiens GN=BNIP3 PE=1 SV=2	21.134	21.5								3.49574e+07
Q96IK1	BOD1	Biorientation of chromosomes in cell division protein 1 OS=Homo sapiens GN=BOD1 PE=1 SV=2	16.7568	19.2									8.60042e+06
Q8NFC6	BOD1L1	Biorientation of chromosomes in cell division protein 1-like OS=Homo sapiens GN=BOD1L PE=1 SV=2	5.11308	330.3	2.69067e+07	4.94416e+07	1.46147e+07		2.81677e+07	4.40927e+07	40989799	3.29506e+07
Q9UMX3	BOK	Bcl-2-related ovarian killer protein OS=Homo sapiens GN=BOK PE=2 SV=1	16.0377	23.3			5.74607e+07		45611102		2.73676e+07	2.23249e+07
Q9H3K6	BOLA2	BolA-like protein 2 OS=Homo sapiens GN=BOLA2 PE=1 SV=1	72.093	10.1	7.96462e+08	7.28536e+08	8.55578e+08	9.31191e+08	8.67956e+08	8.97757e+08	8.78665e+08	4.43969e+08	8.91338e+08
Q53S33	BOLA3	BolA-like protein 3 OS=Homo sapiens GN=BOLA3 PE=2 SV=1	29.9065	12.1	1.39635e+08	1.40861e+08	2.09693e+08	209501181	1.97018e+08	1.94983e+08	1.64605e+08	148148020	1.04106e+08
Q14137	BOP1	Ribosome biogenesis protein BOP1 OS=Homo sapiens GN=BOP1 PE=1 SV=2	51.4745	83.6	1.21767e+09	1.19565e+09	1.31441e+09	1.34602e+09	1100436179	1.19582e+09	1.15753e+09	8.42636e+08	1.102e+09
Q969J3	BORCS5	Loss of heterozygosity 12 chromosomal region 1 protein OS=Homo sapiens GN=LOH12CR1 PE=1 SV=1	6.12245	22.2							1.68633e+07
Q96GS4	BORCS6	Uncharacterized protein C17orf59 OS=Homo sapiens GN=C17orf59 PE=1 SV=1	9.41704	23.6								4.88122e+06	4.8506e+06
Q96B45	BORCS7	UPF0693 protein C10orf32 OS=Homo sapiens GN=C10orf32 PE=1 SV=1	16.1905	11.6								3.22163e+06
Q86WA6	BPHL	Valacyclovir hydrolase OS=Homo sapiens GN=BPHL PE=1 SV=1	44.3299	32.5	176079799	1.76081e+08	2.09723e+08	1.43177e+08	1.7965e+08	1.92826e+08	1.73415e+08	6.84552e+07	213615946
Q8N4F0	BPIFB2	Bactericidal/permeability-increasing protein-like 1 OS=Homo sapiens GN=BPIL1 PE=1 SV=2	9.82533	49.1	6768979	1.93339e+07	21238072	1.79179e+07	2.29288e+07	15275399	9.92758e+06	6.55844e+06	5.53894e+06
O95861	BPNT1	3'(2'),5'-bisphosphate nucleotidase 1 OS=Homo sapiens GN=BPNT1 PE=1 SV=1	63.3117	33.4	1.72165e+08	2.05426e+08	2.33836e+08	2.55268e+08	249601562	1.94727e+08	223247237	1.54015e+08	2.56124e+08
Q9NX62	BPNT2	Inositol monophosphatase 3 OS=Homo sapiens GN=IMPAD1 PE=1 SV=1	47.0752	38.7	4.07319e+08	3.81253e+08	4.32016e+08	3.94196e+08	3.44015e+08	3.76308e+08	3.1159e+08	2.00578e+08	3.71809e+08
Q12830	BPTF	Nucleosome-remodeling factor subunit BPTF OS=Homo sapiens GN=BPTF PE=1 SV=3	12.7052	338.1	1.17e+08	1.12523e+08	1.34139e+08	1.18173e+08	1.16075e+08	8.90324e+07	6.3578e+07	5.1757e+07	8.8254e+07
Q6PJG6	BRAT1	HEAT repeat-containing protein C7orf27 OS=Homo sapiens GN=C7orf27 PE=1 SV=2	25.0914	88.1	2.20405e+07	1.84243e+07	3.40796e+07	3.32853e+07	3.27896e+06	2.99519e+07	2.16945e+07	1.43737e+07	3.77099e+07
Q69YU5	BRAWNIN	Uncharacterized protein C12orf73 OS=Homo sapiens GN=C12orf73 PE=2 SV=2	19.7183	8					1.05132e+07		6.04305e+06		8.3227e+06
P46736	BRCC3	Lys-63-specific deubiquitinase BRCC36 OS=Homo sapiens GN=BRCC3 PE=1 SV=2	24.6835	36	3.70421e+07	3.88879e+07	4.72373e+07	2.09212e+07	1.89751e+07	6.65962e+07	41732902	2.68705e+07	4.74238e+07
O95696	BRD1	Bromodomain-containing protein 1 OS=Homo sapiens GN=BRD1 PE=1 SV=1	4.15879	119.4		19205904		6309727	6.9296e+06				1.03982e+07
P25440	BRD2	Bromodomain-containing protein 2 OS=Homo sapiens GN=BRD2 PE=1 SV=2	26.2172	88	1.13481e+07	7.02561e+07		3.97869e+07		4.06892e+07	22919438	4.63753e+07	3.58407e+07
Q15059	BRD3	Bromodomain-containing protein 3 OS=Homo sapiens GN=BRD3 PE=1 SV=1	29.3388	79.5	1.13486e+08	1.26858e+08	1.41934e+08	7.73116e+07	8.39963e+07	8.23513e+07	1.18492e+08	7.15727e+07	5.7872e+07
O60885	BRD4	Bromodomain-containing protein 4 OS=Homo sapiens GN=BRD4 PE=1 SV=2	15.6388	152.1	2.38042e+08	2.72171e+08	2.43102e+08	1.80564e+08	1.71455e+08	1.88247e+08	1.9241e+08	1.12521e+08	1.64468e+08
Q9NPI1	BRD7	Bromodomain-containing protein 7 OS=Homo sapiens GN=BRD7 PE=1 SV=1	7.21966	74.1			19907608			2.31929e+07	2.11239e+07	6.98445e+06	15151466
Q9H0E9	BRD8	Bromodomain-containing protein 8 OS=Homo sapiens GN=BRD8 PE=1 SV=1	7.12551	135.3				1.87619e+07		5.1424e+07	1.9157e+07		18540164
Q92994	BRF1	Transcription factor IIIB 90 kDa subunit OS=Homo sapiens GN=BRF1 PE=1 SV=1	2.21566	73.8
Q9HAW0	BRF2	Transcription factor IIIB 50 kDa subunit OS=Homo sapiens GN=BRF2 PE=1 SV=1	2.38663	46.5
Q8WY22	BRI3BP	BRI3-binding protein OS=Homo sapiens GN=BRI3BP PE=1 SV=1	14.3426	27.8	3.44589e+08	3.18738e+08	8.06123e+07	4.26509e+08	4.31918e+08	4.05664e+08	4.57417e+08	2.93746e+08	347770960
Q8TDN6	BRIX1	Ribosome biogenesis protein BRX1 homolog OS=Homo sapiens GN=BRIX1 PE=1 SV=2	60.3399	41.4	1.1226e+09	1463385550	1.60492e+09	1.52719e+09	9.22539e+08	1.62797e+09	1.36193e+09	6.07486e+08	1.52147e+09
Q8WUW1	BRK1	Probable protein BRICK1 OS=Homo sapiens GN=C3orf10 PE=1 SV=1	44	8.7	2.8117e+08		240942544	2.01739e+08	2.63396e+08	2.50421e+08	2.63711e+08	1.51958e+08	3.09253e+08
Q5PSV4	BRMS1L	Breast cancer metastasis-suppressor 1-like protein OS=Homo sapiens GN=BRMS1L PE=1 SV=2	24.1486	37.6	3.85024e+07		6.51621e+07	1.00867e+08	7.72251e+07	9.15111e+07	38947274	1.32703e+07	7.75212e+07
Q5VW32	BROX	BRO1 domain-containing protein BROX OS=Homo sapiens GN=BROX PE=1 SV=1	31.8735	46.4	136141312	1.02197e+08	1.27865e+08		71164899	4.61255e+07	116802672	1.01221e+08	6.16528e+07
P55201	BRPF1	Peregrin OS=Homo sapiens GN=BRPF1 PE=1 SV=2	3.29489	137.4	1.08332e+07	1.33278e+07
Q9ULD4	BRPF3	Bromodomain and PHD finger-containing protein 3 OS=Homo sapiens GN=BRPF3 PE=1 SV=2	1.49378	135.7
Q96G97	BSCL2	Seipin OS=Homo sapiens GN=BSCL2 PE=1 SV=3	2.26131	44.4
Q9NW68	BSDC1	BSD domain-containing protein 1 OS=Homo sapiens GN=BSDC1 PE=2 SV=1	25.5814	47.1	6.39931e+07	6.36243e+07	112583868	8.38106e+07	3.56284e+07	77989486	4.00665e+07	3.17687e+07	5.23871e+07
P35613	BSG	Basigin OS=Homo sapiens GN=BSG PE=1 SV=2	36.6234	42.2	6.4256e+09	6.66605e+09	6512719086	5.9669e+09	6.00652e+09	6.12658e+09	5.02071e+09	4.55961e+09	5.34124e+09
Q10589	BST2	Bone marrow stromal antigen 2 OS=Homo sapiens GN=BST2 PE=1 SV=1	13.8889	19.8							354629466		78910416
O14981	BTAF1	TATA-binding protein-associated factor 172 OS=Homo sapiens GN=BTAF1 PE=1 SV=2	29.5295	206.8	1.56997e+08	1.7272e+08	2.02478e+08	1.71141e+08	1.63343e+08	189391128	1.35345e+08	1.04418e+08	151636590
Q9H0C5	BTBD1	BTB/POZ domain-containing protein 1 OS=Homo sapiens GN=BTBD1 PE=1 SV=1	4.56432	52.7
Q9BX70	BTBD2	BTB/POZ domain-containing protein 2 OS=Homo sapiens GN=BTBD2 PE=1 SV=1	7.42857	55.9								52525705
P20290	BTF3	Transcription factor BTF3 OS=Homo sapiens GN=BTF3 PE=1 SV=1	66.0194	22.2	1.11464e+09	1066389438	1.25336e+09	1188484084	1051744784	1351226608	1.14201e+09	7.07574e+08	1.43818e+09
Q96K17	BTF3L4	Transcription factor BTF3 homolog 4 OS=Homo sapiens GN=BTF3L4 PE=1 SV=1	38.6076	17.3	1.43501e+08	1.38989e+08	1.54893e+08	1.40664e+08	1.88077e+08	1.60133e+08	1.63798e+08	9.19731e+07	1.53879e+08
Q7KYR7	BTN2A1	Butyrophilin subfamily 2 member A1 OS=Homo sapiens GN=BTN2A1 PE=1 SV=3	16.129	59.6	1.77112e+07	28619241	4.32449e+07	2.04187e+07	1.37244e+07	39864478
P78410	BTN3A2	Butyrophilin subfamily 3 member A2 OS=Homo sapiens GN=BTN3A2 PE=1 SV=2	8.38323	36.4
Q9Y297	BTRC	F-box/WD repeat-containing protein 1A OS=Homo sapiens GN=BTRC PE=1 SV=1	4.79339	68.8				6915555		4637868		2.07004e+07
O43683	BUB1	Mitotic checkpoint serine/threonine-protein kinase BUB1 OS=Homo sapiens GN=BUB1 PE=1 SV=1	1.10599	122.3									3.32002e+06
O60566	BUB1B	Mitotic checkpoint serine/threonine-protein kinase BUB1 beta OS=Homo sapiens GN=BUB1B PE=1 SV=3	3.04762	119.5					3544174668
O43684	BUB3	Mitotic checkpoint protein BUB3 OS=Homo sapiens GN=BUB3 PE=1 SV=1	67.9878	37.1	1.41181e+09	1.44028e+09	1.64902e+09	1.26357e+09	1.11748e+09	1.16486e+09	1.2897e+09	8.69844e+08	1.19832e+09
Q9BRD0	BUD13	BUD13 homolog OS=Homo sapiens GN=BUD13 PE=1 SV=1	3.71567	70.5	30515370							34548091
O43709	BUD23	Uncharacterized methyltransferase WBSCR22 OS=Homo sapiens GN=WBSCR22 PE=1 SV=2	19.9288	31.9	112902707	8.74662e+07		93661759	139552888	89713334	1.50133e+08	1.18145e+08	1.434e+08
P41223	BUD31	Protein BUD31 homolog OS=Homo sapiens GN=BUD31 PE=1 SV=2	34.0278	17	1.33191e+08	1.96827e+08	1.85707e+08	2.50719e+08	2.28697e+08	2.29054e+08	1.22178e+08	5.83065e+07	2.28242e+08
Q13895	BYSL	Bystin OS=Homo sapiens GN=BYSL PE=1 SV=3	45.3089	49.6	3.05439e+08	2.89212e+08	4.12091e+08	2.76472e+08	3.00108e+08	3.10257e+08	3.60489e+08	1.90808e+08	3.27945e+08
Q7L1Q6	BZW1	Basic leucine zipper and W2 domain-containing protein 1 OS=Homo sapiens GN=BZW1 PE=1 SV=1	69.2124	48	1.41532e+09	1.15347e+09	1.65971e+09	1240483248	1.07099e+09	1.11087e+09	1.00091e+09	7.05781e+08	1.65557e+09
Q9Y6E2	BZW2	Basic leucine zipper and W2 domain-containing protein 2 OS=Homo sapiens GN=BZW2 PE=1 SV=1	36.0382	48.1	2.92685e+08	3.36985e+08	347707741	2.8388e+08	3.21428e+08	352039525	1.96482e+08	2.06422e+08	3.78477e+08
Q9H0W9	C11orf54	Ester hydrolase C11orf54 OS=Homo sapiens GN=C11orf54 PE=1 SV=1	39.3651	35.1	7.7458e+07	1.09781e+08	1.31203e+08	9.48286e+07	8.12257e+07	9.32045e+07	103884421	8.05069e+07	1.16174e+08
Q9H3H3	C11orf68	UPF0696 protein C11orf68 OS=Homo sapiens GN=C11orf68 PE=1 SV=1	21.1155	27.4			6.64364e+06	4.6208e+07		39665397	3.185e+07	1.40724e+07	5.95543e+06
Q99622	C12orf57	Protein C10 OS=Homo sapiens GN=C12orf57 PE=1 SV=1	26.1905	13.2	3.32896e+07	3.25573e+07		3.48595e+07	3.99039e+07	4.22265e+07	3.67617e+07	1.98877e+07	52870758
Q9NWQ9	C14orf119	Uncharacterized protein C14orf119 OS=Homo sapiens GN=C14orf119 PE=2 SV=1	14.2857	16							2.34031e+07	1.54354e+07
Q6ZRI6	C15orf39	Uncharacterized protein C15orf39 OS=Homo sapiens GN=C15orf39 PE=1 SV=2	1.14613	110.7			4.50426e+06			3.85334e+06
Q8WUR7	C15orf40	UPF0235 protein C15orf40 OS=Homo sapiens GN=C15orf40 PE=1 SV=1	13.4921	13.3	1.22252e+07				6.93745e+07	6.37424e+07		2.95908e+07
Q14CZ0	C16orf72	UPF0472 protein C16orf72 OS=Homo sapiens GN=C16orf72 PE=1 SV=1	6.54545	30.9
Q6PH81	C16orf87	UPF0547 protein C16orf87 OS=Homo sapiens GN=C16orf87 PE=2 SV=1	17.5325	17.8		12540133	2.21691e+07
Q9HAS0	C17orf75	Protein Njmu-R1 OS=Homo sapiens GN=C17orf75 PE=1 SV=2	12.8788	44.6	5.40902e+07	3.0662e+07	5.03745e+07	4.15835e+07	3.68678e+07	3.83102e+07	5.24029e+07	2.86221e+07	5.60457e+07
Q96B23	C18orf25	Uncharacterized protein C18orf25 OS=Homo sapiens GN=C18orf25 PE=1 SV=2	4.71464	43.3	1.9544e+07		1.58261e+07
Q68DL7	C18orf63	Uncharacterized protein DKFZp781G0119 OS=Homo sapiens PE=2 SV=2	1.16788	77.2
Q9UFG5	C19orf25	UPF0449 protein C19orf25 OS=Homo sapiens GN=C19orf25 PE=1 SV=2	50	12.9	1.12005e+08	1.34188e+08	1.42242e+08	1.49146e+08	1.07038e+08	1.35763e+08	1.334e+08	8.46089e+07	177575042
Q8N9M1	C19orf47	Uncharacterized protein C19orf47 OS=Homo sapiens GN=C19orf47 PE=1 SV=1	4.73934	44.7
Q13901	C1D	Nuclear nucleic acid-binding protein C1D OS=Homo sapiens GN=C1D PE=1 SV=1	5.67376	16						1.39502e+08
Q9NS00	C1GALT1	Glycoprotein-N-acetylgalactosamine 3-beta-galactosyltransferase 1 OS=Homo sapiens GN=C1GALT1 PE=1 SV=1	39.6694	42.2	1.54119e+08	1.82031e+08	1.82644e+08	1.43969e+08	1.26454e+08	1.39653e+08	1.02485e+08	9.56958e+07	1.66436e+08
Q96EU7	C1GALT1C1	C1GALT1-specific chaperone 1 OS=Homo sapiens GN=C1GALT1C1 PE=1 SV=1	32.3899	36.4	7.19073e+07	5.29247e+07	7.26187e+07	113511597	8.23531e+07	8.2606e+07	7.32551e+07	3.64678e+07	6.03345e+07
Q9NSG2	C1orf112	Uncharacterized protein C1orf112 OS=Homo sapiens GN=C1orf112 PE=1 SV=1	3.63423	96.5							2.81501e+06
Q6ZSJ8	C1orf122	Uncharacterized protein C1orf122 OS=Homo sapiens GN=C1orf122 PE=2 SV=2	22.7273	11.5	6.10052e+07	82479007					9.0226e+07	3.83145e+07
Q8NDD1	C1orf131	Uncharacterized protein C1orf131 OS=Homo sapiens GN=C1orf131 PE=1 SV=3	18.0272	32.7	5.17438e+07	63819773	7.18078e+07				5.12198e+07	3.59862e+07	66858716
Q5SNV9	C1orf167	Uncharacterized protein C1orf167 OS=Homo sapiens GN=C1orf167 PE=2 SV=2	0.544959	162.3				251629351		1.86596e+08	101133802	204305405	1.05553e+08
Q8IYL3	C1orf174	UPF0688 protein C1orf174 OS=Homo sapiens GN=C1orf174 PE=1 SV=2	5.76132	26								7.67524e+07
Q9BV19	C1orf50	Uncharacterized protein C1orf50 OS=Homo sapiens GN=C1orf50 PE=2 SV=2	11.5578	21.9	5.71618e+07	5.57046e+07		4.09545e+07		2.46963e+07			3.55612e+06
Q07021	C1QBP	Complement component 1 Q subcomponent-binding protein, mitochondrial OS=Homo sapiens GN=C1QBP PE=1 SV=1	60.6383	31.3	1.2639e+10	1.15732e+10	1.24511e+10	1.23536e+10	1.18107e+10	1.27822e+10	1.11953e+10	7.58072e+09	1.10056e+10
P06681	C2	Complement C2 OS=Homo sapiens GN=C2 PE=1 SV=2	17.4202	83.2	7.23965e+07	9.46293e+07	3.31999e+06	1.0438e+08	8.00491e+07	1.28637e+08	1.19185e+08	9.23879e+07	1.2593e+08
Q9GZN8	C20orf27	UPF0687 protein C20orf27 OS=Homo sapiens GN=C20orf27 PE=1 SV=3	42.5287	19.3	255518952	2.4847e+08	1.61197e+08	2.13476e+08	2.22907e+08	2.38344e+08	1.99492e+08	1.31994e+08	2.46362e+08
Q9Y426	C2CD2	C2 domain-containing protein 2 OS=Homo sapiens GN=C2CD2 PE=1 SV=2	4.74138	75.5	6.82559e+06	5945403	6.41052e+06	1.97637e+07		7.30928e+06
O14523	C2CD2L	C2 domain-containing protein 2-like OS=Homo sapiens GN=C2CD2L PE=1 SV=3	4.95751	76.1
Q86YS7	C2CD5	Uncharacterized protein KIAA0528 OS=Homo sapiens GN=KIAA0528 PE=1 SV=1	7.5	110.4	20794073	21925929	2.98233e+07
Q9BVC5	C2orf49	Ashwin OS=Homo sapiens GN=C2orf49 PE=1 SV=1	40.0862	25.8	9.53382e+07	8.68193e+07	1.6597e+08	1.52258e+08	8.71955e+07	1.08242e+08	1.15349e+08	1.97203e+07	1.31344e+08
Q8N8R5	C2orf69	UPF0565 protein C2orf69 OS=Homo sapiens GN=C2orf69 PE=2 SV=1	13.7662	43.4		1.63123e+07	7.2392e+06						1.21359e+07
A6NCS6	C2orf72	Uncharacterized protein C2orf72 OS=Homo sapiens GN=C2orf72 PE=2 SV=1	28.5714	17.4	1.96772e+08	1.85015e+08	1.88593e+08	2.30569e+08	1.8119e+08	1.98127e+08	1.62894e+08	9.67905e+07	1.64417e+08
P01024	C3	Complement C3 OS=Homo sapiens GN=C3 PE=1 SV=2	61.8761	187	4.59629e+08	4.52749e+08	4.97005e+08	4.61262e+08	5.05152e+08	5.09614e+08	7.29178e+08	2.45376e+08	7.11679e+08
Q6P1S2	C3orf33	Uncharacterized protein C3orf33 OS=Homo sapiens GN=C3orf33 PE=1 SV=1	28.9116	33.8	2.36696e+07	35963358	4.11794e+07	5.86981e+07	4.86889e+07	52498538	22313886	9.96597e+06	2.24324e+07
Q5JPI3	C3orf38	Uncharacterized protein C3orf38 OS=Homo sapiens GN=C3orf38 PE=2 SV=1	18.845	37.5	2.32114e+07	18528447	24812943		9.97182e+06	1.39876e+07	1.18432e+07	3.19046e+07
P0C0L4	C4A	Complement C4-A OS=Homo sapiens GN=C4A PE=1 SV=1	53.6697	192.7	291300640	350305540	321800794	488562520	414969658	458458216	388658781	280189906	350280026
P0C0L5	C4B	Complement C4-B OS=Homo sapiens GN=C4B PE=1 SV=1	53.6697	192.7	112349674		167924992	1.4658e+08	1.32204e+08	166065742	1.42992e+08	9.01049e+07	1.20803e+08
P04003	C4BPA	C4b-binding protein alpha chain OS=Homo sapiens GN=C4BPA PE=1 SV=2	17.5879	67	9.4499e+07	1.00243e+08	6.0229e+07	1.53647e+08	63963621	1.84321e+08	1.5414e+08	2.50365e+07	7.88629e+07
P20851	C4BPB	C4b-binding protein beta chain OS=Homo sapiens GN=C4BPB PE=1 SV=1	13.8889	28.3				22581863	3.0938e+07	5.68371e+07	2.68115e+07		1.8084e+07
P01031	C5	Complement C5 OS=Homo sapiens GN=C5 PE=1 SV=4	2.74463	188.2	3.63704e+07	3.11761e+07	5.84049e+08	32265200	4.03423e+07	26597434
Q49AR2	C5orf22	UPF0489 protein C5orf22 OS=Homo sapiens GN=C5orf22 PE=1 SV=2	4.0724	49.9			1.92367e+07	3.19073e+07	2.67889e+07	3.59977e+07	2.88172e+07
A6NDU8	C5orf51	UPF0600 protein C5orf51 OS=Homo sapiens GN=C5orf51 PE=1 SV=1	7.82313	33.6	2.83174e+06	4.58579e+07		26820245	3.89825e+07	4.83602e+07	53285119	4.58738e+06	38284414
P13671	C6	Complement component C6 OS=Homo sapiens GN=C6 PE=1 SV=3	1.71306	104.7
Q7Z4R8	C6orf120	UPF0669 protein C6orf120 OS=Homo sapiens GN=C6orf120 PE=1 SV=1	46.5969	20.8	2.92234e+08	3.04597e+08	3.16481e+08	3.20794e+08	271811103	2.94463e+08	2.92479e+08	2.4018e+08	3.54993e+08
Q5SQH8	C6orf136	Uncharacterized protein C6orf136 OS=Homo sapiens GN=C6orf136 PE=2 SV=1	3.80952	35.8
Q5TEZ5	C6orf163	Uncharacterized protein C6orf163 OS=Homo sapiens GN=C6orf163 PE=1 SV=2	3.34347	38.5		113289306	127144056				1.66142e+08	9.2096e+07	154305866
O95873	C6orf47	Uncharacterized protein C6orf47 OS=Homo sapiens GN=C6orf47 PE=1 SV=1	6.12245	31.8	1.07484e+07	1.01397e+07	4.62008e+07
Q6UWU4	C6orf89	Uncharacterized protein C6orf89 OS=Homo sapiens GN=C6orf89 PE=2 SV=1	3.7464	39.8	6.16681e+06
Q96N11	C7orf26	Uncharacterized protein C7orf26 OS=Homo sapiens GN=C7orf26 PE=2 SV=1	14.922	50	2.49357e+07	5.17747e+07	40828580	2.87674e+07	1.10575e+07	2.72745e+07	3.61647e+07	3.0777e+07	2.27511e+07
Q9BRJ6	C7orf50	Uncharacterized protein C7orf50 OS=Homo sapiens GN=C7orf50 PE=1 SV=1	52.5773	22.1	3.49726e+08	3.02445e+08	3.90037e+08	3.77741e+08	3.24672e+08	3.10531e+08	3.96381e+08	2.90657e+08	3.73144e+08
P07360	C8G	Complement component C8 gamma chain OS=Homo sapiens GN=C8G PE=1 SV=3	31.6832	22.3	2.60895e+07	2.95175e+07	1.4822e+07					2.20918e+06
Q9H7E9	C8orf33	UPF0488 protein C8orf33 OS=Homo sapiens GN=C8orf33 PE=1 SV=1	11.7904	25	112931756	77800355	1.20617e+08		3.56769e+07	3.8751e+07	6.17143e+07
Q6P1X6	C8orf82	UPF0598 protein C8orf82 OS=Homo sapiens GN=C8orf82 PE=2 SV=2	34.7222	23.9	154786597	1.19615e+08	1.35393e+08	1.76638e+08	1.40321e+08	1.43294e+08	1.52566e+08	9.33135e+07	1.7176e+08
P02748	C9	Complement component C9 OS=Homo sapiens GN=C9 PE=1 SV=2	3.75671	63.1		101370171	1.15809e+08	5.67978e+07	1.13184e+08		101948329	73507593	105601291
Q5T6V5	C9orf64	UPF0553 protein C9orf64 OS=Homo sapiens GN=C9orf64 PE=1 SV=1	33.4311	39	125980715	1.16575e+08	1.50251e+08	1.12808e+08	2.32192e+08	1.63952e+08	1.453e+08	9.18647e+07	1.28587e+08
Q9NZ63	C9orf78	Uncharacterized protein C9orf78 OS=Homo sapiens GN=C9orf78 PE=1 SV=1	22.1453	33.7	2.38163e+07	2.13929e+07	44388075	3.18455e+07	23322028	3.06477e+07	1.00099e+08	3.76864e+07	39023184
Q8N1Q1	CA13	Carbonic anhydrase 13 OS=Homo sapiens GN=CA13 PE=1 SV=1	13.7405	29.4	3.97998e+07	33905959	4.25495e+07			41618067		32999161
P35218	CA5A	Carbonic anhydrase 5A, mitochondrial OS=Homo sapiens GN=CA5A PE=1 SV=1	2.95082	34.7
Q16790	CA9	Carbonic anhydrase 9 OS=Homo sapiens GN=CA9 PE=1 SV=2	9.36819	49.7	3.87514e+06	55004375
Q9H8G2	CAAP1	Uncharacterized protein C9orf82 OS=Homo sapiens GN=C9orf82 PE=1 SV=2	9.9723	38.3	2.58957e+07	24989412	41774762	17802482	23240987	27738664	35234905	1.83529e+07	31801811
Q9Y376	CAB39	Calcium-binding protein 39 OS=Homo sapiens GN=CAB39 PE=1 SV=1	29.6188	39.8	1.78748e+08	1.44582e+08	1.57767e+08	1.18408e+08	1.14928e+08	1.03376e+08	1.52979e+08	8.66877e+07	1.52741e+08
Q9H9S4	CAB39L	Calcium-binding protein 39-like OS=Homo sapiens GN=CAB39L PE=1 SV=3	7.71513	39.1	188704725	143145395				173678340	171670403	9.50574e+07
Q9Y6J0	CABIN1	Calcineurin-binding protein cabin-1 OS=Homo sapiens GN=CABIN1 PE=1 SV=1	0.855856	246.2
O00555	CACNA1A	Voltage-dependent P/Q-type calcium channel subunit alpha-1A OS=Homo sapiens GN=CACNA1A PE=1 SV=2	1.11776	282.2					3.23907e+06
Q15878	CACNA1E	Voltage-dependent R-type calcium channel subunit alpha-1E OS=Homo sapiens GN=CACNA1E PE=1 SV=3	1.08085	261.6								24808820
Q9BXT2	CACNG6	Voltage-dependent calcium channel gamma-6 subunit OS=Homo sapiens GN=CACNG6 PE=2 SV=1	2.69231	28.1	427889982	4.48008e+08	182828998	7.60558e+08	7.03181e+08	7.27926e+08	789809018	4.56707e+08	8.58378e+08
Q8WUQ7	CACTIN	Uncharacterized protein C19orf29 OS=Homo sapiens GN=C19orf29 PE=1 SV=2	21.1594	80.2	5.13851e+07	5.08254e+07	3.14102e+07	2.96144e+07	3.59514e+07	4.29432e+07	3.58586e+07	3.42349e+07	4.65216e+07
Q86Y37	CACUL1	Uncharacterized protein C10orf46 OS=Homo sapiens GN=C10orf46 PE=2 SV=1	8.40108	41			3.47796e+07			34387065
Q9HB71	CACYBP	Calcyclin-binding protein OS=Homo sapiens GN=CACYBP PE=1 SV=2	58.7719	26.2	9.33302e+08	8.24647e+08	9.33817e+08	960612496	847567175	1.06957e+09	8.20202e+08	5.39081e+08	2.27496e+09
P27708	CAD	CAD protein OS=Homo sapiens GN=CAD PE=1 SV=3	51.6404	242.8	5.9683e+08	3.04509e+08	3.39176e+08	3.15985e+08	2.54578e+08	2.95234e+08	3.32511e+08	2.16775e+08	3.33221e+08
Q9BY67	CADM1	Cell adhesion molecule 1 OS=Homo sapiens GN=CADM1 PE=1 SV=2	35.7466	48.5	4.43987e+08	3.78565e+08	3.9401e+08	3.30975e+08	3.48272e+08	3.44616e+08	3.29902e+08	3.0903e+08	3.12545e+08
Q8NFZ8	CADM4	Cell adhesion molecule 4 OS=Homo sapiens GN=CADM4 PE=1 SV=1	15.2062	42.8	2.95703e+07				3.47946e+07		18510004	1.5641e+07	3.19962e+07
Q13137	CALCOCO2	Calcium-binding and coiled-coil domain-containing protein 2 OS=Homo sapiens GN=CALCOCO2 PE=1 SV=1	13.4529	52.2	35178676		3.53778e+07	5.34481e+07	3.16683e+08	351327772	7.47244e+07	3.44088e+07	4.26315e+07
Q05682	CALD1	Caldesmon OS=Homo sapiens GN=CALD1 PE=1 SV=2	25.4729	93.2	3.78476e+08	4.18093e+08	4.09655e+08	2.59457e+08	2.61641e+08	2.74758e+08	3.77698e+08	2.57172e+08	3.69449e+08
Q86XJ0	CALHM3	Calcium homeostasis modulator protein 3 OS=Homo sapiens GN=CALHM3 PE=2 SV=1	5.14286	39.1
P62158	CALM1	Calmodulin OS=Homo sapiens GN=CALM1 PE=1 SV=2	57.7181	16.8	8.34075e+09	8.13561e+09	8.57704e+09	8.23409e+09	8.11063e+09	8.53364e+09	9.19045e+09	6.28509e+09	8.94336e+09
P27482	CALML3	Calmodulin-like protein 3 OS=Homo sapiens GN=CALML3 PE=1 SV=2	18.7919	16.9				1.58617e+08
Q9NZT1	CALML5	Calmodulin-like protein 5 OS=Homo sapiens GN=CALML5 PE=1 SV=2	23.9726	15.9
P27797	CALR	Calreticulin OS=Homo sapiens GN=CALR PE=1 SV=1	80.5755	48.1	1.44969e+10	1.50944e+10	1.53931e+10	1.6302e+10	1.51085e+10	1.59205e+10	1.48895e+10	1.12416e+10	1.46545e+10
O43852	CALU	Calumenin OS=Homo sapiens GN=CALU PE=1 SV=2	72.381	37.1	2.7162e+09	2518516247	2.65335e+09	2.66507e+09	2.45046e+09	2.55088e+09	2.30761e+09	1.44993e+09	2.45571e+09
Q14012	CAMK1	Calcium/calmodulin-dependent protein kinase type 1 OS=Homo sapiens GN=CAMK1 PE=1 SV=1	20.5405	41.3	4.1131e+07	1.26452e+07	3.00888e+07	41639859	2.67201e+07	50758058	5.42641e+07	2.40156e+07	5.61465e+07
Q13557	CAMK2D	Calcium/calmodulin-dependent protein kinase type II subunit delta OS=Homo sapiens GN=CAMK2D PE=1 SV=3	30.8617	56.3	1.95846e+08	2.50153e+08	2.23594e+08	199455336	2.17023e+08	2.12806e+08	2.3035e+08	1.13984e+08	1.72885e+08
Q13555	CAMK2G	Calcium/calmodulin-dependent protein kinase type II subunit gamma OS=Homo sapiens GN=CAMK2G PE=1 SV=3	30.4659	62.6	7.05734e+07	7.3395e+07	1.01952e+08	2.23567e+08	61439903	4.66908e+07	6.57187e+07	5.79971e+07	7.85083e+07
P49069	CAMLG	Calcium signal-modulating cyclophilin ligand OS=Homo sapiens GN=CAMLG PE=1 SV=1	23.3108	32.9	2.7702e+07	2.78072e+07	5.22576e+07	3.21649e+07	2.93729e+07	3.266e+07	2.66411e+07	2.57878e+07	33418086
Q9P1Y5	CAMSAP3	Calmodulin-regulated spectrin-associated protein 3 OS=Homo sapiens GN=KIAA1543 PE=1 SV=2	10.2482	134.7	2.10715e+07	4.08783e+07	3.24666e+07	4.83208e+07	3.76183e+07	4.43873e+07	1.49747e+07	2.20795e+07	4.44919e+07
Q86VP6	CAND1	Cullin-associated NEDD8-dissociated protein 1 OS=Homo sapiens GN=CAND1 PE=1 SV=2	39.1057	136.3	6.33796e+08	6.40958e+08	6.78641e+08	6.70848e+08	6.19168e+08	6.28246e+08	7.32727e+08	4.67576e+08	6.63872e+08
Q8WVQ1	CANT1	Soluble calcium-activated nucleotidase 1 OS=Homo sapiens GN=CANT1 PE=1 SV=1	35.9102	44.8	7.40793e+07	1.1706e+08	7.6887e+07	1.03436e+08	84017436	5.2811e+07	110522072	54724285	7.41697e+07
P27824	CANX	Calnexin OS=Homo sapiens GN=CANX PE=1 SV=2	58.7838	67.5	1.7332e+10	1.6764e+10	1.82664e+10	1.56943e+10	1.69724e+10	1.77985e+10	15450953791	1.06317e+10	1.68995e+10
Q01518	CAP1	Adenylyl cyclase-associated protein 1 OS=Homo sapiens GN=CAP1 PE=1 SV=4	49.2632	51.8	1.63071e+09	1.58532e+09	1.96258e+09	2.45466e+09	2.04575e+09	2.39276e+09	1.71195e+09	1.22147e+09	2.08039e+09
P40123	CAP2	Adenylyl cyclase-associated protein 2 OS=Homo sapiens GN=CAP2 PE=1 SV=1	35.2201	52.8	1.62195e+08	1.57538e+08	1.49848e+08	2.13207e+08	2.04297e+08	209761234	2.06434e+08	1.49714e+08	1.80782e+08
P40121	CAPG	Macrophage-capping protein OS=Homo sapiens GN=CAPG PE=1 SV=1	30.4598	38.5	7.1882e+07	1.08631e+08	8.79719e+07	1.05704e+08	1.12446e+08	1.07228e+08	7.29323e+07	6.25053e+07	7.98794e+07
P07384	CAPN1	Calpain-1 catalytic subunit OS=Homo sapiens GN=CAPN1 PE=1 SV=1	59.5238	81.8	6.75017e+08	6.69028e+08	780049634	7.72472e+08	7.21787e+08	7.47816e+08	594993328	3.51516e+08	6.8772e+08
P17655	CAPN2	Calpain-2 catalytic subunit OS=Homo sapiens GN=CAPN2 PE=1 SV=5	17.4286	80	3.70844e+07			37313235	2.36204e+07	3.90704e+07	4.05696e+07	2.26091e+07	3.98135e+07
Q9Y6W3	CAPN7	Calpain-7 OS=Homo sapiens GN=CAPN7 PE=1 SV=1	23.1242	92.6	4.93498e+07	4.89563e+07	4.57285e+07	34766210	3.6483e+07	4.95805e+07	5.57196e+07	3.64836e+07	5.90269e+07
P04632	CAPNS1	Calpain small subunit 1 OS=Homo sapiens GN=CAPNS1 PE=1 SV=1	70.5224	28.3	5.3622e+08	6.52866e+08	5.01348e+08	5.38616e+08	5.65507e+08	7.49273e+08	388210143	3.13062e+08	5.92262e+08
Q14444	CAPRIN1	Caprin-1 OS=Homo sapiens GN=CAPRIN1 PE=1 SV=2	29.7602	78.3	9.59347e+08	9.54374e+08	1068834482	9.80099e+08	8.86257e+08	9.31313e+08	1.00989e+09	6.20071e+08	1.01761e+09
P52907	CAPZA1	F-actin-capping protein subunit alpha-1 OS=Homo sapiens GN=CAPZA1 PE=1 SV=3	61.8881	32.9	1.09389e+09	1.01549e+09	1.15539e+09	9.17869e+08	9.79326e+08	1.01702e+09	1.09527e+09	7.79808e+08	1.0036e+09
P47755	CAPZA2	F-actin-capping protein subunit alpha-2 OS=Homo sapiens GN=CAPZA2 PE=1 SV=3	60.1399	32.9	4.60544e+08	4.55773e+08	5.18752e+08	5.11271e+08	3.98628e+08	5.50952e+08	495203800	3.6644e+08	4.64726e+08
P47756	CAPZB	F-actin-capping protein subunit beta OS=Homo sapiens GN=CAPZB PE=1 SV=4	51.9856	31.3	9.49243e+08	9.1884e+08	8.61227e+08	8.41066e+08	8.85573e+08	8.10222e+08	9.4258e+08	753450476	1.15138e+09
Q96LW7	CARD19	Bcl10-interacting CARD protein OS=Homo sapiens GN=C9orf89 PE=1 SV=1	8.77193	25.6								2.37303e+07
Q9H257	CARD9	Caspase recruitment domain-containing protein 9 OS=Homo sapiens GN=CARD9 PE=1 SV=2	9.88806	62.2		2.89714e+06					14790699
Q9Y2V2	CARHSP1	Calcium-regulated heat stable protein 1 OS=Homo sapiens GN=CARHSP1 PE=1 SV=2	64.6259	15.9	984318500	9.74254e+08	1.14736e+09	8.38673e+08	7.91795e+08	1.11943e+09	1.16574e+09	5.82825e+08	1.33402e+09
Q86X55	CARM1	Histone-arginine methyltransferase CARM1 OS=Homo sapiens GN=CARM1 PE=1 SV=2	23.5897	63.4	1.88667e+08	1.55074e+08	2.1662e+08	1.85057e+08	2.02412e+08	2.539e+08	2.36595e+08	9.8755e+07	3.08425e+08
Q5VZK9	CARMIL1	Leucine-rich repeat-containing protein 16A OS=Homo sapiens GN=LRRC16A PE=1 SV=1	14.8796	151.5	6.78521e+07	7.64572e+07	6.38201e+07	4.81299e+07	1.40602e+08	8.68624e+07	7.72412e+07	1.05922e+08	3.048e+07
Q8ND23	CARMIL3	Leucine-rich repeat-containing protein 16B OS=Homo sapiens GN=LRRC16B PE=2 SV=2	0.655977	150.1		4.88519e+07						36903033
Q8N4J0	CARNMT1	UPF0586 protein C9orf41 OS=Homo sapiens GN=C9orf41 PE=1 SV=1	8.06846	47.2	14841898	1.94682e+07	2.1851e+07			2.01254e+07	1.76153e+07		2.372e+07
P49589	CARS1	Cysteinyl-tRNA synthetase, cytoplasmic OS=Homo sapiens GN=CARS PE=1 SV=3	28.2086	85.4	65494772	8.85051e+07	9.32691e+07	1.25959e+08	1.20375e+08	1.27075e+08	7.63399e+07	3.43964e+07	8.74454e+07
Q9HA77	CARS2	Probable cysteinyl-tRNA synthetase, mitochondrial OS=Homo sapiens GN=CARS2 PE=1 SV=1	21.4539	62.2	1.61682e+08	1.66551e+08	1.30633e+08	1.92956e+08	1.76624e+08	1.89391e+08	1.69777e+08	8.15496e+07	1.83358e+08
O15234	CASC3	Protein CASC3 OS=Homo sapiens GN=CASC3 PE=1 SV=2	1.70697	76.2		1.5851e+08	9.85112e+06
O14936	CASK	Peripheral plasma membrane protein CASK OS=Homo sapiens GN=CASK PE=1 SV=3	31.8575	105.1	1.50602e+08	1.42538e+08	1.79953e+08	1.20139e+08	8.64582e+07	1.45169e+08	1.56803e+08	8.73478e+07	1.79528e+08
Q8WXE0	CASKIN2	Caskin-2 OS=Homo sapiens GN=CASKIN2 PE=1 SV=1	3.74376	126.6		1.08689e+06
Q92851	CASP10	Caspase-10 OS=Homo sapiens GN=CASP10 PE=1 SV=3	17.0825	58.9	1.75312e+07	9.54251e+06					3.50977e+07	1.49932e+07	13176940
P42575	CASP2	Caspase-2 OS=Homo sapiens GN=CASP2 PE=1 SV=2	3.09735	50.7	5.45486e+06	5.67622e+06	5.95799e+06	1.69027e+06			4.65231e+06		5362075
P42574	CASP3	Caspase-3 OS=Homo sapiens GN=CASP3 PE=1 SV=2	53.0686	31.6	1.02923e+08	1.58105e+08	1.73935e+08	9.07818e+07	1.07816e+08	1.08462e+08	1.07157e+08	1.14814e+08	126433968
P55212	CASP6	Caspase-6 OS=Homo sapiens GN=CASP6 PE=1 SV=2	12.628	33.3	2.23845e+07	3.51379e+07	4.17729e+07		105613576	99677213		1.36533e+07	4.1192e+07
P55210	CASP7	Caspase-7 OS=Homo sapiens GN=CASP7 PE=1 SV=1	18.1518	34.3	33656138	4.15116e+07	5.74407e+07	4.09406e+07	5.08688e+07	3.85697e+07	1.38584e+07	2.11494e+07	3.62989e+07
Q14790	CASP8	Caspase-8 OS=Homo sapiens GN=CASP8 PE=1 SV=1	31.9415	55.4	7.74445e+07	6.92101e+07	8.4152e+07	8.60522e+07	1.0551e+08	9.73067e+07	8.9146e+07	5.07299e+07	87168077
P20810	CAST	Calpastatin OS=Homo sapiens GN=CAST PE=1 SV=4	44.0678	76.5	2.00718e+08	2.05621e+08	2.26445e+08	2.50167e+08	2.0912e+08	2.25061e+08	2.1656e+08	1.36216e+08	2.18344e+08
A6NHX0	CASTOR2	GATS-like protein 2 OS=Homo sapiens GN=GATSL2 PE=2 SV=3	4.86322	36	6.79809e+06
P04040	CAT	Catalase OS=Homo sapiens GN=CAT PE=1 SV=3	71.3472	59.7	3.51974e+09	3.55968e+09	3.90656e+09	3.50032e+09	3.27405e+09	3522510125	2.99925e+09	1.8669e+09	3.35873e+09
Q6NZI2	CAVIN1	Polymerase I and transcript release factor OS=Homo sapiens GN=PTRF PE=1 SV=1	8.97436	43.5	25876972	2.65302e+07	3.28444e+07	5.90071e+07	3.62647e+07	3.24336e+07	14799382		5.27738e+07
O95810	CAVIN2	Serum deprivation-response protein OS=Homo sapiens GN=SDPR PE=1 SV=3	23.7647	47.1	1.12862e+08	1.15513e+08	1.21435e+08	1.58466e+08	1.75368e+08	1.9802e+08	9.20414e+07	6.37547e+07	1.2629e+08
Q13951	CBFB	Core-binding factor subunit beta OS=Homo sapiens GN=CBFB PE=1 SV=2	8.79121	21.5	5.34442e+07	39293846		7.21661e+07	7.65188e+07	8.29e+07			8.22648e+07
P22681	CBL	E3 ubiquitin-protein ligase CBL OS=Homo sapiens GN=CBL PE=1 SV=2	6.84327	99.6	30269575		21031728	24948297	2.77025e+07	20637617	2.62186e+07	1.64575e+07	13149974
P16152	CBR1	Carbonyl reductase [NADPH] 1 OS=Homo sapiens GN=CBR1 PE=1 SV=3	71.8412	30.4	5.27564e+08	4.83503e+08	592331382	5.68117e+08	5.40983e+08	5.57366e+08	5.63097e+08	4.29355e+08	554834487
Q8N4T8	CBR4	Carbonyl reductase family member 4 OS=Homo sapiens GN=CBR4 PE=1 SV=3	36.2869	25.3	1.84673e+08	1.99258e+08	229421275	1.64184e+08	1.7575e+08	1.89363e+08	1.66157e+08	1.09633e+08
P35520	CBS	Cystathionine beta-synthase OS=Homo sapiens GN=CBS PE=1 SV=2	27.2232	60.5	7.45414e+07	6.76157e+07	1.28174e+08	8.62682e+07	9.21147e+07	1.07024e+08	1.21698e+08	6.53109e+07	9.06627e+07
Q5JTY5	CBWD3	COBW domain-containing protein 3 OS=Homo sapiens GN=CBWD3 PE=3 SV=1	33.6709	44	4.53436e+07	3.76404e+07	3.32995e+07	3.89113e+07		32591715	4.7779e+07	29228443	3.69775e+07
P83916	CBX1	Chromobox protein homolog 1 OS=Homo sapiens GN=CBX1 PE=1 SV=1	46.4865	21.4	1.89606e+08	2.02958e+08	1.85891e+08	2.8767e+08	1.86823e+08	2.79985e+08	2.6731e+08	2.04289e+08	2.03549e+08
Q14781	CBX2	Chromobox protein homolog 2 OS=Homo sapiens GN=CBX2 PE=1 SV=2	3.7594	56
Q13185	CBX3	Chromobox protein homolog 3 OS=Homo sapiens GN=CBX3 PE=1 SV=4	58.4699	20.8	1.1973e+09	1.37044e+09	1488747274	1.18396e+09	1.28156e+09	1.2317e+09	1.35986e+09	1.02427e+09	1.48266e+09
O00257	CBX4	E3 SUMO-protein ligase CBX4 OS=Homo sapiens GN=CBX4 PE=1 SV=3	17.1429	61.3	7.65044e+07	6.93729e+07	8.06072e+07		86159503	3.44451e+06	1.00033e+08	5.26673e+07
P45973	CBX5	Chromobox protein homolog 5 OS=Homo sapiens GN=CBX5 PE=1 SV=1	51.8325	22.2	1.2831e+08	3.22351e+08	1.721e+08		1.65466e+08	2.18693e+08	2.16304e+08	1.64019e+08	1.22033e+08
Q9HC52	CBX8	Chromobox protein homolog 8 OS=Homo sapiens GN=CBX8 PE=1 SV=3	29.8201	43.4	8.84767e+07	7.31544e+07	8.70988e+07	7.07558e+07	75698700	8.87461e+07	1.09218e+08	4.22622e+07	9.22017e+07
Q6P1N0	CC2D1A	Coiled-coil and C2 domain-containing protein 1A OS=Homo sapiens GN=CC2D1A PE=1 SV=1	9.98948	104	2.17587e+07	2.4106e+07	2.46593e+07	2.14681e+07			2.26593e+07	2.10421e+07	3.79526e+07
Q5T0F9	CC2D1B	Coiled-coil and C2 domain-containing protein 1B OS=Homo sapiens GN=CC2D1B PE=1 SV=1	12.3543	94.2	1.85448e+07	2.53195e+07	2.7659e+07	6.75894e+07	99487231		3.40114e+07	1.89301e+07	9.87038e+07
Q8IX12	CCAR1	Cell division cycle and apoptosis regulator protein 1 OS=Homo sapiens GN=CCAR1 PE=1 SV=2	34.9565	132.7	5.06422e+08	5.01146e+08	5.97743e+08	4.72906e+08	4.85653e+08	5.88257e+08	4.82361e+08	3.02107e+08	5.90066e+08
Q8N163	CCAR2	Protein KIAA1967 OS=Homo sapiens GN=KIAA1967 PE=1 SV=2	41.6035	102.8	6.31795e+08	6.07936e+08	6.54766e+08	5.09019e+08	5.37552e+08	5.77268e+08	6.97686e+08	4.64616e+08	6.47793e+08
Q9BWC9	CCDC106	Coiled-coil domain-containing protein 106 OS=Homo sapiens GN=CCDC106 PE=2 SV=1	16.7857	32		1.91198e+07	2.69972e+07				1.61367e+07
Q96NT0	CCDC115	Coiled-coil domain-containing protein 115 OS=Homo sapiens GN=CCDC115 PE=1 SV=1	30.5556	19.7	78735422	86610940	14943484	9.56668e+07	9.0905e+07	6.36319e+07	1.19338e+08		9.3832e+07
Q8WUD4	CCDC12	Coiled-coil domain-containing protein 12 OS=Homo sapiens GN=CCDC12 PE=1 SV=1	40.9639	19.2	1.53676e+08	6.02868e+07	1.32706e+08	1.81138e+08	1.70896e+08	1.42531e+08	1.82119e+08	9.94776e+07	1.75205e+08
Q96CT7	CCDC124	Coiled-coil domain-containing protein 124 OS=Homo sapiens GN=CCDC124 PE=1 SV=1	25.1121	25.8	1.7107e+08	1.96644e+08	5.75436e+07	2.06582e+08	2.39321e+08	1.90167e+08	8.40439e+07	1.18144e+08	2.00928e+08
Q96EE4	CCDC126	Coiled-coil domain-containing protein 126 OS=Homo sapiens GN=CCDC126 PE=2 SV=2	8.57143	15.7		28428425	27391386	3.73528e+07		28278555
Q96BQ5	CCDC127	Coiled-coil domain-containing protein 127 OS=Homo sapiens GN=CCDC127 PE=1 SV=1	3.46154	30.8
Q9H6E4	CCDC134	Coiled-coil domain-containing protein 134 OS=Homo sapiens GN=CCDC134 PE=1 SV=1	30.5677	26.5	63384914	1.7111e+08	1.59906e+08	1.3215e+08	1.32067e+08	1.28179e+08	1.16389e+08	1.09006e+08	1.4587e+08
Q6PK04	CCDC137	Coiled-coil domain-containing protein 137 OS=Homo sapiens GN=CCDC137 PE=1 SV=1	11.7647	33.2	3.27571e+07		87306705			61482168	2.96111e+07	6.83678e+07	7.50599e+07
Q96M89	CCDC138	Coiled-coil domain-containing protein 138 OS=Homo sapiens GN=CCDC138 PE=1 SV=1	3.7594	76.2								2.77048e+06
A6NI56	CCDC154	Coiled-coil domain-containing protein 154 OS=Homo sapiens GN=CCDC154 PE=2 SV=4	1.03858	76								2.74394e+08
Q5M9N0	CCDC158	Coiled-coil domain-containing protein 158 OS=Homo sapiens GN=CCDC158 PE=2 SV=2	0.808625	127.1	161354834	1.41995e+08	155963279	1.36127e+08		123275816			1.69304e+08
Q9P0B6	CCDC167	Transmembrane and coiled-coil domain-containing protein C6orf129 OS=Homo sapiens GN=C6orf129 PE=2 SV=2	15.4639	11.5
Q6TFL3	CCDC171	Uncharacterized protein C9orf93 OS=Homo sapiens GN=C9orf93 PE=2 SV=1	1.35747	152.7			20849617
P0C221	CCDC175	Uncharacterized protein C14orf38 OS=Homo sapiens GN=C14orf38 PE=2 SV=1	1.08696	97.4
Q7Z3E2	CCDC186	Uncharacterized protein C10orf118 OS=Homo sapiens GN=C10orf118 PE=2 SV=2	4.5657	103.6	8.09807e+06	1.0003e+07	1.31294e+07
O60826	CCDC22	Coiled-coil domain-containing protein 22 OS=Homo sapiens GN=CCDC22 PE=1 SV=1	24.8804	70.7	2.54824e+07	3.4397e+07	3.45708e+07	5.01446e+07	2.45855e+07	2.23587e+07	3.42256e+07	2.34383e+07	4.439e+07
Q86WR0	CCDC25	Coiled-coil domain-containing protein 25 OS=Homo sapiens GN=CCDC25 PE=1 SV=2	15.3846	24.5	1.06174e+08	9.33271e+07	1.16135e+08	7.68155e+08	90004393	8.81149e+07	106482149	6.34051e+07	130372565
Q5VVM6	CCDC30	Coiled-coil domain-containing protein 30 OS=Homo sapiens GN=CCDC30 PE=2 SV=1	1.02171	91.3
Q96MW1	CCDC43	Coiled-coil domain-containing protein 43 OS=Homo sapiens GN=CCDC43 PE=1 SV=1	37.9464	25.3	59564328	8.18855e+07	72432446	9.50188e+07	5.16501e+07	69742212	6.08564e+07	4.70723e+07
Q96A33	CCDC47	Coiled-coil domain-containing protein 47 OS=Homo sapiens GN=CCDC47 PE=1 SV=1	45.3416	55.8	7.74358e+08	1002348418	1.09197e+09	1.29261e+09	1.12298e+09	1.27123e+09	1.2181e+09	6.05356e+08	1.15225e+09
Q8IVM0	CCDC50	Coiled-coil domain-containing protein 50 OS=Homo sapiens GN=CCDC50 PE=1 SV=1	8.49673	35.8		1.51276e+07	2.67279e+07	9.50174e+06		9766351
Q96ER9	CCDC51	Coiled-coil domain-containing protein 51 OS=Homo sapiens GN=CCDC51 PE=1 SV=2	35.7664	45.8	3.11483e+08	3.50573e+08	4.02574e+08	2.93584e+08	2.57358e+08	2.82553e+08	2.6072e+08	1.74435e+08	2.43581e+08
Q9P031	CCDC59	Thyroid transcription factor 1-associated protein 26 OS=Homo sapiens GN=CCDC59 PE=1 SV=2	10.7884	28.7				90770128	87869996		41996230	7.57346e+07	21354906
Q16204	CCDC6	Coiled-coil domain-containing protein 6 OS=Homo sapiens GN=CCDC6 PE=1 SV=1	20.8547	65.9	9.15464e+07	9.43703e+07	6.7048e+07	6.84685e+07	7.16071e+07	9.59029e+07	1.0341e+08	6.50867e+07	1.25099e+08
Q6NSX1	CCDC70	Coiled-coil domain-containing protein 70 OS=Homo sapiens GN=CCDC70 PE=2 SV=1	6.00858	28.7							130398924
Q6ZRK6	CCDC73	Coiled-coil domain-containing protein 73 OS=Homo sapiens GN=CCDC73 PE=1 SV=2	1.66821	124.1						1.02684e+07
Q9BR77	CCDC77	Coiled-coil domain-containing protein 77 OS=Homo sapiens GN=CCDC77 PE=2 SV=1	4.30328	57.5	8.54806e+06		1.23923e+07				1.05143e+07		8.93355e+06
Q9H0W5	CCDC8	Coiled-coil domain-containing protein 8 OS=Homo sapiens GN=CCDC8 PE=1 SV=2	2.97398	59.3								7.2409e+06
Q8N4S0	CCDC82	Coiled-coil domain-containing protein 82 OS=Homo sapiens GN=CCDC82 PE=1 SV=2	3.67647	64	2.2744e+07	2.11319e+07	28672287	1.15935e+07	1.44028e+07	2.33134e+07	9.69793e+06	6.61141e+06	2.40415e+07
A6NKD9	CCDC85C	Coiled-coil domain-containing protein 85C OS=Homo sapiens GN=CCDC85C PE=1 SV=1	11.2172	45.2							1.36372e+07	2.34761e+07	1.89486e+07
Q9H6F5	CCDC86	Coiled-coil domain-containing protein 86 OS=Homo sapiens GN=CCDC86 PE=1 SV=1	48.3333	40.2	2.99051e+08	3.34235e+08	2.93257e+08	1.66452e+08	1.64804e+08	140878911	1.71429e+08	1.85704e+08	2.37417e+08
Q3V6T2	CCDC88A	Girdin OS=Homo sapiens GN=CCDC88A PE=1 SV=2	2.08445	215.9	8.62775e+06
A6NC98	CCDC88B	Coiled-coil domain-containing protein 88B OS=Homo sapiens GN=CCDC88B PE=1 SV=1	0.542005	164.7	2.44065e+08	246422857			174879635		287037411		3.09506e+08
Q9P219	CCDC88C	Protein Daple OS=Homo sapiens GN=CCDC88C PE=1 SV=2	0.936884	228.1
Q9Y3X0	CCDC9	Coiled-coil domain-containing protein 9 OS=Homo sapiens GN=CCDC9 PE=1 SV=1	7.9096	59.7	5.78962e+07	5.14728e+07	28720812	9.36335e+07		5.76208e+07	9.98872e+07	3.14691e+07	6.99473e+07
Q9GZT6	CCDC90B	Coiled-coil domain-containing protein 90B, mitochondrial OS=Homo sapiens GN=CCDC90B PE=1 SV=1	44.0945	29.5	1.46285e+08	188663171	1.75617e+08	2.46758e+08	1.28677e+08	1.82935e+08	1.85093e+08	6.4874e+07	1.71427e+08
Q567U6	CCDC93	Coiled-coil domain-containing protein 93 OS=Homo sapiens GN=CCDC93 PE=1 SV=2	17.2742	73.2	4.44529e+07	34677684					9.90939e+07		47355772
Q96F63	CCDC97	Coiled-coil domain-containing protein 97 OS=Homo sapiens GN=CCDC97 PE=1 SV=1	35.8601	38.9	4.27026e+07	50411434	25021225	3.15825e+07		5.74224e+06	4.65444e+07	1.73351e+07	2.74042e+07
P78556	CCL20	C-C motif chemokine 20 OS=Homo sapiens GN=CCL20 PE=1 SV=1	17.7083	10.8
O00622	CCN1	Protein CYR61 OS=Homo sapiens GN=CYR61 PE=1 SV=1	3.41207	42
P29279	CCN2	Connective tissue growth factor OS=Homo sapiens GN=CTGF PE=1 SV=2	14.6132	38.1
P20248	CCNA2	Cyclin-A2 OS=Homo sapiens GN=CCNA2 PE=1 SV=1	25.2315	48.5	79104007	8.63143e+07	7.53237e+07	41201448	4.20552e+07	4.61524e+07	8.56169e+07	4.56522e+07	6.89479e+07
P14635	CCNB1	G2/mitotic-specific cyclin-B1 OS=Homo sapiens GN=CCNB1 PE=1 SV=1	24.7113	48.3	1.91294e+08	178486254	2.23744e+08	1.48548e+08	133149291	1.74135e+08	1.67873e+08	1.08443e+08	1.63801e+08
O95067	CCNB2	G2/mitotic-specific cyclin-B2 OS=Homo sapiens GN=CCNB2 PE=1 SV=1	8.0402	45.3		2.58203e+07
P24863	CCNC	Cyclin-C OS=Homo sapiens GN=CCNC PE=1 SV=2	9.54064	33.2			31151382		1.21861e+07	9.52458e+06	1.20086e+07	1.01963e+07	2.48223e+07
P51946	CCNH	Cyclin-H OS=Homo sapiens GN=CCNH PE=1 SV=1	17.9567	37.6	7.25961e+07	6.74627e+07			4.7406e+07	6.39766e+07	7.99008e+07		7.88949e+07
O75909	CCNK	Cyclin-K OS=Homo sapiens GN=CCNK PE=1 SV=2	22.2414	64.2	1.62675e+08	1.21885e+08	2.00889e+08	1.08435e+08	1.01437e+08	2.30729e+08	1.57644e+08	1.03022e+08	1.38153e+08
Q9UK58	CCNL1	Cyclin-L1 OS=Homo sapiens GN=CCNL1 PE=1 SV=1	23.5741	59.6	3.67879e+07	28407877	2.89039e+08	64558644	6.53829e+07	8.79907e+07	5.97992e+07	52240747	88795619
Q96S94	CCNL2	Cyclin-L2 OS=Homo sapiens GN=CCNL2 PE=1 SV=1	6.73077	58.1
O60563	CCNT1	Cyclin-T1 OS=Homo sapiens GN=CCNT1 PE=1 SV=1	5.64738	80.6
O60583	CCNT2	Cyclin-T2 OS=Homo sapiens GN=CCNT2 PE=1 SV=2	2.32877	81	37178120	4.22409e+07	2.91438e+07
Q8ND76	CCNY	Cyclin-Y OS=Homo sapiens GN=CCNY PE=1 SV=2	34.0176	39.3	8.582e+07	7.32351e+07	8.22076e+07	3.27339e+08	3.15289e+08	3.38625e+08	78260825	5.04234e+07	1.26448e+08
Q8N7R7	CCNYL1	Cyclin-Y-like protein 1 OS=Homo sapiens GN=CCNYL1 PE=1 SV=2	14.7632	40.7	14910900		1.6335e+07
Q9ULG6	CCPG1	Cell cycle progression protein 1 OS=Homo sapiens GN=CCPG1 PE=1 SV=3	7.13342	87.3							197425171	3.6246e+06	205781184
O14618	CCS	Copper chaperone for superoxide dismutase OS=Homo sapiens GN=CCS PE=1 SV=1	35.0365	29	1.00892e+08	4.92882e+07	57692424	1.27984e+08	109163784	1.52185e+08	119049468	60354441	1.14775e+08
Q4G0I0	CCSMST1	Protein CCSMST1 OS=Homo sapiens GN=CCSMST1 PE=2 SV=1	33.3333	15	8.59982e+07	4.82081e+07	18053701	5.42224e+06	7.11613e+07	8.51055e+07	7.81683e+07		104491305
P78371	CCT2	T-complex protein 1 subunit beta OS=Homo sapiens GN=CCT2 PE=1 SV=4	75.1402	57.5	2.31119e+09	2.20465e+09	2.6019e+09	2.52422e+09	2.12244e+09	2.47688e+09	2.22345e+09	1.30983e+09	2.54547e+09
P49368	CCT3	T-complex protein 1 subunit gamma OS=Homo sapiens GN=CCT3 PE=1 SV=4	67.156	60.5	2.19562e+09	2.08942e+09	2.49006e+09	2.22818e+09	2.27184e+09	2.45568e+09	2.3135e+09	1.49173e+09	2.34619e+09
P50991	CCT4	T-complex protein 1 subunit delta OS=Homo sapiens GN=CCT4 PE=1 SV=4	71.6141	57.9	2.00128e+09	1.93066e+09	2.24086e+09	2.2331e+09	2.112e+09	2.32465e+09	2.09128e+09	1.1893e+09	2.29488e+09
P48643	CCT5	T-complex protein 1 subunit epsilon OS=Homo sapiens GN=CCT5 PE=1 SV=1	70.0555	59.6	1.48764e+09	1.52343e+09	2022248093	1.78398e+09	1.61005e+09	1.76106e+09	1.6367e+09	8.49253e+08	2.01748e+09
P40227	CCT6A	T-complex protein 1 subunit zeta OS=Homo sapiens GN=CCT6A PE=1 SV=3	66.1017	58	1.72049e+09	1.77921e+09	2.11572e+09	1.57259e+09	1.555e+09	1.70969e+09	1.58478e+09	1.19111e+09	1.64435e+09
Q99832	CCT7	T-complex protein 1 subunit eta OS=Homo sapiens GN=CCT7 PE=1 SV=2	72.9282	59.3	1669915936	1.35904e+09	1.50001e+09	1.27142e+09	2.07406e+09	1.41113e+09	1.89e+09	9.37856e+08	1.4251e+09
P50990	CCT8	T-complex protein 1 subunit theta OS=Homo sapiens GN=CCT8 PE=1 SV=4	69.3431	59.6	2.00286e+09	1.92194e+09	2.17535e+09	2.07747e+09	1995941674	2.08792e+09	2064148587	1.30959e+09	2.22644e+09
O95766	CCZ1	UPF0550 protein C7orf28 OS=Homo sapiens GN=C7orf28A PE=1 SV=1	12.0332	55.8	2.41824e+07	41132436	54904216		75145494	5.7238e+07	4.51818e+07	42164472	5.96052e+07
Q6YHK3	CD109	CD109 antigen OS=Homo sapiens GN=CD109 PE=1 SV=2	5.25952	161.6	2.21981e+07	1.4651e+07	2.45429e+07	3.59623e+07	9.5854e+06	31600140	30136266	20821360	30648746
P48509	CD151	CD151 antigen OS=Homo sapiens GN=CD151 PE=1 SV=3	3.95257	28.3				3.27165e+08		283694185			2.62649e+08
Q5ZPR3	CD276	CD276 antigen OS=Homo sapiens GN=CD276 PE=1 SV=1	25.4682	57.2	9.46318e+07	9.70492e+07	7.99704e+07	1.25486e+08	1.02697e+08	5.35814e+07	7.63147e+07	2.10659e+07	9.95509e+07
Q9Y5K6	CD2AP	CD2-associated protein OS=Homo sapiens GN=CD2AP PE=1 SV=1	43.349	71.4	2.10649e+08	1.92024e+08	1.91279e+08	1.99242e+08	1.94759e+08	2.12349e+08	1.93507e+08	1.27052e+08	1.91796e+08
O95400	CD2BP2	CD2 antigen cytoplasmic tail-binding protein 2 OS=Homo sapiens GN=CD2BP2 PE=1 SV=1	37.8299	37.6	2.86609e+08	3.60792e+08	4.10102e+08	3.22113e+08	2.26897e+08	262152520	262551386	2.80149e+08	3.99023e+08
Q8IX05	CD302	CD302 antigen OS=Homo sapiens GN=CD302 PE=1 SV=1	6.03448	26.2
Q9NPF0	CD320	CD320 antigen OS=Homo sapiens GN=CD320 PE=1 SV=1	19.8582	29	3.7058e+07	3.15389e+06			3.46596e+07	3.67761e+06	91744484		79613555
P25942	CD40	Tumor necrosis factor receptor superfamily member 5 OS=Homo sapiens GN=CD40 PE=1 SV=1	13.7184	30.6					42714704
P15529	CD46	Membrane cofactor protein OS=Homo sapiens GN=CD46 PE=1 SV=3	12.5	43.7	2.44101e+08	2.14612e+08	4.38346e+08	295176820	4.25512e+08	4.49911e+08	2.08151e+08	141872903	4.46641e+08
Q08722	CD47	Leukocyte surface antigen CD47 OS=Homo sapiens GN=CD47 PE=1 SV=1	3.40557	35.2
P08174	CD55	Complement decay-accelerating factor OS=Homo sapiens GN=CD55 PE=1 SV=4	12.5984	41.4					12513036
P19256	CD58	Lymphocyte function-associated antigen 3 OS=Homo sapiens GN=CD58 PE=1 SV=1	10.8	28.1							29962035
P13987	CD59	CD59 glycoprotein OS=Homo sapiens GN=CD59 PE=1 SV=1	18.75	14.2	7.84937e+08	6.4996e+08	8.69148e+08	4.23758e+08	419130615	4.4451e+08	4.91945e+08	3.40336e+08	566890208
P08962	CD63	CD63 antigen OS=Homo sapiens GN=CD63 PE=1 SV=2	7.56303	25.6	920907176	9.7898e+08	1085200810	4.84261e+08	9.25063e+08	8.65139e+08	56023162	3.3461e+08	659614012
P34810	CD68	Macrosialin OS=Homo sapiens GN=CD68 PE=1 SV=2	6.21469	37.4		27105680			41597158			43897620
P09564	CD7	T-cell antigen CD7 OS=Homo sapiens GN=CD7 PE=1 SV=1	15.8333	25.4	40272287	44912411	4.53386e+07	1.43767e+07	2.09815e+07	20359775	42600270	2.62577e+07
P04233	CD74	HLA class II histocompatibility antigen gamma chain OS=Homo sapiens GN=CD74 PE=1 SV=3	25.6757	33.5	6.65974e+08	6.55621e+08	7.12324e+08	5.0924e+08	5.37256e+08	5.79653e+08	654900683	4.93521e+08	4.05823e+08
P21926	CD9	CD9 antigen OS=Homo sapiens GN=CD9 PE=1 SV=4	15.3509	25.4		449378283	472206477		417718872	413147486			400125950
P40200	CD96	T-cell surface protein tactile OS=Homo sapiens GN=CD96 PE=1 SV=2	1.19658	65.6		249322620
P14209	CD99	CD99 antigen OS=Homo sapiens GN=CD99 PE=1 SV=1	12.973	18.8	8.24442e+06			4.33628e+08	2.88692e+08	3.73963e+08	86816645	1.44362e+08	6.78269e+07
P32320	CDA	Cytidine deaminase OS=Homo sapiens GN=CDA PE=1 SV=2	54.7945	16.2	1.14187e+07	2.56585e+07	2.7025e+07	3.67526e+07	3.98235e+07	3.92112e+07	3.82816e+07	3.44687e+07	4.33582e+07
Q8IWY9	CDAN1	Codanin-1 OS=Homo sapiens GN=CDAN1 PE=1 SV=3	2.85249	134.1	761551	1.04718e+06		2.30722e+06	5.50283e+06	10800080	2.2303e+06
O75794	CDC123	Cell division cycle protein 123 homolog OS=Homo sapiens GN=CDC123 PE=1 SV=1	33.0357	39.1	75056420	9.88402e+07	123831686	1.0362e+08	1.14066e+08	7.41261e+07	1.15487e+08	5.91811e+07	1.08131e+08
A4D256	CDC14C	Dual specificity protein phosphatase CDC14C OS=Homo sapiens GN=CDC14C PE=1 SV=2	3.97112	63.3					3.74746e+06
Q13042	CDC16	Cell division cycle protein 16 homolog OS=Homo sapiens GN=CDC16 PE=1 SV=2	18.7097	71.6	4.09487e+07	4.3448e+07		4.00065e+07	4.23759e+07	5.2832e+07	2.67593e+07	3.02711e+07	3.45907e+07
Q12834	CDC20	Cell division cycle protein 20 homolog OS=Homo sapiens GN=CDC20 PE=1 SV=2	35.6713	54.7	6.50398e+07	71840671	3.01608e+07	16071957	2.71473e+07	5.25746e+07	253267884	48238470	9.30714e+07
Q9UJX2	CDC23	Cell division cycle protein 23 homolog OS=Homo sapiens GN=CDC23 PE=1 SV=3	29.9832	68.8	8.7339e+07	4.24368e+07	4.63073e+07	3.057e+07	6.7815e+07	6.95176e+07	7.56392e+07	5.94778e+07	1.1576e+08
P30307	CDC25C	M-phase inducer phosphatase 3 OS=Homo sapiens GN=CDC25C PE=1 SV=2	2.95983	53.3									1.26681e+07
Q8NHZ8	CDC26	Anaphase-promoting complex subunit CDC26 OS=Homo sapiens GN=CDC26 PE=1 SV=1	12.9412	9.8		4.79817e+07	5.54831e+07
P30260	CDC27	Cell division cycle protein 27 homolog OS=Homo sapiens GN=CDC27 PE=1 SV=2	26.9417	91.8	1.06598e+08	9.37788e+07	1.00381e+08	9.45283e+07	8.62986e+07	9.69629e+07	5.55787e+07	6.48376e+07	9.48343e+07
P49427	CDC34	Ubiquitin-conjugating enzyme E2 R1 OS=Homo sapiens GN=CDC34 PE=1 SV=2	18.2203	26.7	1.2724e+07		9284071		8.20448e+06			3.19952e+06	16094444
Q16543	CDC37	Hsp90 co-chaperone Cdc37 OS=Homo sapiens GN=CDC37 PE=1 SV=1	40.2116	44.4	7.23838e+08	677609204	7.44782e+08	772506950	7.88233e+08	7.41904e+08	787831920	5.52723e+08	8.45954e+08
O60508	CDC40	Pre-mRNA-processing factor 17 OS=Homo sapiens GN=CDC40 PE=1 SV=1	24.1796	65.5	1.27268e+08	5.26772e+07	7.40328e+07	8.59841e+07	1.015e+08	8.62962e+07	5.2545e+07	3.24435e+07	1.01091e+08
P60953	CDC42	Cell division control protein 42 homolog OS=Homo sapiens GN=CDC42 PE=1 SV=1	28.2723	21.3	1.54504e+09	1.51629e+09	1.72803e+09	1.07483e+09	805770841	1.08638e+09	9.50111e+08	5.48815e+08	9.42721e+08
Q5VT25	CDC42BPA	Serine/threonine-protein kinase MRCK alpha OS=Homo sapiens GN=CDC42BPA PE=1 SV=1	1.61663	197.2
Q9Y5S2	CDC42BPB	Serine/threonine-protein kinase MRCK beta OS=Homo sapiens GN=CDC42BPB PE=1 SV=2	12.5073	194.2	2.48048e+07	2.85539e+07	2.07615e+07	8.59751e+07	5.05531e+07	5.83028e+07	3.94865e+07	1.02151e+07	2.25657e+07
Q6DT37	CDC42BPG	Serine/threonine-protein kinase MRCK gamma OS=Homo sapiens GN=CDC42BPG PE=1 SV=2	1.74081	172.4									9.34365e+06
Q00587	CDC42EP1	Cdc42 effector protein 1 OS=Homo sapiens GN=CDC42EP1 PE=1 SV=1	15.601	40.3	4.79909e+07	46339779						1.43811e+07
Q9H3Q1	CDC42EP4	Cdc42 effector protein 4 OS=Homo sapiens GN=CDC42EP4 PE=1 SV=1	15.1685	38	26439452	3.25588e+07	3.71283e+07						9758523
Q9NRR3	CDC42SE2	CDC42 small effector protein 2 OS=Homo sapiens GN=CDC42SE2 PE=1 SV=1	66.6667	9.2	49003223	9.18378e+07	103090154	1.01212e+08	109497222	1.10543e+08	7.29312e+07	9.30211e+07	1.01015e+08
O75419	CDC45	CDC45-related protein OS=Homo sapiens GN=CDC45L PE=1 SV=1	10.2473	65.5	2.23234e+07	2.28189e+07		1.9898e+07	2.17252e+07	1.53424e+07	1.87086e+07	2.08528e+07	5.37969e+07
Q99459	CDC5L	Cell division cycle 5-like protein OS=Homo sapiens GN=CDC5L PE=1 SV=2	57.8554	92.2	4.64541e+08	4.67989e+08	5.26355e+08	3.87456e+08	3.77629e+08	3.92791e+08	508352046	3.461e+08	4.43083e+08
Q6P1J9	CDC73	Parafibromin OS=Homo sapiens GN=CDC73 PE=1 SV=1	40.3013	60.5	1.91034e+08	1.63842e+08	2.02313e+08	2.01299e+08	1.89002e+08	1.97973e+08	1.82598e+08	9.85404e+07	1.57237e+08
Q99618	CDCA3	Cell division cycle-associated protein 3 OS=Homo sapiens GN=CDCA3 PE=1 SV=1	21.6418	29	1.79695e+07	1.17562e+07	1.28889e+07				7.75302e+06		158374727
Q96FF9	CDCA5	Sororin OS=Homo sapiens GN=CDCA5 PE=1 SV=1	9.12698	27.6	3.63665e+07	19976752
Q53HL2	CDCA8	Borealin OS=Homo sapiens GN=CDCA8 PE=1 SV=2	33.9286	31.3	9.4444e+07	7.31838e+07	140735372	115923408	46687384	79929614	1.02259e+08	6.41956e+07	1.18358e+08
P12830	CDH1	Cadherin-1 OS=Homo sapiens GN=CDH1 PE=1 SV=3	4.08163	97.4		5.51327e+07	81087856			46848938		61180674	7.12856e+07
Q9H159	CDH19	Cadherin-19 OS=Homo sapiens GN=CDH19 PE=2 SV=1	1.42487	86.9
P19022	CDH2	Cadherin-2 OS=Homo sapiens GN=CDH2 PE=1 SV=4	25.3863	99.7	4.35733e+08	4.23833e+08	4.67715e+08	4.7306e+08	4.50019e+08	4.75016e+08	395473374	2.86426e+08	4.66479e+08
Q86UP0	CDH24	Cadherin-24 OS=Homo sapiens GN=CDH24 PE=1 SV=1	1.4652	87.7	2158330123			5.99043e+07					8.02229e+07
Q9BYE9	CDHR2	Protocadherin-24 OS=Homo sapiens GN=PCDH24 PE=1 SV=2	0.992366	141.5	1.16174e+07			1.66745e+07	1.44321e+07	1.65718e+07
O14735	CDIPT	CDP-diacylglycerol--inositol 3-phosphatidyltransferase OS=Homo sapiens GN=CDIPT PE=1 SV=1	35.6808	23.5	2.98764e+08	2.8563e+08	3.45488e+08	2.95347e+08	2.70915e+08	3.08837e+08	2.61537e+08	2.00659e+08	2.93565e+08
P06493	CDK1	Cell division control protein 2 homolog OS=Homo sapiens GN=CDC2 PE=1 SV=2	63.6364	34.1	9.43527e+08	8.93446e+08	1.00275e+09	8.14358e+08	7.69797e+08	785023238	936854721	5.38382e+08	9.55676e+08
P21127	CDK11B	Cell division protein kinase 11B OS=Homo sapiens GN=CDK11B PE=1 SV=3	24.0252	92.7	1.9769e+08	2.33554e+08	201526802	1.8266e+08	1.77841e+08	2.12226e+08	223787639	1.3421e+08	2.10343e+08
Q9NYV4	CDK12	Cell division protein kinase 12 OS=Homo sapiens GN=CDK12 PE=1 SV=1	21.8121	164.1	1.55686e+08	1.49714e+08	1.33669e+08	9.08353e+07	7.90311e+07	6.60493e+07	4.53274e+07	8.12015e+07	1.09554e+08
Q14004	CDK13	Cell division protein kinase 13 OS=Homo sapiens GN=CDK13 PE=1 SV=2	5.88624	164.8	2.83248e+07				16179718
Q00536	CDK16	Cell division protein kinase 16 OS=Homo sapiens GN=CDK16 PE=1 SV=1	5.64516	55.7							1.54215e+07
Q07002	CDK18	Cell division protein kinase 18 OS=Homo sapiens GN=CDK18 PE=1 SV=3	9.74576	54.1							4.08339e+06
Q9BWU1	CDK19	Cell division protein kinase 19 OS=Homo sapiens GN=CDK19 PE=1 SV=1	3.18725	56.8	12269850	1.0433e+07	14447422
P24941	CDK2	Cell division protein kinase 2 OS=Homo sapiens GN=CDK2 PE=1 SV=2	45.9732	33.9	1.28716e+08	5.41936e+07	7.17615e+07	9.20691e+07	1.15303e+08	1.34775e+08	9.84506e+07	4.29733e+07	1.49691e+08
O14519	CDK2AP1	Cyclin-dependent kinase 2-associated protein 1 OS=Homo sapiens GN=CDK2AP1 PE=1 SV=1	11.3043	12.4	1.52469e+08	1.54028e+08	2.0131e+08		8.98116e+07	8.95438e+07		4.95693e+07
P11802	CDK4	Cell division protein kinase 4 OS=Homo sapiens GN=CDK4 PE=1 SV=2	22.7723	33.7		3.47003e+07	3.07596e+07			1.27321e+07			4.2599e+07
Q00535	CDK5	Cell division protein kinase 5 OS=Homo sapiens GN=CDK5 PE=1 SV=3	31.5068	33.3	8.67213e+07	6.04929e+07	8.37561e+07	45738671	5.76915e+07	43353368	8.83546e+07	5.78795e+07	56247295
Q96SZ6	CDK5RAP1	CDK5 regulatory subunit-associated protein 1 OS=Homo sapiens GN=CDK5RAP1 PE=1 SV=2	43.594	67.6	2.60656e+08	2.49536e+08	2.82676e+08	2.37723e+08	2.06628e+08	2.09484e+08	2.56628e+08	1.36272e+08	2.42379e+08
Q96SN8	CDK5RAP2	CDK5 regulatory subunit-associated protein 2 OS=Homo sapiens GN=CDK5RAP2 PE=1 SV=4	2.32435	214.9
Q96JB5	CDK5RAP3	CDK5 regulatory subunit-associated protein 3 OS=Homo sapiens GN=CDK5RAP3 PE=1 SV=2	44.664	56.9	3.25099e+08	3.55903e+08	3.4246e+08	3.85938e+08	3.50932e+08	3.72607e+08	3.35115e+08	2.04987e+08	3.15377e+08
Q00534	CDK6	Cell division protein kinase 6 OS=Homo sapiens GN=CDK6 PE=1 SV=1	49.6933	36.9	1.82909e+08	1.66579e+08	1.6751e+08	1.06159e+08	9.67152e+07	1.40161e+08	1.58479e+08	1.31352e+08	1.08968e+08
P50613	CDK7	Cell division protein kinase 7 OS=Homo sapiens GN=CDK7 PE=1 SV=1	39.3064	39	1.11048e+08	9.56384e+07	8.84577e+07	1.1736e+08	6.60001e+07	80743243	1.08454e+08	5.64059e+07	1.553e+08
P50750	CDK9	Cell division protein kinase 9 OS=Homo sapiens GN=CDK9 PE=1 SV=3	24.7312	42.8	1.27009e+08	1.16828e+08	1.29037e+08	1.73913e+08	1.02665e+08	2.08233e+08	1.34259e+08	8.38477e+07	1.42843e+08
Q5VV42	CDKAL1	CDK5 regulatory subunit-associated protein 1-like 1 OS=Homo sapiens GN=CDKAL1 PE=1 SV=1	37.4784	65.1	9.74482e+07	7.29542e+07	1.16376e+08	1.07646e+08	1.1798e+08	1.38142e+08	1.3303e+08	3.09232e+07	1.587e+08
O76039	CDKL5	Cyclin-dependent kinase-like 5 OS=Homo sapiens GN=CDKL5 PE=1 SV=1	0.776699	115.5
P38936	CDKN1A	Cyclin-dependent kinase inhibitor 1 OS=Homo sapiens GN=CDKN1A PE=1 SV=3	29.878	18.1					6.15834e+07				19286018
P46527	CDKN1B	Cyclin-dependent kinase inhibitor 1B OS=Homo sapiens GN=CDKN1B PE=1 SV=1	19.1919	22.1
P42771	CDKN2A	Cyclin-dependent kinase inhibitor 2A, isoforms 1/2/3 OS=Homo sapiens GN=CDKN2A PE=1 SV=2	18.5897	16.5	6.59352e+06		7.61717e+06	8.47904e+06			1.25999e+07
Q9NXV6	CDKN2AIP	CDKN2A-interacting protein OS=Homo sapiens GN=CDKN2AIP PE=1 SV=2	25.734	61	5.88998e+07	6.93603e+07	7.79698e+07	5.2342e+07	2.76968e+07	4.33647e+07	1.02395e+08	4.62051e+07	5.39193e+07
Q96HQ2	CDKN2AIPNL	CDKN2AIP N-terminal-like protein OS=Homo sapiens GN=CDKN2AIPNL PE=1 SV=1	40.5172	13.2	2.82652e+08	2.83832e+08	3.1802e+08	3.16275e+08	2.69672e+08	2.72771e+08	3.35078e+08	1.44437e+08	3.19685e+08
Q01850	CDR2	Cerebellar degeneration-related protein 2 OS=Homo sapiens GN=CDR2 PE=1 SV=2	22.0264	51.8	45711092	2.94711e+06	2.65946e+07	19839341	2.93202e+07	2.65758e+07	3.03241e+07		4.26741e+07
Q92903	CDS1	Phosphatidate cytidylyltransferase 1 OS=Homo sapiens GN=CDS1 PE=2 SV=2	12.7983	53.3	5.30613e+06	9.095e+06	1.92157e+07	1.56981e+07	17743047		1.05636e+07	1.16419e+07
O95674	CDS2	Phosphatidate cytidylyltransferase 2 OS=Homo sapiens GN=CDS2 PE=1 SV=1	23.5955	51.4	3.7199e+08	2.21533e+08	4.75028e+08	5.22421e+08	5.14317e+08	5.24797e+08	4.65646e+08	2.74072e+08	4.38678e+08
Q9H211	CDT1	DNA replication factor Cdt1 OS=Homo sapiens GN=CDT1 PE=1 SV=2	4.57875	60.4
Q9UKY7	CDV3	Protein CDV3 homolog OS=Homo sapiens GN=CDV3 PE=1 SV=1	68.9922	27.3	1.75191e+08	1.70167e+08	1.67892e+08	2.07712e+08	2.08543e+08	1.34753e+08	2.39484e+08	1.73181e+08	1.34549e+08
Q9Y232	CDYL	Chromodomain Y-like protein OS=Homo sapiens GN=CDYL PE=1 SV=2	11.3712	66.4	5.16292e+07	42321160	4.54453e+07	4.19566e+07	3.07861e+07	4.39394e+07		1.06086e+07	33651085
P13688	CEACAM1	Carcinoembryonic antigen-related cell adhesion molecule 1 OS=Homo sapiens GN=CEACAM1 PE=1 SV=2	27.3764	57.5	3.03661e+08	3.23503e+08	1.54168e+08	3.50155e+08	2.41545e+08	4.41949e+08	3.90713e+08	2.66365e+08	3.3667e+08
P49715	CEBPA	CCAAT/enhancer-binding protein alpha OS=Homo sapiens GN=CEBPA PE=1 SV=3	2.7933	37.5							4.76625e+07	6.35333e+07
P17676	CEBPB	CCAAT/enhancer-binding protein beta OS=Homo sapiens GN=CEBPB PE=1 SV=2	8.11594	36.1			155764979		25161794	3.02024e+07
P53567	CEBPG	CCAAT/enhancer-binding protein gamma OS=Homo sapiens GN=CEBPG PE=2 SV=1	20.6667	16.4	110937243	1.15604e+08		115640392	129384593	1.32115e+08	1.22629e+08		1.02583e+08
Q03701	CEBPZ	CCAAT/enhancer-binding protein zeta OS=Homo sapiens GN=CEBPZ PE=1 SV=2	45.0664	120.9	5.48487e+08	6.49315e+08	7.15998e+08	6.06571e+08	6.14966e+08	6.34316e+08	5.2434e+08	3.20672e+08	6.2894e+08
P08218	CELA2B	Chymotrypsin-like elastase family member 2B OS=Homo sapiens GN=CELA2B PE=2 SV=2	4.46097	28.8					328115758
Q92879	CELF1	CUG-BP- and ETR-3-like factor 1 OS=Homo sapiens GN=CUGBP1 PE=1 SV=2	26.5432	52	2.52001e+08	2.84289e+08	3.14299e+08	270448461	2.5423e+08	2.56313e+08	252940990	1.53349e+08	2.69591e+08
Q8WUJ3	CEMIP	Protein KIAA1199 OS=Homo sapiens GN=KIAA1199 PE=1 SV=2	22.263	152.9	3.45071e+07	3.65566e+07	3.18284e+07	1.93867e+07	4.97813e+07	4.85062e+07	20111583		7739591
Q9UHN6	CEMIP2	Transmembrane protein 2 OS=Homo sapiens GN=TMEM2 PE=1 SV=1	38.9732	154.3	4.25545e+08	4.09281e+08	4.46525e+08	4.2422e+08	4.25006e+08	4.47579e+08	3.33523e+08	2.29065e+08	3.32342e+08
P07199	CENPB	Major centromere autoantigen B OS=Homo sapiens GN=CENPB PE=1 SV=2	26.3773	65.1	1.11215e+08	1.44465e+08	1.48561e+08	1.29045e+08	1.21757e+08	1.00158e+08	1.41345e+08	104292451	1.17811e+08
Q03188	CENPC	Centromere protein C 1 OS=Homo sapiens GN=CENPC1 PE=1 SV=1	6.15058	106.9	2.01806e+07	4.79889e+07	20120584				2.28565e+07
P49454	CENPF	Centromere protein F OS=Homo sapiens GN=CENPF PE=1 SV=2	14.0187	367.5	3.84223e+07	3.4769e+07	3.64477e+07	2.12897e+07	1.55093e+07	1.87818e+07	2.56213e+07	1.38724e+07	2.67971e+07
Q9H3R5	CENPH	Centromere protein H OS=Homo sapiens GN=CENPH PE=1 SV=1	7.28745	28.5	20550936	2.70057e+07	31746674
Q92674	CENPI	Centromere protein I OS=Homo sapiens GN=CENPI PE=1 SV=2	1.45503	86.7								6.12884e+06
Q9BS16	CENPK	Centromere protein K OS=Homo sapiens GN=CENPK PE=1 SV=1	12.2677	31.6	4.01282e+07	3.5623e+07	2.75318e+07	30657674				1.81132e+07	3.20984e+07
Q9BU64	CENPO	Centromere protein O OS=Homo sapiens GN=CENPO PE=1 SV=1	5	33.8		1.61888e+07					1.34263e+07
Q7L2Z9	CENPQ	Centromere protein Q OS=Homo sapiens GN=CENPQ PE=1 SV=1	5.22388	30.6
Q8N2Z9	CENPS	Centromere protein S OS=Homo sapiens GN=APITD1 PE=1 SV=1	7.97101	15.9			47824245
Q71F23	CENPU	Centromere protein U OS=Homo sapiens GN=MLF1IP PE=1 SV=1	4.30622	47.5	18814464		1.62063e+07					4132486
Q7Z7K6	CENPV	Centromere protein V OS=Homo sapiens GN=CENPV PE=1 SV=1	54.5455	29.9	4.30809e+08	4.32619e+08	1.32274e+09	4.3695e+08	3.78526e+08	4.02882e+08	399248227	2.35523e+08	4.12959e+08
A8MT69	CENPX	Centromere protein X OS=Homo sapiens GN=STRA13 PE=1 SV=1	28.3951	9				3.03185e+07	2.44394e+07	2.81277e+07	2.5857e+07		3.12275e+07
Q9UPN4	CEP131	5-azacytidine-induced protein 1 OS=Homo sapiens GN=AZI1 PE=1 SV=2	23.8227	122	5.84219e+07	5.24293e+07	71198853	47095352	5.1326e+07	4.65108e+07	85302730	4.11917e+07	5.72059e+07
Q9UPV0	CEP164	Centrosomal protein of 164 kDa OS=Homo sapiens GN=CEP164 PE=1 SV=3	0.616438	164.2		144263206
Q5SW79	CEP170	Centrosomal protein of 170 kDa OS=Homo sapiens GN=CEP170 PE=1 SV=1	1.76768	175.2		2.33631e+07
Q9C0D2	CEP295	Leucine-rich repeat-containing protein KIAA1731 OS=Homo sapiens GN=KIAA1731 PE=2 SV=3	1.07651	295
O95684	CEP43	FGFR1 oncogene partner OS=Homo sapiens GN=FGFR1OP PE=1 SV=1	23.5589	43	6.37409e+07	7.23152e+07	7.44943e+07	44102706	9.17102e+07	6.25787e+07	7.25013e+07	3.49489e+07	7.84695e+07
Q53EZ4	CEP55	Centrosomal protein of 55 kDa OS=Homo sapiens GN=CEP55 PE=1 SV=2	3.66379	54.1	8.66486e+06					1.12396e+07			7815195
Q8TAP6	CEP76	Centrosomal protein of 76 kDa OS=Homo sapiens GN=CEP76 PE=1 SV=1	2.42792	74.4
Q6P2H3	CEP85	Coiled-coil domain-containing protein 21 OS=Homo sapiens GN=CCDC21 PE=1 SV=1	5.51181	85.6	1.82454e+07	1.45754e+07	12950986				1.49636e+07	9.39239e+06
Q9Y6K0	CEPT1	Choline/ethanolaminephosphotransferase 1 OS=Homo sapiens GN=CEPT1 PE=1 SV=1	10.5769	46.5	2.5261e+08	2.23817e+08	2.82829e+08	9.23878e+07	2.18199e+08	2.07119e+08	1.95532e+08	9.5656e+07	2.469e+08
Q8TCT0	CERK	Ceramide kinase OS=Homo sapiens GN=CERK PE=1 SV=1	4.46927	59.9									1.59566e+07
P27544	CERS1	LAG1 longevity assurance homolog 1 OS=Homo sapiens GN=LASS1 PE=2 SV=1	4	39.5		16643281	16133477
Q96G23	CERS2	LAG1 longevity assurance homolog 2 OS=Homo sapiens GN=LASS2 PE=1 SV=1	23.1579	44.8	9.32399e+08	8.3642e+08	8.44339e+08	966250416	9.96623e+08	8.74677e+08	7.81618e+08	5.4219e+08	8.73023e+08
Q9HA82	CERS4	LAG1 longevity assurance homolog 4 OS=Homo sapiens GN=LASS4 PE=2 SV=1	15.4822	46.4	8.41329e+07	1.56089e+08	1.77312e+08	194846777	1.40364e+08	1.9625e+08	1.27506e+08	7.52552e+07	1.77519e+08
Q8N5B7	CERS5	LAG1 longevity assurance homolog 5 OS=Homo sapiens GN=LASS5 PE=1 SV=1	9.43878	45.7		6.55474e+07	27050245	1.76567e+07	23745847	24877403	6.37996e+07	1.66781e+07	8.13914e+07
Q6ZMG9	CERS6	LAG1 longevity assurance homolog 6 OS=Homo sapiens GN=LASS6 PE=1 SV=1	3.90625	44.9	103720060								113010830
Q9Y5P4	CERT1	Collagen type IV alpha-3-binding protein OS=Homo sapiens GN=COL4A3BP PE=1 SV=1	13.4615	70.8		4.27172e+06	44460359	4728385
P23141	CES1	Liver carboxylesterase 1 OS=Homo sapiens GN=CES1 PE=1 SV=2	70.194	62.5	5.90239e+09	5.89006e+09	6.67773e+09	5.34531e+09	5145336668	5.573e+09	5.19003e+09	3.86479e+09	5.54675e+09
O00748	CES2	Carboxylesterase 2 OS=Homo sapiens GN=CES2 PE=1 SV=1	43.1127	61.8	7.76939e+08	6.60625e+08	7.69086e+08	6.65513e+08	617926744	7.56773e+08	1.0558e+09	476390701	6.96547e+08
Q6UWW8	CES3	Carboxylesterase 3 OS=Homo sapiens GN=CES3 PE=1 SV=1	17.6883	62.2	1.12549e+08	31819670	46420916		1.46926e+06		6.32466e+07		2.31091e+07
P41208	CETN2	Centrin-2 OS=Homo sapiens GN=CETN2 PE=1 SV=1	45.9302	19.7	292077755	2.74088e+08	2.24868e+08	204440745	162816905	1.09495e+08	1.28786e+08	1.13028e+08	1.60089e+08
O15182	CETN3	Centrin-3 OS=Homo sapiens GN=CETN3 PE=2 SV=2	29.3413	19.5	2.1625e+07	2.58337e+07	2.40005e+07	25258203	1.53613e+07	1.64577e+07	3.57263e+07	9.05455e+06	2.12556e+07
Q9Y6A4	CFAP20	UPF0468 protein C16orf80 OS=Homo sapiens GN=C16orf80 PE=1 SV=1	35.7513	22.8	2.0656e+08	1.9731e+08	1.88259e+08	6.81856e+07	3.55634e+07	1.08315e+08	208376151	9.99179e+07	1.5311e+08
P57076	CFAP298	Uncharacterized protein C21orf59 OS=Homo sapiens GN=C21orf59 PE=1 SV=1	15.1724	33.2	5.2817e+07	7.04065e+07	63926594	75544585	4.72607e+07	38600693		4.98196e+07	52478623
O43822	CFAP410	Uncharacterized protein C21orf2 OS=Homo sapiens GN=C21orf2 PE=1 SV=1	4.29688	28.3	7.57346e+06	8.67963e+06	12078904			9.00814e+06	6.38752e+06	4.12092e+06
P00751	CFB	Complement factor B OS=Homo sapiens GN=CFB PE=1 SV=2	9.42408	85.5		1.60307e+07	1.11915e+07	7430864	5.96285e+07		4.39347e+06		13768253
Q9UEE9	CFDP1	Craniofacial development protein 1 OS=Homo sapiens GN=CFDP1 PE=1 SV=1	3.34448	33.6							4.16827e+07
P05156	CFI	Complement factor I OS=Homo sapiens GN=CFI PE=1 SV=1	22.9846	65.7	2.28704e+08	2.46217e+08	2.15387e+08	2.13449e+08	1.71829e+08	2.28086e+08	2.38782e+08	9.07267e+07	2.69963e+08
P23528	CFL1	Cofilin-1 OS=Homo sapiens GN=CFL1 PE=1 SV=3	83.1325	18.5	6.94931e+09	6.90133e+09	7.93082e+09	8.08016e+09	7.71711e+09	8.00883e+09	8.03549e+09	5.13529e+09	7.56514e+09
Q9Y281	CFL2	Cofilin-2 OS=Homo sapiens GN=CFL2 PE=1 SV=1	70.4819	18.7	3.3012e+08	2.2537e+08	2.72716e+08	3.24256e+08	3.11748e+08	2.99723e+08	2.12716e+08	1.89667e+08	3.64607e+08
Q9UFW8	CGGBP1	CGG triplet repeat-binding protein 1 OS=Homo sapiens GN=CGGBP1 PE=1 SV=2	30.5389	18.8	26294794	4.59424e+07	2.78891e+07	20122452	2.23317e+07	2.5194e+07	25905632	68313326	2.672e+07
Q9P2M7	CGN	Cingulin OS=Homo sapiens GN=CGN PE=1 SV=2	6.09858	136.3		1.49217e+07					1.16618e+07
Q99674	CGREF1	Cell growth regulator with EF hand domain protein 1 OS=Homo sapiens GN=CGREF1 PE=2 SV=2	29.2359	31.9		15204651		1.80622e+07	1.9446e+07	1.97471e+07	2.59668e+07	1.80338e+07
Q6NUI6	CHADL	Chondroadherin-like protein OS=Homo sapiens GN=CHADL PE=2 SV=2	4.19948	82.3
Q13111	CHAF1A	Chromatin assembly factor 1 subunit A OS=Homo sapiens GN=CHAF1A PE=1 SV=2	8.68201	106.9		2.25705e+07				27638338	1.61628e+07	1.02861e+07	40816094
Q13112	CHAF1B	Chromatin assembly factor 1 subunit B OS=Homo sapiens GN=CHAF1B PE=1 SV=1	16.2791	61.5	4.81178e+07	4.1305e+07	7354788	4.40983e+07	1.19023e+07	2.72252e+07	5.18083e+07		2.20161e+07
Q96JM3	CHAMP1	Zinc finger protein 828 OS=Homo sapiens GN=ZNF828 PE=1 SV=2	10.9606	89	3.66776e+07	3.84445e+07	4.11073e+07	4.13998e+07	3.15351e+07	4.0425e+07	5.23611e+07	2.00281e+07	3.97078e+07
Q96BP2	CHCHD1	Coiled-coil-helix-coiled-coil-helix domain-containing protein 1 OS=Homo sapiens GN=CHCHD1 PE=1 SV=1	22.8814	13.5			2.68682e+08				8.12838e+07	234329168
Q8WYQ3	CHCHD10	Coiled-coil-helix-coiled-coil-helix domain-containing protein 10, mitochondrial OS=Homo sapiens GN=CHCHD10 PE=1 SV=1	16.1972	14.1	3.75601e+07	35266920					1.43349e+07	6.72234e+06	3.17195e+07
Q9Y6H1	CHCHD2	Coiled-coil-helix-coiled-coil-helix domain-containing protein 2, mitochondrial OS=Homo sapiens GN=CHCHD2 PE=1 SV=1	19.8675	15.5	4.21796e+08	485853740	7.34683e+08	2.55576e+08	260142779	3.49175e+08	570071971	3.75307e+08	3.59876e+08
Q9NX63	CHCHD3	Coiled-coil-helix-coiled-coil-helix domain-containing protein 3, mitochondrial OS=Homo sapiens GN=CHCHD3 PE=1 SV=1	50.2203	26.1	8.20446e+08	9.68797e+08	1.05688e+09	1.09273e+09	1.02861e+09	1.03055e+09	9.72772e+08	6.2127e+08	9.11117e+08
Q8N4Q1	CHCHD4	Mitochondrial intermembrane space import and assembly protein 40 OS=Homo sapiens GN=CHCHD4 PE=1 SV=1	38.0282	16	1.0081e+08	9.01175e+07	1.25029e+08	5.64329e+07	6.81028e+07	6.618e+07	5.9118e+07	5.35844e+07	8.36838e+07
Q9BSY4	CHCHD5	Coiled-coil-helix-coiled-coil-helix domain-containing protein 5 OS=Homo sapiens GN=CHCHD5 PE=2 SV=1	64.5455	12.4	82755164		7.95638e+07	57840713	13160353		8.84117e+07	9924496
Q9BRQ6	CHCHD6	Coiled-coil-helix-coiled-coil-helix domain-containing protein 6 OS=Homo sapiens GN=CHCHD6 PE=1 SV=1	32.3404	26.4	2.7654e+08	2.66247e+08	2.88101e+08	1.52128e+08	164433737	1.59387e+08	1.85183e+08	120123259	9.78833e+07
O14646	CHD1	Chromodomain-helicase-DNA-binding protein 1 OS=Homo sapiens GN=CHD1 PE=1 SV=2	18.4795	196.6	3.43944e+07	3.49764e+07	4.05592e+07	4.35707e+07	3.59676e+07	3.13052e+07	2.62058e+07	2.62692e+07	3.38496e+07
Q86WJ1	CHD1L	Chromodomain-helicase-DNA-binding protein 1-like OS=Homo sapiens GN=CHD1L PE=1 SV=1	26.4214	100.9	1.07666e+08	1.0508e+08	1.19882e+08	2.0687e+08	1.00842e+08	1.05829e+08	1.98377e+08	1.56533e+08	2.03694e+08
O14647	CHD2	Chromodomain-helicase-DNA-binding protein 2 OS=Homo sapiens GN=CHD2 PE=1 SV=2	19.3107	211.2	5.7856e+07	5.98202e+07	8.53159e+07	5.15553e+07	5.13764e+07	5.56708e+07	3.11823e+07	4.23724e+07	5.73633e+07
Q14839	CHD4	Chromodomain-helicase-DNA-binding protein 4 OS=Homo sapiens GN=CHD4 PE=1 SV=1	42.7824	217.9	6.83782e+08	654971753	7.97029e+08	6.77825e+08	6.12803e+08	6.47379e+08	5.65221e+08	3.33004e+08	6.21642e+08
Q8TDI0	CHD5	Chromodomain-helicase-DNA-binding protein 5 OS=Homo sapiens GN=CHD5 PE=1 SV=1	9.826	222.9
Q8TD26	CHD6	Chromodomain-helicase-DNA-binding protein 6 OS=Homo sapiens GN=CHD6 PE=1 SV=3	2.35727	305.2	8.95285e+07	8.47173e+07		82235062	6.87702e+07	79913414	5.56496e+07	39153278	86542260
Q9P2D1	CHD7	Chromodomain-helicase-DNA-binding protein 7 OS=Homo sapiens GN=CHD7 PE=1 SV=3	4.2042	335.7	26241013	3.40869e+07			18046939		2783578	1.44543e+07
Q9HCK8	CHD8	Chromodomain-helicase-DNA-binding protein 8 OS=Homo sapiens GN=CHD8 PE=1 SV=4	13.1732	290.3	5.44921e+07	4.68886e+07	8.83065e+07		5.0303e+07	35065918	5.63442e+07	4.47781e+07	5.78838e+07
Q3L8U1	CHD9	Chromodomain-helicase-DNA-binding protein 9 OS=Homo sapiens GN=CHD9 PE=1 SV=2	2.03659	325.8									10694405
Q8NE62	CHDH	Choline dehydrogenase, mitochondrial OS=Homo sapiens GN=CHDH PE=2 SV=2	45.7912	65.3	6.30839e+08	4.81057e+08	5.60534e+08	4.37447e+08	4.49414e+08	4.60598e+08	5.67455e+08	2.97843e+08	4.6458e+08
O14757	CHEK1	Serine/threonine-protein kinase Chk1 OS=Homo sapiens GN=CHEK1 PE=1 SV=1	7.77311	54.4			2.83461e+07					1.18866e+07
O96017	CHEK2	Serine/threonine-protein kinase Chk2 OS=Homo sapiens GN=CHEK2 PE=1 SV=1	9.94475	60.9	1.98131e+07	1.46726e+07	40943955	6.36796e+07			1.13036e+07	1.61009e+07
Q8IWX8	CHERP	Calcium homeostasis endoplasmic reticulum protein OS=Homo sapiens GN=CHERP PE=1 SV=2	31.441	103.5	521839057	445823710	5.52281e+08	4.09048e+08	4.32343e+08	3.53798e+08	4.38285e+08	3.09805e+08	483335274
Q9BWS9	CHID1	Chitinase domain-containing protein 1 OS=Homo sapiens GN=CHID1 PE=1 SV=1	52.4173	44.9	1.78769e+08	1.62072e+08	2.19082e+08	2.19947e+08	1.81518e+08	2.28794e+08	1.75385e+08	1.22182e+08	1.99795e+08
P35790	CHKA	Choline kinase alpha OS=Homo sapiens GN=CHKA PE=1 SV=3	28.2276	52.2	8.84261e+07	1.18928e+08	1.14118e+08	9.08492e+07	5.94584e+07	6.83715e+07	1.29989e+08	4.58375e+07	1.19365e+08
Q9Y259	CHKB	Choline/ethanolamine kinase OS=Homo sapiens GN=CHKB PE=1 SV=3	4.81013	45.2
P24386	CHM	Rab proteins geranylgeranyltransferase component A 1 OS=Homo sapiens GN=CHM PE=1 SV=3	3.52221	73.4
Q9HD42	CHMP1A	Charged multivesicular body protein 1a OS=Homo sapiens GN=CHMP1A PE=1 SV=1	13.2653	21.7	2.00098e+08	1.88027e+08	1.59273e+08	2.2155e+08	1.68155e+08	174441941	193811906		2.02095e+08
Q7LBR1	CHMP1B	Charged multivesicular body protein 1b OS=Homo sapiens GN=CHMP1B PE=1 SV=1	4.0201	22.1				196937100	181470306		167093729		144332760
O43633	CHMP2A	Charged multivesicular body protein 2a OS=Homo sapiens GN=CHMP2A PE=1 SV=1	12.1622	25.1	2.02621e+07	1.25496e+07		3.20143e+07	27236092		2.96972e+07		44302792
Q9UQN3	CHMP2B	Charged multivesicular body protein 2b OS=Homo sapiens GN=CHMP2B PE=1 SV=1	4.69484	23.9									5.626e+07
Q9Y3E7	CHMP3	Charged multivesicular body protein 3 OS=Homo sapiens GN=VPS24 PE=1 SV=3	21.6216	25.1	2.01865e+08	1.93108e+08	287766255	6.68851e+07	1.38644e+08	165717612	1.13356e+08	9.60041e+07	1.76431e+08
Q9BY43	CHMP4A	Charged multivesicular body protein 4a OS=Homo sapiens GN=CHMP4A PE=1 SV=3	31.0811	25.1	2.15365e+08	2.11513e+08	2.23449e+08	2.44353e+08	3.19262e+08	2.28854e+08	216399674	1.46929e+08	3.20321e+08
Q9H444	CHMP4B	Charged multivesicular body protein 4b OS=Homo sapiens GN=CHMP4B PE=1 SV=1	39.2857	24.9	5.54877e+08	6.05478e+08	6.97028e+08	5.06946e+08	3.97839e+08	1.03891e+08	677848361	3.68789e+08	4.24279e+08
Q96CF2	CHMP4C	Charged multivesicular body protein 4c OS=Homo sapiens GN=CHMP4C PE=1 SV=1	17.5966	26.4								6.72696e+06
Q9NZZ3	CHMP5	Charged multivesicular body protein 5 OS=Homo sapiens GN=CHMP5 PE=1 SV=1	20.0913	24.6	6.56771e+07	89511901	3.07329e+08	4.98796e+07	1.68607e+08	168462658	1.31423e+08	1.19115e+08	1.55479e+08
Q96FZ7	CHMP6	Charged multivesicular body protein 6 OS=Homo sapiens GN=CHMP6 PE=1 SV=3	42.2886	23.5	2.92083e+08	3.05571e+08	3.02746e+08	2.85816e+08	281207692	2.75762e+08	2.29607e+08	1.90722e+08	2.63932e+08
Q8WUX9	CHMP7	Charged multivesicular body protein 7 OS=Homo sapiens GN=CHMP7 PE=1 SV=1	18.543	50.9	2.45342e+07	53115431	3.26254e+07	2.34857e+07	2.14721e+07	1.59685e+07	3.10409e+07	1.20208e+07	2.14332e+07
P15882	CHN1	N-chimaerin OS=Homo sapiens GN=CHN1 PE=1 SV=3	9.36819	53.1	88524939	74265936	97556455	87714434	7.44411e+07		69694606	4.06057e+07	92073472
P52757	CHN2	Beta-chimaerin OS=Homo sapiens GN=CHN2 PE=1 SV=2	4.05983	53.9
Q9UHD1	CHORDC1	Cysteine and histidine-rich domain-containing protein 1 OS=Homo sapiens GN=CHORDC1 PE=1 SV=2	63.253	37.5	1.45426e+08	1.61552e+08	2.04609e+08	217060816	2.2433e+08	1.90495e+08	1.92434e+08	1.25112e+08	1.69917e+08
Q99653	CHP1	Calcium-binding protein p22 OS=Homo sapiens GN=CHP PE=1 SV=3	49.2308	22.4	3.23067e+08	3.3257e+08	3.07883e+08	347984768	3.44334e+08	2.06716e+08	3.68276e+08	2.19555e+08	2.7617e+08
Q8IZ52	CHPF	Chondroitin sulfate synthase 2 OS=Homo sapiens GN=CHPF PE=1 SV=1	10.7097	85.4	1.46389e+07	1.59722e+07	22446469	26533692	1.14586e+07	4.66899e+07	1.2045e+07		1.37374e+07
Q8WUD6	CHPT1	Cholinephosphotransferase 1 OS=Homo sapiens GN=CHPT1 PE=1 SV=1	9.60591	45.1	67763122	65816187	1.74508e+08	50006103	4.0174e+07	3.46945e+07	1.57271e+08	9.89403e+07	1.46108e+08
Q9NRG0	CHRAC1	Chromatin accessibility complex protein 1 OS=Homo sapiens GN=CHRAC1 PE=1 SV=1	40.458	14.7	1.69104e+08	1.73053e+08	1.62955e+08	1.55365e+08	8.62185e+07	1.44311e+08	1.35871e+08	7.11311e+07	1.27157e+08
Q9NRB3	CHST12	Carbohydrate sulfotransferase 12 OS=Homo sapiens GN=CHST12 PE=1 SV=2	4.58937	48.4	2479267
Q8NET6	CHST13	Carbohydrate sulfotransferase 13 OS=Homo sapiens GN=CHST13 PE=2 SV=1	24.3402	38.9	48954304	5.00799e+07	1.02107e+08			8.04427e+07
Q8NCH0	CHST14	Carbohydrate sulfotransferase 14 OS=Homo sapiens GN=CHST14 PE=1 SV=2	9.57447	43	4.84428e+07	4.86616e+07	3.90406e+07				4.31241e+07	1.37725e+07	3.9359e+07
Q7LGC8	CHST3	Carbohydrate sulfotransferase 3 OS=Homo sapiens GN=CHST3 PE=1 SV=3	3.34029	54.7							4.84242e+07	2.8489e+07
Q9NS84	CHST7	Carbohydrate sulfotransferase 7 OS=Homo sapiens GN=CHST7 PE=1 SV=2	2.46914	54.2
Q86X52	CHSY1	Chondroitin sulfate synthase 1 OS=Homo sapiens GN=CHSY1 PE=1 SV=3	2.61845	91.7
Q8WVB6	CHTF18	Chromosome transmission fidelity protein 18 homolog OS=Homo sapiens GN=CHTF18 PE=1 SV=1	12.9231	107.3	8.45658e+06	5.51937e+06	1.11192e+07		1.36189e+07	1.22168e+07			1.21678e+07
Q8WV66	CHTF8	Chromosome transmission fidelity protein 8 homolog OS=Homo sapiens GN=CHTF8 PE=1 SV=3	22.314	13.3	8.12747e+06								5.01665e+06
Q9Y3Y2	CHTOP	Uncharacterized protein C1orf77 OS=Homo sapiens GN=C1orf77 PE=1 SV=2	28.2258	26.4	2.79985e+08	2.7146e+08	417079370	2.99934e+08	3.58914e+08	2.95227e+08	3.35071e+08	2.74171e+08	4.41382e+08
O15111	CHUK	Inhibitor of nuclear factor kappa-B kinase subunit alpha OS=Homo sapiens GN=CHUK PE=1 SV=1	16.2416	84.6	9.49789e+06	2.37636e+07	3.47003e+07	9.32248e+06	1.77799e+07	2.74731e+07	2.79947e+07		2.66006e+07
O76071	CIAO1	Probable cytosolic iron-sulfur protein assembly protein CIAO1 OS=Homo sapiens GN=CIAO1 PE=1 SV=1	14.4543	37.8	1.45718e+08	1.56038e+08	8.05993e+07	1.67105e+08	6.63294e+07	156247043	1.20418e+08	8.42442e+07	1.1194e+08
Q9H5X1	CIAO2A	Protein FAM96A OS=Homo sapiens GN=FAM96A PE=1 SV=1	21.25	18.3						53747947			7.63242e+07
Q9Y3D0	CIAO2B	Protein FAM96B OS=Homo sapiens GN=FAM96B PE=1 SV=1	87.7301	17.7	1.10931e+08	1.37396e+08	1.20659e+08	1.12494e+08	9.31919e+07	4.68079e+07	6.94386e+07	4.25653e+07	1.13736e+08
Q6FI81	CIAPIN1	Anamorsin OS=Homo sapiens GN=CIAPIN1 PE=1 SV=2	52.8846	33.6	1.80725e+08	2.30739e+08	2.6085e+08	3.21658e+08	8.92374e+07	2.88689e+08	1.1053e+08	1.28762e+08	3.20625e+08
Q99828	CIB1	Calcium and integrin-binding protein 1 OS=Homo sapiens GN=CIB1 PE=1 SV=4	41.8848	21.7	1.38834e+08	1.24048e+08	1.75873e+08	1.88477e+08	1.2999e+08	1.92302e+08	1.57161e+08	100114014	1.59165e+08
Q96RK0	CIC	Protein capicua homolog OS=Homo sapiens GN=CIC PE=1 SV=2	1.1194	163.7
Q9UHD4	CIDEB	Cell death activator CIDE-B OS=Homo sapiens GN=CIDEB PE=1 SV=2	6.39269	24.7								1.90171e+06
Q8IUL8	CILP2	Cartilage intermediate layer protein 2 OS=Homo sapiens GN=CILP2 PE=2 SV=2	1.47059	126.2
Q8TCG1	CIP2A	Protein CIP2A OS=Homo sapiens GN=KIAA1524 PE=1 SV=2	1.21547	102.1
Q14011	CIRBP	Cold-inducible RNA-binding protein OS=Homo sapiens GN=CIRBP PE=1 SV=1	26.7442	18.6	7.69798e+08	745476977	8.23736e+08	7.24682e+08	6.76474e+08	6.61233e+08	7.69286e+08	4.77721e+08	7.52648e+08
Q9NZ45	CISD1	CDGSH iron sulfur domain-containing protein 1 OS=Homo sapiens GN=CISD1 PE=1 SV=1	73.1481	12.2	2.27324e+09	2.34804e+09	3003620271	1.99633e+09	1.90594e+09	2.00433e+09	1.31176e+09	9.24664e+08	1.61921e+09
Q8N5K1	CISD2	CDGSH iron sulfur domain-containing protein 2 OS=Homo sapiens GN=CISD2 PE=1 SV=1	53.3333	15.3	9.66169e+08	9.51959e+08	1.04656e+09	8.61566e+08	8.79582e+08	1.0972e+09	9.58402e+08	6.21026e+08	1.03318e+09
O14578	CIT	Citron Rho-interacting kinase OS=Homo sapiens GN=CIT PE=1 SV=2	3.60138	231.3		19324812	2.5547e+07			1.75713e+07	1.97779e+07		12033967
Q8WWK9	CKAP2	Cytoskeleton-associated protein 2 OS=Homo sapiens GN=CKAP2 PE=1 SV=1	7.02782	76.9	31856167	37357483	4.34861e+07	49764451	6.12685e+07	24239304		1.93676e+07	3.37207e+07
Q8IYA6	CKAP2L	Cytoskeleton-associated protein 2-like OS=Homo sapiens GN=CKAP2L PE=1 SV=3	1.87919	83.5	2.05688e+07
Q07065	CKAP4	Cytoskeleton-associated protein 4 OS=Homo sapiens GN=CKAP4 PE=1 SV=2	62.7907	66	5.37099e+09	5.16107e+09	5.58874e+09	5.41358e+09	4.98278e+09	4.89169e+09	4.80051e+09	2.92415e+09	4.57541e+09
Q14008	CKAP5	Cytoskeleton-associated protein 5 OS=Homo sapiens GN=CKAP5 PE=1 SV=3	42.4705	225.4	5.07538e+08	4.67179e+08	472976243	4.91071e+08	3.97831e+08	5.10822e+08	4.22443e+08	3.0916e+08	4.35423e+08
P12277	CKB	Creatine kinase B-type OS=Homo sapiens GN=CKB PE=1 SV=1	54.5932	42.6	8.44172e+08	7.59914e+08	8.56611e+08	882191246	7.21058e+08	8.20463e+08	8.88344e+08	5.12185e+08	9.11315e+08
P12532	CKMT1A	Creatine kinase U-type, mitochondrial OS=Homo sapiens GN=CKMT1A PE=1 SV=1	39.0887	47	5.64998e+07	6.99895e+07	8.27337e+07		60668719	6.01519e+07	6.07392e+07	39000926	7.14463e+07
P61024	CKS1B	Cyclin-dependent kinases regulatory subunit 1 OS=Homo sapiens GN=CKS1B PE=1 SV=1	32.9114	9.7	1.69826e+08	268630365	2.79813e+08	1.5587e+08	2.27467e+08	205937631	154673162	1.13958e+08	2.60715e+08
P33552	CKS2	Cyclin-dependent kinases regulatory subunit 2 OS=Homo sapiens GN=CKS2 PE=1 SV=1	24.0506	9.9	87407810	1.3757e+08	108252979	38203362	70537635	83129920	1.40042e+08		6.90439e+07
Q7Z460	CLASP1	CLIP-associating protein 1 OS=Homo sapiens GN=CLASP1 PE=1 SV=1	30.2341	169.3	1.51233e+08	1.51542e+08	1.76596e+08	1.49122e+08	1.36026e+08	158351489	134499856	8.50604e+07	1.53499e+08
O75122	CLASP2	CLIP-associating protein 2 OS=Homo sapiens GN=CLASP2 PE=1 SV=2	12.5966	141	1.05938e+07	2.29292e+07	2.08045e+07	1.83194e+07	11887993		2.26577e+07	7.94151e+06
Q8N2M8	CLASRP	Splicing factor, arginine/serine-rich 16 OS=Homo sapiens GN=SFRS16 PE=1 SV=4	12.3145	77.1	4.76339e+07	4.49346e+07	4.2006e+07	4.6386e+07	2.83598e+07	3.12625e+07	6.64504e+07	2.34228e+07	4.98176e+07
Q96S66	CLCC1	Chloride channel CLIC-like protein 1 OS=Homo sapiens GN=CLCC1 PE=1 SV=1	34.8457	62	9.23726e+07	9.58587e+07	1.27053e+08	6.44438e+07	5.24596e+07	6.23381e+07	8.6915e+07	4.07074e+07	8.8979e+07
P51790	CLCN3	H(+)/Cl(-) exchange transporter 3 OS=Homo sapiens GN=CLCN3 PE=1 SV=2	3.30073	90.9
P51795	CLCN5	H(+)/Cl(-) exchange transporter 5 OS=Homo sapiens GN=CLCN5 PE=1 SV=1	7.7748	83.1		2.09765e+07	27593228
P51797	CLCN6	Chloride transport protein 6 OS=Homo sapiens GN=CLCN6 PE=1 SV=1	1.72612	97.2					4.7006e+07
P51798	CLCN7	H(+)/Cl(-) exchange transporter 7 OS=Homo sapiens GN=CLCN7 PE=1 SV=2	14.7826	88.6	1.10047e+08	1.08242e+08	1.03031e+08	1.34518e+08	1.22701e+08	1.22001e+08	5.43454e+07	4.91045e+07	6.89441e+07
O95832	CLDN1	Claudin-1 OS=Homo sapiens GN=CLDN1 PE=1 SV=1	14.6919	22.7	363825472	4.1627e+08	5.05144e+08	4.11773e+08	3.60831e+08	422973313	4.02544e+08	2.35406e+08	4.36688e+08
Q8N6F1	CLDN19	Claudin-19 OS=Homo sapiens GN=CLDN19 PE=1 SV=2	7.14286	23.2				3.25657e+07				2.49029e+07	5.64027e+07
P56747	CLDN6	Claudin-6 OS=Homo sapiens GN=CLDN6 PE=1 SV=2	17.2727	23.3	7.40727e+08	6.77156e+08	1053951605	6.71544e+08	6.62192e+08	1.05152e+09	8.49332e+08	5.25712e+08	7.8116e+08
Q9NY35	CLDND1	Claudin domain-containing protein 1 OS=Homo sapiens GN=CLDND1 PE=1 SV=1	5.5336	28.6					80260608
Q2KHT3	CLEC16A	Protein CLEC16A OS=Homo sapiens GN=CLEC16A PE=2 SV=2	5.50807	117.6		19371265	1.27378e+07		20262496			1.44234e+07	2.8655e+07
O14967	CLGN	Calmegin OS=Homo sapiens GN=CLGN PE=1 SV=1	47.0492	70	2.50292e+08	2.60579e+08	3.04575e+08	2.20373e+08	1.90607e+08	2.67129e+08	1.77938e+08	1.10698e+08	1.95174e+08
O00299	CLIC1	Chloride intracellular channel protein 1 OS=Homo sapiens GN=CLIC1 PE=1 SV=4	82.5726	26.9	3057072552	3094847437	3.19907e+09	3.80153e+09	3407898286	3.74384e+09	3.5122e+09	2.20962e+09	3.28177e+09
O95833	CLIC3	Chloride intracellular channel protein 3 OS=Homo sapiens GN=CLIC3 PE=1 SV=2	18.2203	26.6	1.33221e+07	1.27086e+07	1.98674e+07
Q9Y696	CLIC4	Chloride intracellular channel protein 4 OS=Homo sapiens GN=CLIC4 PE=1 SV=4	73.913	28.8	2.79067e+08	3.02843e+08	2.93317e+08	3.12236e+08	2.92796e+08	3.21891e+08	3.06616e+08	2.28975e+08	2.861e+08
Q96NY7	CLIC6	Chloride intracellular channel protein 6 OS=Homo sapiens GN=CLIC6 PE=2 SV=3	2.41477	73							1.76124e+07
Q14677	CLINT1	Clathrin interactor 1 OS=Homo sapiens GN=CLINT1 PE=1 SV=1	25.6	68.2	2.7141e+08	2.45288e+08	305465485	2.02766e+08	2.43313e+08	249286539	274322318	2.61347e+08	2.07619e+08
P30622	CLIP1	CAP-Gly domain-containing linker protein 1 OS=Homo sapiens GN=CLIP1 PE=1 SV=2	9.87483	162.1	1.82119e+07	1.53819e+07	52381901		1.63085e+07	1.21108e+07	1.76504e+07	1.26919e+07	1.74041e+07
Q9UDT6	CLIP2	CAP-Gly domain-containing linker protein 2 OS=Homo sapiens GN=CLIP2 PE=1 SV=1	14.0535	115.8	1.96994e+07	1.61026e+07	3.40046e+07	1.54197e+07	3.60119e+07	15388557	22019445	7.13981e+06
P49759	CLK1	Dual specificity protein kinase CLK1 OS=Homo sapiens GN=CLK1 PE=1 SV=2	23.5537	57.3			3.21455e+07	2.88931e+07			6.06372e+07		7.5009e+07
P49761	CLK3	Dual specificity protein kinase CLK3 OS=Homo sapiens GN=CLK3 PE=1 SV=3	25.7053	73.5	8.10954e+07	1.20146e+08	1.07725e+08	6.79043e+06	1.03962e+08	9.34423e+07	7.59758e+07	5.54514e+07	162801658
Q9HAZ1	CLK4	Dual specificity protein kinase CLK4 OS=Homo sapiens GN=CLK4 PE=1 SV=1	12.474	57.5	25619155	3.21666e+07	3.84615e+07	2.06795e+07	1.75167e+07	29813300	2.45817e+07	18372865	3.9882e+07
Q96JQ2	CLMN	Calmin OS=Homo sapiens GN=CLMN PE=1 SV=1	10.5788	111.6	2.79227e+07	10714197	2.63055e+07	1.59906e+07	1.17039e+07	1.30676e+07	24143590	4.18315e+06	2.21053e+07
Q13286	CLN3	Battenin OS=Homo sapiens GN=CLN3 PE=1 SV=1	10.5023	47.6	5.03497e+07	5.17076e+07	76029083	5.46091e+07	4.98066e+07	1.3577e+08	94155923	4.86222e+07	1.39524e+08
O75503	CLN5	Ceroid-lipofuscinosis neuronal protein 5 OS=Homo sapiens GN=CLN5 PE=1 SV=2	17.0391	41.5	5.99421e+07	1.11327e+07				6.16597e+07	5.74007e+07		6.35152e+07
Q9NWW5	CLN6	Ceroid-lipofuscinosis neuronal protein 6 OS=Homo sapiens GN=CLN6 PE=1 SV=1	14.4695	35.9
Q9UBY8	CLN8	Protein CLN8 OS=Homo sapiens GN=CLN8 PE=1 SV=3	11.8881	32.8			3.98032e+07	3.22497e+07	2.05779e+07	3.42527e+07	2.97028e+07	1.59684e+07
P54105	CLNS1A	Methylosome subunit pICln OS=Homo sapiens GN=CLNS1A PE=1 SV=1	46.4135	26.2	9.93053e+07	1.18161e+08	9.01191e+07	56177020	5.43734e+07	40552372	7.30685e+07	1.01606e+08	4.31789e+07
Q92989	CLP1	Polyribonucleotide 5'-hydroxyl-kinase Clp1 OS=Homo sapiens GN=CLP1 PE=1 SV=1	8.94118	47.6	2.32885e+07	2.64012e+07	9.34296e+06			3.14259e+07	8.69662e+06		2.73752e+06
Q9H078	CLPB	Caseinolytic peptidase B protein homolog OS=Homo sapiens GN=CLPB PE=1 SV=1	47.2419	78.7	3.5937e+08	3.5996e+08	4.2392e+08	3.21497e+08	277035327	2.86037e+08	3.05657e+08	2.15237e+08	2.74942e+08
Q16740	CLPP	Putative ATP-dependent Clp protease proteolytic subunit, mitochondrial OS=Homo sapiens GN=CLPP PE=1 SV=1	30.6859	30.2	3.25327e+08	3.19771e+08	3.9121e+08	259173170	2.93607e+08	3.41309e+08	2.92326e+08	1.93137e+08	3.64743e+08
O96005	CLPTM1	Cleft lip and palate transmembrane protein 1 OS=Homo sapiens GN=CLPTM1 PE=1 SV=1	41.4051	76	4.14533e+08	4.04517e+08	3.78643e+08	3.9073e+08	4.23575e+08	3.74113e+08	3.72904e+08	2.83822e+08	3.20725e+08
Q96KA5	CLPTM1L	Cleft lip and palate transmembrane protein 1-like protein OS=Homo sapiens GN=CLPTM1L PE=1 SV=1	28.6245	62.2	2.33917e+08	1.49074e+08	2.8036e+08	1.42693e+08	1.16874e+08	1.28323e+08	1.93449e+08	7.60506e+07	1.15107e+08
O76031	CLPX	ATP-dependent Clp protease ATP-binding subunit clpX-like, mitochondrial OS=Homo sapiens GN=CLPX PE=1 SV=2	56.2401	69.2	6.70728e+08	6.32012e+08	7.15128e+08	635133155	6.18703e+08	671112716	5.30233e+08	3.70983e+08	6.50903e+08
O94985	CLSTN1	Calsyntenin-1 OS=Homo sapiens GN=CLSTN1 PE=1 SV=1	6.21814	109.7
P09496	CLTA	Clathrin light chain A OS=Homo sapiens GN=CLTA PE=1 SV=1	13.3065	27.1	7.57367e+08	1.08582e+09	7.99802e+08	7.14875e+08	7.44357e+08	5.04573e+08	5.37318e+08	5.44459e+08	5.07164e+08
P09497	CLTB	Clathrin light chain B OS=Homo sapiens GN=CLTB PE=1 SV=1	13.5371	25.2	127684037		2.23325e+08				112729216	5.3245e+07	5.51366e+07
Q00610	CLTC	Clathrin heavy chain 1 OS=Homo sapiens GN=CLTC PE=1 SV=5	70.0299	191.5	3.63315e+09	3.63689e+09	4.32391e+09	3.84347e+09	3.6116e+09	3911063825	3978989674	2.69115e+09	4.14599e+09
P10909	CLU	Clusterin OS=Homo sapiens GN=CLU PE=1 SV=1	29.1759	52.5	4.25056e+08	428225057	4.87199e+08	5.65414e+08	4.57117e+08	3.93874e+08	4.14697e+08	2.29874e+08	4.12642e+08
O75153	CLUH	Protein KIAA0664 OS=Homo sapiens GN=KIAA0664 PE=1 SV=2	43.9267	146.6	2.26054e+08	2.0374e+08	2.78139e+08	2.4335e+08	2.49871e+08	2.84403e+08	2.85624e+08	2.11243e+08	3.12458e+08
Q8N0X4	CLYBL	Citrate lyase subunit beta-like protein, mitochondrial OS=Homo sapiens GN=CLYBL PE=2 SV=2	45.5882	37.3	1.91102e+08	231807201	2.61222e+08	1.72819e+08	1.70625e+08	1.90436e+08	2.23499e+08	1.2991e+08	1.76227e+08
Q8NFW8	CMAS	N-acylneuraminate cytidylyltransferase OS=Homo sapiens GN=CMAS PE=1 SV=2	39.8618	48.3	302450588	2.89466e+08	3.4237e+08	2.62639e+08	2.44969e+08	2.31572e+08	1.64449e+08	1.54495e+08	235180388
Q96DG6	CMBL	Carboxymethylenebutenolidase homolog OS=Homo sapiens GN=CMBL PE=1 SV=1	37.551	28	9.45216e+07	1.23196e+08	9.78938e+07	1.19448e+08	6.97274e+07	1.0355e+08	1.30905e+08	5.58478e+07	1.27798e+08
Q7Z7K0	CMC1	COX assembly mitochondrial protein homolog OS=Homo sapiens GN=CMC1 PE=1 SV=1	43.3962	12.5	3.33802e+08	4.7818e+08	3.33861e+08	3.39665e+08	3.40388e+08	3.69591e+08	7.37923e+08	2.69172e+08	3.30779e+08
Q8IY22	CMIP	C-Maf-inducing protein OS=Homo sapiens GN=CMIP PE=1 SV=2	10.8254	82.9	1.10003e+07	1.26934e+07	8.4318e+06	2.01716e+07	1.22474e+07	14948370	5.71768e+06		9.12543e+06
P30085	CMPK1	UMP-CMP kinase OS=Homo sapiens GN=CMPK1 PE=1 SV=3	61.7347	22.2	8.85511e+08	8.84146e+08	9.84776e+08	8.6927e+08	933577818	1.01834e+09	9.50425e+08	6.02792e+08	1.02914e+09
Q9BQ75	CMSS1	Uncharacterized protein C3orf26 OS=Homo sapiens GN=C3orf26 PE=1 SV=2	33.6918	31.9	1.26679e+08	1.40038e+08	1.31998e+08	7.60552e+07	9.50893e+07	1.19227e+08	1.27502e+08	8.21869e+07	1.34196e+08
Q9NX76	CMTM6	CKLF-like MARVEL transmembrane domain-containing protein 6 OS=Homo sapiens GN=CMTM6 PE=1 SV=1	16.3934	20.4	6.53187e+07		6.38415e+06	5.99705e+07	63843806	89665894			6.84094e+07
Q8IZV2	CMTM8	CKLF-like MARVEL transmembrane domain-containing protein 8 OS=Homo sapiens GN=CMTM8 PE=2 SV=2	15.0289	19.6	127952442	25900160	128841806	1.72925e+08	1.45926e+08	1.67051e+08	8.99374e+07	6.26746e+07	1.30776e+08
Q8N1G2	CMTR1	S-adenosyl-L-methionine-dependent methyltransferase FTSJD2 OS=Homo sapiens GN=FTSJD2 PE=1 SV=1	34.1317	95.3	1.50028e+08	135127533	1.56016e+08	1.31312e+08	1.10658e+08	9.87398e+07	1.44205e+08	6.461e+07	1.36594e+08
Q8N3K9	CMYA5	Cardiomyopathy-associated protein 5 OS=Homo sapiens GN=CMYA5 PE=1 SV=3	1.15507	448.9					816861294
P62633	CNBP	Cellular nucleic acid-binding protein OS=Homo sapiens GN=CNBP PE=1 SV=1	38.9831	19.5	1.82826e+08	2.44503e+08	2.69136e+08	2.05363e+08	1.81789e+08	2.31391e+08	1.42968e+08	8.73839e+07	2.59448e+08
Q96KP4	CNDP2	Cytosolic non-specific dipeptidase OS=Homo sapiens GN=CNDP2 PE=1 SV=2	70.3158	52.8	2.68996e+08	3.24466e+08	297015217	3.99191e+08	3.73981e+08	3.9953e+08	3.96168e+08	2.47386e+08	3.64169e+08
Q8N9A8	CNEP1R1	Transmembrane protein 188 OS=Homo sapiens GN=TMEM188 PE=2 SV=1	20	14.3			67566883
Q9P003	CNIH4	Protein cornichon homolog 4 OS=Homo sapiens GN=CNIH4 PE=1 SV=1	14.3885	16.1	1.88491e+08	432426378	1.75842e+08	108131091	143812936	988297383	1.84168e+08	120679518	7.56076e+08
Q8WXI2	CNKSR2	Connector enhancer of kinase suppressor of ras 2 OS=Homo sapiens GN=CNKSR2 PE=1 SV=1	0.773694	117.5									1.50874e+08
Q6P9H4	CNKSR3	Connector enhancer of kinase suppressor of ras 3 OS=Homo sapiens GN=CNKSR3 PE=1 SV=1	3.06306	61.9
Q99439	CNN2	Calponin-2 OS=Homo sapiens GN=CNN2 PE=1 SV=4	36.5696	33.7	3.73393e+08	4.01773e+08	3.83197e+08	3.08515e+08	2.51146e+08	2.56555e+08	4.38733e+08	2.75442e+08	4.04182e+08
Q15417	CNN3	Calponin-3 OS=Homo sapiens GN=CNN3 PE=1 SV=1	44.9848	36.4	2.40488e+08	2.48462e+08	2.91591e+08	2.34885e+08	2.19251e+08	2.14215e+08	2.85331e+08	1.81842e+08	2.27671e+08
Q9H8M5	CNNM2	Metal transporter CNNM2 OS=Homo sapiens GN=CNNM2 PE=2 SV=2	10.9714	96.6	2.50132e+07	3.25149e+07	1.7916e+07	29585892	2.60724e+07	32456288	1.8951e+07	1.32557e+07	2.44099e+07
Q8NE01	CNNM3	Metal transporter CNNM3 OS=Homo sapiens GN=CNNM3 PE=1 SV=1	25.3182	76.1	4.38454e+07	3.88879e+07	62976031	6.5991e+07	5.4354e+07	1.1868e+08	5.64694e+07	1.54818e+07	5.72268e+07
Q6P4Q7	CNNM4	Metal transporter CNNM4 OS=Homo sapiens GN=CNNM4 PE=1 SV=3	19.6129	86.6	67053618	4.1755e+07	4.62517e+07	3.58835e+07	3.68415e+07	2.23411e+07	2.86066e+07	1.79582e+07	1.53373e+07
A5YKK6	CNOT1	CCR4-NOT transcription complex subunit 1 OS=Homo sapiens GN=CNOT1 PE=1 SV=2	28.4933	266.8	1.38784e+08	1.24654e+08	1.38001e+08	9.55884e+07	1.16602e+08	1.1691e+08	1.25937e+08	9.71847e+07	1.18859e+08
Q9H9A5	CNOT10	CCR4-NOT transcription complex subunit 10 OS=Homo sapiens GN=CNOT10 PE=1 SV=1	21.7742	82.3	6.71959e+07	5.87489e+07	5.52179e+07	6.44089e+07	3.60163e+07	7.00011e+07	6.5054e+07	2.58662e+07	6.33475e+07
Q9UKZ1	CNOT11	UPF0760 protein C2orf29 OS=Homo sapiens GN=C2orf29 PE=1 SV=1	24.902	55.2	7.65324e+07	6.58987e+07	5.36456e+07	6.03365e+07	4.15649e+07	6.37328e+07	6.50332e+07	3.8296e+07	4.87479e+07
Q9NZN8	CNOT2	CCR4-NOT transcription complex subunit 2 OS=Homo sapiens GN=CNOT2 PE=1 SV=1	20.7407	59.7	3.08352e+07	3.19662e+07	2.54928e+07				1.33297e+07	7.46228e+07
O75175	CNOT3	CCR4-NOT transcription complex subunit 3 OS=Homo sapiens GN=CNOT3 PE=1 SV=1	18.3267	81.8	8.26007e+07	8.33243e+07	1.01889e+08	3.00607e+07	8.22729e+07	4.8594e+07	6.24925e+07	6.4434e+07	5.78324e+07
Q9ULM6	CNOT6	CCR4-NOT transcription complex subunit 6 OS=Homo sapiens GN=CNOT6 PE=1 SV=2	1.79533	63.3		16462560
Q9UIV1	CNOT7	CCR4-NOT transcription complex subunit 7 OS=Homo sapiens GN=CNOT7 PE=1 SV=3	25.9649	32.7	56143281	5.18489e+07	9.32661e+07	8.48963e+07	71130674		67076133	3.63295e+07	9.45297e+07
Q9UFF9	CNOT8	CCR4-NOT transcription complex subunit 8 OS=Homo sapiens GN=CNOT8 PE=1 SV=1	4.79452	33.5
Q92600	CNOT9	Cell differentiation protein RCD1 homolog OS=Homo sapiens GN=RQCD1 PE=1 SV=1	26.4214	33.6	6.12299e+07	5.14991e+07	9.59338e+07	8.44735e+07	6.96307e+07	94630715	48452661	3.75428e+07	9.88595e+07
P09543	CNP	2',3'-cyclic-nucleotide 3'-phosphodiesterase OS=Homo sapiens GN=CNP PE=1 SV=2	48.4561	47.5	1.03055e+09	1.04747e+09	1.17333e+09	9.10527e+08	9.08776e+08	9.15993e+08	8.41596e+08	7.31108e+08	9.10704e+08
Q9Y2B0	CNPY2	Protein canopy homolog 2 OS=Homo sapiens GN=CNPY2 PE=1 SV=1	64.8352	20.6	1.82897e+09	1.82028e+09	2.13505e+09	1.85632e+09	1.49534e+09	1.65427e+09	1.81519e+09	1.23029e+09	1847128584
Q9BT09	CNPY3	Protein canopy homolog 3 OS=Homo sapiens GN=CNPY3 PE=1 SV=1	21.223	30.7	4.75515e+07	9.64544e+07	4.2333e+07	67566637	1.02322e+08	1.04264e+08	7.63133e+07	43724492	8.28419e+07
Q8N129	CNPY4	Protein canopy homolog 4 OS=Homo sapiens GN=CNPY4 PE=2 SV=1	17.3387	28.3	4.81327e+07	5.54821e+07	6.34466e+07	5.64183e+07	4.04186e+07	4.36817e+07	7.83756e+07	3.7473e+07	8.97347e+07
P78357	CNTNAP1	Contactin-associated protein 1 OS=Homo sapiens GN=CNTNAP1 PE=1 SV=1	13.2225	156.2	3.40638e+07	5.90636e+07	3.93127e+07	4.77011e+07	43942617		4.81481e+06	2.0971e+07	1.67745e+07
Q7Z7A1	CNTRL	Centriolin OS=Homo sapiens GN=CEP110 PE=1 SV=2	0.645161	268.7	3.46879e+07	28356090	6.25217e+07			1.14518e+08
Q9GZY4	COA1	Uncharacterized protein C7orf44 OS=Homo sapiens GN=C7orf44 PE=1 SV=1	32.1918	16.7	3.69292e+07	105116131	1.05862e+08	109074410	111370132	1.05711e+08	8.14328e+07	6.64005e+07	1.90852e+07
Q9Y2R0	COA3	Coiled-coil domain-containing protein 56 OS=Homo sapiens GN=CCDC56 PE=1 SV=1	47.1698	11.7	7.19049e+08	6.76899e+08	6.93226e+08	8.42002e+08	7.00942e+08	982867580	330152483	5.21915e+08	6.75271e+08
Q9NYJ1	COA4	Coiled-coil-helix-coiled-coil-helix domain-containing protein 8 OS=Homo sapiens GN=CHCHD8 PE=1 SV=2	39.0805	10.1		3.97967e+07						17895676	200293168
Q86WW8	COA5	Uncharacterized protein C2orf64 OS=Homo sapiens GN=C2orf64 PE=1 SV=1	24.3243	8.4		22756666	25609365	1.51757e+07
Q5JTJ3	COA6	Uncharacterized protein C1orf31 OS=Homo sapiens GN=C1orf31 PE=2 SV=1	34.4	14.1	4.2022e+08	4.70311e+08	4.91445e+08	4.44289e+08	4.41773e+08	4.32201e+08	4.20627e+08	3.29792e+08	1.87714e+08
Q96BR5	COA7	Hcp beta-lactamase-like protein C1orf163 OS=Homo sapiens GN=C1orf163 PE=1 SV=2	35.0649	25.7	7.05666e+07	2.22546e+08	2.06827e+08	205480668	1.63006e+08	1.75617e+08	1.66898e+08	1.252e+08	1.19909e+08
Q13057	COASY	Bifunctional coenzyme A synthase OS=Homo sapiens GN=COASY PE=1 SV=4	38.8298	62.3	5.68107e+08	5.36619e+08	6.88052e+08	5.47335e+08	5.21983e+08	572988173	5.68591e+08	2.79974e+08	655326509
O75128	COBL	Protein cordon-bleu OS=Homo sapiens GN=COBL PE=1 SV=2	1.58604	135.5		334526	457446
Q53SF7	COBLL1	Cordon-bleu protein-like 1 OS=Homo sapiens GN=COBLL1 PE=1 SV=2	20.6811	131.7	7.89457e+07	1.00951e+08	6.25132e+07	1.98511e+07	3.44259e+07	7.38442e+07	5.96136e+07	1.69901e+07	6.18002e+07
Q8WTW3	COG1	Conserved oligomeric Golgi complex subunit 1 OS=Homo sapiens GN=COG1 PE=1 SV=1	18.5714	108.9	5.75344e+07	7.32492e+07	6.13613e+07	4.13377e+07	4.20985e+07	4.01185e+07	7.45423e+07	3.1097e+07	8.15207e+07
Q14746	COG2	Conserved oligomeric Golgi complex subunit 2 OS=Homo sapiens GN=COG2 PE=1 SV=1	39.8374	83.2	7.89241e+07	9.16853e+07	1.00681e+08	6.99782e+07	4.64392e+07	6.91482e+07	7.90557e+07	5.54634e+07	9.51663e+07
Q96JB2	COG3	Conserved oligomeric Golgi complex subunit 3 OS=Homo sapiens GN=COG3 PE=1 SV=3	32.4879	94	1.28703e+08	2.23067e+08	2.44276e+08	135610099	1.13806e+08	1.22198e+08	2.3723e+08	5.86654e+07	130073655
Q9H9E3	COG4	Conserved oligomeric Golgi complex subunit 4 OS=Homo sapiens GN=COG4 PE=1 SV=2	30.3185	89	46889701	8.45237e+07	1.02159e+08	5.06563e+07	50305263	5.42467e+07	7.14573e+07	4.2122e+07	6.55728e+07
Q9UP83	COG5	Conserved oligomeric Golgi complex subunit 5 OS=Homo sapiens GN=COG5 PE=1 SV=2	22.7652	92.7	4.69947e+07	3.04022e+07	9.69404e+07	1.19724e+08	7.67644e+07	9.98072e+07	5.11265e+07	4.8402e+07	1.23297e+08
Q9Y2V7	COG6	Conserved oligomeric Golgi complex subunit 6 OS=Homo sapiens GN=COG6 PE=2 SV=2	37.4429	73.2	45561850	7.2134e+07	2.81928e+08	5.52579e+07	5.38365e+07	8.10318e+07	8.22485e+07	5.3684e+07	7.95407e+07
P83436	COG7	Conserved oligomeric Golgi complex subunit 7 OS=Homo sapiens GN=COG7 PE=1 SV=1	35.0649	86.3	1.03933e+08	7.47853e+07	1.04196e+08	53863750	39594865	5.69313e+07	4.61013e+07	2.5909e+08	1.04202e+08
Q96MW5	COG8	Conserved oligomeric Golgi complex subunit 8 OS=Homo sapiens GN=COG8 PE=1 SV=2	26.1438	68.4	5.64428e+07	5.68627e+07	5.69881e+07	3.54719e+07	3.03208e+07	2.30437e+07	2.62632e+07	2.8575e+07	7.09377e+07
P38432	COIL	Coilin OS=Homo sapiens GN=COIL PE=1 SV=1	26.2153	62.6	1.94996e+08	1.90343e+08	2.88455e+08	1.75657e+08	1.55896e+08	2.05193e+08	1.91572e+08	8.16417e+07	2.16591e+08
P39060	COL18A1	Collagen alpha-1(XVIII) chain OS=Homo sapiens GN=COL18A1 PE=1 SV=5	15.9065	178.1	1.47068e+08	1.51188e+08	1.15539e+08	1.03556e+08	94840901	1.01682e+08	1.42852e+08	1.08956e+08	1.61939e+08
P12111	COL6A3	Collagen alpha-3(VI) chain OS=Homo sapiens GN=COL6A3 PE=1 SV=4	0.629525	343.5
Q14050	COL9A3	Collagen alpha-3(IX) chain OS=Homo sapiens GN=COL9A3 PE=2 SV=2	2.77778	63.6	81141190			1.20683e+08		123622172		4.77251e+07	1.93765e+07
Q8NBJ5	COLGALT1	Procollagen galactosyltransferase 1 OS=Homo sapiens GN=GLT25D1 PE=1 SV=1	56.5916	71.6	898462134	8.02731e+08	9.77167e+08	8.21668e+08	8.01511e+08	7.25109e+08	8.391e+08	4.41785e+08	8.70842e+08
Q8IYK4	COLGALT2	Procollagen galactosyltransferase 2 OS=Homo sapiens GN=GLT25D2 PE=1 SV=1	28.115	72.9	1.41328e+08	1.30276e+08	1.50536e+08	1.66506e+08	1.99889e+08	179112816	1.9424e+08	9.57025e+07	1.58548e+08
Q8N668	COMMD1	COMM domain-containing protein 1 OS=Homo sapiens GN=COMMD1 PE=1 SV=1	54.7368	21.2	7.43261e+07	8.66012e+07	8.25319e+07	6.20202e+07	3.87647e+07	7.25712e+07	5.56796e+07	2.45645e+07	62334771
Q9Y6G5	COMMD10	COMM domain-containing protein 10 OS=Homo sapiens GN=COMMD10 PE=1 SV=1	19.3069	23		1.84378e+07					1.02671e+07	1.00515e+07	9.426e+06
Q86X83	COMMD2	COMM domain-containing protein 2 OS=Homo sapiens GN=COMMD2 PE=1 SV=2	30.1508	22.7	8.63469e+06	7.35761e+07	7.61252e+07	7.04178e+07	27692604	77771849	30572921	2.34581e+07	3.63958e+07
Q9UBI1	COMMD3	COMM domain-containing protein 3 OS=Homo sapiens GN=COMMD3 PE=1 SV=1	27.1795	22.1	3.69542e+07	3.48871e+07	133728100	6.65296e+07	6.02602e+06	71216254	70296520	3.67388e+07	9.04108e+07
Q9H0A8	COMMD4	COMM domain-containing protein 4 OS=Homo sapiens GN=COMMD4 PE=1 SV=1	35.6784	21.8	7.84827e+07	4.8488e+07	40348160	25079679	6.48224e+07	36465317	2.37018e+07	1.80311e+07	1.32277e+08
Q9GZQ3	COMMD5	COMM domain-containing protein 5 OS=Homo sapiens GN=COMMD5 PE=1 SV=1	3.125	24.7
Q7Z4G1	COMMD6	COMM domain-containing protein 6 OS=Homo sapiens GN=COMMD6 PE=1 SV=1	28.2353	9.6		7.54708e+07	6.41732e+07				5.58815e+07	3.41255e+07
Q86VX2	COMMD7	COMM domain-containing protein 7 OS=Homo sapiens GN=COMMD7 PE=1 SV=2	17.5	22.5		1.99986e+07	2.86195e+07
Q9NX08	COMMD8	COMM domain-containing protein 8 OS=Homo sapiens GN=COMMD8 PE=1 SV=1	63.9344	21.1	1.04043e+08	9.87554e+07	1.02656e+08	1.1876e+08	1.04253e+08	1.13452e+08	1.00928e+08	4.15004e+07	8.8786e+07
Q9P000	COMMD9	COMM domain-containing protein 9 OS=Homo sapiens GN=COMMD9 PE=1 SV=2	36.3636	21.8	1.20149e+08	1.20988e+08	1.64414e+08	1.0932e+08	9.89706e+07	8.59327e+07	8.25983e+07	7.38905e+07	1.03863e+08
P21964	COMT	Catechol O-methyltransferase OS=Homo sapiens GN=COMT PE=1 SV=2	62.7306	30	1.32e+09	1.26886e+09	1.54715e+09	1.26021e+09	1.17493e+09	1.42449e+09	1.26864e+09	7.82353e+08	1.40463e+09
Q86VU5	COMTD1	Catechol O-methyltransferase domain-containing protein 1 OS=Homo sapiens GN=COMTD1 PE=1 SV=1	43.1298	28.8	2.20482e+08	2.71725e+08	3.16314e+08	3.01502e+08	2.16001e+08	2.41991e+08	2.56054e+08	1.01865e+08	2.65869e+08
P53621	COPA	Coatomer subunit alpha OS=Homo sapiens GN=COPA PE=1 SV=2	68.7908	138.3	1.67774e+09	1.65917e+09	1.94031e+09	1.49794e+09	1.44694e+09	1.72665e+09	1.55044e+09	9.77406e+08	1.82759e+09
P53618	COPB1	Coatomer subunit beta OS=Homo sapiens GN=COPB1 PE=1 SV=3	60.9654	107.1	1.63134e+09	1.46108e+09	1.70785e+09	1.19929e+09	1.18262e+09	1.22825e+09	1.37253e+09	9.08922e+08	1.59776e+09
P35606	COPB2	Coatomer subunit beta' OS=Homo sapiens GN=COPB2 PE=1 SV=2	56.4018	102.4	1604031028	1440619642	1.5895e+09	1197409263	1.15574e+09	1.28573e+09	1.48738e+09	1.08636e+09	1.33128e+09
O14579	COPE	Coatomer subunit epsilon OS=Homo sapiens GN=COPE PE=1 SV=3	70.4545	34.5	1.21845e+09	1.10894e+09	1.18053e+09	9.01224e+08	8.77021e+08	9.69146e+08	1165646566	6.38654e+08	1.1233e+09
Q9Y678	COPG1	Coatomer subunit gamma OS=Homo sapiens GN=COPG PE=1 SV=1	66.8192	97.7	1.28603e+09	1.18864e+09	1.40072e+09	1241153095	1.17848e+09	1201838403	1204590012	8.25659e+08	1.39872e+09
Q9UBF2	COPG2	Coatomer subunit gamma-2 OS=Homo sapiens GN=COPG2 PE=1 SV=1	34.9024	97.6	163191419	158479981	1.8367e+08	1.17096e+08	9.52236e+07	1.02195e+08	1.56339e+08	7.29196e+07	1.19812e+08
P61201	COPS2	COP9 signalosome complex subunit 2 OS=Homo sapiens GN=COPS2 PE=1 SV=1	39.9549	51.6	1.09368e+08	1.09424e+08	1.30417e+08	1.23782e+08	1.02333e+08	1.13381e+08	1.30012e+08	1.15659e+08	1.51913e+08
Q9UNS2	COPS3	COP9 signalosome complex subunit 3 OS=Homo sapiens GN=COPS3 PE=1 SV=3	38.7707	47.8	1.91774e+08	1.79252e+08	2.1112e+08	2.09065e+08	1.95072e+08	2.15331e+08	2.21492e+08	2.76484e+08	2.50361e+08
Q9BT78	COPS4	COP9 signalosome complex subunit 4 OS=Homo sapiens GN=COPS4 PE=1 SV=1	56.1576	46.2	157586010	1.59616e+08	1.88676e+08	1.70257e+08	159396794	153573211	2.21654e+08	8.87779e+07	1.84636e+08
Q92905	COPS5	COP9 signalosome complex subunit 5 OS=Homo sapiens GN=COPS5 PE=1 SV=4	54.1916	37.6	1.1959e+08	1.44555e+08	1.53692e+08	1.21321e+08	1.05105e+08	1.41099e+08	1.5327e+08	6.15195e+07	1.67783e+08
Q7L5N1	COPS6	COP9 signalosome complex subunit 6 OS=Homo sapiens GN=COPS6 PE=1 SV=1	43.4251	36.1	1.74866e+08	163818093	187429008	1.78214e+08	1.64303e+08	1.6654e+08	1.65783e+08	9.40669e+07	2.15069e+08
Q9UBW8	COPS7A	COP9 signalosome complex subunit 7a OS=Homo sapiens GN=COPS7A PE=1 SV=1	33.0909	30.3	5.41901e+07	4.33939e+07	5.17124e+07	3.18074e+07	2.82739e+07	2.57687e+07	4.76305e+07	2.40008e+07	3.88929e+07
Q9H9Q2	COPS7B	COP9 signalosome complex subunit 7b OS=Homo sapiens GN=COPS7B PE=1 SV=1	34.4697	29.6	5.133e+07	6.87134e+07	6.88855e+07	6.58148e+07	5.7995e+07	6.10013e+07	4.34125e+07	3.29389e+07	9.61064e+07
Q99627	COPS8	COP9 signalosome complex subunit 8 OS=Homo sapiens GN=COPS8 PE=1 SV=1	48.8038	23.2	2.27432e+08	220732237	2.57747e+08	2.20779e+08	1.99423e+08	237026938	2.16776e+08	1.52691e+08	2.25064e+08
Q8WXC6	COPS9	Myeloma-overexpressed gene 2 protein OS=Homo sapiens GN=MYEOV2 PE=2 SV=3	35.0877	6.2	45306286	5.03547e+07	6.05619e+07	70418793	49019043	47633683	46815748	2.01848e+07	4.11319e+07
P61923	COPZ1	Coatomer subunit zeta-1 OS=Homo sapiens GN=COPZ1 PE=1 SV=1	39.548	20.2	1.19528e+09	1.06031e+09	1.28172e+09	1.17083e+09	9.87818e+08	1.0262e+09	1228234735	7.39179e+08	1195359484
Q9H8M1	COQ10B	Coenzyme Q-binding protein COQ10 homolog B, mitochondrial OS=Homo sapiens GN=COQ10B PE=2 SV=1	11.7647	27.1					1.4524e+07		1.4967e+07
Q9NZJ6	COQ3	Hexaprenyldihydroxybenzoate methyltransferase, mitochondrial OS=Homo sapiens GN=COQ3 PE=1 SV=2	28.1843	41	1.17047e+08	3.55559e+07	1.12948e+08	5.1101e+07	7.26584e+07	2.46175e+08	8.42582e+07	7.19939e+07	8.30312e+07
Q5HYK3	COQ5	Ubiquinone biosynthesis methyltransferase COQ5, mitochondrial OS=Homo sapiens GN=COQ5 PE=1 SV=2	47.0948	37.1	1.41851e+08	2.09531e+08	2.74887e+08	2.34927e+08	2.25333e+08	2.21351e+08	1.96853e+08	1.19345e+08	2.00392e+08
Q9Y2Z9	COQ6	Ubiquinone biosynthesis monooxygenase COQ6 OS=Homo sapiens GN=COQ6 PE=1 SV=2	48.5043	50.8	1.28897e+08	1.49661e+08	1.05079e+08	1.00788e+08	1.13071e+08	1.54748e+08	1.48746e+08	6.28815e+07	1.14997e+08
Q99807	COQ7	Ubiquinone biosynthesis protein COQ7 homolog OS=Homo sapiens GN=COQ7 PE=1 SV=2	35.023	24.3	1.52243e+08	1.08918e+08	1.56096e+08	1.14791e+08	8.59094e+07	9.76112e+07	103257170	50525960	55697100
Q8NI60	COQ8A	Chaperone activity of bc1 complex-like, mitochondrial OS=Homo sapiens GN=CABC1 PE=1 SV=1	42.0402	71.9	4.31672e+08	4.31385e+08	4.56257e+08	4.15329e+08	3.70441e+08	3.99974e+08	386106227	2.22859e+08	4.07039e+08
Q96D53	COQ8B	Uncharacterized aarF domain-containing protein kinase 4 OS=Homo sapiens GN=ADCK4 PE=1 SV=2	28.8603	60	8.07019e+07	9.79057e+07	8.48281e+07		3.0149e+07	2.83655e+07	5.64429e+07	3.35124e+07
O75208	COQ9	Ubiquinone biosynthesis protein COQ9, mitochondrial OS=Homo sapiens GN=COQ9 PE=1 SV=1	54.4025	35.5	2.7903e+08	2.65575e+08	2.61449e+08	3.00093e+08	2.90346e+08	3.01759e+08	2.78053e+08	1.34006e+08	2.37697e+08
P31146	CORO1A	Coronin-1A OS=Homo sapiens GN=CORO1A PE=1 SV=4	31.6703	51	1.61865e+08	1.54248e+08	1.72736e+08	1.50576e+08	1.43959e+08	1.48398e+08	1.77654e+08	1.23999e+08	1.4882e+08
Q9BR76	CORO1B	Coronin-1B OS=Homo sapiens GN=CORO1B PE=1 SV=1	33.1288	54.2	3.89899e+08	3.35956e+08	3.92688e+08	2.52021e+08	2.0831e+08	2.29341e+08	3.72095e+08	2.64954e+08	3.54134e+08
Q9ULV4	CORO1C	Coronin-1C OS=Homo sapiens GN=CORO1C PE=1 SV=1	44.9367	53.2	1.14538e+09	991890831	1.3276e+09	1.40981e+09	1.29636e+09	1.1295e+09	1.23322e+09	6.58469e+08	1.19407e+09
Q92828	CORO2A	Coronin-2A OS=Homo sapiens GN=CORO2A PE=2 SV=2	19.2381	59.7	4.16047e+07	4.41452e+07	5.2653e+07	1.71864e+07	4.60822e+07	4.47414e+07	9.02842e+08	3.46638e+07	8.12091e+08
P57737	CORO7	Coronin-7 OS=Homo sapiens GN=CORO7 PE=1 SV=2	25.4054	100.5	5.27524e+07	55751733	129624977	5.2924e+07	6.27426e+07	7.01286e+07	7.53147e+07	5.01575e+07	7.3532e+07
Q14019	COTL1	Coactosin-like protein OS=Homo sapiens GN=COTL1 PE=1 SV=3	11.2676	15.9
Q12887	COX10	Protoheme IX farnesyltransferase, mitochondrial OS=Homo sapiens GN=COX10 PE=1 SV=2	4.28894	48.9
Q9Y6N1	COX11	Cytochrome c oxidase assembly protein COX11, mitochondrial OS=Homo sapiens GN=COX11 PE=1 SV=3	33.3333	31.4	1.6914e+08	7.03253e+07	7.21836e+07	2.15473e+08	1.84466e+08	2.17207e+08		1.08587e+08
Q96I36	COX14	Uncharacterized protein C12orf62 OS=Homo sapiens GN=C12orf62 PE=2 SV=1	35.0877	6.6	82317016		1.4223e+08	1.0963e+08	8.49191e+07	8.19068e+07	9.98426e+07		1.51653e+08
Q7KZN9	COX15	Cytochrome c oxidase assembly protein COX15 homolog OS=Homo sapiens GN=COX15 PE=1 SV=1	25.122	46	4.93567e+08	5.96524e+08	6.39627e+08	503573699	4.8565e+08	516515492	4.51628e+08	2.53718e+08	4.92348e+08
Q9P0S2	COX16	Cytochrome c oxidase assembly protein COX16 homolog, mitochondrial OS=Homo sapiens GN=COX16 PE=2 SV=1	13.2075	12.3									45848766
Q14061	COX17	Cytochrome c oxidase copper chaperone OS=Homo sapiens GN=COX17 PE=1 SV=2	46.0317	6.9	366876217	398183912	465198067	1.50262e+08	1.63244e+08	1.43781e+08	344296875	2.04265e+08	1.52795e+08
Q8N8Q8	COX18	Mitochondrial inner membrane protein COX18 OS=Homo sapiens GN=COX18 PE=2 SV=1	5.40541	37							1.32303e+07
Q49B96	COX19	Cytochrome c oxidase assembly protein COX19 OS=Homo sapiens GN=COX19 PE=1 SV=1	34.4444	10.4	52695132		8.10738e+07	1.33244e+08	111013159	9.04633e+07	1.62938e+07	6.18711e+07	5.76911e+07
Q5RI15	COX20	Protein FAM36A OS=Homo sapiens GN=FAM36A PE=1 SV=2	33.8983	13.3	9.04313e+08	889853101	9.78599e+08	8.79398e+08	8.33394e+08	8.7484e+08	8.28954e+08	5.77528e+08	7.69633e+08
P13073	COX4I1	Cytochrome c oxidase subunit 4 isoform 1, mitochondrial OS=Homo sapiens GN=COX4I1 PE=1 SV=1	48.5207	19.6	3.11647e+09	3.77471e+09	3.73041e+09	3.46888e+09	3.54943e+09	3.58539e+09	3.37771e+09	2.78195e+09	3100901668
P20674	COX5A	Cytochrome c oxidase subunit 5A, mitochondrial OS=Homo sapiens GN=COX5A PE=1 SV=2	52.6667	16.8	3.36109e+09	3328067424	2.80378e+09	3.18704e+09	3.33084e+09	3.4453e+09	3.03579e+09	2.28009e+09	2.95528e+09
P10606	COX5B	Cytochrome c oxidase subunit 5B, mitochondrial OS=Homo sapiens GN=COX5B PE=1 SV=2	55.814	13.7	2.92092e+09	3.29142e+09	3.14309e+09	3.49874e+09	3.23963e+09	3.37549e+09	2878666384	1.97993e+09	3.08522e+09
P12074	COX6A1	Cytochrome c oxidase subunit 6A1, mitochondrial OS=Homo sapiens GN=COX6A1 PE=1 SV=4	43.1193	12.1	2.25336e+09	2.42316e+09	2.58957e+09	1407373820	1.61772e+09	1415896772	8.81365e+08		1650089324
P14854	COX6B1	Cytochrome c oxidase subunit 6B1 OS=Homo sapiens GN=COX6B1 PE=1 SV=2	66.2791	10.2	1.89563e+09	1.85455e+09	2015169440	1.68726e+09	1.81706e+09	1.82415e+09	1.74098e+09	1.2625e+09	1.75502e+09
Q6YFQ2	COX6B2	Cytochrome c oxidase subunit 6B2 OS=Homo sapiens GN=COX6B2 PE=2 SV=1	10.2273	10.5						9.6803e+07		9.56615e+07
P09669	COX6C	Cytochrome c oxidase subunit 6C OS=Homo sapiens GN=COX6C PE=1 SV=2	49.3333	8.8	4.69049e+08	5.04313e+08	7.46811e+07	9.30587e+08	9.96659e+08	8.92026e+08	6.16807e+08	6.5976e+08	4.62827e+08
P14406	COX7A2	Cytochrome c oxidase subunit 7A2, mitochondrial OS=Homo sapiens GN=COX7A2 PE=1 SV=1	27.7108	9.4	1685720230	1578081528	3.21546e+09				2.57989e+09	9.37241e+08	2.44301e+09
O14548	COX7A2L	Cytochrome c oxidase subunit 7A-related protein, mitochondrial OS=Homo sapiens GN=COX7A2L PE=1 SV=2	56.1404	12.6	7.72868e+08	8.27707e+08	9.68724e+08	6.86409e+08	6.9789e+08	7.63258e+08	6.93637e+08	4.42139e+08	7.29841e+08
P24311	COX7B	Cytochrome c oxidase subunit 7B, mitochondrial OS=Homo sapiens GN=COX7B PE=1 SV=2	8.75	9.2				1.43643e+08	1.47462e+08	118481430	1.14613e+08	8.641e+07	81064994
P15954	COX7C	Cytochrome c oxidase subunit 7C, mitochondrial OS=Homo sapiens GN=COX7C PE=1 SV=1	28.5714	7.2	1672926845		1576018628	1885565432	8.56228e+08	902315022	7.40386e+08	4.68008e+08	1.56387e+09
P10176	COX8A	Cytochrome c oxidase subunit 8A, mitochondrial OS=Homo sapiens GN=COX8A PE=1 SV=2	13.0435	7.6
P00450	CP	Ceruloplasmin OS=Homo sapiens GN=CP PE=1 SV=1	6.29108	122.1	1.38406e+07	2.5677e+07	2.05458e+07		4.1027e+06	14139598	14933005
P15085	CPA1	Carboxypeptidase A1 OS=Homo sapiens GN=CPA1 PE=1 SV=2	1.90931	47.1									1.1793e+07
Q96IY4	CPB2	Carboxypeptidase B2 OS=Homo sapiens GN=CPB2 PE=1 SV=1	1.65485	48.4							23831024
O75976	CPD	Carboxypeptidase D OS=Homo sapiens GN=CPD PE=1 SV=2	42.1014	152.8	3.1125e+08	3.40425e+08	3.98704e+08	359440030	3.95294e+08	3.71941e+08	3.11265e+08	2.17527e+08	3.79311e+08
P16870	CPE	Carboxypeptidase E OS=Homo sapiens GN=CPE PE=1 SV=1	21.6387	53.1	2.95871e+07	4.18645e+07	6.34372e+07	1.92629e+07	2.83747e+07	5.17496e+07	3.92203e+07	3.17417e+07	3.75626e+07
Q17RY0	CPEB4	Cytoplasmic polyadenylation element-binding protein 4 OS=Homo sapiens GN=CPEB4 PE=1 SV=1	4.93827	80.1
O14810	CPLX1	Complexin-1 OS=Homo sapiens GN=CPLX1 PE=1 SV=1	14.9254	15		1.70036e+07
Q6PUV4	CPLX2	Complexin-2 OS=Homo sapiens GN=CPLX2 PE=1 SV=2	48.5075	15.4	5.75355e+08	5.77191e+08	5.95411e+08	5.88e+08	3.6314e+08	5.9845e+08	4.84677e+08	1.95027e+08	4.67803e+08
P22792	CPN2	Carboxypeptidase N subunit 2 OS=Homo sapiens GN=CPN2 PE=1 SV=2	4.40367	60.6	2.09438e+07	1.6942e+07	47435055	3.43635e+07	22842099	30280834	2.61876e+07	1.39691e+07	33460048
Q99829	CPNE1	Copine-1 OS=Homo sapiens GN=CPNE1 PE=1 SV=1	48.6034	59	8.99369e+08	8.7796e+08	1.17537e+09	1.11538e+09	1.08991e+09	1.47965e+09	9.96794e+08	7.49182e+08	1.10815e+09
Q96FN4	CPNE2	Copine-2 OS=Homo sapiens GN=CPNE2 PE=1 SV=3	3.10219	61.2							63083724
O75131	CPNE3	Copine-3 OS=Homo sapiens GN=CPNE3 PE=1 SV=1	44.1341	60.1	3.41723e+08	3.93254e+08	4.12793e+08	5.65914e+08	6.83422e+08	7.29383e+08	2.61811e+08	1.82219e+08	380241802
P36551	CPOX	Coproporphyrinogen-III oxidase, mitochondrial OS=Homo sapiens GN=CPOX PE=1 SV=3	55.7269	50.1	4.20533e+08	449407760	6.66315e+08	3.83521e+08	3.56251e+08	4.1595e+08	4.81089e+08	2.49057e+08	4.63255e+08
Q9BRF8	CPPED1	Calcineurin-like phosphoesterase domain-containing protein 1 OS=Homo sapiens GN=CPPED1 PE=1 SV=2	57.0064	35.6	704973542	5.75224e+08	3.91912e+08	5.01577e+08	4.40485e+08	3.59266e+08	7.59978e+08	5.43242e+08	5.13972e+08
Q9Y646	CPQ	Plasma glutamate carboxypeptidase OS=Homo sapiens GN=PGCP PE=1 SV=1	13.5593	51.9		1.61163e+07						1.78648e+07	1.47795e+07
P31327	CPS1	Carbamoyl-phosphate synthase [ammonia], mitochondrial OS=Homo sapiens GN=CPS1 PE=1 SV=2	29.5333	164.8	8.65843e+07	1.05353e+08	1.09817e+08	1.06916e+08	5.27207e+07	1.06913e+08	6.82859e+07	5.8017e+07	9.07882e+07
Q10570	CPSF1	Cleavage and polyadenylation specificity factor subunit 1 OS=Homo sapiens GN=CPSF1 PE=1 SV=2	34.9272	160.8	2.79314e+08	2.81773e+08	6.63422e+08	2.5234e+08	2.32908e+08	2.52616e+08	3.17992e+08	1.90388e+08	3.1725e+08
Q9P2I0	CPSF2	Cleavage and polyadenylation specificity factor subunit 2 OS=Homo sapiens GN=CPSF2 PE=1 SV=2	42.5831	88.4	1.24786e+09	1.26283e+09	1.93865e+08	1.85599e+08	1.4552e+08	1.61762e+08	1.60065e+08	1.26498e+08	1.82374e+08
Q9UKF6	CPSF3	Cleavage and polyadenylation specificity factor subunit 3 OS=Homo sapiens GN=CPSF3 PE=1 SV=1	49.5614	77.4	2.57351e+08	2.65616e+08	2.63499e+08	2.44372e+08	1.89606e+08	2.76091e+08	2.61444e+08	1.87507e+08	2.64672e+08
O95639	CPSF4	Cleavage and polyadenylation specificity factor subunit 4 OS=Homo sapiens GN=CPSF4 PE=1 SV=1	36.803	30.2		6.13426e+07	2.01088e+08	2.06957e+08	2.00145e+08	1.20393e+08	1.41704e+08	9.67774e+07	2.29268e+08
Q16630	CPSF6	Cleavage and polyadenylation specificity factor subunit 6 OS=Homo sapiens GN=CPSF6 PE=1 SV=2	23.9564	59.2	6.66473e+08	6.23979e+08	9.00579e+08	6.42207e+08	7.6889e+08	598676398	6.665e+08	3.72042e+08	6.7333e+08
Q8N684	CPSF7	Cleavage and polyadenylation specificity factor subunit 7 OS=Homo sapiens GN=CPSF7 PE=1 SV=1	26.327	52	3.97665e+08	4.00628e+08	4.57335e+08	2.85276e+08	3.10667e+08	3.32892e+08	3.2855e+08	2.59148e+08	365008271
P50416	CPT1A	Carnitine O-palmitoyltransferase 1, liver isoform OS=Homo sapiens GN=CPT1A PE=1 SV=2	39.8448	88.3	6.49601e+08	6.70142e+08	7.95245e+08	661610595	6.45402e+08	6.80123e+08	5.54594e+08	3.4889e+08	5.27759e+08
Q92523	CPT1B	Carnitine O-palmitoyltransferase 1, muscle isoform OS=Homo sapiens GN=CPT1B PE=2 SV=2	2.46114	87.7
P23786	CPT2	Carnitine O-palmitoyltransferase 2, mitochondrial OS=Homo sapiens GN=CPT2 PE=1 SV=2	44.8328	73.7	2.97784e+08	2.7474e+08	3.04431e+08	2.77956e+08	2.60897e+08	2.85792e+08	2.73464e+08	1.94061e+08	234882001
Q5TA50	CPTP	Glycolipid transfer protein domain-containing protein 1 OS=Homo sapiens GN=GLTPD1 PE=1 SV=1	23.3645	24.4					1.21831e+07	1.27702e+07	1.68756e+07
Q9H3G5	CPVL	Probable serine carboxypeptidase CPVL OS=Homo sapiens GN=CPVL PE=1 SV=2	44.3277	54.1	8.50036e+08	8.31744e+08	912516238	7.40979e+08	6.94105e+08	746990533	6.28701e+08	3.96334e+08	7.13944e+08
P78560	CRADD	Death domain-containing protein CRADD OS=Homo sapiens GN=CRADD PE=1 SV=1	24.1206	22.7	18439966		2.09961e+07	6.19228e+06	1.38515e+07		3.29819e+07	8.70651e+06	1.64167e+07
P43155	CRAT	Carnitine O-acetyltransferase OS=Homo sapiens GN=CRAT PE=1 SV=5	31.1502	70.8	4.96439e+08	4.31921e+08	4.48752e+08	4.08385e+08	3.96773e+08	4.73201e+08	4.00229e+08	2.27882e+08	5.20116e+08
O75575	CRCP	DNA-directed RNA polymerase III subunit RPC9 OS=Homo sapiens GN=CRCP PE=1 SV=1	47.2973	16.9	1.43783e+07	2.91486e+07	3.6039e+07	4.33984e+07	3.5123e+07	6.08448e+07	6.72623e+07	1.69702e+07	3.81148e+07
P16220	CREB1	Cyclic AMP-responsive element-binding protein 1 OS=Homo sapiens GN=CREB1 PE=1 SV=2	14.956	36.7	1.84812e+08	1.68865e+08	1.03238e+08	185389594	137638393	170276538	2.44182e+08	1.02453e+08
Q92793	CREBBP	CREB-binding protein OS=Homo sapiens GN=CREBBP PE=1 SV=3	6.92056	265.2			2.94452e+06
Q9NS37	CREBZF	CREB/ATF bZIP transcription factor OS=Homo sapiens GN=CREBZF PE=1 SV=2	1.9774	37.1	455887588	508141716	321630248	399461090					476968304
O75629	CREG1	Protein CREG1 OS=Homo sapiens GN=CREG1 PE=1 SV=1	12.7273	24.1	1.32918e+07	5.20188e+06	6.75621e+07	1.79087e+08	1.39611e+08	1.97124e+08	3.9483e+08	95360220	4.21124e+08
Q96HD1	CRELD1	Cysteine-rich with EGF-like domain protein 1 OS=Homo sapiens GN=CRELD1 PE=1 SV=3	28.5714	45.4	1.33966e+08	8.87487e+07	1.55189e+07	9.12961e+07	8.79581e+07	77630644	8.83674e+07	52454101	1.14724e+08
Q6UXH1	CRELD2	Cysteine-rich with EGF-like domain protein 2 OS=Homo sapiens GN=CRELD2 PE=1 SV=1	19.2635	38.2	1.37178e+08	1.13849e+08	1.7383e+08	1.30021e+08	1.28541e+08	1.36546e+08	7.09188e+07	5.94561e+07	7.46541e+07
Q03060	CREM	cAMP-responsive element modulator OS=Homo sapiens GN=CREM PE=1 SV=5	8.58726	38.9	40602449	2.48672e+07	5.28192e+07	56089575	4.38312e+07	41749827		3.58603e+07	6.17325e+07
Q9NZV1	CRIM1	Cysteine-rich motor neuron 1 protein OS=Homo sapiens GN=CRIM1 PE=1 SV=1	2.89575	113.7
P50238	CRIP1	Cysteine-rich protein 1 OS=Homo sapiens GN=CRIP1 PE=1 SV=3	46.7532	8.5	1045341098	974967566	1.13355e+09	355194359	746683211	4.4257e+08	1130194914	2.89181e+08	7.73935e+08
P52943	CRIP2	Cysteine-rich protein 2 OS=Homo sapiens GN=CRIP2 PE=1 SV=1	45.6731	22.5	9.66195e+07	1.12816e+08	1.12239e+08	107007756	9.04098e+07	1.26858e+08	1.85667e+08	1.03056e+08	1.40579e+08
Q9P021	CRIPT	Cysteine-rich PDZ-binding protein OS=Homo sapiens GN=CRIPT PE=1 SV=1	10.8911	11.2	59429916	5.34972e+07	64575302		49469611	27682963
P46108	CRK	Adapter molecule crk OS=Homo sapiens GN=CRK PE=1 SV=2	41.1184	33.8	1.01743e+08	5.56219e+07	4.53015e+07	144316927	8.73908e+07	1.02859e+08	1.58061e+08	8.12851e+07	1.3881e+08
P46109	CRKL	Crk-like protein OS=Homo sapiens GN=CRKL PE=1 SV=1	55.7756	33.8	3.71888e+08	3.77712e+08	5.34396e+08	3.05739e+08	2.79647e+08	3.24946e+08	4.00085e+08	2.60523e+08	3.50835e+08
O75462	CRLF1	Cytokine receptor-like factor 1 OS=Homo sapiens GN=CRLF1 PE=1 SV=1	26.5403	46.3	8.2978e+07	7.93682e+07	9.79784e+07	1.02959e+08	7.58814e+07	1.20153e+08	7.79648e+07	4.59674e+07	8.52719e+07
Q8IUI8	CRLF3	Cytokine receptor-like factor 3 OS=Homo sapiens GN=CRLF3 PE=1 SV=2	3.16742	49.7
Q9UJA2	CRLS1	Cardiolipin synthase OS=Homo sapiens GN=CRLS1 PE=2 SV=1	3.32226	32.6	2.79447e+07		32531713		1.6409e+07
Q9BZJ0	CRNKL1	Crooked neck-like protein 1 OS=Homo sapiens GN=CRNKL1 PE=1 SV=4	29.0094	100.4	3.5455e+08	3.49639e+08	4.04474e+08	3.19628e+08	2.64567e+08	298033136	3.1048e+08	1.7976e+08	2.84857e+08
Q9UKG9	CROT	Peroxisomal carnitine O-octanoyltransferase OS=Homo sapiens GN=CROT PE=1 SV=2	27.9412	70.1	8.27837e+07	9.18007e+07	1.04949e+08	1.30589e+08	1.04076e+08	6.20471e+07	1.15384e+08	5.01971e+07	9.97167e+07
O75718	CRTAP	Cartilage-associated protein OS=Homo sapiens GN=CRTAP PE=1 SV=1	36.1596	46.5	1.91662e+08	2.35555e+08	258520259	2.00502e+08	1.73416e+08	1.95216e+08	2.4132e+08	1.29927e+08	2.15543e+08
P02489	CRYAA	Alpha-crystallin A chain OS=Homo sapiens GN=CRYAA PE=1 SV=2	4.62428	19.9
Q9Y4K1	CRYBG1	Absent in melanoma 1 protein OS=Homo sapiens GN=AIM1 PE=1 SV=3	5.28149	188.6	1.53694e+07	1.21261e+07	2.53726e+07			1.44318e+07	15699637	9.74158e+06	16264246
Q8N1P7	CRYBG2	Absent in melanoma 1-like protein OS=Homo sapiens GN=AIM1L PE=2 SV=1	1.2987	68.6
Q9Y2S2	CRYL1	Lambda-crystallin homolog OS=Homo sapiens GN=CRYL1 PE=1 SV=3	27.8997	35.4	9.0208e+07	8.66544e+07	8.53762e+07	6.49875e+07	8.38188e+07	9.45541e+07		4.30954e+07	59315914
Q14894	CRYM	Mu-crystallin homolog OS=Homo sapiens GN=CRYM PE=1 SV=1	6.6879	33.8
Q08257	CRYZ	Quinone oxidoreductase OS=Homo sapiens GN=CRYZ PE=1 SV=1	76.2918	35.2	2.82368e+09	2.6359e+09	3.16734e+09	2.48616e+09	2.45414e+09	2747001800	2.68558e+09	1.75354e+09	2.78749e+09
O95825	CRYZL1	Quinone oxidoreductase-like protein 1 OS=Homo sapiens GN=CRYZL1 PE=1 SV=2	11.7479	38.7			4.31705e+07				14223992	19007417
O75390	CS	Citrate synthase, mitochondrial OS=Homo sapiens GN=CS PE=1 SV=2	59.0129	51.7	3.95748e+09	3824868640	4199721123	4.28406e+09	3.97292e+09	4.20963e+09	3.92093e+09	2.54974e+09	3971141910
O75534	CSDE1	Cold shock domain-containing protein E1 OS=Homo sapiens GN=CSDE1 PE=1 SV=2	42.3559	88.8	281835232	3.01687e+08	2.40061e+08	340912176	3.0766e+08	2.98105e+08	4.73133e+08	1.84078e+08	3.4972e+08
P55060	CSE1L	Exportin-2 OS=Homo sapiens GN=CSE1L PE=1 SV=3	57.3635	110.3	8.68983e+08	8.72722e+08	9.11106e+08	1.02178e+09	9.43956e+08	1.00845e+09	9.58665e+08	6.23675e+08	1.05734e+09
Q8N6G5	CSGALNACT2	Chondroitin sulfate N-acetylgalactosaminyltransferase 2 OS=Homo sapiens GN=CSGALNACT2 PE=2 SV=1	13.2841	62.5			17766180			31913229
P41240	CSK	Tyrosine-protein kinase CSK OS=Homo sapiens GN=CSK PE=1 SV=1	39.1111	50.7	8.28399e+07	3.6474e+07	7.25364e+07	1.22259e+08	1.22424e+08	180880682	6.69495e+07	1.14267e+08	118784224
P48729	CSNK1A1	Casein kinase I isoform alpha OS=Homo sapiens GN=CSNK1A1 PE=1 SV=2	36.2018	38.9	2.44088e+08	2.44024e+08	2.50786e+08	1.9805e+08	1.8985e+08	1.84687e+08	2.43099e+08	1.76347e+08	2.4467e+08
P49674	CSNK1E	Casein kinase I isoform epsilon OS=Homo sapiens GN=CSNK1E PE=1 SV=1	12.0192	47.3	9.31151e+07	5.69168e+07	9.49274e+07	9.15222e+07	9.9558e+07	5.21525e+07	9.64686e+07		4.80604e+07
P78368	CSNK1G2	Casein kinase I isoform gamma-2 OS=Homo sapiens GN=CSNK1G2 PE=1 SV=1	26.2651	47.4
Q9Y6M4	CSNK1G3	Casein kinase I isoform gamma-3 OS=Homo sapiens GN=CSNK1G3 PE=1 SV=2	12.9754	51.4
P68400	CSNK2A1	Casein kinase II subunit alpha OS=Homo sapiens GN=CSNK2A1 PE=1 SV=1	58.8235	45.1	7.35199e+08	8.25604e+08	9.58617e+08	9.16192e+08	8.73094e+08	9.44613e+08	9.71338e+08	5.8271e+08	9.64513e+08
P19784	CSNK2A2	Casein kinase II subunit alpha' OS=Homo sapiens GN=CSNK2A2 PE=1 SV=1	56.5714	41.2	4.20541e+08	427569670	4.36432e+08	4.01935e+08	3.8703e+08	4.4836e+08	4.26296e+08	2.88643e+08	4.59904e+08
P67870	CSNK2B	Casein kinase II subunit beta OS=Homo sapiens GN=CSNK2B PE=1 SV=1	53.0233	24.9	8.83224e+08	8.47251e+08	9.84116e+08	8.5585e+08	8.70784e+08	8.96384e+08	9.128e+08	6.88786e+08	980847540
P21291	CSRP1	Cysteine and glycine-rich protein 1 OS=Homo sapiens GN=CSRP1 PE=1 SV=3	51.8135	20.6	1.88266e+08	2.1227e+08	1.62209e+08	1.87757e+08	1.94378e+08	1.36201e+08	189990174	1.063e+08	198503883
P01034	CST3	Cystatin-C OS=Homo sapiens GN=CST3 PE=1 SV=1	48.6301	15.8	7.06081e+08	6.86219e+08	5.43838e+08	483231768	7.02279e+08	7.42242e+08	6.60364e+08	3.38069e+08	5.76569e+08
P28325	CST5	Cystatin-D OS=Homo sapiens GN=CST5 PE=1 SV=1	4.92958	16.1			52705925	2.66361e+07	5.03203e+07	43693925		2.62189e+07
P01040	CSTA	Cystatin-A OS=Homo sapiens GN=CSTA PE=1 SV=1	18.3673	11				2.11238e+07	2.91457e+07				3.16777e+07
P04080	CSTB	Cystatin-B OS=Homo sapiens GN=CSTB PE=1 SV=2	70.4082	11.1	8.82159e+08	1.05407e+09	1.04867e+09	5.91164e+08	1.01744e+09	5.93002e+08	1.19827e+09	6.8941e+08	1.03262e+09
Q05048	CSTF1	Cleavage stimulation factor subunit 1 OS=Homo sapiens GN=CSTF1 PE=1 SV=1	47.3318	48.3	252135633	2.91992e+08	4.07955e+08	2.4671e+08	3.06104e+08	306884102	2.62645e+08	4.36322e+08	4.09004e+08
P33240	CSTF2	Cleavage stimulation factor subunit 2 OS=Homo sapiens GN=CSTF2 PE=1 SV=1	37.435	60.9	2.1031e+08	2.21785e+08	2.88159e+08	2.41485e+08	2.20451e+08	2.36087e+08	2.39616e+08	1.51372e+08	2.68586e+08
Q9H0L4	CSTF2T	Cleavage stimulation factor subunit 2 tau variant OS=Homo sapiens GN=CSTF2T PE=1 SV=1	20.4545	64.4	6.94861e+07	9.83046e+07	1.03163e+08	4.40253e+07	3.50565e+07	3.95553e+07	3.42608e+07	3.52787e+07	7.66698e+07
Q12996	CSTF3	Cleavage stimulation factor subunit 3 OS=Homo sapiens GN=CSTF3 PE=1 SV=1	48.1172	82.9	3.54687e+08	3.64954e+08	4.13292e+08	3.14603e+08	2.98879e+08	3.26038e+08	3.59692e+08	2.20775e+08	4.15444e+08
Q13363	CTBP1	C-terminal-binding protein 1 OS=Homo sapiens GN=CTBP1 PE=1 SV=2	43.8636	47.5	4.77415e+08	5.41072e+08	567990935	4.95296e+08	4.12566e+08	4.62289e+08	5.49771e+08	3.59577e+08	5.86817e+08
Q01459	CTBS	Di-N-acetylchitobiase OS=Homo sapiens GN=CTBS PE=1 SV=1	10.1299	43.7	2.44959e+07							1.35743e+07
Q2NKJ3	CTC1	Uncharacterized protein C17orf68 OS=Homo sapiens GN=C17orf68 PE=2 SV=1	1.39688	134.5
P49711	CTCF	Transcriptional repressor CTCF OS=Homo sapiens GN=CTCF PE=1 SV=1	14.4429	82.7	1.34293e+08	1.41792e+08	2.16657e+08	1.26201e+08	1.51401e+08	67314876	1.7053e+08	9.5856e+07	1.12646e+08
O95476	CTDNEP1	Serine/threonine-protein phosphatase dullard OS=Homo sapiens GN=DULLARD PE=1 SV=2	13.9344	28.4		5.82742e+07		7.72333e+07	66827111		5.05748e+07	39279682
Q9Y5B0	CTDP1	RNA polymerase II subunit A C-terminal domain phosphatase OS=Homo sapiens GN=CTDP1 PE=1 SV=2	5.61915	104.2					195823866	191486898			2.3456e+08
Q9GZU7	CTDSP1	Carboxy-terminal domain RNA polymerase II polypeptide A small phosphatase 1 OS=Homo sapiens GN=CTDSP1 PE=1 SV=1	11.8774	29.2	1.20221e+08	102713716			83547878		4.22227e+07	6.86021e+07	4.74327e+07
O15194	CTDSPL	CTD small phosphatase-like protein OS=Homo sapiens GN=CTDSPL PE=1 SV=2	7.6087	31.1						5.40184e+06
Q05D32	CTDSPL2	CTD small phosphatase-like protein 2 OS=Homo sapiens GN=CTDSPL2 PE=1 SV=2	8.15451	53	51452673			38254610	4.5799e+07	4.45384e+07			56456756
P32929	CTH	Cystathionine gamma-lyase OS=Homo sapiens GN=CTH PE=1 SV=3	19.0123	44.5	3.46605e+07	4.17143e+07	4.29396e+07	7.68595e+07	6.92291e+07	8.14549e+07	7.64016e+07	5.78994e+07	8.17731e+07
Q96CG8	CTHRC1	Collagen triple helix repeat-containing protein 1 OS=Homo sapiens GN=CTHRC1 PE=1 SV=1	4.93827	26.2					29216094	47357784	1.81107e+07
O43310	CTIF	CBP80/20-dependent translation initiation factor OS=Homo sapiens GN=KIAA0427 PE=1 SV=1	3.01003	67.5		9.5026e+06	1.10765e+07					3.09488e+06
P35221	CTNNA1	Catenin alpha-1 OS=Homo sapiens GN=CTNNA1 PE=1 SV=1	53.8631	100	5.37656e+08	5.42409e+08	6.02784e+08	679755564	5.21347e+08	5.61829e+08	494543161	2.81182e+08	5.30353e+08
P26232	CTNNA2	Catenin alpha-2 OS=Homo sapiens GN=CTNNA2 PE=1 SV=5	9.96852	105.2	232764904			2.53115e+08	130957192	2.79415e+08	2.12421e+08		2.82084e+08
Q9UBT7	CTNNAL1	Alpha-catulin OS=Homo sapiens GN=CTNNAL1 PE=1 SV=2	16.0763	81.8	8.10787e+07	5.48448e+07	9.86451e+07	6.49507e+07	4.84447e+07	6.28961e+07	7.40705e+07	3.43705e+07	6.47262e+07
P35222	CTNNB1	Catenin beta-1 OS=Homo sapiens GN=CTNNB1 PE=1 SV=1	68.1178	85.4	1.94266e+09	1581384762	1.66714e+09	1.47738e+09	1624203648	1.40422e+09	1.66897e+09	1.05045e+09	1.74206e+09
Q9NSA3	CTNNBIP1	Beta-catenin-interacting protein 1 OS=Homo sapiens GN=CTNNBIP1 PE=1 SV=1	67.9012	9.2				219847208	164091444	2.09776e+07	9.09897e+07	116594686	1.45444e+08
Q8WYA6	CTNNBL1	Beta-catenin-like protein 1 OS=Homo sapiens GN=CTNNBL1 PE=1 SV=1	40.3197	65.1	4.99987e+08	5.15745e+08	5.51086e+08	3.94623e+08	3.59417e+08	4.07717e+08	4.28532e+08	2.6104e+08	4.22088e+08
O60716	CTNND1	Catenin delta-1 OS=Homo sapiens GN=CTNND1 PE=1 SV=1	52.0661	108.1	8.7344e+08	1.11045e+09	1.26547e+09	1.26939e+09	1.0568e+09	9.25229e+08	1.03937e+09	6.75431e+08	1.04619e+09
P17812	CTPS1	CTP synthase 1 OS=Homo sapiens GN=CTPS PE=1 SV=2	40.9475	66.6	3.3322e+08	3.28225e+08	3.43118e+08	409625249	3.80927e+08	4.1583e+08	3.54768e+08	2.60568e+08	3.50771e+08
Q9NRF8	CTPS2	CTP synthase 2 OS=Homo sapiens GN=CTPS2 PE=1 SV=1	29.3515	65.6	1.2893e+08	9.39807e+07	1.17483e+08	1.44118e+08	1.07766e+08	1.33343e+08	9.48756e+07	4.8032e+07	1.15732e+08
Q6PD62	CTR9	RNA polymerase-associated protein CTR9 homolog OS=Homo sapiens GN=CTR9 PE=1 SV=1	28.6445	133.4	1.93838e+08	1.42421e+08	1.62913e+08	1.53064e+08	141548290	1.96026e+08	1.86823e+08	1.43255e+08	1.65125e+08
P10619	CTSA	Lysosomal protective protein OS=Homo sapiens GN=CTSA PE=1 SV=2	34.1667	54.4	1.18224e+09	1.22444e+09	1.27314e+09	1.1543e+09	1.15219e+09	1.18158e+09	1.28022e+09	5.86508e+08	1.20685e+09
P07858	CTSB	Cathepsin B OS=Homo sapiens GN=CTSB PE=1 SV=3	44.2478	37.8	2.21409e+09	2.08989e+09	2.49671e+09	1.76258e+09	1.85771e+09	1.83139e+09	2.38702e+09	1607247403	2.03035e+09
P53634	CTSC	Dipeptidyl peptidase 1 OS=Homo sapiens GN=CTSC PE=1 SV=1	51.4039	51.8	4.29187e+08	4.4931e+08	5.38218e+08	4.20068e+08	3.54786e+08	3.73475e+08	438130921	2.89266e+08	4.6439e+08
P07339	CTSD	Cathepsin D OS=Homo sapiens GN=CTSD PE=1 SV=1	52.4272	44.5	4.30594e+09	4.08126e+09	4.80078e+09	4.33052e+09	3.98102e+09	4.33346e+09	4.78344e+09	2.92693e+09	5.28737e+09
P09668	CTSH	Cathepsin H OS=Homo sapiens GN=CTSH PE=1 SV=4	25.3731	37.4	2.57387e+08	2.59555e+08	2.75322e+08	3.20574e+08	2.88935e+08	1.32204e+08	1.83845e+08	115170954	369485187
P07711	CTSL	Cathepsin L1 OS=Homo sapiens GN=CTSL1 PE=1 SV=2	25.8258	37.5	1.42326e+08	2.15965e+08	2.68862e+08	143788187	9.90851e+07	2.3604e+08	1.27344e+08	8.35611e+07	1.64128e+08
Q14247	CTTN	Src substrate cortactin OS=Homo sapiens GN=CTTN PE=1 SV=2	36.9091	61.5	5.37043e+08	4.76372e+08	447247554	5.88099e+08	5.62824e+08	6.18372e+08	6.73313e+08	4.46265e+08	6.21582e+08
Q7Z7A3	CTU1	Cytoplasmic tRNA 2-thiolation protein 1 OS=Homo sapiens GN=CTU1 PE=1 SV=1	4.5977	36.4
Q13616	CUL1	Cullin-1 OS=Homo sapiens GN=CUL1 PE=1 SV=2	37.2423	89.6	1.75338e+08	1.66595e+08	2.15575e+08	1.5357e+08	1.7727e+08	1.86883e+08	1.77195e+08	1.03815e+08	1.62542e+08
Q13617	CUL2	Cullin-2 OS=Homo sapiens GN=CUL2 PE=1 SV=2	45.6376	86.9	3.76321e+08	2.2611e+08	2.63811e+08	2.11466e+08	1.86569e+08	2.18697e+08	2.25096e+08	1.62575e+08	2.57756e+08
Q13618	CUL3	Cullin-3 OS=Homo sapiens GN=CUL3 PE=1 SV=2	45.5729	88.9	9.10346e+07	9.33983e+07	1.28142e+08	1.06786e+08	1.57583e+08	1.58561e+08	1.26942e+08	8.34738e+07	1.73903e+08
Q13619	CUL4A	Cullin-4A OS=Homo sapiens GN=CUL4A PE=1 SV=3	34.6509	87.6	1.45361e+08	1.87522e+08	2.34486e+08	7.97525e+07	1.17875e+08	1.00574e+08	1.94282e+08	8.62505e+07	1.51906e+08
Q13620	CUL4B	Cullin-4B OS=Homo sapiens GN=CUL4B PE=1 SV=3	23.352	102.2	9.294e+07	1.03318e+08	7.79753e+07	7.1508e+07	1.1998e+08	8.17049e+07	93705966	5.79504e+07	9.07057e+07
Q93034	CUL5	Cullin-5 OS=Homo sapiens GN=CUL5 PE=1 SV=4	23.8462	90.9	5.51566e+07	34697986	4.59056e+07	5.2352e+07	5.09153e+07	4.21267e+07	4.30449e+07	1.64666e+07	3.96203e+07
Q14999	CUL7	Cullin-7 OS=Homo sapiens GN=CUL7 PE=1 SV=2	10.3062	191	4.35894e+07	2.65989e+07	5.06649e+07	5.41333e+06	34125228	4.60036e+06	2.01756e+08	461303920	2.42292e+07
Q96C57	CUSTOS	Uncharacterized protein C12orf43 OS=Homo sapiens GN=C12orf43 PE=1 SV=2	29.0076	28.2	3.1368e+07			1.25741e+07	1.98743e+07	18957833	2.89955e+07	6404044
O60888	CUTA	Protein CutA OS=Homo sapiens GN=CUTA PE=1 SV=2	40.7821	19.1	7.96758e+08	8.16652e+08	8.64535e+08	4.84656e+08	7.85696e+08	8.99257e+08	8.63206e+08	5.46214e+08	8.95802e+08
Q9NTM9	CUTC	Copper homeostasis protein cutC homolog OS=Homo sapiens GN=CUTC PE=1 SV=1	46.8864	29.3	1.36384e+08	1.32585e+08	1.13898e+08	1.3555e+08	1.48497e+08	9.25864e+07	1.69637e+08	5.62602e+07	1.48206e+08
Q13948	CUX1	Protein CASP OS=Homo sapiens GN=CUX1 PE=1 SV=2	28.3186	77.4				1.1861e+08	1.03859e+08
P39880	CUX1	Homeobox protein cut-like 1 OS=Homo sapiens GN=CUX1 PE=1 SV=2	10.0332	164.2	5.22562e+06	5.45401e+06	8.96259e+06
Q9P013	CWC15	Protein CWC15 homolog OS=Homo sapiens GN=CWC15 PE=1 SV=2	21.8341	26.6	6.26835e+07	121349020	1.69249e+08	5.04291e+07	3.6357e+07	5.08733e+07	5.51638e+07	6.2599e+07	6.75257e+07
Q9HCG8	CWC22	Pre-mRNA-splicing factor CWC22 homolog OS=Homo sapiens GN=CWC22 PE=1 SV=2	18.5022	105.5	1.15295e+08	1.15607e+08	1.12185e+08	1.25789e+08	1.13575e+08	9.14496e+07	1.00922e+08	7.4137e+07	1.2675e+08
Q6UX04	CWC27	Peptidyl-prolyl cis-trans isomerase SDCCAG10 OS=Homo sapiens GN=SDCCAG10 PE=1 SV=1	32.6271	53.8	6.56089e+07	9.17751e+07	1.41432e+08	1.0107e+08	4.49111e+07	1.03763e+08	1.12378e+08	5.2992e+07	1.06427e+08
Q69YN2	CWF19L1	CWF19-like protein 1 OS=Homo sapiens GN=CWF19L1 PE=1 SV=2	38.1041	60.6	1.06961e+08	9.23567e+07	1.21076e+08	1.39939e+08	1.2084e+08	1.39354e+08	7.91722e+07	6.98392e+07	1.41719e+08
Q2TBE0	CWF19L2	CWF19-like protein 2 OS=Homo sapiens GN=CWF19L2 PE=1 SV=3	3.59551	103.3	7.74671e+06	1.36443e+07	2.18006e+07
P78310	CXADR	Coxsackievirus and adenovirus receptor OS=Homo sapiens GN=CXADR PE=1 SV=1	51.2329	40	1.0729e+09	783449958	1.18849e+09	9.10195e+08	9.57733e+08	1.01414e+09	6.86922e+08	4.61038e+08	978620444
Q9H2A7	CXCL16	C-X-C motif chemokine 16 OS=Homo sapiens GN=CXCL16 PE=2 SV=4	5.51181	27.6
Q9P0U4	CXXC1	CpG-binding protein OS=Homo sapiens GN=CXXC1 PE=1 SV=2	15.0915	75.7	2.52814e+07	3.36708e+07	6.39908e+07	2.48564e+07	2.05678e+07	1.92176e+07	58167700	11081993	3.82496e+07
O14569	CYB561D2	Cytochrome b561 domain-containing protein 2 OS=Homo sapiens GN=CYB561D2 PE=1 SV=1	5.40541	24	41365668	6.72103e+07	29151315	36058034	65894901	65054550			46081800
P00167	CYB5A	Cytochrome b5 OS=Homo sapiens GN=CYB5A PE=1 SV=2	55.9701	15.3	4.04179e+09	3.93249e+09	4.33086e+09	3.56292e+09	3.19766e+09	3.47356e+09	3.379e+09	2294058378	3.36332e+09
O43169	CYB5B	Cytochrome b5 type B OS=Homo sapiens GN=CYB5B PE=1 SV=2	67.1233	16.3	6.96035e+09	6.61429e+09	7.57261e+09	5911977431	6.19914e+09	6.57693e+09	5.45097e+09	3.45674e+09	5.80049e+09
Q9UHQ9	CYB5R1	NADH-cytochrome b5 reductase 1 OS=Homo sapiens GN=CYB5R1 PE=1 SV=1	48.1967	34.1	2.33147e+08	2.45518e+08	2.87716e+08	2.77796e+08	2.67587e+08	1.08079e+08	212746826	8.08659e+07	224272592
P00387	CYB5R3	NADH-cytochrome b5 reductase 3 OS=Homo sapiens GN=CYB5R3 PE=1 SV=3	75.0831	34.2	4.84188e+09	4.97238e+09	5.34052e+09	4.88853e+09	4718709454	4.84465e+09	4.60588e+09	3.30669e+09	4.64544e+09
P13498	CYBA	Cytochrome b-245 light chain OS=Homo sapiens GN=CYBA PE=1 SV=2	32.3077	20.9	383644977	2.8893e+08	3.26808e+08	547189614	5.11712e+08	497313792	334363203	1.19841e+08	6.12382e+08
Q9BQA9	CYBC1	Uncharacterized protein C17orf62 OS=Homo sapiens GN=C17orf62 PE=1 SV=1	24.5989	20.8	1.04796e+08	1.76992e+08	1.45854e+08	38852679	1.21124e+08	1.01684e+08	9.40607e+07	5.05563e+07	1.35482e+08
P08574	CYC1	Cytochrome c1, heme protein, mitochondrial OS=Homo sapiens GN=CYC1 PE=1 SV=2	52.3077	35.4	1.86966e+09	1.95575e+09	2.13893e+09	2.06685e+09	1.81132e+09	1.87641e+09	1.73784e+09	1.10319e+09	1.57656e+09
P99999	CYCS	Cytochrome c OS=Homo sapiens GN=CYCS PE=1 SV=2	56.1905	11.7	2.81673e+09	2.64501e+09	3.38001e+09	3212803065	2.85695e+09	2.97014e+09	2.53542e+09	1.69785e+09	2.88045e+09
Q7L576	CYFIP1	Cytoplasmic FMR1-interacting protein 1 OS=Homo sapiens GN=CYFIP1 PE=1 SV=1	41.8196	145.1	2.00409e+08	1.76681e+08	2.01623e+08	2.14533e+08	2.0156e+08	231889634	1.97812e+08	1.30642e+08	1.82344e+08
Q96F07	CYFIP2	Cytoplasmic FMR1-interacting protein 2 OS=Homo sapiens GN=CYFIP2 PE=1 SV=2	30.4382	148.3	8.93987e+07	9.98557e+07	1.21255e+08	7.19239e+07	1.20724e+08	1.02863e+08	4.99947e+07	5.66455e+07	1.07034e+08
Q9NQC7	CYLD	Probable ubiquitin carboxyl-terminal hydrolase CYLD OS=Homo sapiens GN=CYLD PE=1 SV=1	1.88285	107.2
P05108	CYP11A1	Cytochrome P450 11A1 OS=Homo sapiens GN=CYP11A1 PE=2 SV=2	31.0204	60.1	7.9787e+07	1.18045e+08	1.10229e+08	2.03972e+08	221461124	2.06925e+08	2.65739e+08	2.88959e+08	243971385
P05093	CYP17A1	Cytochrome P450 17A1 OS=Homo sapiens GN=CYP17A1 PE=2 SV=2	22.8175	57.4	9.55571e+07	9.65214e+07	1.09411e+08	2.21762e+08	2.02738e+08	2.98196e+08	2.63861e+08	2.40476e+08	207057709
P04798	CYP1A1	Cytochrome P450 1A1 OS=Homo sapiens GN=CYP1A1 PE=1 SV=1	14.4531	58.1							4.34713e+07	3.30153e+07	7.2537e+07
Q6UW02	CYP20A1	Cytochrome P450 20A1 OS=Homo sapiens GN=CYP20A1 PE=1 SV=1	51.9481	52.4	1.35326e+08	1.87628e+08	5.37853e+08	6.5378e+08	5.59981e+08	6.25002e+08	1.43653e+08	1.27142e+08	6.22235e+08
Q07973	CYP24A1	1,25-dihydroxyvitamin D(3) 24-hydroxylase, mitochondrial OS=Homo sapiens GN=CYP24A1 PE=2 SV=2	2.52918	58.8
Q02318	CYP27A1	Sterol 26-hydroxylase, mitochondrial OS=Homo sapiens GN=CYP27A1 PE=1 SV=1	55.3672	60.2	1223479766	1.24254e+09	1116474980	1.59812e+09	2.3652e+09	2.48107e+09	3.15282e+09	3.68982e+09	3.30706e+09
P51589	CYP2J2	Cytochrome P450 2J2 OS=Homo sapiens GN=CYP2J2 PE=1 SV=2	2.58964	57.6
Q9HB55	CYP3A43	Cytochrome P450 3A43 OS=Homo sapiens GN=CYP3A43 PE=1 SV=1	6.16302	57.6									57924562
P24462	CYP3A7	Cytochrome P450 3A7 OS=Homo sapiens GN=CYP3A7 PE=1 SV=2	2.7833	57.5						1.18027e+07			1.11571e+07
Q9HBI6	CYP4F11	Cytochrome P450 4F11 OS=Homo sapiens GN=CYP4F11 PE=2 SV=2	32.2519	60.2	1.38733e+08	1.06861e+08	1.50318e+08	1.22747e+08	1.53996e+08	1.04341e+08	88056592	3.40486e+07
Q9HCS2	CYP4F12	Cytochrome P450 4F12 OS=Homo sapiens GN=CYP4F12 PE=1 SV=1	22.1374	60.3						2.91563e+07	15077764	2.42606e+06	4.12054e+07
P78329	CYP4F2	Leukotriene-B(4) omega-hydroxylase 1 OS=Homo sapiens GN=CYP4F2 PE=1 SV=1	28.0769	59.8	31480291	5.58558e+07	7.78673e+07		54365283		3.51954e+07	2.74698e+07	5.46513e+07
Q16850	CYP51A1	Lanosterol 14-alpha demethylase OS=Homo sapiens GN=CYP51A1 PE=1 SV=3	50.8946	56.8	5.0799e+08	500366608	503736992	3.05107e+08	2.4265e+08	311626290	2.92988e+08	2.16854e+08	2.9899e+08
Q9UNU6	CYP8B1	7-alpha-hydroxycholest-4-en-3-one 12-alpha-hydroxylase OS=Homo sapiens GN=CYP8B1 PE=2 SV=1	1.39721	58	864853521
Q9NUQ9	CYRIB	Protein FAM49B OS=Homo sapiens GN=FAM49B PE=1 SV=1	35.8025	36.7	1.66183e+08	1.50878e+08	1.79572e+08	1.18685e+08	1.24993e+08	1.33595e+08	1.77173e+08	119819944	9.82547e+07
A8MQ03	CYSRT1	UPF0574 protein C9orf169 OS=Homo sapiens GN=C9orf169 PE=1 SV=1	18.0556	15.3		2.35129e+07		5648821				3.81031e+07	1.4227e+07
Q9H1C7	CYSTM1	UPF0467 protein C5orf32 OS=Homo sapiens GN=C5orf32 PE=2 SV=1	10.3093	10.6		4.74157e+08	4.44526e+08	4.00088e+08	4.07692e+08	401146874	3.86585e+08	3.07204e+08	4.31532e+08
Q99418	CYTH2	Cytohesin-2 OS=Homo sapiens GN=CYTH2 PE=1 SV=2	11.5	46.5	33914055	3.33744e+07	3.03271e+07
Q9NWV4	CZIB	UPF0587 protein C1orf123 OS=Homo sapiens GN=C1orf123 PE=1 SV=1	45.625	18	1.25257e+08	1.30557e+08	1.36653e+08	157476476	160654391	164127568	1.17321e+08	1.0205e+08	112631008
Q8N465	D2HGDH	D-2-hydroxyglutarate dehydrogenase, mitochondrial OS=Homo sapiens GN=D2HGDH PE=1 SV=3	36.2764	56.4	2.02095e+08	2.58346e+08	2.47979e+08	2.09727e+08	1.9909e+08	1.99174e+08	1.3927e+08	1.3065e+08	2.08478e+08
Q9Y4D1	DAAM1	Disheveled-associated activator of morphogenesis 1 OS=Homo sapiens GN=DAAM1 PE=1 SV=2	12.1521	123.4	1.63624e+07	1.75713e+07	2.90061e+07		4.30918e+06	1.00432e+07	2.41375e+07	1.9014e+07	5.25333e+06
Q5VWQ8	DAB2IP	Disabled homolog 2-interacting protein OS=Homo sapiens GN=DAB2IP PE=1 SV=2	9.67199	131.5	3.51192e+07	2.90829e+07	3.29206e+07	11109293	3.55185e+07	3.73288e+07	2.55831e+07	1.52834e+07	1.58016e+07
P61803	DAD1	Dolichyl-diphosphooligosaccharide--protein glycosyltransferase subunit DAD1 OS=Homo sapiens GN=DAD1 PE=1 SV=3	35.3982	12.5	3.3518e+09	3.52298e+09	3.51538e+09	3.55554e+09	3.49384e+09	3.50264e+09	3.54661e+09	2.32065e+09	3.26561e+09
Q14118	DAG1	Dystroglycan OS=Homo sapiens GN=DAG1 PE=1 SV=2	10.9497	97.4	4.14943e+08	4.04794e+08	4.79131e+08	4.26569e+08	5.37467e+08	5.67894e+08	4.42212e+08	1.95803e+08	4.5957e+08
Q9Y4D2	DAGLA	Sn1-specific diacylglycerol lipase alpha OS=Homo sapiens GN=DAGLA PE=1 SV=3	2.11132	114.9
Q8NCG7	DAGLB	Sn1-specific diacylglycerol lipase beta OS=Homo sapiens GN=DAGLB PE=1 SV=2	7.8869	73.7	1.89835e+07	2.39559e+07	2.97082e+07	1.89015e+07	1.98866e+07	2.66488e+07	24396287	1.14903e+07	3.13907e+07
Q5D0E6	DALRD3	DALR anticodon-binding domain-containing protein 3 OS=Homo sapiens GN=DALRD3 PE=2 SV=1	5.52486	59.4
P51397	DAP	Death-associated protein 1 OS=Homo sapiens GN=DAP PE=1 SV=3	22.549	11.2
P51398	DAP3	28S ribosomal protein S29, mitochondrial OS=Homo sapiens GN=DAP3 PE=1 SV=1	54.2714	45.5	1.01007e+09	9.451e+08	1.08547e+09	1.1632e+09	1.02439e+09	1.06201e+09	9.88356e+08	6.33784e+08	1.0689e+09
P53355	DAPK1	Death-associated protein kinase 1 OS=Homo sapiens GN=DAPK1 PE=1 SV=5	1.18881	160
O43293	DAPK3	Death-associated protein kinase 3 OS=Homo sapiens GN=DAPK3 PE=1 SV=1	22.6872	52.5	4.49753e+07	2.99025e+07	4.90427e+07	74776150	32096598	1.1143e+09	3.27935e+07	2.32617e+07	5.12642e+07
P14868	DARS1	Aspartyl-tRNA synthetase, cytoplasmic OS=Homo sapiens GN=DARS PE=1 SV=2	58.6826	57.1	7.56558e+08	6.49469e+08	8.11718e+08	1.00604e+09	8.97853e+08	9.41741e+08	6.39732e+08	5.46729e+08	8.62038e+08
Q6PI48	DARS2	Aspartyl-tRNA synthetase, mitochondrial OS=Homo sapiens GN=DARS2 PE=1 SV=1	53.4884	73.5	4.02724e+08	4.23337e+08	4.88189e+08	4.67639e+08	3.87646e+08	4.74773e+08	4.11718e+08	2.72277e+08	4.07582e+08
Q9UER7	DAXX	Death domain-associated protein 6 OS=Homo sapiens GN=DAXX PE=1 SV=2	6.75676	81.3	130441677	112015864	1.28321e+08	4.46526e+07	7.88322e+07	8.49817e+07	5.5009e+07	4.22778e+07	1.1747e+08
Q96EP5	DAZAP1	DAZ-associated protein 1 OS=Homo sapiens GN=DAZAP1 PE=1 SV=1	31.2039	43.4	9.81689e+08	1.15958e+09	1.20332e+09	1.16404e+09	1.06917e+09	1.0096e+09	1.1297e+09	5.77226e+08	1.26114e+09
P07108	DBI	Acyl-CoA-binding protein OS=Homo sapiens GN=DBI PE=1 SV=2	50.5747	10	1.74919e+09	2.07675e+09	1.47803e+09	1747267501	1945613667	1.91125e+09	1.43105e+09	1.37841e+09	2.00263e+09
Q16643	DBN1	Drebrin OS=Homo sapiens GN=DBN1 PE=1 SV=4	53.1587	71.4	1.24399e+09	1.27482e+09	1.39727e+09	1.18835e+09	1.10562e+09	1.13741e+09	1.30966e+09	7.60355e+08	1.33899e+09
Q9UJU6	DBNL	Drebrin-like protein OS=Homo sapiens GN=DBNL PE=1 SV=1	40.4651	48.2	2.60436e+08	2.7432e+08	2.18709e+08	223826399	2.10448e+08	3.10094e+08	2.92168e+08	1.95264e+08	3.41213e+08
Q9UK59	DBR1	Lariat debranching enzyme OS=Homo sapiens GN=DBR1 PE=1 SV=2	9.74265	61.5			163113687		5.2859e+07		1.80604e+07		60796680
P11182	DBT	Lipoamide acyltransferase component of branched-chain alpha-keto acid dehydrogenase complex, mitochondrial OS=Homo sapiens GN=DBT PE=1 SV=3	37.1369	53.5	1.5494e+08	1.36752e+08	1.51568e+08	1.25084e+08	9.10368e+07	1.01618e+08	1.20377e+08	9.73229e+07	4.17829e+07
Q9Y4B6	DCAF1	Protein VPRBP OS=Homo sapiens GN=VPRBP PE=1 SV=3	17.1865	168.9	8.33267e+07	6.22691e+07	6.2727e+07	4.95113e+07	5.26409e+07	7.14795e+07	6.35554e+07	5.5099e+07	7.73626e+07
Q8TEB1	DCAF11	DDB1- and CUL4-associated factor 11 OS=Homo sapiens GN=DCAF11 PE=1 SV=1	12.4542	61.6	2.45893e+07	2.65412e+07		2.17131e+07		31338460	2.17023e+07		8.15223e+06
Q9NV06	DCAF13	DDB1- and CUL4-associated factor 13 OS=Homo sapiens GN=DCAF13 PE=1 SV=2	46.0674	51.4	3.45982e+08	3.94724e+08	3.17479e+08	2.76041e+08	2.95325e+08	3.51905e+08	2.42606e+08	1.73775e+08	210057738
Q9NXF7	DCAF16	DDB1- and CUL4-associated factor 16 OS=Homo sapiens GN=DCAF16 PE=1 SV=1	5.55556	24.2					1.92996e+07	1.69857e+07	17427038		3.84175e+07
Q96JK2	DCAF5	DDB1- and CUL4-associated factor 5 OS=Homo sapiens GN=DCAF5 PE=1 SV=2	1.06157	103.9
P61962	DCAF7	DDB1- and CUL4-associated factor 7 OS=Homo sapiens GN=DCAF7 PE=1 SV=1	20.4678	38.9	193895508	198119204	204792144	1.14512e+07	6.91776e+06	6348479	1.41349e+07	80648169
Q5TAQ9	DCAF8	DDB1- and CUL4-associated factor 8 OS=Homo sapiens GN=DCAF8 PE=1 SV=1	4.0201	66.8	2.06142e+07						5.41543e+07	35002640	26026910
Q8WVC6	DCAKD	Dephospho-CoA kinase domain-containing protein OS=Homo sapiens GN=DCAKD PE=1 SV=1	40.2597	26.5	1.45275e+08	1.30825e+08	1.0429e+08	1.28015e+08	1.11034e+08	1.18815e+08	1.46904e+08	7.09222e+07	1.27939e+08
Q9UHG0	DCDC2	Doublecortin domain-containing protein 2 OS=Homo sapiens GN=DCDC2 PE=1 SV=2	7.14286	52.8							7752199	8.80115e+06
P27707	DCK	Deoxycytidine kinase OS=Homo sapiens GN=DCK PE=1 SV=1	10.3846	30.5	3.62774e+07	3.42096e+07			39845979		3.48436e+07	2.83766e+07
Q9NPI6	DCP1A	mRNA-decapping enzyme 1A OS=Homo sapiens GN=DCP1A PE=1 SV=1	29.7251	63.2	4.25977e+07	26891590	3.2624e+07	3.54019e+07	3.03055e+07	2.62694e+07	3.32115e+07	2.35614e+07	4.26578e+07
Q8IU60	DCP2	mRNA-decapping enzyme 2 OS=Homo sapiens GN=DCP2 PE=1 SV=2	2.38095	48.4	6.59342e+06	7.09014e+06	9.77214e+06
Q96C86	DCPS	Scavenger mRNA-decapping enzyme DcpS OS=Homo sapiens GN=DCPS PE=1 SV=2	32.6409	38.6	6.43063e+07	3.27905e+07	7.46766e+07	9.97428e+07	111238842	64787023	3.59936e+07	5.13847e+07	6.91551e+07
P32321	DCTD	Deoxycytidylate deaminase OS=Homo sapiens GN=DCTD PE=1 SV=2	16.2921	20		2.2004e+07				3.53229e+07	2.82075e+07		3.31521e+07
Q14203	DCTN1	Dynactin subunit 1 OS=Homo sapiens GN=DCTN1 PE=1 SV=3	43.975	141.6	2.13105e+08	2.68889e+08	3.22283e+08	3.42379e+08	2.94504e+08	2.93979e+08	2.57666e+08	3.01206e+08	2.70366e+08
Q13561	DCTN2	Dynactin subunit 2 OS=Homo sapiens GN=DCTN2 PE=1 SV=4	56.3591	44.2	7.13864e+08	8.41059e+08	8.27427e+08	5.22309e+08	4.88789e+08	515375924	5.23247e+08	3.80037e+08	5.05322e+08
O75935	DCTN3	Dynactin subunit 3 OS=Homo sapiens GN=DCTN3 PE=1 SV=1	15.0538	21.1		41359066	42680212	43718290			37749675	3.77848e+07	5.16601e+07
Q9UJW0	DCTN4	Dynactin subunit 4 OS=Homo sapiens GN=DCTN4 PE=1 SV=1	36.7391	52.3	1.21732e+08	1.26099e+08	1.22876e+08	7.16088e+07	8.07554e+07	8.91705e+07	8.75767e+07	6.83071e+07	5.98364e+07
Q9BTE1	DCTN5	Dynactin subunit 5 OS=Homo sapiens GN=DCTN5 PE=1 SV=1	5.49451	20.1	95638648	86645424	1.03863e+08	69255714	77984016	99325872	99216380	70397348	85221517
O00399	DCTN6	Dynactin subunit 6 OS=Homo sapiens GN=DCTN6 PE=1 SV=1	16.8421	20.7	1.00823e+08	119176135	140975368	9.25218e+07	1.08289e+08	1.0614e+08	1.25632e+08	4.88018e+07	1.03176e+08
Q9H773	DCTPP1	dCTP pyrophosphatase 1 OS=Homo sapiens GN=DCTPP1 PE=1 SV=1	31.7647	18.7	265735957	2.56733e+08	277966407	220066200	1.72912e+08	2.30206e+08	2.96572e+08	2.11959e+08	2.07881e+08
Q96GG9	DCUN1D1	DCN1-like protein 1 OS=Homo sapiens GN=DCUN1D1 PE=1 SV=1	28.9575	30.1	2.24001e+08	1.52164e+08	2.30301e+08	1.89595e+08	1.63996e+08	179530453	1.58045e+08	9.10221e+07	1.74062e+08
Q8IWE4	DCUN1D3	DCN1-like protein 3 OS=Homo sapiens GN=DCUN1D3 PE=2 SV=1	30.5921	34.3	6.10825e+07	6.7214e+07	5.82567e+07	4.63438e+07	4.24097e+07	6.22365e+07	5.10449e+07	2.09219e+07	4.30183e+07
Q9BTE7	DCUN1D5	DCN1-like protein 5 OS=Homo sapiens GN=DCUN1D5 PE=1 SV=1	27.4262	27.5	19563809	3.60448e+07	2.57317e+07	1.17936e+07	1.05646e+07	22130349	2.7704e+07	8.17967e+06	18130615
Q7Z4W1	DCXR	L-xylulose reductase OS=Homo sapiens GN=DCXR PE=1 SV=2	63.5246	25.9	8.13722e+08	1.01951e+09	1.52988e+09	1.14073e+09	1.28339e+09	1.28286e+09	1.00285e+09	5.01422e+08	1.66135e+09
Q9BW61	DDA1	DET1- and DDB1-associated protein 1 OS=Homo sapiens GN=DDA1 PE=1 SV=1	27.451	11.8	1.23865e+08	97409836	114049346	1.16504e+08	106933811	105684622	161305430	83885441	129228777
O94760	DDAH1	N(G),N(G)-dimethylarginine dimethylaminohydrolase 1 OS=Homo sapiens GN=DDAH1 PE=1 SV=3	57.5439	31.1	294325377	3.02732e+08	3.32612e+08	3.83283e+08	2.02959e+08	2.34831e+08	3.48983e+08	1.55555e+08	4.0566e+08
O95865	DDAH2	N(G),N(G)-dimethylarginine dimethylaminohydrolase 2 OS=Homo sapiens GN=DDAH2 PE=1 SV=1	51.2281	29.6	2.18869e+08	2.30448e+08	2.37752e+08	1.6515e+08	1.60359e+08	1.64693e+08	299864644	1.39238e+08	3.62433e+08
Q16531	DDB1	DNA damage-binding protein 1 OS=Homo sapiens GN=DDB1 PE=1 SV=1	49.4737	126.9	1371063389	1208335122	1.524e+09	1.62567e+09	1.5377e+09	1.62547e+09	1.25771e+09	7.16682e+08	1.32321e+09
Q92466	DDB2	DNA damage-binding protein 2 OS=Homo sapiens GN=DDB2 PE=1 SV=1	47.3068	47.8	5.02584e+08	481721331	4.95336e+08	3.58953e+08	2.87747e+08	3.8414e+08	4.17485e+08	2.83622e+08	4.34726e+08
P20711	DDC	Aromatic-L-amino-acid decarboxylase OS=Homo sapiens GN=DDC PE=1 SV=1	8.33333	53.9							8662959	8.7429e+06
O94830	DDHD2	Phospholipase DDHD2 OS=Homo sapiens GN=DDHD2 PE=1 SV=2	5.06329	81
Q5TDH0	DDI2	Protein DDI1 homolog 2 OS=Homo sapiens GN=DDI2 PE=1 SV=1	34.0852	44.5	9.26693e+07	9.27424e+07	6.0188e+07	9.68708e+07	8.45611e+07	9.54777e+07	1.09263e+08	5.26453e+07	1.01712e+08
P39656	DDOST	Dolichyl-diphosphooligosaccharide--protein glycosyltransferase 48 kDa subunit OS=Homo sapiens GN=DDOST PE=1 SV=4	58.3333	50.8	4.55824e+09	4.8476e+09	5.29283e+09	4.62431e+09	4.22144e+09	4.60246e+09	4.08289e+09	2.64149e+09	4.44514e+09
Q08345	DDR1	Epithelial discoidin domain-containing receptor 1 OS=Homo sapiens GN=DDR1 PE=1 SV=1	5.58598	101.1					7.58418e+06
Q96HY6	DDRGK1	DDRGK domain-containing protein 1 OS=Homo sapiens GN=DDRGK1 PE=1 SV=2	58.2803	35.6	5.52533e+08	5.70018e+08	6.28108e+08	4.90398e+08	4.42426e+08	5.09384e+08	4.74229e+08	3.32521e+08	4.31269e+08
P30046	DDT	D-dopachrome decarboxylase OS=Homo sapiens GN=DDT PE=1 SV=3	62.7119	12.7	1.19982e+09	7.09029e+08	1.3647e+09	7.87328e+08	7.41791e+08	7.88245e+08	7.22378e+08	7.6736e+08	1.13335e+09
Q92499	DDX1	ATP-dependent RNA helicase DDX1 OS=Homo sapiens GN=DDX1 PE=1 SV=2	54.1892	82.4	1.01714e+09	9.21734e+08	1.09988e+09	9.90477e+08	8.69206e+08	9.33506e+08	9.25593e+08	5.25351e+08	1.0423e+09
Q13206	DDX10	Probable ATP-dependent RNA helicase DDX10 OS=Homo sapiens GN=DDX10 PE=1 SV=2	46.2857	100.8	1.43425e+08	1.83275e+08	167613879	1.43054e+08	1.48212e+08	1.5879e+08	1.79932e+08	9.73561e+07	1.59615e+08
Q92841	DDX17	Probable ATP-dependent RNA helicase DDX17 OS=Homo sapiens GN=DDX17 PE=1 SV=1	54.4615	72.3	2.36531e+09	2.43051e+09	2.58796e+09	2.24861e+09	2.09871e+09	2.13126e+09	2.36565e+09	1.5831e+09	2419122046
Q9NVP1	DDX18	ATP-dependent RNA helicase DDX18 OS=Homo sapiens GN=DDX18 PE=1 SV=2	58.209	75.4	1.41319e+09	1.86808e+09	2.16543e+09	1.65102e+09	1.62058e+09	1.71375e+09	1.48638e+09	960961737	1.57984e+09
Q9NUU7	DDX19A	ATP-dependent RNA helicase DDX19A OS=Homo sapiens GN=DDX19A PE=1 SV=1	44.5607	53.9				1.31459e+08	1.16219e+08	1.74911e+08	1.39577e+08	7.98222e+07	1.40431e+08
Q9UMR2	DDX19B	ATP-dependent RNA helicase DDX19B OS=Homo sapiens GN=DDX19B PE=1 SV=1	53.0271	53.9	2.00739e+07	3.49289e+07	9.80449e+07	1.41057e+08	1.36411e+08	1.38166e+08	7.9649e+07	5.67756e+07
Q9UHI6	DDX20	Probable ATP-dependent RNA helicase DDX20 OS=Homo sapiens GN=DDX20 PE=1 SV=2	27.5485	92.2	2.92392e+07	2.31011e+07	4.57745e+07			3.40062e+07	2.30518e+07	1.31823e+07	4.93143e+07
Q9NR30	DDX21	Nucleolar RNA helicase 2 OS=Homo sapiens GN=DDX21 PE=1 SV=5	55.811	87.3	4067906193	3.99164e+09	4.44725e+09	3.82364e+09	3.82637e+09	4120605061	4.05968e+09	2.73071e+09	4.34001e+09
Q9BUQ8	DDX23	Probable ATP-dependent RNA helicase DDX23 OS=Homo sapiens GN=DDX23 PE=1 SV=3	40.8537	95.5	3.59805e+08	3.817e+08	4.16216e+08	3.41215e+08	3.17899e+08	3.39565e+08	3.26257e+08	2.03201e+08	3.2812e+08
Q9GZR7	DDX24	ATP-dependent RNA helicase DDX24 OS=Homo sapiens GN=DDX24 PE=1 SV=1	39.8137	96.3	2.21076e+08	2.14395e+08	2.5971e+08	2.09924e+08	1.94979e+08	2.02e+08	3.64726e+08	1.39844e+08	2.17242e+08
Q96GQ7	DDX27	Probable ATP-dependent RNA helicase DDX27 OS=Homo sapiens GN=DDX27 PE=1 SV=2	43.3417	89.8	8.74107e+08	8.69413e+08	9.0344e+08	8.50576e+08	8.56254e+08	8.8529e+08	9.00353e+08	5.68411e+08	8.86769e+08
Q9NUL7	DDX28	Probable ATP-dependent RNA helicase DDX28 OS=Homo sapiens GN=DDX28 PE=2 SV=1	33.5185	59.5	1.48256e+08	1.31831e+08	1.56159e+08	1.24367e+08	1.19399e+08	1.3064e+08	1.29272e+08	6.53245e+07	1.41636e+08
Q9H8H2	DDX31	Probable ATP-dependent RNA helicase DDX31 OS=Homo sapiens GN=DDX31 PE=1 SV=2	15.0411	94	5.59113e+07	7.32465e+07	6.75708e+07	6.33849e+07	7.46127e+07	8.03597e+07	41224415	4.56326e+07	6.03747e+07
O00148	DDX39A	ATP-dependent RNA helicase DDX39 OS=Homo sapiens GN=DDX39 PE=1 SV=2	49.1803	49.1	3.6414e+08	351443549	3.08082e+08	3.24488e+08	325101064	3.63508e+08	3.6669e+08	2.29845e+08	3.69625e+08
Q13838	DDX39B	Spliceosome RNA helicase BAT1 OS=Homo sapiens GN=BAT1 PE=1 SV=1	63.785	49	1.90739e+09	1.91628e+09	3.5489e+09	3.12484e+09	2.839e+09	3.27308e+09	3.15391e+09	1.94386e+09	3.24944e+09
O00571	DDX3X	ATP-dependent RNA helicase DDX3X OS=Homo sapiens GN=DDX3X PE=1 SV=3	65.1057	73.2	7.85026e+08	1.31749e+09	1.71015e+09	9.87668e+08	7.23321e+08	1.31492e+09	1.25728e+09	4.65376e+08	9.12219e+08
O15523	DDX3Y	ATP-dependent RNA helicase DDX3Y OS=Homo sapiens GN=DDX3Y PE=1 SV=2	51.9697	73.1	1.98462e+08	1.96404e+08	2.30875e+08	2.91558e+08	1.97278e+08	2.62749e+08	1.89382e+08	7.35839e+07	2.32806e+08
Q9UJV9	DDX41	Probable ATP-dependent RNA helicase DDX41 OS=Homo sapiens GN=DDX41 PE=1 SV=2	45.4984	69.8	3.91347e+08	1.69416e+08	1.80232e+08	1.79892e+08	1.6387e+08	1.86685e+08	1.92473e+08	2.2704e+08	1.58637e+08
Q86XP3	DDX42	ATP-dependent RNA helicase DDX42 OS=Homo sapiens GN=DDX42 PE=1 SV=1	49.3603	102.9	7.45293e+08	6.73956e+08	7.51599e+08	6.59363e+08	6.01655e+08	6.83345e+08	7.32042e+08	4.79764e+08	7.1823e+08
Q7L014	DDX46	Probable ATP-dependent RNA helicase DDX46 OS=Homo sapiens GN=DDX46 PE=1 SV=2	51.5034	117.3	7.00554e+08	6.99113e+08	6.42831e+08	6.64734e+08	6.3931e+08	6.7585e+08	6.51099e+08	4.43817e+08	6.63609e+08
Q9H0S4	DDX47	Probable ATP-dependent RNA helicase DDX47 OS=Homo sapiens GN=DDX47 PE=1 SV=1	54.7253	50.6	5.68358e+08	5.58498e+08	645731774	5.69369e+08	5.19052e+08	6.14375e+08	5.59223e+08	3.27113e+08	6.08701e+08
Q9Y6V7	DDX49	Probable ATP-dependent RNA helicase DDX49 OS=Homo sapiens GN=DDX49 PE=1 SV=1	52.588	54.2	2.12699e+08	2.11745e+08	2.47747e+08	2.2366e+08	2.09919e+08	210727868	2.10657e+08	1.21787e+08	2.07033e+08
P17844	DDX5	Probable ATP-dependent RNA helicase DDX5 OS=Homo sapiens GN=DDX5 PE=1 SV=1	56.0261	69.1	3.40736e+09	3248060189	3.27701e+09	3.48968e+09	3.49082e+09	2.98996e+09	3.12055e+09	2.168e+09	4.63352e+09
Q9BQ39	DDX50	ATP-dependent RNA helicase DDX50 OS=Homo sapiens GN=DDX50 PE=1 SV=1	39.4844	82.5	2.38875e+08	1.94181e+08	2.64708e+08	2.09868e+08	1.88777e+08	183791806	2.13079e+08	1.39143e+08	2.49432e+08
Q8N8A6	DDX51	ATP-dependent RNA helicase DDX51 OS=Homo sapiens GN=DDX51 PE=1 SV=3	43.6937	72.4	1.56326e+08	1.84758e+08	1.48031e+08	1.17538e+08	1.32987e+08	1.37334e+08	1.39644e+08	1.14574e+08	1.25773e+08
Q9Y2R4	DDX52	Probable ATP-dependent RNA helicase DDX52 OS=Homo sapiens GN=DDX52 PE=1 SV=2	49.2487	67.4	3.56987e+08	3.6837e+08	5.10635e+08	4.77203e+08	3.89726e+08	4.39581e+08	3.92327e+08	2.2374e+08	3.80594e+08
Q8TDD1	DDX54	ATP-dependent RNA helicase DDX54 OS=Homo sapiens GN=DDX54 PE=1 SV=2	50.6243	98.5	2.96041e+08	2.97579e+08	3.85407e+08	364277621	2.99483e+08	3.53828e+08	2.59347e+08	1.84072e+08	3.30637e+08
Q8NHQ9	DDX55	ATP-dependent RNA helicase DDX55 OS=Homo sapiens GN=DDX55 PE=1 SV=2	27.5	68.4	8.46828e+07	1.11963e+08	1.03152e+08	143461122	34102156	3.73917e+07	9.73511e+07	5.53486e+07	1.05664e+08
Q9NY93	DDX56	Probable ATP-dependent RNA helicase DDX56 OS=Homo sapiens GN=DDX56 PE=1 SV=1	51.5539	61.6	4.36552e+08	3.73291e+08	509612520	2.60884e+08	3.01183e+08	3.37702e+08	3.73083e+08	2.59404e+08	2.95071e+08
O95786	DDX58	Probable ATP-dependent RNA helicase DDX58 OS=Homo sapiens GN=DDX58 PE=1 SV=2	1.51351	106.5
Q5T1V6	DDX59	Probable ATP-dependent RNA helicase DDX59 OS=Homo sapiens GN=DDX59 PE=1 SV=1	4.52342	68.8					8.72302e+06			1.73971e+06
P26196	DDX6	Probable ATP-dependent RNA helicase DDX6 OS=Homo sapiens GN=DDX6 PE=1 SV=2	54.4513	54.4	3.67019e+08	3.71303e+08	5.08329e+08	5.00456e+08	4.7677e+08	4.71579e+08	4.50263e+08	3.52225e+08	3.29996e+08
Q5H9U9	DDX60L	Probable ATP-dependent RNA helicase DDX60-like OS=Homo sapiens GN=DDX60L PE=2 SV=1	0.917431	152.1
Q16698	DECR1	2,4-dienoyl-CoA reductase, mitochondrial OS=Homo sapiens GN=DECR1 PE=1 SV=1	54.0299	36	8.60068e+08	8.36082e+08	9.37416e+08	9.17202e+08	888835315	9.14473e+08	865536566	5.77239e+08	9.21391e+08
Q9NUI1	DECR2	Peroxisomal 2,4-dienoyl-CoA reductase OS=Homo sapiens GN=DECR2 PE=1 SV=1	55.4795	30.8	5.18584e+08	4.96483e+08	6.32504e+08	507124451	5.25865e+08	5.2904e+08	4.56571e+08	339219365	5.04529e+08
Q9H4E7	DEF6	Differentially expressed in FDCP 6 homolog OS=Homo sapiens GN=DEF6 PE=1 SV=1	15.0555	73.9	7.48197e+07	5.28008e+07	7.47444e+07	9.89128e+06	21553662	21323743	3.91622e+07	3.27174e+07	2.09654e+07
Q6ZN54	DEF8	Differentially expressed in FDCP 8 homolog OS=Homo sapiens GN=DEF8 PE=2 SV=2	3.32031	58.7
O15121	DEGS1	Sphingolipid delta(4)-desaturase DES1 OS=Homo sapiens GN=DEGS1 PE=1 SV=1	14.8607	37.8	6.04665e+07	1.02818e+08	8.38079e+07	7.97085e+07	9.00868e+07	1.40099e+08	1.16828e+08	7.65663e+07	1.24632e+08
P35659	DEK	Protein DEK OS=Homo sapiens GN=DEK PE=1 SV=1	47.7333	42.6	2.29884e+09	2.2063e+09	2.37486e+09	1511056713	2062743739	2.11962e+09	2.08045e+09	1.3084e+09	2.13697e+09
Q8TCE6	DENND10	Protein FAM45A OS=Homo sapiens GN=FAM45A PE=2 SV=1	39.2157	40.5	40299748	5.13114e+07	2.2073e+08	4.58875e+07	2.26488e+07	3.77913e+07	2.58003e+07	3.16316e+07	2.57333e+07
A2RUS2	DENND3	DENN domain-containing protein 3 OS=Homo sapiens GN=DENND3 PE=2 SV=2	0.66778	135.8					43193775	151364790
Q7Z401	DENND4A	C-myc promoter-binding protein OS=Homo sapiens GN=DENND4A PE=1 SV=2	4.45518	209.1		27932533	40213826	3.86609e+07	2.22012e+07			8.63127e+07
Q5VZ89	DENND4C	DENN domain-containing protein 4C OS=Homo sapiens GN=DENND4C PE=1 SV=2	4.66228	186.7	9.33083e+06	7.47459e+06	12144619					5.3471e+06	4.8694e+06
Q6ZUT9	DENND5B	DENN domain-containing protein 5B OS=Homo sapiens GN=DENND5B PE=1 SV=2	1.41287	144.9
Q8IWF6	DENND6A	Protein FAM116A OS=Homo sapiens GN=FAM116A PE=2 SV=1	3.28947	69.5			1.09572e+07			5.33148e+06	10940067	3.29645e+06
O43583	DENR	Density-regulated protein OS=Homo sapiens GN=DENR PE=1 SV=2	49.4949	22.1	3.92026e+08	3.93376e+08	2.67461e+08	3.05233e+08	2.61902e+08	3.75575e+08	3.40816e+08	1.95865e+08	3.36122e+08
Q8WUY9	DEPDC1B	DEP domain-containing protein 1B OS=Homo sapiens GN=DEPDC1B PE=2 SV=2	2.6465	61.7
Q8TB45	DEPTOR	DEP domain-containing mTOR-interacting protein OS=Homo sapiens GN=DEPDC6 PE=1 SV=2	7.82396	46.3	7.04379e+06	9.63427e+06	3.78246e+07				5.8542e+06
Q9Y315	DERA	Putative deoxyribose-phosphate aldolase OS=Homo sapiens GN=DERA PE=1 SV=2	44.3396	35.2	5.7656e+07	6.31083e+07	8.38793e+08	44931274	8.70278e+07	1.01975e+08	6.05246e+07	3.86181e+07	6.70558e+07
Q9BUN8	DERL1	Derlin-1 OS=Homo sapiens GN=DERL1 PE=1 SV=1	16.3347	28.8	2.4921e+08	2.49961e+08	2.97023e+08	2.4919e+08	2.18711e+08	2.7702e+08	9.01211e+07	1.58518e+08	2.07993e+08
Q9GZP9	DERL2	Derlin-2 OS=Homo sapiens GN=DERL2 PE=1 SV=1	20.5021	27.5	1.17722e+08	1.53759e+08	1.36596e+08	1.35761e+08	1.49404e+08	1.17487e+08	1.27331e+08	1.23794e+08	9.28672e+07
Q6ICB0	DESI1	PPPDE peptidase domain-containing protein 2 OS=Homo sapiens GN=PPPDE2 PE=1 SV=1	4.7619	18.3
Q9BSY9	DESI2	PPPDE peptidase domain-containing protein 1 OS=Homo sapiens GN=PPPDE1 PE=2 SV=1	8.76289	21.4							40313442
O00273	DFFA	DNA fragmentation factor subunit alpha OS=Homo sapiens GN=DFFA PE=1 SV=1	49.8489	36.5	1.02292e+08	8.11178e+07	122734982	1.40337e+08	1.40898e+08	1.64784e+08	121680203	7.85809e+07	129163004
O76075	DFFB	DNA fragmentation factor subunit beta OS=Homo sapiens GN=DFFB PE=1 SV=1	18.3432	39.1						3.67879e+07	2.79714e+07
O75907	DGAT1	Diacylglycerol O-acyltransferase 1 OS=Homo sapiens GN=DGAT1 PE=2 SV=2	24.5902	55.2	231713683	3.34677e+08	3.57301e+08	1.83951e+08	2.84905e+08	268421985	3.22132e+08	2.40292e+08	2.30518e+08
Q8WYQ5	DGCR8	Microprocessor complex subunit DGCR8 OS=Homo sapiens GN=DGCR8 PE=1 SV=1	3.75162	86	20528689		25502050	26197760			28002292		3.57878e+07
P23743	DGKA	Diacylglycerol kinase alpha OS=Homo sapiens GN=DGKA PE=1 SV=3	2.9932	82.6
P52429	DGKE	Diacylglycerol kinase epsilon OS=Homo sapiens GN=DGKE PE=1 SV=1	2.29277	63.9	746452442					2.95036e+07
Q5KSL6	DGKK	Diacylglycerol kinase kappa OS=Homo sapiens GN=DGKK PE=1 SV=1	3.93391	141.7				8940704			24364001		2.21798e+07
Q7Z3D6	DGLUCY	UPF0317 protein C14orf159, mitochondrial OS=Homo sapiens GN=C14orf159 PE=2 SV=2	15.0974	66.4	1.32993e+07	1.13982e+07	4.65346e+07		4.11818e+07	3.35143e+07	51448285	3.35959e+07	3.33423e+07
Q16854	DGUOK	Deoxyguanosine kinase, mitochondrial OS=Homo sapiens GN=DGUOK PE=1 SV=2	35.7401	32	1.61471e+08	1.16705e+08	1.05553e+08		38917442	1.10519e+08	1.13596e+08	1.12204e+08	6.76684e+07
Q15392	DHCR24	24-dehydrocholesterol reductase OS=Homo sapiens GN=DHCR24 PE=1 SV=2	43.2171	60.1	1.2597e+09	1.24587e+09	1.38921e+09	1.26778e+09	1.34893e+09	1.26318e+09	1141041753	8.46991e+08	1.31469e+09
Q9UBM7	DHCR7	7-dehydrocholesterol reductase OS=Homo sapiens GN=DHCR7 PE=1 SV=1	16.6316	54.5	4.15943e+08	4.16902e+08	4.64137e+09	2.10289e+08	1.54009e+08	2.52569e+08	1.35009e+08	1.52182e+08	1.72172e+09
Q86SQ9	DHDDS	Dehydrodolichyl diphosphate synthase OS=Homo sapiens GN=DHDDS PE=2 SV=3	19.8198	38.6		46802230	1.22271e+08	5.04315e+07	4.24371e+07	45572134	1.90327e+07	2.38806e+07	23261090
P00374	DHFR	Dihydrofolate reductase OS=Homo sapiens GN=DHFR PE=1 SV=2	64.7059	21.4	1.77049e+08	1.65099e+08	1.81485e+08	1.07458e+08	127063204	1.99887e+08	2.15647e+08	1.31109e+08	1.87677e+08
Q02127	DHODH	Dihydroorotate dehydrogenase, mitochondrial OS=Homo sapiens GN=DHODH PE=1 SV=3	40.7595	42.8	2.61497e+08	2.68418e+08	2.07326e+08	2.61889e+08	1.90686e+08	2.56489e+08	2.80605e+08	169546739	1.75652e+08
P49366	DHPS	Deoxyhypusine synthase OS=Homo sapiens GN=DHPS PE=1 SV=1	24.1192	40.9	2.32176e+07	1.2726e+07	1.28142e+07	44935310	2.0944e+07		1.62347e+07	1.67021e+07	2.13266e+07
Q96LJ7	DHRS1	Dehydrogenase/reductase SDR family member 1 OS=Homo sapiens GN=DHRS1 PE=1 SV=1	60.0639	33.9	3.87822e+08	1.0507e+09	1.10437e+09	1018346404	1141058270	1.04261e+09	3.73095e+08	2.36594e+08	1117767948
Q6UWP2	DHRS11	Dehydrogenase/reductase SDR family member 11 OS=Homo sapiens GN=DHRS11 PE=1 SV=1	14.6154	28.3
Q6UX07	DHRS13	Dehydrogenase/reductase SDR family member 13 OS=Homo sapiens GN=DHRS13 PE=1 SV=1	7.95756	40.8
Q13268	DHRS2	Dehydrogenase/reductase SDR family member 2 OS=Homo sapiens GN=DHRS2 PE=1 SV=3	83.3333	27.4	7332104159	7.34053e+09	9.52498e+09	7.5288e+09	7.45048e+09	8.79033e+09	7.23887e+09	4.88117e+09	8.69041e+09
O75911	DHRS3	Short-chain dehydrogenase/reductase 3 OS=Homo sapiens GN=DHRS3 PE=1 SV=2	26.8212	33.5	5.80701e+07	7.97357e+07	8.87288e+07	1.01069e+08	1.041e+08	110723724	39215075	27440168	99617185
Q9BTZ2	DHRS4	Dehydrogenase/reductase SDR family member 4 OS=Homo sapiens GN=DHRS4 PE=1 SV=2	52.3077	27.6	3.40833e+08	3.19126e+08	3.75461e+08	2.92471e+08	2.61149e+08	2.96309e+08	3.07725e+08	2.21814e+08	2.27874e+08
Q9Y394	DHRS7	Dehydrogenase/reductase SDR family member 7 OS=Homo sapiens GN=DHRS7 PE=1 SV=1	49.2625	38.3	2.14937e+08	2.18152e+08	1.92038e+08	2.46211e+08	2.1472e+08	2.55631e+08	2.09752e+08	121895631	2.11647e+08
Q6IAN0	DHRS7B	Dehydrogenase/reductase SDR family member 7B OS=Homo sapiens GN=DHRS7B PE=1 SV=2	30.7692	35.1	3.45424e+08	3.48872e+08	3.38281e+08	3.44414e+08	3.01534e+08	3.27849e+08	2.89759e+08	1.68697e+08	319831891
Q8N5I4	DHRSX	Dehydrogenase/reductase SDR family member on chromosome X OS=Homo sapiens GN=DHRSX PE=2 SV=2	5.15152	36.4
Q96HY7	DHTKD1	Probable 2-oxoglutarate dehydrogenase E1 component DHKTD1, mitochondrial OS=Homo sapiens GN=DHTKD1 PE=2 SV=1	20.6746	103	4.11757e+07	2.93497e+07	5.01073e+07	4.81799e+07	5.61899e+07	6.11114e+07	4.5661e+07		6.28903e+07
O43143	DHX15	Putative pre-mRNA-splicing factor ATP-dependent RNA helicase DHX15 OS=Homo sapiens GN=DHX15 PE=1 SV=2	56.9811	90.9	2.23612e+09	1.5522e+09	1.9094e+09	1.58947e+09	1.52032e+09	1.67391e+09	1.50678e+09	8.52836e+08	1.64952e+09
O60231	DHX16	Putative pre-mRNA-splicing factor ATP-dependent RNA helicase DHX16 OS=Homo sapiens GN=DHX16 PE=1 SV=2	38.3285	119.2	2.15837e+08	1.94863e+08	2.28938e+08	1.70516e+08	1.70306e+08	1.79501e+08	2.11505e+08	1.16664e+08	2.49477e+08
Q7Z478	DHX29	ATP-dependent RNA helicase DHX29 OS=Homo sapiens GN=DHX29 PE=1 SV=2	15.3397	155.1	3.41271e+07	3.57484e+07	5.52723e+07	3.84306e+07	3.45022e+07	4.38431e+07	3.59748e+07	1.64261e+07	4.4499e+07
Q7L2E3	DHX30	Putative ATP-dependent RNA helicase DHX30 OS=Homo sapiens GN=DHX30 PE=1 SV=1	53.5176	133.9	3.97112e+08	3.66188e+08	4.34436e+08	3.94681e+08	3.84274e+08	3.87666e+08	4.39768e+08	2.53909e+08	5.26117e+08
Q7L7V1	DHX32	Putative pre-mRNA-splicing factor ATP-dependent RNA helicase DHX32 OS=Homo sapiens GN=DHX32 PE=1 SV=1	1.61507	84.4	8.06277e+06			7080246	6.84321e+06	1.07759e+07	7.68329e+06		1.006e+07
Q9H6R0	DHX33	Putative ATP-dependent RNA helicase DHX33 OS=Homo sapiens GN=DHX33 PE=1 SV=1	18.8119	78.7	7.75671e+07	7.14835e+07	8.0759e+07	7.7054e+07	4.95747e+07	63085467	4.81735e+07	5.3881e+07	7.85674e+07
Q14147	DHX34	Probable ATP-dependent RNA helicase DHX34 OS=Homo sapiens GN=DHX34 PE=2 SV=1	7.8125	64.5	1.83119e+07			2.70137e+07	1.71094e+07	2.92592e+07		1.33365e+07
Q9H5Z1	DHX35	Probable ATP-dependent RNA helicase DHX35 OS=Homo sapiens GN=DHX35 PE=1 SV=2	20.9104	78.9	2.6113e+07	2.88416e+07	2.9903e+07	2.91491e+06	1.65221e+07	2.74623e+07	3.70796e+07	1.33454e+07	3.40543e+07
Q9H2U1	DHX36	Probable ATP-dependent RNA helicase DHX36 OS=Homo sapiens GN=DHX36 PE=1 SV=1	24.2063	114.7	6.59202e+07	7.40174e+07	2.64436e+08	4.06134e+07	5.45143e+07	6.34338e+07	7.14993e+07	2.54324e+07	6.59809e+07
Q8IY37	DHX37	Probable ATP-dependent RNA helicase DHX37 OS=Homo sapiens GN=DHX37 PE=1 SV=1	32.4978	129.5	1.74435e+08	1.83213e+08	1.94451e+08	1.48563e+08	130500229	1.51955e+08	1.64491e+08	8.89686e+07	1.73961e+08
Q92620	DHX38	Pre-mRNA-splicing factor ATP-dependent RNA helicase PRP16 OS=Homo sapiens GN=DHX38 PE=1 SV=2	37.8158	140.4	1.26745e+08	1.21446e+08	1.24963e+08	8.77597e+07	9.97681e+07	1.24118e+08	1.52963e+08	1.01033e+08	1.1727e+08
Q8IX18	DHX40	Probable ATP-dependent RNA helicase DHX40 OS=Homo sapiens GN=DHX40 PE=1 SV=2	12.3235	88.5	5.38598e+07	5.02462e+07	6.76736e+07	6.81491e+07	4.0356e+07	6.28839e+07	35872392	2.80866e+07	3.92517e+07
Q6P158	DHX57	Putative ATP-dependent RNA helicase DHX57 OS=Homo sapiens GN=DHX57 PE=1 SV=2	13.9971	155.5	3.26341e+07	1.62433e+07	3.14352e+07	2.74601e+07	2.61673e+07	41816615	1.5278e+07	1.87138e+07	1.85525e+07
Q14562	DHX8	ATP-dependent RNA helicase DHX8 OS=Homo sapiens GN=DHX8 PE=1 SV=1	34.5082	139.2	1.61254e+08	1.77518e+08	1.84166e+08	1.67466e+08	1.47778e+08	1.67784e+08	1.42349e+08	99767252	1.68768e+08
Q08211	DHX9	ATP-dependent RNA helicase A OS=Homo sapiens GN=DHX9 PE=1 SV=4	58.4252	140.9	3.5095e+09	3.52376e+09	3.87851e+09	3.74615e+09	3343995024	3.7008e+09	3.65677e+09	2.51556e+09	3.71495e+09
Q9NR28	DIABLO	Diablo homolog, mitochondrial OS=Homo sapiens GN=DIABLO PE=1 SV=1	47.2803	27.1	519346954	5.35254e+08	5.36246e+08	4.86919e+08	423842900	4.74476e+08	4.22852e+08	2.81588e+08	6.06967e+09
O60610	DIAPH1	Protein diaphanous homolog 1 OS=Homo sapiens GN=DIAPH1 PE=1 SV=2	34.827	141.3	1.65551e+08	1.66154e+08	1.84029e+08	2.08873e+08	1.73502e+08	1.89339e+08	1.52303e+08	1.01967e+08	1.46745e+08
O60879	DIAPH2	Protein diaphanous homolog 2 OS=Homo sapiens GN=DIAPH2 PE=1 SV=1	21.1626	125.5	234712524	9.68716e+07	2.86592e+07	17551894	9.65918e+07	2.28504e+08	2.11595e+07		3.73392e+07
Q9NSV4	DIAPH3	Protein diaphanous homolog 3 OS=Homo sapiens GN=DIAPH3 PE=1 SV=4	5.02934	136.8	5.31246e+06	4.20761e+06					7.46228e+06		1.53912e+07
Q9UPY3	DICER1	Endoribonuclease Dicer OS=Homo sapiens GN=DICER1 PE=1 SV=3	8.11655	218.5	2.72445e+07	1.38564e+07	1.224e+07	2.51989e+07	1.58486e+07	2.00288e+07	2.36492e+07	1.11642e+07	3.34134e+07
Q9BTC0	DIDO1	Death-inducer obliterator 1 OS=Homo sapiens GN=DIDO1 PE=1 SV=5	9.46429	243.7	7.40895e+07	7.72532e+07	8.40695e+07	5.12685e+07	5.55209e+07	5.20963e+07	7.39151e+07	5.05882e+07	7.92883e+07
Q9UNQ2	DIMT1	Probable dimethyladenosine transferase OS=Homo sapiens GN=DIMT1L PE=1 SV=1	49.5208	35.2	2.37642e+08	2.22005e+08	2.6198e+08	1.8291e+08	1.89444e+08	2.09375e+08	2.15194e+08	1.24982e+08	2.23345e+08
Q14689	DIP2A	Disco-interacting protein 2 homolog A OS=Homo sapiens GN=DIP2A PE=2 SV=2	2.16423	170.3
Q9P265	DIP2B	Disco-interacting protein 2 homolog B OS=Homo sapiens GN=DIP2B PE=1 SV=3	22.6523	171.4	39852548	326978560	7.29803e+07	4.66328e+07	7.64016e+07	6.4227e+07	6.31284e+07	4.8022e+07	5.61497e+07
Q5T7M9	DIPK1A	Protein FAM69A OS=Homo sapiens GN=FAM69A PE=2 SV=1	13.3178	49		1.03529e+07	8.30739e+06		55276244	5.48817e+07	8.61075e+07	7.33378e+07	67192618
Q8NDZ4	DIPK2A	UPF0672 protein C3orf58 OS=Homo sapiens GN=C3orf58 PE=1 SV=1	20.4651	49.5	1.52463e+07	2.23012e+08	3.48569e+08	15303539	7.70959e+07	66703330	9.5992e+06		1.53219e+07
Q96HU8	DIRAS2	GTP-binding protein Di-Ras2 OS=Homo sapiens GN=DIRAS2 PE=1 SV=1	5.52764	22.5
Q9Y2L1	DIS3	Exosome complex exonuclease RRP44 OS=Homo sapiens GN=DIS3 PE=1 SV=2	53.3403	108.9	3.56427e+08	3.33648e+08	3.62729e+08	349301725	2.83783e+08	3.2971e+08	3.05284e+08	1.79421e+08	3.44282e+08
Q8IYB7	DIS3L2	DIS3-like exonuclease 2 OS=Homo sapiens GN=DIS3L2 PE=1 SV=3	8.70056	99.1	1.2602e+07	4.14524e+07	2.09842e+07	1.75233e+07	1.76233e+07	2.38111e+07	28182817	1.58684e+07	2.86083e+07
O60832	DKC1	H/ACA ribonucleoprotein complex subunit 4 OS=Homo sapiens GN=DKC1 PE=1 SV=3	62.6459	57.6	1.30339e+09	1.11255e+09	1.37568e+09	1.11176e+09	9.73185e+08	1.45494e+09	9.19658e+08	6.12513e+08	1.2344e+09
O94907	DKK1	Dickkopf-related protein 1 OS=Homo sapiens GN=DKK1 PE=1 SV=1	41.7293	28.7	1.73515e+08	1.59271e+08	2.69367e+08	1.74813e+08	1.99507e+08	1.13235e+08	2.52267e+08	1.30476e+08	2.53626e+08
P10515	DLAT	Dihydrolipoyllysine-residue acetyltransferase component of pyruvate dehydrogenase complex, mitochondrial OS=Homo sapiens GN=DLAT PE=1 SV=3	45.5951	69	1.72143e+09	1609951387	1917694123	1.38046e+09	1.49327e+09	1.54053e+09	1.49317e+09	7.38863e+08	1609772471
P09622	DLD	Dihydrolipoyl dehydrogenase, mitochondrial OS=Homo sapiens GN=DLD PE=1 SV=2	53.0452	54.1	1.98053e+09	1.89933e+09	2.25915e+09	2.07903e+09	1.77917e+09	2.17055e+09	1.6005e+09	1.01758e+09	1.95376e+09
Q12959	DLG1	Disks large homolog 1 OS=Homo sapiens GN=DLG1 PE=1 SV=2	39.7124	100.4	2.70441e+08	2.88507e+08	3.19571e+08	1.98708e+08	2.117e+08	2.31596e+08	1.90316e+08	1.65492e+08	2.60771e+08
Q9Y2H0	DLGAP4	Disks large-associated protein 4 OS=Homo sapiens GN=DLGAP4 PE=1 SV=3	3.22581	107.9					37018997		59708367		53642457
P36957	DLST	Dihydrolipoyllysine-residue succinyltransferase component of 2-oxoglutarate dehydrogenase complex, mitochondrial OS=Homo sapiens GN=DLST PE=1 SV=3	34.8786	48.7	1.59358e+09	2.05255e+09	2.22321e+09	2.38381e+09	2.21236e+09	2.2585e+09	2.09886e+09	1.3363e+09	1.85588e+09
Q96GE9	DMAC1	Transmembrane protein C9orf123 OS=Homo sapiens GN=C9orf123 PE=2 SV=1	32.7586	12.2		128475774				9.7463e+07
Q9NW81	DMAC2	ATP synthase subunit s-like protein OS=Homo sapiens GN=ATP5SL PE=2 SV=2	12.4514	29.2		29245444	31693362	6.83035e+07	59659892	63469256	2.75996e+07	3.10985e+07	2.08789e+07
Q99766	DMAC2L	ATP synthase subunit s, mitochondrial OS=Homo sapiens GN=ATP5S PE=1 SV=2	14.8837	24.9	155839775	1.33198e+08	1.43469e+08	156415150	1.22198e+08		1.621e+08	81894471	1.70825e+08
Q9NPF5	DMAP1	DNA methyltransferase 1-associated protein 1 OS=Homo sapiens GN=DMAP1 PE=1 SV=1	32.334	53	5.16456e+07	7.56556e+07	6.83336e+07	61063481	6.61023e+07	6.15671e+07	9.91861e+07	7.03139e+07	6.82632e+07
P11532	DMD	Dystrophin OS=Homo sapiens GN=DMD PE=1 SV=2	4.93894	426.4	6.95073e+07	1.01195e+08	9.44769e+07	5.42236e+07	65307906	1.15348e+08	1.09491e+08	7.39338e+07	1.35273e+08
Q9UI17	DMGDH	Dimethylglycine dehydrogenase, mitochondrial OS=Homo sapiens GN=DMGDH PE=1 SV=1	11.5473	96.7			4.07211e+06			7.42017e+06
Q08495	DMTN	Dematin OS=Homo sapiens GN=EPB49 PE=1 SV=3	9.38272	45.5	44452835	3.06573e+07	48075960		35574512		4.48861e+07	4.91375e+07	5.71914e+07
Q09019	DMWD	Dystrophia myotonica WD repeat-containing protein OS=Homo sapiens GN=DMWD PE=1 SV=3	5.93472	70.4			2329375720
P51530	DNA2	DNA2-like helicase OS=Homo sapiens GN=DNA2 PE=1 SV=3	2.26415	120.3	9155951	9.79733e+06	1.1295e+07		4.11753e+07	42819655	3.26274e+07		3.9412e+07
Q86Y56	DNAAF5	HEAT repeat-containing protein 2 OS=Homo sapiens GN=HEATR2 PE=1 SV=3	34.8538	93.4	2.24601e+08	2.71476e+08	2.75897e+08	1.66384e+08	1.19523e+08	1.33428e+08	8.47193e+07	8.58793e+07	4.04523e+08
P31689	DNAJA1	DnaJ homolog subfamily A member 1 OS=Homo sapiens GN=DNAJA1 PE=1 SV=2	55.6675	44.8	1.39426e+09	1.41529e+09	1.49048e+09	1.17641e+09	1.03053e+09	1.06743e+09	1.35908e+09	8.61016e+08	1.24284e+09
O60884	DNAJA2	DnaJ homolog subfamily A member 2 OS=Homo sapiens GN=DNAJA2 PE=1 SV=1	60.1942	45.7	1.03242e+09	8.87766e+08	1115625758	1.04787e+09	9.67856e+08	1.00017e+09	9.89409e+08	6.72152e+08	1.05298e+09
Q96EY1	DNAJA3	DnaJ homolog subfamily A member 3, mitochondrial OS=Homo sapiens GN=DNAJA3 PE=1 SV=1	40	52.5	5.68819e+08	6.17167e+08	8.14672e+08	8.52906e+08	5.75698e+08	8.38785e+08	6.99548e+08	441929737	6.20881e+08
Q8WW22	DNAJA4	DnaJ homolog subfamily A member 4 OS=Homo sapiens GN=DNAJA4 PE=1 SV=1	4.78589	44.8	7.32452e+08	7.19048e+08	2.71932e+08		5.6378e+08	181596778	7.31164e+08	8.00963e+07	7.9032e+08
P25685	DNAJB1	DnaJ homolog subfamily B member 1 OS=Homo sapiens GN=DNAJB1 PE=1 SV=4	35.5882	38	4.57505e+08	4.79283e+08	480165856	4.82326e+08	4.25305e+08	4.36632e+08	4.41596e+08	2.86602e+08	4.76417e+08
Q9UBS4	DNAJB11	DnaJ homolog subfamily B member 11 OS=Homo sapiens GN=DNAJB11 PE=1 SV=1	44.9721	40.5	1.28135e+09	1.13366e+09	1.34783e+09	1131141179	1.08659e+09	1.14968e+09	1.18695e+09	7.79589e+08	1.18251e+09
Q9NXW2	DNAJB12	DnaJ homolog subfamily B member 12 OS=Homo sapiens GN=DNAJB12 PE=1 SV=3	34.4	41.8	2.4951e+08	2.5292e+08	1.21975e+08	2.1315e+08	2.50234e+08	1.0893e+08	1.66518e+08	1.10575e+08	1.4123e+08
Q8TBM8	DNAJB14	DnaJ homolog subfamily B member 14 OS=Homo sapiens GN=DNAJB14 PE=2 SV=1	9.23483	42.5		58256091	1.13561e+07	3.82265e+07	1.02352e+07	36285155		3.67592e+07	1.98382e+07
Q9UDY4	DNAJB4	DnaJ homolog subfamily B member 4 OS=Homo sapiens GN=DNAJB4 PE=1 SV=1	22.2552	37.8	35120498	5.89748e+07	5.16912e+07	34197624	3.07597e+08	6.20893e+07	5.95067e+07	1.48283e+07	6.99497e+07
O75190	DNAJB6	DnaJ homolog subfamily B member 6 OS=Homo sapiens GN=DNAJB6 PE=1 SV=2	20.2454	36.1	7.41377e+07	1.28818e+08	1.08924e+08	1.14281e+08	8.42109e+07		1.23297e+08	8.32344e+07	117216948
Q9UBS3	DNAJB9	DnaJ homolog subfamily B member 9 OS=Homo sapiens GN=DNAJB9 PE=1 SV=1	14.7982	25.5				2.80406e+07	3.13886e+07	24732286	6.86565e+06
Q96KC8	DNAJC1	DnaJ homolog subfamily C member 1 OS=Homo sapiens GN=DNAJC1 PE=1 SV=1	9.56679	63.8			6.44548e+07	9.00749e+07				4.63721e+07
Q8IXB1	DNAJC10	DnaJ homolog subfamily C member 10 OS=Homo sapiens GN=DNAJC10 PE=1 SV=2	42.623	91	405016667	6.55447e+08	3.65328e+08	3.21898e+08	2.95014e+08	3.29889e+08	3.12825e+08	2.05383e+08	2.89627e+08
Q9NVH1	DNAJC11	DnaJ homolog subfamily C member 11 OS=Homo sapiens GN=DNAJC11 PE=1 SV=2	47.9428	63.2	5.89369e+08	5.60356e+08	6.86404e+08	6.63618e+08	6.03891e+08	7.01695e+08	6.32476e+08	3.8439e+08	650918534
O75165	DNAJC13	DnaJ homolog subfamily C member 13 OS=Homo sapiens GN=DNAJC13 PE=1 SV=4	14.1329	254.3	2.73454e+07	5.23225e+07	4.65609e+07	4.28606e+07	3.96608e+07	4.13899e+07	4.5519e+07	2.03808e+07	2.30379e+08
Q9Y5T4	DNAJC15	DnaJ homolog subfamily C member 15 OS=Homo sapiens GN=DNAJC15 PE=1 SV=2	9.33333	16.4	7.31376e+07	65182978		6.56888e+07	5.0412e+07		1.86318e+07	41099728	28336807
Q9Y2G8	DNAJC16	DnaJ homolog subfamily C member 16 OS=Homo sapiens GN=DNAJC16 PE=2 SV=3	32.4808	90.5	6.6062e+07	9.38288e+07	9.26468e+07	7.44001e+07	73877813	6.63429e+07	5.26978e+07	3.15103e+07	7.68219e+07
Q9NVM6	DNAJC17	DnaJ homolog subfamily C member 17 OS=Homo sapiens GN=DNAJC17 PE=1 SV=1	33.8816	34.7	69702417	7.50456e+07	8.87697e+07	9.26594e+07	8.38127e+07	1.07417e+08	6.44969e+07	7.55655e+07	9.198e+07
Q96DA6	DNAJC19	Mitochondrial import inner membrane translocase subunit TIM14 OS=Homo sapiens GN=DNAJC19 PE=1 SV=3	32.7586	12.5	4.27473e+08	409978699		2.2081e+08	2.05977e+08	1.36683e+08	1.96511e+08	1.32744e+08	1.53086e+08
Q99543	DNAJC2	DnaJ homolog subfamily C member 2 OS=Homo sapiens GN=DNAJC2 PE=1 SV=3	28.1804	71.9	1.10575e+08	1.11367e+08	1.12069e+08	1.27129e+08	1.04611e+08	1.19903e+08	1.06429e+08	6.74909e+07	91576013
Q5F1R6	DNAJC21	DnaJ homolog subfamily C member 21 OS=Homo sapiens GN=DNAJC21 PE=1 SV=1	3.01318	62	1.94698e+07	2.27395e+07	8.13923e+06					9.43342e+06	1.15823e+07
Q9H1X3	DNAJC25	DnaJ homolog subfamily C member 25 OS=Homo sapiens GN=DNAJC25 PE=2 SV=1	11.1111	42.4	3.7475e+07	4.17582e+07	8.77374e+07	92717721	9.4687e+07	8.96477e+07	4.44838e+07
Q13217	DNAJC3	DnaJ homolog subfamily C member 3 OS=Homo sapiens GN=DNAJC3 PE=1 SV=1	52.5794	57.5	6.22692e+08	6.21841e+08	6.95123e+08	3.47089e+08	3.11265e+08	3.83293e+08	6.1802e+08	3.76629e+08	5.80196e+08
Q96LL9	DNAJC30	DnaJ homolog subfamily C member 30 OS=Homo sapiens GN=DNAJC30 PE=1 SV=3	16.8142	25.9			4.4932e+07	3.59485e+07	42572923	45022803	24066591		3.96114e+07
Q9H3Z4	DNAJC5	DnaJ homolog subfamily C member 5 OS=Homo sapiens GN=DNAJC5 PE=1 SV=1	41.4141	22.1	9.7869e+07	2.98478e+08	3.61619e+08	3.19101e+08	3.4179e+08	3.33664e+08	2.82157e+08	1.58593e+08	7.23129e+07
Q99615	DNAJC7	DnaJ homolog subfamily C member 7 OS=Homo sapiens GN=DNAJC7 PE=1 SV=2	36.0324	56.4	1.65123e+08	1.17142e+08	1.25011e+08	1.15746e+08	7.14621e+07	9.90055e+07	1.25315e+08	4.70787e+07	9.87045e+07
O75937	DNAJC8	DnaJ homolog subfamily C member 8 OS=Homo sapiens GN=DNAJC8 PE=1 SV=2	52.9644	29.8	5.60578e+08	5.41245e+08	5.88011e+08	7.24879e+08	7.30179e+08	6.648e+08	4.78112e+08	5.21874e+08	5.89398e+08
Q8WXX5	DNAJC9	DnaJ homolog subfamily C member 9 OS=Homo sapiens GN=DNAJC9 PE=1 SV=1	54.2308	29.9	5.12753e+08	4.52998e+08	5.14322e+08	4.67719e+08	4.35222e+08	4.92774e+08	3.89798e+08	2.96046e+08	4.24631e+08
O00115	DNASE2	Deoxyribonuclease-2-alpha OS=Homo sapiens GN=DNASE2 PE=1 SV=2	3.33333	39.6								7.48307e+07
Q5SXM8	DNLZ	DNL-type zinc finger protein OS=Homo sapiens GN=DNLZ PE=2 SV=1	8.42697	19.2	2.4664e+07		3.47269e+07						1.27205e+07
Q05193	DNM1	Dynamin-1 OS=Homo sapiens GN=DNM1 PE=1 SV=2	10.6481	97.3	566192643	5.67084e+08	592594468	523106867	5.30287e+08		491789528	379476837	576109721
O00429	DNM1L	Dynamin-1-like protein OS=Homo sapiens GN=DNM1L PE=1 SV=2	60.5978	81.8	2.3235e+08	2.29191e+08	2.76917e+08	2.09151e+08	1.78693e+08	2.23377e+08	1.7896e+08	1.23769e+08	2.0532e+08
P50570	DNM2	Dynamin-2 OS=Homo sapiens GN=DNM2 PE=1 SV=2	54.4828	98	6.02538e+08	6.06917e+08	670138178	5.6436e+08	5.74576e+08	5.58699e+08	5.6046e+08	405872137	5.9054e+08
Q9UQ16	DNM3	Dynamin-3 OS=Homo sapiens GN=DNM3 PE=1 SV=4	10.0115	97.7	3.18523e+08	422939060	436427412	3.3912e+08	3.5522e+08	3.24356e+08	2.93598e+08	1.77352e+08	4.52544e+08
Q6XZF7	DNMBP	Dynamin-binding protein OS=Homo sapiens GN=DNMBP PE=1 SV=1	1.39505	177.2		7.96969e+06
P26358	DNMT1	DNA (cytosine-5)-methyltransferase 1 OS=Homo sapiens GN=DNMT1 PE=1 SV=2	33.9109	183.1	2.98252e+08	3.14065e+08	3.38709e+08	2.5115e+08	2.82315e+08	2.63921e+08	3.00211e+08	1.76907e+08	3.13987e+08
Q9Y6K1	DNMT3A	DNA (cytosine-5)-methyltransferase 3A OS=Homo sapiens GN=DNMT3A PE=1 SV=4	24.8904	101.8	5.19549e+07	5.27764e+07	7.0079e+07	3.5147e+07	4.68638e+07	5.36288e+07	7.03072e+07	4.05346e+07	8.02956e+07
Q9UBC3	DNMT3B	DNA (cytosine-5)-methyltransferase 3B OS=Homo sapiens GN=DNMT3B PE=1 SV=1	7.26846	95.7	1.79318e+07	1.7348e+07	3.89946e+07		2.14028e+07	1.93955e+07	7.24123e+06	1.28811e+07	2.86128e+07
Q9ULA0	DNPEP	Aspartyl aminopeptidase OS=Homo sapiens GN=DNPEP PE=1 SV=1	44.2105	52.4	2.89913e+08	2.90288e+08	3.41603e+08	3.75673e+08	351111836	3.5239e+08	3.14711e+08	1.39152e+08	3.32407e+08
O43598	DNPH1	Deoxyribonucleoside 5'-monophosphate N-glycosidase OS=Homo sapiens GN=RCL PE=1 SV=1	57.4713	19.1	9.5303e+07	1.52286e+08	1.6085e+08	2.19281e+08	1.98086e+08	1.94106e+08	1.33281e+08	1.12827e+08	2.35776e+08
Q9H147	DNTTIP1	Deoxynucleotidyltransferase terminal-interacting protein 1 OS=Homo sapiens GN=DNTTIP1 PE=1 SV=2	17.9331	37	5.96502e+07	5.26846e+07	5.8071e+07	3.57673e+07	3.23366e+07		48276814	2.35148e+07	4.76449e+07
Q5QJE6	DNTTIP2	Deoxynucleotidyltransferase terminal-interacting protein 2 OS=Homo sapiens GN=DNTTIP2 PE=1 SV=2	39.418	84.4	2.0202e+08	4.30202e+08	4.04057e+08	3.94422e+08	3.18619e+08	3.80836e+08	4.49059e+08	2.57466e+08	3.69413e+08
Q14185	DOCK1	Dedicator of cytokinesis protein 1 OS=Homo sapiens GN=DOCK1 PE=1 SV=2	6.97051	215.2	1.40837e+07	1.59922e+07	3.01044e+07	3.81924e+07	3.33658e+07
Q92608	DOCK2	Dedicator of cytokinesis protein 2 OS=Homo sapiens GN=DOCK2 PE=1 SV=2	1.5847	211.8		4.94948e+09	6.5725e+10	86516907302	76423719354			4.14579e+08	461300016
Q8N1I0	DOCK4	Dedicator of cytokinesis protein 4 OS=Homo sapiens GN=DOCK4 PE=1 SV=2	6.96846	225	1.53524e+07	2.32055e+07	2.97924e+07	1.60434e+07	1.96251e+07	2.71561e+07	1.5417e+07	5.08662e+06	2.6408e+07
Q9H7D0	DOCK5	Dedicator of cytokinesis protein 5 OS=Homo sapiens GN=DOCK5 PE=1 SV=3	4.33155	215.2								2.54226e+07	2.94349e+06
Q96HP0	DOCK6	Dedicator of cytokinesis protein 6 OS=Homo sapiens GN=DOCK6 PE=1 SV=2	3.7616	229.5	3.3683e+07	9.54405e+06		33874151	9.8034e+06	41698464	1.4922e+07	1.59591e+08
Q96N67	DOCK7	Dedicator of cytokinesis protein 7 OS=Homo sapiens GN=DOCK7 PE=1 SV=4	21.1682	242.4	1.33372e+08	8.45199e+07	8.77216e+07	5.30882e+07	5.87714e+07	6.36866e+07	8.12767e+07	5.32948e+07	8.89564e+07
Q9BU89	DOHH	Deoxyhypusine hydroxylase OS=Homo sapiens GN=DOHH PE=1 SV=1	57.2848	32.9	7.32271e+07	6.32033e+07	8.36211e+07	87482087	7.20333e+07	6.5627e+07	7.67689e+07	4.32154e+07	7.22675e+07
Q9UPQ8	DOLK	Dolichol kinase OS=Homo sapiens GN=DOLK PE=1 SV=1	4.08922	59.2	3.8789e+07	48928233	6.40152e+07
Q86YN1	DOLPP1	Dolichyldiphosphatase 1 OS=Homo sapiens GN=DOLPP1 PE=1 SV=1	15.5462	27	1.44175e+08	1.56442e+08	1.97868e+08	1.64322e+08	1.26083e+08	1.70852e+08	1.22665e+08	6.07452e+07	1.57354e+08
Q9Y3R5	DOP1B	Protein dopey-2 OS=Homo sapiens GN=DOPEY2 PE=1 SV=4	2.21932	258	1.33472e+07	1.36298e+07	1.58835e+07		9.79662e+06			6.23193e+06	8.68937e+06
Q9H3H5	DPAGT1	UDP-N-acetylglucosamine--dolichyl-phosphate N-acetylglucosaminephosphotransferase OS=Homo sapiens GN=DPAGT1 PE=1 SV=2	11.0294	46.1	4.38241e+07	33383566	63322335	3.26e+07	4.84855e+07	49402806	3.86434e+07	2.11683e+07	62915624
Q9BVM2	DPCD	Protein DPCD OS=Homo sapiens GN=DPCD PE=1 SV=2	4.92611	23.2	27091378	2.63843e+07	22614150		2.83872e+07		27666293		2.99329e+07
P16444	DPEP1	Dipeptidase 1 OS=Homo sapiens GN=DPEP1 PE=1 SV=3	64.7202	45.6	9.53895e+08	9.31246e+08	1099298242	8.8068e+08	9.66636e+08	1.06309e+09	9.30959e+08	5.30183e+08	8.4014e+08
Q92785	DPF2	Zinc finger protein ubi-d4 OS=Homo sapiens GN=DPF2 PE=1 SV=2	58.8235	44.1	1.56504e+08	2.03744e+08	2.85088e+08	1.86015e+08	2.03733e+08	1.88788e+08	1.44428e+08	2.19647e+08	218129384
Q9BZG8	DPH1	Diphthamide biosynthesis protein 1 OS=Homo sapiens GN=DPH1 PE=1 SV=2	19.6388	48.8	2.26798e+07	4.63463e+07	4.49312e+07	2.81889e+07	21281249	1.99026e+07	1.65888e+07	2.54165e+07	2.1968e+07
Q9BQC3	DPH2	Diphthamide biosynthesis protein 2 OS=Homo sapiens GN=DPH2 PE=1 SV=1	26.7894	52.1	5.45868e+07	4.53166e+07	5.54385e+07	5.86871e+07	5.60273e+07	6.50158e+07	3.15175e+07	2.18554e+07	4.24894e+07
Q9H2P9	DPH5	Diphthine synthase OS=Homo sapiens GN=DPH5 PE=1 SV=2	31.9298	31.6	5.58852e+07			4.58569e+07	2.53426e+07	3.73435e+07	3.55252e+07	2.41073e+07	54178891
Q7L8W6	DPH6	ATP-binding domain-containing protein 4 OS=Homo sapiens GN=ATPBD4 PE=1 SV=2	10.4869	30.3
O60762	DPM1	Dolichol-phosphate mannosyltransferase OS=Homo sapiens GN=DPM1 PE=1 SV=1	66.1538	29.6	6.40426e+08	5.66472e+08	6.33526e+08	5.34985e+08	6.02259e+08	6.28329e+08	4.47329e+08	3.77505e+08	4.68102e+08
Q9P2X0	DPM3	Dolichol-phosphate mannosyltransferase subunit 3 OS=Homo sapiens GN=DPM3 PE=1 SV=2	23.913	10.1				268232522	226181334	4.64655e+07	21335224	1.90498e+08	1.38025e+08
Q9NY33	DPP3	Dipeptidyl peptidase 3 OS=Homo sapiens GN=DPP3 PE=1 SV=2	56.038	82.5	2.68001e+08	2.55862e+08	3.141e+08	2.29382e+08	2.11885e+08	2.64466e+08	2.81379e+08	1.72667e+08	2.3512e+08
Q86TI2	DPP9	Dipeptidyl peptidase 9 OS=Homo sapiens GN=DPP9 PE=1 SV=3	25.8401	98.2	5.31903e+07	5.8047e+07	8.26421e+07	1.00945e+08	9.81722e+07	9.75317e+07	8.67715e+07	4.0938e+07	7.6106e+07
Q2PZI1	DPY19L1	Protein dpy-19 homolog 1 OS=Homo sapiens GN=DPY19L1 PE=2 SV=1	21.4815	77.3	88938287	5.16489e+07	3.59515e+07	3.62206e+07	1.32137e+07	2.16803e+07	2.79927e+07	1.91228e+07	1.58304e+07
Q6ZPD9	DPY19L3	Protein dpy-19 homolog 3 OS=Homo sapiens GN=DPY19L3 PE=2 SV=1	3.07263	83.1	4.43515e+06						1.17042e+08
Q7Z388	DPY19L4	Protein dpy-19 homolog 4 OS=Homo sapiens GN=DPY19L4 PE=2 SV=1	1.24481	83.7
Q9C005	DPY30	Protein dpy-30 homolog OS=Homo sapiens GN=DPY30 PE=1 SV=1	56.5657	11.2	6.01191e+08	6.66417e+08	7.22097e+08	6.95932e+08	6.37767e+08	7.54601e+08	6.91541e+08	3.57089e+08	7.19845e+08
Q16555	DPYSL2	Dihydropyrimidinase-related protein 2 OS=Homo sapiens GN=DPYSL2 PE=1 SV=1	71.3287	62.3	6.99878e+08	7.08234e+08	8.17442e+08	6.87324e+08	689914527	7.76297e+08	7.0812e+08	5.30796e+08	8.16445e+08
Q8TE96	DQX1	ATP-dependent RNA helicase DQX1 OS=Homo sapiens GN=DQX1 PE=2 SV=2	7.67085	79.4	1.07561e+07	1.23047e+07	7.6209e+06	7.76133e+06		1.07759e+07	10236022		14993954
Q01658	DR1	Protein Dr1 OS=Homo sapiens GN=DR1 PE=1 SV=1	42.6136	19.4	2.02801e+08	2.58944e+08	3.30483e+08	2.51563e+08	209181909	2.67496e+08	1.53189e+08	3.11399e+07	1.94198e+08
Q14919	DRAP1	Dr1-associated corepressor OS=Homo sapiens GN=DRAP1 PE=1 SV=3	32.6829	22.3	1.82565e+08	1.81601e+08	212508784	94394405	2.40058e+08	1.77846e+08	2.16925e+08	1.00521e+08	1.79578e+08
Q9Y295	DRG1	Developmentally-regulated GTP-binding protein 1 OS=Homo sapiens GN=DRG1 PE=1 SV=1	43.0518	40.5	5.2002e+08	4.765e+08	5.46748e+08	4.86954e+08	5.03244e+08	5.18514e+08	492184107	326012338	4.73899e+08
P55039	DRG2	Developmentally-regulated GTP-binding protein 2 OS=Homo sapiens GN=DRG2 PE=1 SV=1	30.7692	40.7	1.87093e+08	1.65311e+08	1.87576e+08	1.57814e+08	1.70198e+08	1.76066e+08	165713503	1.04919e+08	1.85467e+08
Q9NRR4	DROSHA	Ribonuclease 3 OS=Homo sapiens GN=RNASEN PE=1 SV=2	2.62009	159.2				2.07203e+07			1.95126e+07	6.37557e+06	2.55731e+07
Q08554	DSC1	Desmocollin-1 OS=Homo sapiens GN=DSC1 PE=1 SV=2	1.67785	99.9
Q02487	DSC2	Desmocollin-2 OS=Homo sapiens GN=DSC2 PE=1 SV=1	11.6537	99.9	24819353	3.08495e+07	20461355	17380256		26223156	1.81497e+07	176831138	2.30007e+07
Q9BVC3	DSCC1	Sister chromatid cohesion protein DCC1 OS=Homo sapiens GN=DSCC1 PE=1 SV=2	12.7226	44.8					1.36263e+07			1.00843e+07
Q02413	DSG1	Desmoglein-1 OS=Homo sapiens GN=DSG1 PE=1 SV=1	1.81125	113.6
Q14126	DSG2	Desmoglein-2 OS=Homo sapiens GN=DSG2 PE=1 SV=2	50.2683	122.2	6.18978e+08	4.05674e+08	5.79589e+08	5.53589e+08	5.37418e+08	5.86973e+08	5.62058e+08	3.61177e+08	4.79512e+08
Q9H410	DSN1	Kinetochore-associated protein DSN1 homolog OS=Homo sapiens GN=DSN1 PE=1 SV=2	21.3483	40	2.5231e+06	1.22235e+07	2.74395e+07		14548397
P15924	DSP	Desmoplakin OS=Homo sapiens GN=DSP PE=1 SV=3	60.3622	331.6	2.67884e+09	2.64124e+09	3.01833e+09	2.37736e+09	2.26828e+09	2.48039e+09	2.40923e+09	1.46051e+09	1.84722e+09
O94833	DST	Bullous pemphigoid antigen 1, isoforms 6/9/10 OS=Homo sapiens GN=DST PE=1 SV=3	2.63005	590.6	5.21263e+06		27697150
Q03001	DST	Bullous pemphigoid antigen 1, isoforms 1/2/3/4/5/8 (Fragment) OS=Homo sapiens GN=DST PE=1 SV=3	2.64468	372	4.2119e+06		4816743			4.06985e+06			4.62044e+06
Q8WXK8	DST	Bullous pemphigoid antigen 1, isoform 7 (Fragment) OS=Homo sapiens GN=DST PE=1 SV=1	2.54902	344.8	2.41579e+07	1.75629e+07		1.76361e+07	1.80891e+07	26515676	2.11998e+07	1.13088e+07
P60981	DSTN	Destrin OS=Homo sapiens GN=DSTN PE=1 SV=3	55.1515	18.5	7.21155e+08	7.7956e+08	7.83113e+08	8.05594e+08	7.80202e+08	877583662	7.46999e+08	4.45054e+08	857438291
Q8TEA8	DTD1	D-tyrosyl-tRNA(Tyr) deacylase 1 OS=Homo sapiens GN=DTD1 PE=1 SV=2	50.7177	23.4	5.28972e+08	5.33548e+08	6.2028e+08	5.31347e+08	4.94614e+08	5.6347e+08	2.30151e+08	3.05869e+08	2.63455e+08
Q96FN9	DTD2	Probable D-tyrosyl-tRNA(Tyr) deacylase 2 OS=Homo sapiens GN=C14orf126 PE=2 SV=1	13.0952	18.6							2.36718e+07	1.09387e+07
O60941	DTNB	Dystrobrevin beta OS=Homo sapiens GN=DTNB PE=1 SV=1	15.63	71.3	3.24669e+07		2.87486e+07	1.61999e+07		54806132	7.71588e+06
Q96EV8	DTNBP1	Dysbindin OS=Homo sapiens GN=DTNBP1 PE=1 SV=1	6.83761	39.5	1.97411e+07	2.88198e+07	2.84659e+07
Q8TDB6	DTX3L	E3 ubiquitin-protein ligase DTX3L OS=Homo sapiens GN=DTX3L PE=1 SV=1	9.32432	83.5	1.24456e+07		25770841				15819235	9.90804e+06
P23919	DTYMK	Thymidylate kinase OS=Homo sapiens GN=DTYMK PE=1 SV=4	67.4528	23.8	387191293	4.00022e+08	4.41667e+08	432448834	3.94155e+08	4.22581e+08	4.01219e+08	2.64475e+08	4.41123e+08
Q6P1R4	DUS1L	tRNA-dihydrouridine synthase 1-like OS=Homo sapiens GN=DUS1L PE=1 SV=1	13.5307	53.2	2.63022e+07	2.52091e+07		4.29761e+07	4.5557e+07	3.00166e+07	3.21205e+07		3.41891e+07
Q9NX74	DUS2	tRNA-dihydrouridine synthase 2-like OS=Homo sapiens GN=DUS2L PE=1 SV=1	15.213	55	2.6267e+07	2.46767e+07	34629641		7.35957e+06		1.76858e+07	1.13376e+07	13737513
Q96G46	DUS3L	tRNA-dihydrouridine synthase 3-like OS=Homo sapiens GN=DUS3L PE=1 SV=2	22.9231	72.5		17256222	2.90182e+07	12186223	3.48417e+07	4.48697e+07	28574962		1.2431e+07
O75319	DUSP11	RNA/RNP complex-1-interacting phosphatase OS=Homo sapiens GN=DUSP11 PE=1 SV=1	33.3333	38.9	5.99935e+07	8.62326e+07	21273475			9.05617e+07	8.7311e+07	4.94401e+07	1.46245e+07
Q9UNI6	DUSP12	Dual specificity protein phosphatase 12 OS=Homo sapiens GN=DUSP12 PE=1 SV=1	22.3529	37.7		45508349	3.88657e+07		3.08043e+07		43856095	3.55215e+07
O95147	DUSP14	Dual specificity protein phosphatase 14 OS=Homo sapiens GN=DUSP14 PE=1 SV=1	21.2121	22.2							7.94026e+06
P51452	DUSP3	Dual specificity protein phosphatase 3 OS=Homo sapiens GN=DUSP3 PE=1 SV=1	44.3243	20.5	1.64448e+08	1.61731e+08	2.46895e+08	2.11562e+08	1.03645e+08	1.32703e+08	2.36415e+08	1.20621e+08	2.53814e+08
Q16828	DUSP6	Dual specificity protein phosphatase 6 OS=Homo sapiens GN=DUSP6 PE=1 SV=2	19.1601	42.3
Q99956	DUSP9	Dual specificity protein phosphatase 9 OS=Homo sapiens GN=DUSP9 PE=1 SV=1	61.7188	41.8	2.16561e+08	2.31633e+08	2.85238e+08	1.05649e+08	1.29918e+08	2.15063e+08	4.13169e+08	1.83396e+08	8.10829e+08
P33316	DUT	Deoxyuridine 5'-triphosphate nucleotidohydrolase, mitochondrial OS=Homo sapiens GN=DUT PE=1 SV=3	49.6032	26.7	3.95384e+08	4.40979e+08	4.86069e+08	3.85355e+08	3.89163e+08	4.46494e+08	4.98869e+08	3.1056e+08	4.63144e+08
O14640	DVL1	Segment polarity protein dishevelled homolog DVL-1 OS=Homo sapiens GN=DVL1 PE=1 SV=2	7.48201	75.1							4.3853e+06
O14641	DVL2	Segment polarity protein dishevelled homolog DVL-2 OS=Homo sapiens GN=DVL2 PE=1 SV=1	7.20109	78.9
Q92997	DVL3	Segment polarity protein dishevelled homolog DVL-3 OS=Homo sapiens GN=DVL3 PE=1 SV=2	7.40223	78				5.28542e+06	5.44947e+06				7659172
O77932	DXO	Protein Dom3Z OS=Homo sapiens GN=DOM3Z PE=1 SV=2	8.08081	44.9			1.86648e+07
Q7RTS9	DYM	Dymeclin OS=Homo sapiens GN=DYM PE=1 SV=1	2.84006	75.9			13870751					8.68079e+06
Q14204	DYNC1H1	Cytoplasmic dynein 1 heavy chain 1 OS=Homo sapiens GN=DYNC1H1 PE=1 SV=5	60.1808	532.1	8.5247e+08	8.96413e+08	9.06189e+08	9.64498e+08	1.07866e+09	8.65223e+08	694741511	4.50103e+08	742724803
Q13409	DYNC1I2	Cytoplasmic dynein 1 intermediate chain 2 OS=Homo sapiens GN=DYNC1I2 PE=1 SV=3	41.0658	71.4	4.76578e+08	4.84802e+08	5.05865e+08	5.66277e+08	4.5805e+08	3.76975e+08	3.67487e+08	2.23209e+08	3.70106e+08
Q9Y6G9	DYNC1LI1	Cytoplasmic dynein 1 light intermediate chain 1 OS=Homo sapiens GN=DYNC1LI1 PE=1 SV=3	49.7132	56.5	2.42014e+08	2.7515e+08	3.1752e+08	3.11714e+08	3.30818e+08	2.98783e+08	2.21062e+08	165513000	1.6984e+08
O43237	DYNC1LI2	Cytoplasmic dynein 1 light intermediate chain 2 OS=Homo sapiens GN=DYNC1LI2 PE=1 SV=1	44.3089	54.1	2.77681e+08	2.11146e+08	2.2819e+08	1.578e+08	1.73195e+08	2.07162e+08	1.54955e+08	9.21897e+07	2.08488e+08
P63167	DYNLL1	Dynein light chain 1, cytoplasmic OS=Homo sapiens GN=DYNLL1 PE=1 SV=1	49.4382	10.4	1.43279e+09	1463454545	1757627215	2.19055e+09	1973143420	1881965698	1403870794	1.514e+09	1.71059e+09
Q96FJ2	DYNLL2	Dynein light chain 2, cytoplasmic OS=Homo sapiens GN=DYNLL2 PE=1 SV=1	49.4382	10.3	335447744	376347413	407836467	153821905	3.77162e+08	231743420	2.8579e+08	231645520	377401898
Q9NP97	DYNLRB1	Dynein light chain roadblock-type 1 OS=Homo sapiens GN=DYNLRB1 PE=1 SV=3	60.4167	10.9	9.45909e+08	1.0904e+09	5.2057e+08	1.18248e+09	524271672	5.77065e+08	5.09465e+08	3.4215e+08	4.33504e+08
P63172	DYNLT1	Dynein light chain Tctex-type 1 OS=Homo sapiens GN=DYNLT1 PE=1 SV=1	30.0885	12.4	2.99525e+08	255021984	394035192	2.70496e+08	2.45842e+08	2.98144e+08	2.36463e+08	1.37313e+08	2.13184e+08
P51808	DYNLT3	Dynein light chain Tctex-type 3 OS=Homo sapiens GN=DYNLT3 PE=1 SV=1	14.6552	13.1		3.55379e+07
O00716	E2F3	Transcription factor E2F3 OS=Homo sapiens GN=E2F3 PE=1 SV=1	2.15054	49.1
O75461	E2F6	Transcription factor E2F6 OS=Homo sapiens GN=E2F6 PE=1 SV=1	7.11744	31.8		4.03228e+06
Q96JC9	EAF1	ELL-associated factor 1 OS=Homo sapiens GN=EAF1 PE=1 SV=1	14.5522	29			24295952			4.41864e+06			1.09033e+07
Q56P03	EAPP	E2F-associated phosphoprotein OS=Homo sapiens GN=EAPP PE=1 SV=3	12.6316	32.7	1.25639e+08	2.68699e+07	1.35077e+09	2.08573e+08	213617452	206014710	5.1801e+07	1739313809	267997270
Q5JPH6	EARS2	Probable glutamyl-tRNA synthetase, mitochondrial OS=Homo sapiens GN=EARS2 PE=1 SV=2	55.6405	58.7	403816259	3.92499e+08	4.5586e+08	4.21006e+08	3.56944e+08	4.64753e+08	4.7591e+08	2.56817e+08	4.27545e+08
O00559	EBAG9	Receptor-binding cancer antigen expressed on SiSo cells OS=Homo sapiens GN=EBAG9 PE=1 SV=1	8.92019	24.4	41790775	51038818		3.92992e+07	5.729e+07	45870569	46258700	39174206
Q99848	EBNA1BP2	Probable rRNA-processing protein EBP2 OS=Homo sapiens GN=EBNA1BP2 PE=1 SV=2	37.9085	34.8	8.52974e+08	8.99857e+08	8.58883e+08	7.23729e+08	7.02699e+08	7.39195e+08	7.09125e+08	5.02882e+08	6.4888e+08
Q15125	EBP	3-beta-hydroxysteroid-Delta(8),Delta(7)-isomerase OS=Homo sapiens GN=EBP PE=1 SV=3	16.5217	26.3	2.06901e+09	9.69071e+08	9.79065e+08	7.63153e+08	1.1055e+09	1035566282	9.89857e+08	6.35148e+08	1.18728e+09
O95905	ECD	Protein SGT1 OS=Homo sapiens GN=ECD PE=1 SV=1	12.4224	72.7		1.80737e+07	3.96383e+07			2.88151e+06			3.4266e+06
P42892	ECE1	Endothelin-converting enzyme 1 OS=Homo sapiens GN=ECE1 PE=1 SV=2	34.5455	87.1	2.06249e+08	1.98415e+08	4.09501e+08	3.21977e+08	1.68999e+08	223057551	3.3545e+08	1.27129e+08	2.15805e+08
O60344	ECE2	Endothelin-converting enzyme 2 OS=Homo sapiens GN=ECE2 PE=1 SV=4	2.26501	99.7
Q13011	ECH1	Delta(3,5)-Delta(2,4)-dienoyl-CoA isomerase, mitochondrial OS=Homo sapiens GN=ECH1 PE=1 SV=2	54.5732	35.8	3.03268e+09	3.20458e+09	3.98395e+09	3.10413e+09	2.95644e+09	3.17659e+09	3.0771e+09	1.81349e+09	3.434e+09
Q9NTX5	ECHDC1	Enoyl-CoA hydratase domain-containing protein 1 OS=Homo sapiens GN=ECHDC1 PE=1 SV=2	58.6319	33.7	3.17619e+08	295715632	3.27323e+08	2.75916e+08	2.74386e+08	2.67639e+08	2.75075e+08	2.24302e+08	2.76208e+08
P30084	ECHS1	Enoyl-CoA hydratase, mitochondrial OS=Homo sapiens GN=ECHS1 PE=1 SV=4	67.2414	31.4	4.76264e+09	4.49056e+09	5006285986	4999464938	3.96218e+09	4.28075e+09	4.34735e+09	2.66214e+09	4.25609e+09
P42126	ECI1	3,2-trans-enoyl-CoA isomerase, mitochondrial OS=Homo sapiens GN=DCI PE=1 SV=1	35.4305	32.8	3.88674e+09	3.71456e+09	3218624564	3.26141e+09	2.96973e+09	3.26147e+09	2.96974e+09	2.28886e+09	3.12882e+09
O75521	ECI2	Peroxisomal 3,2-trans-enoyl-CoA isomerase OS=Homo sapiens GN=PECI PE=1 SV=4	56.599	43.6	1.60342e+09	1.3621e+09	1.4793e+09	1.20423e+09	1.37152e+09	1.39476e+09	1.35628e+09	8.15172e+08	1.43018e+09
Q5VYK3	ECPAS	Proteasome-associated protein ECM29 homolog OS=Homo sapiens GN=ECM29 PE=1 SV=2	38.3198	204.2	2.05958e+08	2.12249e+08	2.31206e+08	1.98358e+08	1.7653e+08	2.30366e+08	2.19156e+08	1.52506e+08	2.20884e+08
Q9BQ95	ECSIT	Evolutionarily conserved signaling intermediate in Toll pathway, mitochondrial OS=Homo sapiens GN=ECSIT PE=1 SV=1	41.7633	49.1	1.52943e+08	1.45485e+08	1.97161e+08	2.18663e+08	190471199	2.18563e+08	1.82157e+08	1.08136e+08	1.8567e+08
Q9H8V3	ECT2	Protein ECT2 OS=Homo sapiens GN=ECT2 PE=1 SV=3	14.043	100	23959107	3.88655e+07	3.63526e+07	3.26249e+07	2.714e+07	4.15509e+07	2.3041e+07	1.00572e+07	33134237
Q96F86	EDC3	Enhancer of mRNA-decapping protein 3 OS=Homo sapiens GN=EDC3 PE=1 SV=1	33.4646	56	9.15524e+07	1.31485e+08	1.53967e+08	146570544	1.21328e+08	1.47116e+08	1.01337e+08	2.55182e+07	1.48284e+08
Q6P2E9	EDC4	Enhancer of mRNA-decapping protein 4 OS=Homo sapiens GN=EDC4 PE=1 SV=1	43.8258	151.6	3.54976e+08	2.5949e+08	4.13588e+08	1.86678e+08	1.98496e+08	2.30928e+08	1.79139e+08	1.31477e+08	1.95431e+08
Q92611	EDEM1	ER degradation-enhancing alpha-mannosidase-like 1 OS=Homo sapiens GN=EDEM1 PE=1 SV=1	5.02283	73.7
Q9BV94	EDEM2	ER degradation-enhancing alpha-mannosidase-like 2 OS=Homo sapiens GN=EDEM2 PE=1 SV=2	18.8581	64.7	2.59279e+07	3.58513e+07	2.95573e+07					2.34883e+07	5949465
Q9BZQ6	EDEM3	ER degradation-enhancing alpha-mannosidase-like 3 OS=Homo sapiens GN=EDEM3 PE=1 SV=2	12.7682	104.6	8.27372e+06	7.11202e+06	2.00343e+07	34454375	3.9559e+07	3.18528e+07	3.98607e+07	2.87409e+06
O60869	EDF1	Endothelial differentiation-related factor 1 OS=Homo sapiens GN=EDF1 PE=1 SV=1	41.2162	16.4	7.21897e+08	1.01525e+09	6.94697e+08	5.58738e+08	5.21555e+08	3.90333e+08	3.18848e+08	3.57536e+08	6.49495e+08
Q3B7T1	EDRF1	Erythroid differentiation-related factor 1 OS=Homo sapiens GN=EDRF1 PE=1 SV=1	2.10016	138.4	8.30734e+06	9747814		1.27357e+07	8.02574e+06			2.15662e+06	9.62258e+06
Q15075	EEA1	Early endosome antigen 1 OS=Homo sapiens GN=EEA1 PE=1 SV=2	34.0184	162.4	4.21735e+08	4.60999e+08	3.68532e+08	1.39374e+08	1.5726e+08	1.50086e+08	1.35118e+08	8.80635e+07	1.27492e+08
O75530	EED	Polycomb protein EED OS=Homo sapiens GN=EED PE=1 SV=2	29.7052	50.2	1.03049e+08	1.05189e+08	1.09934e+08	8.38688e+07	8.96345e+07	92311108	7.13247e+07	5.20709e+07	9.58212e+07
P68104	EEF1A1	Elongation factor 1-alpha 1 OS=Homo sapiens GN=EEF1A1 PE=1 SV=1	72.7273	50.1	3.61206e+10	3.91304e+10	3.36875e+10	3.31495e+10	3.26548e+10	4.25246e+10	3.84142e+10	2.46656e+10	3.03114e+10
Q05639	EEF1A2	Elongation factor 1-alpha 2 OS=Homo sapiens GN=EEF1A2 PE=1 SV=1	59.6112	50.4	218970407	2.18741e+08	2.99021e+08	1.09853e+08	1.12978e+08	2.46207e+08	2.18614e+08	1.44377e+08	5.31303e+08
Q8WVE0	EEF1AKMT1	N(6)-adenine-specific DNA methyltransferase 2 OS=Homo sapiens GN=N6AMT2 PE=1 SV=1	6.07477	24.5
Q5JPI9	EEF1AKMT2	Methyltransferase-like protein 10 OS=Homo sapiens GN=METTL10 PE=1 SV=2	14.433	31.8
Q8N6R0	EEF1AKNMT	Methyltransferase-like protein 13 OS=Homo sapiens GN=METTL13 PE=1 SV=1	22.7468	78.7	3.86554e+07		154088984	2.69186e+07	5.31689e+07	3.78457e+07	5.28218e+07	1.58042e+07	1.34752e+07
P24534	EEF1B2	Elongation factor 1-beta OS=Homo sapiens GN=EEF1B2 PE=1 SV=3	70.2222	24.7	5.58002e+09	5.33043e+09	5.73357e+09	5576105614	5.56711e+09	6.02965e+09	3.98315e+09	2.76946e+09	4.10952e+09
P29692	EEF1D	Elongation factor 1-delta OS=Homo sapiens GN=EEF1D PE=1 SV=5	66.1922	31.1	2518959888	2.45682e+09	2852483104	2.64963e+09	2.46669e+09	2.57272e+09	1.93026e+09	1171764576	1.63724e+09
O43324	EEF1E1	Eukaryotic translation elongation factor 1 epsilon-1 OS=Homo sapiens GN=EEF1E1 PE=1 SV=1	43.1034	19.8	3.0328e+08	2.82315e+08	2.3238e+08	4.68445e+08	3.89636e+08	4.18403e+08	395301265	2.6227e+08	3.12736e+08
P26641	EEF1G	Elongation factor 1-gamma OS=Homo sapiens GN=EEF1G PE=1 SV=3	73.2265	50.1	3.99777e+09	3802559230	4.41398e+09	4.64801e+09	4.3461e+09	4.43718e+09	3.10017e+09	2.06337e+09	3146985168
P13639	EEF2	Elongation factor 2 OS=Homo sapiens GN=EEF2 PE=1 SV=4	74.5921	95.3	7.37368e+09	7.1399e+09	8.25135e+09	6847917870	6.61282e+09	7.10227e+09	8.0746e+09	4.70099e+09	8.8819e+09
O00418	EEF2K	Eukaroytic elongation factor 2 kinase OS=Homo sapiens GN=EEF2K PE=1 SV=2	13.7931	82.1	2.10804e+07		1.7033e+07		4.39513e+07	73551127	3.07757e+07
P57772	EEFSEC	Selenocysteine-specific elongation factor OS=Homo sapiens GN=EEFSEC PE=1 SV=4	21.1409	65.3	5.02819e+07	30574878	3.98345e+07	4.6734e+07	3.36724e+07	3.47955e+07	4.10799e+07		7.58607e+07
Q7L9B9	EEPD1	Endonuclease/exonuclease/phosphatase family domain-containing protein 1 OS=Homo sapiens GN=EEPD1 PE=1 SV=1	12.6538	62.4	1.93319e+08	3.09883e+07	3.39102e+07	2.62402e+07	1.91393e+07	25788648			19572513
Q96C19	EFHD2	EF-hand domain-containing protein D2 OS=Homo sapiens GN=EFHD2 PE=1 SV=1	39.5833	26.7	3.52819e+08	3.51643e+08	3.45128e+08	3.0546e+08	2.79897e+08	3.08262e+08	4.14438e+08	2.05543e+08	349189300
Q7Z2Z2	EFL1	Elongation factor Tu GTP-binding domain-containing protein 1 OS=Homo sapiens GN=EFTUD1 PE=1 SV=2	15.0893	125.4	2.37644e+07	92822526	3.57831e+07	1.05229e+07	8.53791e+06	3.10648e+07	5.27932e+07	1.14684e+07	3.46683e+07
P98172	EFNB1	Ephrin-B1 OS=Homo sapiens GN=EFNB1 PE=1 SV=1	5.78035	38
Q14156	EFR3A	Protein EFR3 homolog A OS=Homo sapiens GN=EFR3A PE=1 SV=2	11.9367	92.9	2.77635e+07	3.12941e+07	5.09872e+08		4.44358e+06	1.81553e+07	3.23197e+07		4.06977e+07
Q15029	EFTUD2	116 kDa U5 small nuclear ribonucleoprotein component OS=Homo sapiens GN=EFTUD2 PE=1 SV=1	70.679	109.4	1754468950	1.65904e+09	1.60339e+09	1.6012e+09	1.57457e+09	1.57796e+09	1.6535e+09	1.01215e+09	1.75554e+09
Q9GZT9	EGLN1	Egl nine homolog 1 OS=Homo sapiens GN=EGLN1 PE=1 SV=1	24.1784	46	5.64088e+07	5.40565e+07	5.68047e+07	21616807	4.99891e+07		4.67731e+07	2.45882e+07	3.48948e+07
Q8NDI1	EHBP1	EH domain-binding protein 1 OS=Homo sapiens GN=EHBP1 PE=1 SV=3	29.8132	139.9	93289241	9.74721e+07	9.96288e+07	1.10491e+08	8.91518e+07	3.21473e+08	8.8094e+07	6.7745e+07	8.21214e+07
Q8N3D4	EHBP1L1	EH domain-binding protein 1-like protein 1 OS=Homo sapiens GN=EHBP1L1 PE=1 SV=2	2.69206	161.8	7.56212e+06	7.06032e+06	9.97014e+06	1.22632e+07	7.17323e+06	7.70189e+06		3.15392e+06	8.44642e+06
Q9H4M9	EHD1	EH domain-containing protein 1 OS=Homo sapiens GN=EHD1 PE=1 SV=2	77.1536	60.6	4.72112e+08	5.04468e+08	5.22949e+08	391676310	4.01608e+08	4.18829e+08	413697814	3.21049e+08	5.00609e+08
Q9NZN4	EHD2	EH domain-containing protein 2 OS=Homo sapiens GN=EHD2 PE=1 SV=2	11.7864	61.1		13371992	1.01834e+07			15194596	1.08033e+07	6.96939e+06
Q9NZN3	EHD3	EH domain-containing protein 3 OS=Homo sapiens GN=EHD3 PE=1 SV=1	35.5311	61.9	107755831	97761484	125900818					5.44931e+07
Q9H223	EHD4	EH domain-containing protein 4 OS=Homo sapiens GN=EHD4 PE=1 SV=1	50.4621	61.1	1.92997e+08	2.07687e+08	2.19134e+08	2.06476e+08	1.97495e+08	1.95027e+08	1.67555e+08	1.1972e+08	1.65016e+08
Q08426	EHHADH	Peroxisomal bifunctional enzyme OS=Homo sapiens GN=EHHADH PE=1 SV=3	57.538	79.4	5.45562e+08	5.52811e+08	6.59664e+08	4.67361e+08	4.53252e+08	4.95215e+08	4.87567e+08	312042813	5.04826e+08
Q9H9B1	EHMT1	Histone-lysine N-methyltransferase, H3 lysine-9 specific 5 OS=Homo sapiens GN=EHMT1 PE=1 SV=3	8.68193	138.2	5.32805e+07	1.38912e+07		7.80287e+06			3.83449e+07		3.51814e+07
Q96KQ7	EHMT2	Histone-lysine N-methyltransferase, H3 lysine-9 specific 3 OS=Homo sapiens GN=EHMT2 PE=1 SV=3	12.1488	132.3	20521674	1.1871e+07	2.4011e+07	2.34625e+07	2.62385e+07	2.60011e+07	1.32053e+07	4.51774e+06	2.42565e+07
O14681	EI24	Etoposide-induced protein 2.4 homolog OS=Homo sapiens GN=EI24 PE=1 SV=4	12.9412	38.9	3.64687e+07	121652633	157132699	153160373	141213095	1.49773e+08	1.36562e+08	50197297	1.57976e+08
P41567	EIF1	Eukaryotic translation initiation factor 1 OS=Homo sapiens GN=EIF1 PE=1 SV=1	76.9912	12.7	1.52666e+08	1.7397e+08	2.29224e+08	1.32067e+09	1.21431e+09	1.34065e+09	291586462	215158362	1.70011e+09
Q8N9N8	EIF1AD	Probable RNA-binding protein EIF1AD OS=Homo sapiens GN=EIF1AD PE=1 SV=1	33.9394	19	2.96242e+07	3.55456e+07	2.20124e+07	13287847		1.37131e+07	3.0736e+07	9.66302e+06	5.78764e+06
P47813	EIF1AX	Eukaryotic translation initiation factor 1A, X-chromosomal OS=Homo sapiens GN=EIF1AX PE=1 SV=2	40.2778	16.5	4.10932e+08	2.52031e+08	5.80696e+08	4.6183e+08	3.97816e+08	2.69495e+08	272808108	2.55625e+08	2.80175e+08
O60739	EIF1B	Eukaryotic translation initiation factor 1b OS=Homo sapiens GN=EIF1B PE=1 SV=2	64.6018	12.8		85929379		147432457	123285970	1.08169e+08	1.24059e+08	66018043	9.73996e+07
Q9BY44	EIF2A	Eukaryotic translation initiation factor 2A OS=Homo sapiens GN=EIF2A PE=1 SV=3	62.2222	64.9	452904985	3.39633e+08	4.24423e+08	4.4448e+08	3.68049e+08	4.31455e+08	4.46841e+08	3.41718e+08	4.1916e+08
P19525	EIF2AK2	Interferon-induced, double-stranded RNA-activated protein kinase OS=Homo sapiens GN=EIF2AK2 PE=1 SV=2	39.5644	62.1	2.7918e+08	2.71294e+08	3.21077e+08	1.83121e+08	2.38106e+08	1.48149e+08	1.75707e+08	1.48734e+08	1.97784e+08
Q9NZJ5	EIF2AK3	Eukaryotic translation initiation factor 2-alpha kinase 3 OS=Homo sapiens GN=EIF2AK3 PE=1 SV=2	5.38117	125.1	2.66433e+07	2.26156e+07	13313527
Q9P2K8	EIF2AK4	Eukaryotic translation initiation factor 2-alpha kinase 4 OS=Homo sapiens GN=EIF2AK4 PE=1 SV=2	4.06307	186.7	2.24096e+07	1.7224e+07	24300181			2.0049e+07	2.64511e+07	1.92763e+07	2.9501e+07
Q14232	EIF2B1	Translation initiation factor eIF-2B subunit alpha OS=Homo sapiens GN=EIF2B1 PE=1 SV=1	59.3443	33.7	2.11121e+08	179467410	1.90176e+08	2.27394e+08	2.03946e+08	202503656	1.69665e+08	9.99854e+07	1.71653e+08
P49770	EIF2B2	Translation initiation factor eIF-2B subunit beta OS=Homo sapiens GN=EIF2B2 PE=1 SV=3	29.0598	39	3.74496e+08	3.75947e+08	2.73458e+08	4.36644e+08	416432555	4.05585e+08	3.17621e+08	8.74292e+07	144082454
Q9NR50	EIF2B3	Translation initiation factor eIF-2B subunit gamma OS=Homo sapiens GN=EIF2B3 PE=1 SV=1	49.115	50.2	1.60764e+08	1.67673e+08	1.8798e+08	1.71762e+08	2.01141e+08	2.14233e+08	1.25507e+08	7.16158e+07	1.16054e+08
Q9UI10	EIF2B4	Translation initiation factor eIF-2B subunit delta OS=Homo sapiens GN=EIF2B4 PE=1 SV=2	42.065	57.5	2.94136e+08	2.72741e+08	3.60328e+08	4.03756e+08	3.23016e+08	3.78371e+08	2.2746e+08	1.50646e+08	2.65334e+08
Q13144	EIF2B5	Translation initiation factor eIF-2B subunit epsilon OS=Homo sapiens GN=EIF2B5 PE=1 SV=3	37.0319	80.3	2.09175e+08	2.23757e+08	2.00023e+08	2.63551e+08	2.48262e+08	2.57967e+08	1.11762e+08	8.66431e+07	1.35248e+08
P41214	EIF2D	Ligatin OS=Homo sapiens GN=LGTN PE=1 SV=3	52.3973	64.7	1.38678e+08	1.2633e+08	1.5106e+08	1.39661e+08	1.26711e+08	1.39991e+08	1.25056e+08	8.7385e+07	1.28207e+08
P05198	EIF2S1	Eukaryotic translation initiation factor 2 subunit 1 OS=Homo sapiens GN=EIF2S1 PE=1 SV=3	62.5397	36.1	1.4497e+09	1.49359e+09	1.79648e+09	1.41908e+09	1.28869e+09	1.2789e+09	8.82292e+08	6.96773e+08	879285627
P20042	EIF2S2	Eukaryotic translation initiation factor 2 subunit 2 OS=Homo sapiens GN=EIF2S2 PE=1 SV=2	72.3724	38.4	9.6266e+08	930774580	7.71172e+08	9.55987e+08	1.00791e+09	1.06897e+09	6.87777e+08	4.73687e+08	7.83094e+08
P41091	EIF2S3	Eukaryotic translation initiation factor 2 subunit 3 OS=Homo sapiens GN=EIF2S3 PE=1 SV=3	52.7542	51.1	1.58404e+09	1.62507e+09	1.88725e+09	1.82897e+09	1.79219e+09	1.90518e+09	1.37591e+09	9.15847e+08	1.41949e+09
Q14152	EIF3A	Eukaryotic translation initiation factor 3 subunit A OS=Homo sapiens GN=EIF3A PE=1 SV=1	33.3575	166.5	5.12711e+08	5.13426e+08	6.33289e+08	7.18716e+08	6.09874e+08	6.89973e+08	6.24596e+08	4.09324e+08	6.86086e+08
P55884	EIF3B	Eukaryotic translation initiation factor 3 subunit B OS=Homo sapiens GN=EIF3B PE=1 SV=3	52.0885	92.4	5.52904e+08	5.4003e+08	5.35108e+08	6.36074e+08	6.71151e+08	6.69049e+08	6.16862e+08	4.00673e+08	5.77346e+08
Q99613	EIF3C	Eukaryotic translation initiation factor 3 subunit C OS=Homo sapiens GN=EIF3C PE=1 SV=1	32.6396	105.3	5.88402e+08	6.36645e+08	647173935	6.96174e+08	7.08619e+08	7.55838e+08	6.83458e+08	4.50175e+08	1.60096e+09
O15371	EIF3D	Eukaryotic translation initiation factor 3 subunit D OS=Homo sapiens GN=EIF3D PE=1 SV=1	45.2555	63.9	4.64831e+08	3.90323e+08	3.27501e+08	5.8771e+08	570024714	5.50327e+08	1.3251e+09	3.6909e+08	5.75371e+08
P60228	EIF3E	Eukaryotic translation initiation factor 3 subunit E OS=Homo sapiens GN=EIF3E PE=1 SV=1	47.4157	52.2	4.50981e+08	3.9891e+08	4.90336e+08	5.51265e+08	4.5907e+08	5.09702e+08	4.21744e+08	2.72668e+08	5.38772e+08
O00303	EIF3F	Eukaryotic translation initiation factor 3 subunit F OS=Homo sapiens GN=EIF3F PE=1 SV=1	50.1401	37.5	4.20797e+08	4.1739e+08	4.64229e+08	4.55e+08	5.45693e+08	6.20528e+08	5.42445e+08	3.35104e+08	6.16072e+08
O75821	EIF3G	Eukaryotic translation initiation factor 3 subunit G OS=Homo sapiens GN=EIF3G PE=1 SV=2	51.25	35.6	3.06971e+08	2.97912e+08	3.30029e+08	4.63765e+08	4.08102e+08	4.17268e+08	2.73856e+08	2.46031e+08	4.13678e+08
O15372	EIF3H	Eukaryotic translation initiation factor 3 subunit H OS=Homo sapiens GN=EIF3H PE=1 SV=1	55.6818	39.9	2.47937e+08	2.45798e+08	2.61896e+08	3.21287e+08	2.87367e+08	2.66649e+08	3.2647e+08	1.71769e+08	3.56603e+08
Q13347	EIF3I	Eukaryotic translation initiation factor 3 subunit I OS=Homo sapiens GN=EIF3I PE=1 SV=1	71.6923	36.5	4.89309e+08	5.07094e+08	4.83367e+08	4.66447e+08	6.20898e+08	5.37083e+08	543635682	3.3035e+08	5.03202e+08
O75822	EIF3J	Eukaryotic translation initiation factor 3 subunit J OS=Homo sapiens GN=EIF3J PE=1 SV=2	41.0853	29	2.57635e+08	242589690	3.29592e+08	3.14174e+08	3.29073e+08	3.27296e+08	266384638	1.36398e+08	2.71028e+08
Q9UBQ5	EIF3K	Eukaryotic translation initiation factor 3 subunit K OS=Homo sapiens GN=EIF3K PE=1 SV=1	52.2936	25	3.44855e+08	3.44475e+08	4.04486e+08	3.59262e+08	4.16019e+08	4.3283e+08	2.84282e+08	2.42773e+08	4.44629e+08
Q9Y262	EIF3L	Eukaryotic translation initiation factor 3 subunit L OS=Homo sapiens GN=EIF3L PE=1 SV=1	54.2553	66.7	4.25677e+08	3.42027e+08	3.09973e+08	5.05519e+08	4.50575e+08	5.10432e+08	5.10258e+08	3.07064e+08	4.27438e+08
Q7L2H7	EIF3M	Eukaryotic translation initiation factor 3 subunit M OS=Homo sapiens GN=EIF3M PE=1 SV=1	48.1283	42.5	2.60034e+08	3.58477e+08	317473852	381580909	3.84929e+08	4.23001e+08	3.66138e+08	2.16242e+08	4.37469e+08
P60842	EIF4A1	Eukaryotic initiation factor 4A-I OS=Homo sapiens GN=EIF4A1 PE=1 SV=1	68.7192	46.1	3.63546e+09	3295972666	4.17005e+09	3.36799e+09	3.39651e+09	3.5473e+09	3.66892e+09	2.40791e+09	4.1468e+09
Q14240	EIF4A2	Eukaryotic initiation factor 4A-II OS=Homo sapiens GN=EIF4A2 PE=1 SV=2	62.8993	46.4	2.09368e+08	4.59554e+08	531929002	489034531	3.22868e+08	4.82301e+08	4.3802e+08	1.84542e+08	4.4713e+08
P38919	EIF4A3	Eukaryotic initiation factor 4A-III OS=Homo sapiens GN=EIF4A3 PE=1 SV=4	77.129	46.8	4.22373e+09	3.83337e+09	4.81071e+09	3.96138e+09	3.28432e+09	3.7447e+09	4.19932e+09	2.04036e+09	4.06384e+09
P23588	EIF4B	Eukaryotic translation initiation factor 4B OS=Homo sapiens GN=EIF4B PE=1 SV=2	31.9149	69.1	2.85909e+08	2.92347e+08	2.35166e+08	3.55455e+08	3.565e+08	3.45282e+08	3.41292e+08	3.3287e+08	268738383
P06730	EIF4E	Eukaryotic translation initiation factor 4E OS=Homo sapiens GN=EIF4E PE=1 SV=2	42.8571	25.1	4.81386e+08	4.98632e+08	4.48033e+08	5.37246e+08	5.0859e+08	5.51492e+08	4.70217e+08	2.91333e+08	4.28929e+08
O60573	EIF4E2	Eukaryotic translation initiation factor 4E type 2 OS=Homo sapiens GN=EIF4E2 PE=1 SV=1	39.1837	28.3	9.60146e+07	3.77017e+07	103219920			106019558	22318297	79253470	1.81255e+07
Q13541	EIF4EBP1	Eukaryotic translation initiation factor 4E-binding protein 1 OS=Homo sapiens GN=EIF4EBP1 PE=1 SV=3	48.3051	12.6	1162866694	1185679006	2.22243e+07				289378241	2.03648e+07
Q13542	EIF4EBP2	Eukaryotic translation initiation factor 4E-binding protein 2 OS=Homo sapiens GN=EIF4EBP2 PE=1 SV=1	25.8333	12.9			2.97099e+07					26736288	3.40673e+07
Q04637	EIF4G1	Eukaryotic translation initiation factor 4 gamma 1 OS=Homo sapiens GN=EIF4G1 PE=1 SV=3	33.875	175.4	6.33408e+08	5.97769e+08	6.62846e+08	5.94508e+08	5.45598e+08	6.3522e+08	5.63992e+08	3.47861e+08	6.31697e+08
P78344	EIF4G2	Eukaryotic translation initiation factor 4 gamma 2 OS=Homo sapiens GN=EIF4G2 PE=1 SV=1	43.2194	102.3	3.2408e+08	3.38323e+08	3.75166e+08	3.22587e+08	3.46295e+08	404092866	3.07442e+08	1.86818e+08	3.15551e+08
O43432	EIF4G3	Eukaryotic translation initiation factor 4 gamma 3 OS=Homo sapiens GN=EIF4G3 PE=1 SV=2	6.6877	176.5	1.89272e+07	1.7546e+07	7.20295e+08	3.72619e+08	1.9676e+08	661771608	3.06083e+08	7.04326e+06	3.43025e+08
Q15056	EIF4H	Eukaryotic translation initiation factor 4H OS=Homo sapiens GN=EIF4H PE=1 SV=5	33.4677	27.4	1350542590	1.3677e+09	1.36807e+09	1.48133e+09	1.27925e+09	1.32982e+09	1.35395e+09	8.95054e+08	1.39602e+09
P55010	EIF5	Eukaryotic translation initiation factor 5 OS=Homo sapiens GN=EIF5 PE=1 SV=2	40.3712	49.2	7.74113e+08	7.42003e+08	840279186	8.38777e+08	7.71306e+08	8.40958e+08	5.93522e+08	338247896	693905144
P63241	EIF5A	Eukaryotic translation initiation factor 5A-1 OS=Homo sapiens GN=EIF5A PE=1 SV=2	87.6623	16.8	5.62524e+09	5477196681	6284256206	5.05169e+09	5.23096e+09	5262113459	4.79294e+09	3.20828e+09	5.22815e+09
O60841	EIF5B	Eukaryotic translation initiation factor 5B OS=Homo sapiens GN=EIF5B PE=1 SV=4	43.9344	138.7	8.64458e+08	1.05817e+09	1.08797e+09	1.17906e+09	1.08858e+09	1.13851e+09	959574650	6.11583e+08	9.34572e+08
P56537	EIF6	Eukaryotic translation initiation factor 6 OS=Homo sapiens GN=EIF6 PE=1 SV=1	56.7347	26.6	2.13789e+09	2.07699e+09	2.15076e+09	2.3318e+09	2.07918e+09	2.32876e+09	1.98603e+09	1.31318e+09	2.12031e+09
Q53HC9	EIPR1	Protein TSSC1 OS=Homo sapiens GN=TSSC1 PE=1 SV=2	33.3333	43.6	9.71954e+07	68653688	1.2131e+08	8.9147e+07	8.66133e+07	5.092e+07	5.37843e+07	4.94937e+07	8.63775e+07
Q9BQ52	ELAC2	Zinc phosphodiesterase ELAC protein 2 OS=Homo sapiens GN=ELAC2 PE=1 SV=2	53.9952	92.2	3.17291e+08	3.09703e+08	3.59016e+08	3.42374e+08	3.39627e+08	3.84792e+08	3.56879e+08	1.59687e+08	3.8498e+08
Q15717	ELAVL1	ELAV-like protein 1 OS=Homo sapiens GN=ELAVL1 PE=1 SV=2	58.2822	36.1	1.60492e+09	1.64645e+09	1.67161e+09	7.40381e+08	1.33531e+09	1.36708e+09	1.6225e+09	9.82179e+08	1.33479e+09
P26378	ELAVL4	ELAV-like protein 4 OS=Homo sapiens GN=ELAVL4 PE=1 SV=2	8.68421	41.7
P32519	ELF1	ETS-related transcription factor Elf-1 OS=Homo sapiens GN=ELF1 PE=1 SV=2	32.6333	67.5	2.80412e+07	2.39275e+07	3.43976e+07	37777831	5.33142e+07	4.72219e+07	4.56836e+07	1.52854e+07	4.94198e+07
Q15723	ELF2	ETS-related transcription factor Elf-2 OS=Homo sapiens GN=ELF2 PE=1 SV=2	5.56492	63.9		1.96111e+07	26027017
P55199	ELL	RNA polymerase II elongation factor ELL OS=Homo sapiens GN=ELL PE=1 SV=1	6.28019	68.2			9.50538e+06
Q96JJ3	ELMO2	Engulfment and cell motility protein 2 OS=Homo sapiens GN=ELMO2 PE=1 SV=2	28.3333	82.6	8.2983e+07	9.45505e+07	9.76756e+07	9.91359e+07	8.31631e+07	8.89413e+07	7.52906e+07	4.71075e+07	7.49623e+07
Q8IZ81	ELMOD2	ELMO domain-containing protein 2 OS=Homo sapiens GN=ELMOD2 PE=1 SV=1	26.2799	34.9	2.94365e+08	2.18129e+08	356138776	2.03647e+08	3.89589e+08	378219129	1.34422e+08	8.57149e+07	3.34503e+08
Q14241	ELOA	Transcription elongation factor B polypeptide 3 OS=Homo sapiens GN=TCEB3 PE=1 SV=1	13.4715	87.2	1.29213e+08	1.36207e+08	1.51324e+08	1.48318e+08	9.39308e+07	1.3285e+08	1.09055e+08	9.37761e+07	1.04195e+08
Q15370	ELOB	Transcription elongation factor B polypeptide 2 OS=Homo sapiens GN=TCEB2 PE=1 SV=1	58.4746	13.1	2.86988e+08	3.05585e+08	2.46481e+08	9.17631e+08	1.11196e+09	1.23502e+09	2.82521e+08	1.98648e+08	1.36305e+09
Q15369	ELOC	Transcription elongation factor B polypeptide 1 OS=Homo sapiens GN=TCEB1 PE=1 SV=1	56.25	12.5	5.07868e+08	5.32448e+08	5.87166e+08	3.64774e+08	5.09843e+08	466860736	4.16247e+08	3.91323e+08	5.05354e+08
P60002	ELOF1	Transcription elongation factor 1 homolog OS=Homo sapiens GN=ELOF1 PE=2 SV=1	21.6867	9.5	4.20062e+07	5.30541e+07	58224980	3.27931e+07	35042216	5.08654e+07	63017940	42478136	46127780
Q9BW60	ELOVL1	Elongation of very long chain fatty acids protein 1 OS=Homo sapiens GN=ELOVL1 PE=1 SV=1	12.9032	32.6	3.92609e+08	5.2028e+08	4.4704e+08	6.39034e+08	4.78108e+08	648398710	3.49773e+08	2.59527e+08	3.57847e+08
Q9NXB9	ELOVL2	Elongation of very long chain fatty acids protein 2 OS=Homo sapiens GN=ELOVL2 PE=2 SV=2	13.1757	34.6	1.55501e+08	1.90185e+08	1.83571e+08	1.81703e+08	1.1668e+08	1.26612e+08	1.74214e+08	6.52757e+07	1.54097e+08
Q9NYP7	ELOVL5	Elongation of very long chain fatty acids protein 5 OS=Homo sapiens GN=ELOVL5 PE=1 SV=1	7.35786	35.3	1579427791	1.52552e+09	1.69778e+09	1.44707e+09	1.40594e+09	1504690996	1371640237	7.14248e+08	1.11024e+09
Q9H5J4	ELOVL6	Elongation of very long chain fatty acids protein 6 OS=Homo sapiens GN=ELOVL6 PE=2 SV=1	6.03774	31.4
O95163	ELP1	Elongator complex protein 1 OS=Homo sapiens GN=IKBKAP PE=1 SV=3	39.1892	150.2	1.93734e+08	2.28317e+08	2.4471e+08	1.87833e+08	1.69866e+08	2.04492e+08	1.84818e+08	1.12915e+08	2.01302e+08
Q6IA86	ELP2	Elongator complex protein 2 OS=Homo sapiens GN=ELP2 PE=1 SV=2	3.87409	92.4		35366158			3.963e+07		29604529
Q9H9T3	ELP3	Elongator complex protein 3 OS=Homo sapiens GN=ELP3 PE=1 SV=2	23.4004	62.2	6.24518e+07	4.36132e+07	5.58492e+07	6.05801e+08	5.94911e+08	8.19327e+07	6.02258e+07	3.59507e+07	5.59356e+07
Q96EB1	ELP4	Elongator complex protein 4 OS=Homo sapiens GN=ELP4 PE=1 SV=2	8.96226	46.6				9.74383e+06	5.76685e+06			1.86763e+07
Q0PNE2	ELP6	UPF0405 protein C3orf75 OS=Homo sapiens GN=C3orf75 PE=2 SV=1	9.3985	29.8
Q8N766	EMC1	Uncharacterized protein KIAA0090 OS=Homo sapiens GN=KIAA0090 PE=1 SV=1	52.2659	111.7	1.02055e+09	1.01623e+09	1.18832e+09	9.42906e+08	9.01952e+08	9.47203e+08	8.345e+08	5.44707e+08	9.03711e+08
Q15006	EMC2	Tetratricopeptide repeat protein 35 OS=Homo sapiens GN=TTC35 PE=1 SV=1	46.4646	34.8	3.91184e+08	3.88755e+08	4.38041e+08	3.46934e+08	3.42107e+08	3.45502e+08	3.3098e+08	2.06761e+08	2.75213e+08
Q9P0I2	EMC3	Transmembrane protein 111 OS=Homo sapiens GN=TMEM111 PE=1 SV=3	48.2759	29.9	321388601	3.31874e+08	3.49413e+08	3.87496e+08	3.39583e+08	3.47543e+08	3.29752e+08	2.27144e+08	3.14285e+08
Q5J8M3	EMC4	Transmembrane protein 85 OS=Homo sapiens GN=TMEM85 PE=1 SV=2	33.3333	20.1	3.30102e+08	3.71509e+08	2.40014e+08		351166112	359584700	330935869	2.63637e+08	322944862
Q9BV81	EMC6	Transmembrane protein 93 OS=Homo sapiens GN=TMEM93 PE=1 SV=1	10.9091	12	2.65216e+08	2.50945e+08	213310804	2.61341e+08	248146909	2.05855e+08	2.13944e+08	1.32825e+08	1.69981e+08
Q9NPA0	EMC7	UPF0480 protein C15orf24 OS=Homo sapiens GN=C15orf24 PE=1 SV=1	43.8017	26.5	7.15436e+08	5.91425e+08	701150630	5.30787e+08	5.33203e+08	6.08203e+08	5.5651e+08	3.22337e+08	6.22104e+08
O43402	EMC8	Neighbor of COX4 OS=Homo sapiens GN=COX4NB PE=1 SV=1	36.6667	23.8	1.75974e+08	1.59352e+08	1.27311e+08	263295089	2.43912e+08	2.70886e+08	2.03839e+08	113760655	1.73586e+08
Q9Y3B6	EMC9	UPF0172 protein FAM158A OS=Homo sapiens GN=FAM158A PE=2 SV=3	14.4231	23	2.24481e+07	1.83588e+07	2.10772e+07		4.99545e+07	5.59514e+07			56022068
P50402	EMD	Emerin OS=Homo sapiens GN=EMD PE=1 SV=1	72.8346	29	2.60323e+08	251248889	2.63541e+08	2.3218e+08	2.22656e+08	2.25703e+08	2.67142e+08	2.00357e+08	236670842
Q92979	EMG1	Probable ribosome biogenesis protein NEP1 OS=Homo sapiens GN=EMG1 PE=1 SV=4	73.3607	26.7	8.19514e+08	8.04336e+08	1.12502e+09	1.08745e+09	9.38835e+08	9.66439e+08	7.42788e+08	5.8375e+08	8.6324e+08
Q9Y6C2	EMILIN1	EMILIN-1 OS=Homo sapiens GN=EMILIN1 PE=1 SV=2	7.77559	106.6			3.42201e+07			5.25189e+06
O00423	EML1	Echinoderm microtubule-associated protein-like 1 OS=Homo sapiens GN=EML1 PE=1 SV=3	2.08589	89.8	589104704		7.38502e+08			613624196	4.11104e+08	281902912
O95834	EML2	Echinoderm microtubule-associated protein-like 2 OS=Homo sapiens GN=EML2 PE=1 SV=1	2.46533	70.6	12547695	1.35924e+07					1.05507e+07
Q32P44	EML3	Echinoderm microtubule-associated protein-like 3 OS=Homo sapiens GN=EML3 PE=1 SV=1	2.67857	95.1	2.93299e+07								1.92931e+07
Q9HC35	EML4	Echinoderm microtubule-associated protein-like 4 OS=Homo sapiens GN=EML4 PE=1 SV=2	56.6769	108.8	1.58864e+09	1.68081e+09	1.78944e+09	2.01783e+09	1.86288e+09	1.89406e+09	1.37439e+09	9.27613e+08	1.41655e+09
Q6ZMW3	EML6	Echinoderm microtubule-associated protein-like 6 OS=Homo sapiens GN=EML6 PE=2 SV=2	0.919305	217.8
P54852	EMP3	Epithelial membrane protein 3 OS=Homo sapiens GN=EMP3 PE=2 SV=1	4.90798	18.4			4.88994e+07				3.97321e+07	22879668
Q8N8S7	ENAH	Protein enabled homolog OS=Homo sapiens GN=ENAH PE=1 SV=2	32.9949	66.5	3.81282e+07	3.60988e+07	6.40771e+07	6.01397e+07	5.36157e+07	4.98759e+07	1.11939e+08	3.67395e+07	5.7981e+07
O94919	ENDOD1	Endonuclease domain-containing 1 protein OS=Homo sapiens GN=ENDOD1 PE=1 SV=2	30	55	7.09028e+07	8.30463e+07	71745358	111989251	7.30697e+07	7.53757e+07	8.867e+07	7.50928e+07	1.03245e+08
Q14249	ENDOG	Endonuclease G, mitochondrial OS=Homo sapiens GN=ENDOG PE=1 SV=3	10.4377	32.6	62547435	2.77835e+07	23188447				4.02944e+07	52122782
P17813	ENG	Endoglin OS=Homo sapiens GN=ENG PE=1 SV=2	9.42249	70.5	5.20324e+07						49540083	4.00768e+07
Q8NFI3	ENGASE	Cytosolic endo-beta-N-acetylglucosaminidase OS=Homo sapiens GN=ENGASE PE=1 SV=1	1.61507	83.9	12942071
P06733	ENO1	Alpha-enolase OS=Homo sapiens GN=ENO1 PE=1 SV=2	78.5714	47.1	2.90369e+10	2.5956e+10	2.93435e+10	2.50296e+10	2.56644e+10	2.79343e+10	2.77224e+10	1.75917e+10	2.93723e+10
P09104	ENO2	Gamma-enolase OS=Homo sapiens GN=ENO2 PE=1 SV=3	70.5069	47.2	2.04373e+08	1.98792e+08	2.2762e+08	3.28589e+08	2.59867e+08	2.97806e+08	5.23795e+08	1.70463e+08	3.10901e+08
P13929	ENO3	Beta-enolase OS=Homo sapiens GN=ENO3 PE=1 SV=4	28.1106	46.9	2.80778e+09	6348631114	3.56213e+09	6630574710	3.15725e+09	3.2327e+09	3.68366e+09	4409913656	3.7434e+09
Q9UHY7	ENOPH1	Enolase-phosphatase E1 OS=Homo sapiens GN=ENOPH1 PE=1 SV=1	48.659	28.9	2.22519e+08	1.57552e+08	1.56413e+08	2.43726e+08	2.09398e+08	2.62989e+08	2.6432e+08	1.28194e+08	2.09975e+08
Q7L5Y1	ENOSF1	Mitochondrial enolase superfamily member 1 OS=Homo sapiens GN=ENOSF1 PE=1 SV=1	3.83747	49.8			1.53624e+07
P22413	ENPP1	Ectonucleotide pyrophosphatase/phosphodiesterase family member 1 OS=Homo sapiens GN=ENPP1 PE=1 SV=2	40.3243	104.9	1.20583e+08	1.50676e+08	1.5585e+08	1.47388e+08	1.48044e+08	1.68365e+08	1.46303e+08	8.94477e+07	1.51757e+08
O14638	ENPP3	Ectonucleotide pyrophosphatase/phosphodiesterase family member 3 OS=Homo sapiens GN=ENPP3 PE=1 SV=2	16.2286	100.1	3.74251e+07	2.63075e+07	2.59594e+07		3.99195e+07	2.18719e+07	1.61715e+07	1.31816e+07	5.41651e+07
O43768	ENSA	Alpha-endosulfine OS=Homo sapiens GN=ENSA PE=1 SV=1	39.6694	13.4	3.9216e+06			8.84703e+06	1.08907e+07	1.18546e+07	4.72018e+06	1.00195e+07	2.2782e+06
Q9Y5L3	ENTPD2	Ectonucleoside triphosphate diphosphohydrolase 2 OS=Homo sapiens GN=ENTPD2 PE=1 SV=1	22.8283	53.6	2.36095e+08	2.69846e+08	253210873	2.00056e+08	1.88501e+08	2.17786e+08	1.45394e+08	8.10212e+07	1.62157e+08
O75356	ENTPD5	Ectonucleoside triphosphate diphosphohydrolase 5 OS=Homo sapiens GN=ENTPD5 PE=1 SV=1	40.1869	47.5	2.63829e+08	2.91919e+08	3.10723e+08	1.25973e+08	1.62536e+08	3.1135e+08	2.65741e+08	4.44636e+08	2.96719e+08
O75354	ENTPD6	Ectonucleoside triphosphate diphosphohydrolase 6 OS=Homo sapiens GN=ENTPD6 PE=1 SV=2	19.8347	53.2	3.62168e+07	56351019	5.69811e+07				96381593	57292177	4.90166e+07
Q9NQZ7	ENTPD7	Ectonucleoside triphosphate diphosphohydrolase 7 OS=Homo sapiens GN=ENTPD7 PE=2 SV=1	10.2649	68.9	1.34541e+07	1.46086e+07	16128506	1.1882e+07		1.40492e+07	11776477
Q5MY95	ENTPD8	Ectonucleoside triphosphate diphosphohydrolase 8 OS=Homo sapiens GN=ENTPD8 PE=1 SV=2	6.26263	53.9	39843239
Q9NPA8	ENY2	Enhancer of yellow 2 transcription factor homolog OS=Homo sapiens GN=ENY2 PE=1 SV=1	24.7525	11.5	3.49811e+08	293440504	276670422	2.16246e+08	265201322	1.78367e+08	3.31315e+08	1.3956e+08	337380272
Q5NDL2	EOGT	Uncharacterized glycosyltransferase AER61 OS=Homo sapiens GN=AER61 PE=2 SV=1	6.07211	62	1.60587e+07		1.65923e+07		1.05399e+07	23154147	2.29501e+07
Q09472	EP300	Histone acetyltransferase p300 OS=Homo sapiens GN=EP300 PE=1 SV=2	8.98923	264	2.93872e+07	3.5979e+07	3.7048e+07
Q96L91	EP400	E1A-binding protein p400 OS=Homo sapiens GN=EP400 PE=1 SV=3	9.05063	343.4	2.34602e+07	2.41258e+07	3.48605e+07	1.57751e+07		2.72637e+07	4.44938e+07	1.32918e+07	5.59004e+07
P11171	EPB41	Protein 4.1 OS=Homo sapiens GN=EPB41 PE=1 SV=4	24.3056	97	304194862	2.89498e+08	3.1581e+08	2.0453e+08	259530720	2.84241e+08	3.32574e+08	1.76548e+08	3.26364e+08
Q9H4G0	EPB41L1	Band 4.1-like protein 1 OS=Homo sapiens GN=EPB41L1 PE=1 SV=2	22.9285	98.4	2.19182e+07	2.15444e+07	4.39773e+07	3.38493e+07	49996290		4.83414e+07	1.8572e+07	36013434
O43491	EPB41L2	Band 4.1-like protein 2 OS=Homo sapiens GN=EPB41L2 PE=1 SV=1	54.4279	112.5	8.78307e+08	8.85647e+08	9.6391e+08	9.83264e+08	9.44476e+08	9.05126e+08	7.88478e+08	5.8829e+08	8.93346e+08
Q9H329	EPB41L4B	Band 4.1-like protein 4B OS=Homo sapiens GN=EPB41L4B PE=2 SV=2	5.77778	99.7	4.28607e+07	4.81874e+07	4.59922e+07	5.56493e+07	4.8124e+07	3.08078e+07	3.60642e+07	7.24954e+06	5.3513e+07
Q9HCM4	EPB41L5	Band 4.1-like protein 5 OS=Homo sapiens GN=EPB41L5 PE=1 SV=3	30.6958	81.8	1.37786e+08	8.41494e+07	6.3543e+07	1.05468e+08	5.53512e+07	6.28908e+07	7.26765e+07	4.02954e+07	8.27332e+07
P16422	EPCAM	Epithelial cell adhesion molecule OS=Homo sapiens GN=EPCAM PE=1 SV=2	42.6752	34.9	1.20415e+09	1.20801e+09	1.2352e+09	1.16434e+09	1.12119e+09	1.18705e+09	1.0831e+09	7.98898e+08	1.0899e+09
Q9UM22	EPDR1	Mammalian ependymin-related protein 1 OS=Homo sapiens GN=EPDR1 PE=1 SV=2	12.9464	25.4	1.45814e+08	1.16334e+08	1.50964e+08	1.1324e+08	7.3666e+07	1.24837e+08	9.15498e+07	4.64671e+07	1.46608e+08
Q9HCE0	EPG5	UPF0493 protein KIAA1632 OS=Homo sapiens GN=KIAA1632 PE=2 SV=2	1.43466	292.3	5.01386e+07
P29317	EPHA2	Ephrin type-A receptor 2 OS=Homo sapiens GN=EPHA2 PE=1 SV=2	53.2787	108.2	4.94056e+08	5.56689e+08	9.98907e+08	6.40155e+08	6.64973e+08	6.76344e+08	5.26903e+08	5.3391e+08	5.68854e+08
P54760	EPHB4	Ephrin type-B receptor 4 OS=Homo sapiens GN=EPHB4 PE=1 SV=2	13.6778	108.2	38863849	5.33174e+07	5.59372e+07	8.53675e+07	7.08313e+07		60110849	4.39002e+07	77213597
P07099	EPHX1	Epoxide hydrolase 1 OS=Homo sapiens GN=EPHX1 PE=1 SV=1	56.2637	52.9	3.20671e+09	3.0077e+09	3.23871e+09	3.05437e+09	3.20673e+09	3.24004e+09	2689557730	1.81631e+09	3254831442
P34913	EPHX2	Epoxide hydrolase 2 OS=Homo sapiens GN=EPHX2 PE=1 SV=2	50.991	62.6	1.29785e+08	106917290	1.66845e+08	1.76751e+08	1.53941e+08	1.56047e+08	1.05173e+08	9.77693e+07	1.49284e+08
Q7L775	EPM2AIP1	EPM2A-interacting protein 1 OS=Homo sapiens GN=EPM2AIP1 PE=1 SV=1	8.89621	70.3			1.17415e+07				2.94464e+07
Q9Y6I3	EPN1	Epsin-1 OS=Homo sapiens GN=EPN1 PE=1 SV=1	19.9637	57.5	7.18639e+07	7.03123e+07	8.14933e+07	3.77895e+07	4.05638e+07	3.22506e+07	4.40986e+07	4.7305e+07	4.43494e+07
O95208	EPN2	Epsin-2 OS=Homo sapiens GN=EPN2 PE=1 SV=3	7.33229	68.4	22284680			3.05006e+07	2.85616e+07		3.02775e+07		3.95527e+07
P58107	EPPK1	Epiplakin OS=Homo sapiens GN=EPPK1 PE=1 SV=1	68.8253	552.8	2307842568	2.26126e+09	2.58918e+09	2.08251e+09	2.01743e+09	2.25439e+09	2.3576e+09	1.5463e+09	1.74351e+09
P07814	EPRS1	Bifunctional aminoacyl-tRNA synthetase OS=Homo sapiens GN=EPRS PE=1 SV=5	54.828	170.5	4.96083e+08	4.34567e+08	4.55062e+08	5.66067e+08	479489017	6.18602e+08	4.6698e+08	3.19859e+08	6.03457e+08
P42566	EPS15	Epidermal growth factor receptor substrate 15 OS=Homo sapiens GN=EPS15 PE=1 SV=2	15.8482	98.6	1.96919e+07	2.02432e+07	1.70257e+07	1.39029e+07	2.27053e+07	18845140		14462654	1.91634e+07
Q9UBC2	EPS15L1	Epidermal growth factor receptor substrate 15-like 1 OS=Homo sapiens GN=EPS15L1 PE=1 SV=1	48.4954	94.2	1.28726e+08	1.26452e+08	1.63346e+08	1.28962e+08	1.35759e+08	1.35197e+08	1.56997e+08	1.11774e+08	1.64849e+08
Q12929	EPS8	Epidermal growth factor receptor kinase substrate 8 OS=Homo sapiens GN=EPS8 PE=1 SV=1	31.7518	91.8	1.04618e+08	9.69066e+07	1.34453e+08	1.32644e+08	1.22831e+08	1.03106e+08	1.26315e+08	8.10142e+07	1.06742e+08
Q9H6S3	EPS8L2	Epidermal growth factor receptor kinase substrate 8-like protein 2 OS=Homo sapiens GN=EPS8L2 PE=1 SV=2	55.8042	80.6	4.84399e+08	5.07317e+08	5.5591e+08	4.12281e+08	4.78464e+08	4.65623e+08	5.78039e+08	4.09878e+08	6.31946e+08
Q8TE67	EPS8L3	Epidermal growth factor receptor kinase substrate 8-like protein 3 OS=Homo sapiens GN=EPS8L3 PE=1 SV=2	26.6442	66.8	3.44447e+07	4.0479e+07	1.04737e+08	6.77734e+07	8.404e+07	1.09191e+08	1.12727e+08	4.25977e+07	9.88638e+07
O75616	ERAL1	GTP-binding protein era homolog OS=Homo sapiens GN=ERAL1 PE=1 SV=2	55.3776	48.3	2.78836e+08	2.41305e+08	310459675	2.81753e+08	2.95084e+08	3.1495e+08	2.98592e+08	1.21061e+08	2.72241e+08
Q9NZ08	ERAP1	Endoplasmic reticulum aminopeptidase 1 OS=Homo sapiens GN=ERAP1 PE=1 SV=3	35.3879	107.2	1.36842e+08	1.54847e+08	2.50122e+08	1.58046e+08	1.22728e+08	1.42886e+08	1.75689e+08	1.10421e+08	1.76181e+08
Q6P179	ERAP2	Endoplasmic reticulum aminopeptidase 2 OS=Homo sapiens GN=ERAP2 PE=1 SV=2	12.7083	110.4	2.01544e+07	2.75922e+07	2.31075e+07	2.82385e+07	2.06047e+07	2.04282e+07	2.76807e+07	3.22252e+06	3.29514e+07
P04626	ERBB2	Receptor tyrosine-protein kinase erbB-2 OS=Homo sapiens GN=ERBB2 PE=1 SV=1	8.76494	137.8	2.09532e+07	95391358	5.67743e+08	1.99432e+07	1.67607e+07	1.38192e+07	20757701	3.81625e+07	2.52451e+07
P21860	ERBB3	Receptor tyrosine-protein kinase erbB-3 OS=Homo sapiens GN=ERBB3 PE=1 SV=1	5.36513	148	23833917	23089790	1.61629e+07					1.30454e+07
Q96RT1	ERBIN	Protein LAP2 OS=Homo sapiens GN=ERBB2IP PE=1 SV=2	8.2153	158.2	4.14284e+07	4.36942e+07	6.62168e+07	4.47024e+07	3.0959e+07	5.01042e+07	4.85042e+07	1.94697e+07	5.01606e+07
Q8IUD2	ERC1	ELKS/RAB6-interacting/CAST family member 1 OS=Homo sapiens GN=ERC1 PE=1 SV=1	16.3082	128	4.03508e+07	3.99117e+07	3.91391e+07	3.7933e+07	2.17771e+07	4.00739e+07		2.35337e+07	4.05391e+07
P07992	ERCC1	DNA excision repair protein ERCC-1 OS=Homo sapiens GN=ERCC1 PE=1 SV=1	19.5286	32.5	1.39937e+07	1.22824e+07	2.383e+07	2.34758e+07	1.75416e+07	25955332	2.116e+07	9.68913e+06	3.34775e+08
P18074	ERCC2	TFIIH basal transcription factor complex helicase subunit OS=Homo sapiens GN=ERCC2 PE=1 SV=1	36.0526	86.9	1.91534e+08	1.89143e+08	1.65335e+08	1.49551e+08	1.3333e+08	1.55285e+08	8.73654e+07	6.39801e+07	1.37268e+08
P19447	ERCC3	TFIIH basal transcription factor complex helicase XPB subunit OS=Homo sapiens GN=ERCC3 PE=1 SV=1	36.0614	89.2	1.2885e+08	1.08677e+08	1.71509e+08	9.1242e+07	8.75444e+07	1.08552e+08	1.31561e+08	6.73361e+07	1.0587e+08
Q92889	ERCC4	DNA repair endonuclease XPF OS=Homo sapiens GN=ERCC4 PE=1 SV=3	8.95197	104.4	3.76564e+07	32367921	56129584	55057153	4.71658e+07	3.78151e+07	6.06179e+07	2.51694e+07	2.61774e+07
P28715	ERCC5	DNA repair protein complementing XP-G cells OS=Homo sapiens GN=ERCC5 PE=1 SV=3	8.09444	133			20448960						5.55881e+06
Q03468	ERCC6	DNA excision repair protein ERCC-6 OS=Homo sapiens GN=ERCC6 PE=1 SV=1	1.6075	168.3
Q2NKX8	ERCC6L	DNA excision repair protein ERCC-6-like OS=Homo sapiens GN=ERCC6L PE=1 SV=1	14.32	141	2.70595e+07	1.74677e+07	1.43233e+07	18411577	9681798	2.06449e+07	2.26542e+07	1.61213e+07	33630876
Q9UKR5	ERG28	Probable ergosterol biosynthetic protein 28 OS=Homo sapiens GN=C14orf1 PE=1 SV=1	6.42857	15.9	364627754	449486300	507255636	277224842	252270792	284272505	74182947	253893364	284435134
Q969X5	ERGIC1	Endoplasmic reticulum-Golgi intermediate compartment protein 1 OS=Homo sapiens GN=ERGIC1 PE=1 SV=1	45.1724	32.6	4.71607e+08	4.8102e+08	6.16569e+08	5.22559e+08	492752007	5.70776e+08	4.6514e+08	2.52033e+08	5.63395e+08
Q96RQ1	ERGIC2	Endoplasmic reticulum-Golgi intermediate compartment protein 2 OS=Homo sapiens GN=ERGIC2 PE=1 SV=2	30.2387	42.5	1.06051e+08	8.83749e+07	1.43414e+08	7.30171e+07	1.09738e+08	8.26469e+07	9.80275e+07	4.86435e+07	8.03015e+07
Q9Y282	ERGIC3	Endoplasmic reticulum-Golgi intermediate compartment protein 3 OS=Homo sapiens GN=ERGIC3 PE=1 SV=1	26.893	43.2	1.26441e+08	1.4873e+08	1.75028e+08	1.07277e+08	8.37654e+07	90189927	8.58304e+07	6.14613e+07	7.19273e+07
P84090	ERH	Enhancer of rudimentary homolog OS=Homo sapiens GN=ERH PE=1 SV=1	45.1923	12.3	2.45579e+09	3.51202e+09	3.5388e+09	3.58831e+09	3.72807e+09	3.95767e+09	3.84467e+09	2.76178e+09	3.68589e+09
Q8IV48	ERI1	3'-5' exoribonuclease 1 OS=Homo sapiens GN=ERI1 PE=1 SV=3	10.0287	40	4.05804e+07	43958164			36779216	30647912			26220376
A8K979	ERI2	ERI1 exoribonuclease 2 OS=Homo sapiens GN=ERI2 PE=2 SV=2	3.61795	77.4								1.18283e+07
O43414	ERI3	ERI1 exoribonuclease 3 OS=Homo sapiens GN=ERI3 PE=1 SV=2	5.63798	37.2									38862151
Q86X53	ERICH1	Glutamate-rich protein 1 OS=Homo sapiens GN=ERICH1 PE=1 SV=1	3.83747	49
[truncated: 5,308 more rows]

## Sheet: Quantitative-3960
Accession	Gene name	Description	pValue	Control-1	Control-2	Control-3	Nenanimibe-1	Nenanimibe-2	Nenanimibe-3	Nilotinib-1	Nilotinib-2	Nilotinib-3	Nevanimibe/C-1	Nevanimibe/C-2	Nevanimibe/C-3	Nilotinib/C-1	Nilotinib/C-2	Nilotinib/C-3	Nevanimibe/C	Nilotinib/C	Log(FC)-nenanimibe	Log(FC)-nilotinib
A0AVT1	UBA6	Ubiquitin-like modifier-activating enzyme 6 OS=Homo sapiens GN=UBA6 PE=1 SV=1	0.0871334	1.28704e+08	1.01846e+08	1.38448e+08	1.01502e+08	1.19386e+08	1.17232e+08	1.301e+08	7.46728e+07	1.13357e+08	0.788644	1.17222	0.846761	1.01084	0.733191	0.818773	0.935874	0.854269	-0.163453	-0.388465
A0FGR8	ESYT2	Extended synaptotagmin-2 OS=Homo sapiens GN=ESYT2 PE=1 SV=1	0.001951	3.3283e+08	3.22166e+08	3.64996e+08	3.15234e+08	2.72386e+08	3.29948e+08	2.85183e+08	1.70676e+08	2.85135e+08	0.947132	0.845485	0.903976	0.856843	0.529776	0.7812	0.898864	0.722606	-0.262965	-0.80128
A0MZ66	SHTN1	Shootin-1 OS=Homo sapiens GN=KIAA1598 PE=1 SV=4	0.00953549	2.48224e+08	2.59929e+08	2.82608e+08	2.70926e+08	2.6343e+08	2.74497e+08	2.53232e+08	1.74456e+08	2.75915e+08	1.09146	1.01347	0.971301	1.02017	0.671169	0.976319	1.02541	0.88922	0.0618805	-0.28957
A1L0T0	ILVBL	Acetolactate synthase-like protein OS=Homo sapiens GN=ILVBL PE=1 SV=2	0.240424	529978414	4.24958e+08	6.15775e+08	5.57384e+08	5.24822e+08	6.45716e+08	4.88915e+08	290640592	5.81388e+08	1.05171	1.235	1.04862	0.922518	0.683928	0.944157	1.11178	0.850201	0.26133	-0.400237
A1L188	NDUFAF8	Uncharacterized protein C17orf89 OS=Homo sapiens GN=C17orf89 PE=1 SV=1	0.0154171	8.37332e+07	8.72533e+07	9.7123e+07	74286750	73199549	6.91808e+07	7.69578e+07	5.55229e+07	5.36835e+07	0.887184	0.838931	0.7123	0.919083	0.636342	0.552737	0.812805	0.702721	-0.511175	-0.870101
A2RRP1	NBAS	Neuroblastoma-amplified sequence OS=Homo sapiens GN=NBAS PE=1 SV=2	0.209224	1.14239e+08	1.47813e+08	1.56346e+08	1.11904e+08	1.21958e+08	1.34844e+08	5.47299e+07	6.19536e+07	1.51161e+08	0.979563	0.825083	0.86247	0.479082	0.419136	0.966834	0.889038	0.621684	-0.290074	-1.17229
A2VDF0	FUOM	Protein fucU homolog OS=Homo sapiens GN=C10orf125 PE=2 SV=2	0.234747	2.2807e+07	2.04601e+07	6.95283e+06	2.55377e+07	1.99603e+07	2.74971e+07	24703546	1.45984e+07	3.08779e+07	1.11973	0.975572	3.95481	1.08315	0.713503	4.44106	2.0167	2.07924	1.73002	1.80534
A3KMH1	VWA8	Uncharacterized protein KIAA0564 OS=Homo sapiens GN=KIAA0564 PE=1 SV=2	0.0295423	2.17274e+08	2.10912e+08	2.50212e+08	2.33722e+08	2.10629e+08	2.30154e+08	188913879	1.39525e+08	2.29769e+08	1.0757	0.998657	0.919835	0.869471	0.661531	0.918299	0.998064	0.816434	-0.00478002	-0.500189
A3KN83	SBNO1	Protein strawberry notch homolog 1 OS=Homo sapiens GN=SBNO1 PE=1 SV=1	0.0116845	7.85076e+07	6.19653e+07	7.54526e+07	2.98248e+07	4.55929e+07	4.4956e+07	4.59864e+07	3.04922e+07	6.04642e+07	0.379898	0.735782	0.595818	0.585757	0.492085	0.801353	0.570499	0.626398	-1.3842	-1.15366
A4D1E9	GTPBP10	GTP-binding protein 10 OS=Homo sapiens GN=GTPBP10 PE=1 SV=1	0.3436	2.55893e+08	1.81194e+08	2.52644e+08	1.72117e+08	2.47095e+08	1.98138e+08	2.84621e+08	1.51689e+08	2.40022e+08	0.672615	1.3637	0.784258	1.11227	0.837164	0.95004	0.940191	0.96649	-0.152103	-0.084063
A5YKK6	CNOT1	CCR4-NOT transcription complex subunit 1 OS=Homo sapiens GN=CNOT1 PE=1 SV=2	0.00691307	1.38784e+08	1.24654e+08	1.38001e+08	9.55884e+07	1.16602e+08	1.1691e+08	1.25937e+08	9.71847e+07	1.18859e+08	0.688756	0.935403	0.847167	0.907433	0.779635	0.861296	0.823775	0.849455	-0.478111	-0.402403
A6NCE7	MAP1LC3B2	Microtubule-associated proteins 1A/1B light chain 3 beta 2 OS=Homo sapiens GN=MAP1LC3B2 PE=2 SV=1	0.00832984	1.43373e+08	1.31933e+08	1.58833e+08	1.80783e+08	1.71664e+08	1.91281e+08	1.41309e+08	7.88835e+07	1.63436e+08	1.26092	1.30114	1.20428	0.9856	0.597905	1.02898	1.25545	0.870828	0.56107	-0.341117
A6NCS6	C2orf72	Uncharacterized protein C2orf72 OS=Homo sapiens GN=C2orf72 PE=2 SV=1	0.000105263	1.96772e+08	1.85015e+08	1.88593e+08	2.30569e+08	1.8119e+08	1.98127e+08	1.62894e+08	9.67905e+07	1.64417e+08	1.17176	0.979325	1.05055	0.827833	0.52315	0.871808	1.06721	0.74093	0.16043	-0.739518
A6NFE2	SMCO2	Uncharacterized protein C12orf70 OS=Homo sapiens GN=C12orf70 PE=2 SV=1	0.00952886	9.54993e+07	97454559	1.18018e+08	6.73674e+07	51040223	6.68444e+07	9.52466e+07	4.82993e+07	131242273	0.705423	0.523734	0.566393	0.997354	0.495609	1.11206	0.598517	0.86834	-1.26596	-0.348174
A6NH11	GLTPD2	Glycolipid transfer protein domain-containing protein 2 OS=Homo sapiens GN=GLTPD2 PE=1 SV=1	0.0902086	3.43272e+07	3.24785e+07	5.30141e+07	2.6966e+07	2.39681e+07	2.73445e+07	2.63475e+07	1.9969e+07	4.41476e+07	0.785557	0.737969	0.515796	0.767539	0.614839	0.832752	0.679774	0.738377	-0.95198	-0.748033
A6NHL2	TUBAL3	Tubulin alpha chain-like 3 OS=Homo sapiens GN=TUBAL3 PE=1 SV=2	0.257246	1.51393e+09	1474434352	1.5691e+09	1542575856	1.38139e+09	1.51873e+09	1604648240	1.06812e+09	1489348970	1.01892	0.936898	0.967899	1.05992	0.724426	0.949172	0.974573	0.911174	-0.0635205	-0.229419
A6NHR9	SMCHD1	Structural maintenance of chromosomes flexible hinge domain-containing protein 1 OS=Homo sapiens GN=SMCHD1 PE=1 SV=2	0.00565878	2.13489e+08	1.93162e+08	212648460	1.81044e+08	1.56744e+08	2.08966e+08	2.03777e+08	1.90232e+08	2.09618e+08	0.848028	0.811466	0.982682	0.954509	0.984835	0.985747	0.880725	0.97503	-0.313244	-0.0623651
A6NJ78	METTL15	Putative S-adenosyl-L-methionine-dependent methyltransferase METT5D1 OS=Homo sapiens GN=METT5D1 PE=2 SV=1	0.331514	7.44446e+07	7.09953e+07	5.87719e+07	7.38572e+07	6.24199e+07	7.80065e+07	6.71959e+07	3.26013e+07	6.7043e+07	0.99211	0.879212	1.32728	0.90263	0.459204	1.14073	1.0662	0.834189	0.15809	-0.447131
A6NL28	#N/A	Putative tropomyosin alpha-3 chain-like protein OS=Homo sapiens PE=5 SV=2	0.000764705	2512422908	2798627874	3.03957e+09	2303247832	1354891436	2216235600	1.08434e+09	7.59227e+08	1.14363e+09	0.916744	0.484127	0.729127	0.43159	0.271286	0.376247	0.709999	0.359708	-0.844688	-2.52171
B1AK53	ESPN	Espin OS=Homo sapiens GN=ESPN PE=1 SV=1	0.00345355	3.25457e+08	3.2187e+08	4.086e+08	2.39951e+08	1.55155e+08	2.31765e+08	3.01804e+08	1.85904e+08	3.67539e+08	0.737272	0.482044	0.567218	0.927324	0.577576	0.899508	0.595511	0.801469	-1.27837	-0.545814
B2RUZ4	SMIM1	Uncharacterized protein LOC388588 OS=Homo sapiens PE=1 SV=1	0.00933396	1.45325e+08	142735892	1.21306e+08	8.97632e+07	9.15996e+07	1.09818e+08	7.99724e+07	2.89663e+07	9.78608e+07	0.617672	0.641742	0.905292	0.550301	0.202937	0.806725	0.721569	0.519987	-0.804822	-1.61284
O00116	AGPS	Alkyldihydroxyacetonephosphate synthase, peroxisomal OS=Homo sapiens GN=AGPS PE=1 SV=1	0.0551006	4.50725e+07	6.17874e+07	5.21316e+07	2.35085e+07	4.29871e+07	32758142	1.78809e+07	2.15172e+07	7.21892e+07	0.521571	0.695726	0.628374	0.396713	0.348245	1.38475	0.615224	0.709902	-1.19805	-0.845025
O00139	KIF2A	Kinesin-like protein KIF2A OS=Homo sapiens GN=KIF2A PE=1 SV=3	0.00161415	9.8625e+07	9.39854e+07	9.16813e+07	6.68285e+07	7.48455e+07	9.23257e+07	7.81734e+07	6.5063e+07	8.63949e+07	0.677602	0.796353	1.00703	0.792633	0.692267	0.94234	0.826994	0.80908	-0.468492	-0.522505
O00148	DDX39A	ATP-dependent RNA helicase DDX39 OS=Homo sapiens GN=DDX39 PE=1 SV=2	0.00694846	3.6414e+08	351443549	3.08082e+08	3.24488e+08	325101064	3.63508e+08	3.6669e+08	2.29845e+08	3.69625e+08	0.891108	0.925045	1.17991	1.007	0.654003	1.19976	0.998687	0.953589	-0.00324079	-0.117205
O00151	PDLIM1	PDZ and LIM domain protein 1 OS=Homo sapiens GN=PDLIM1 PE=1 SV=4	0.00445209	1.12971e+09	1373079188	1.39704e+09	1.09586e+09	1272494305	1.10656e+09	1.32375e+09	9.00842e+08	1.49443e+09	0.970033	0.926745	0.792075	1.17176	0.656074	1.06971	0.896284	0.965849	-0.270055	-0.0856996
O00154	ACOT7	Cytosolic acyl coenzyme A thioester hydrolase OS=Homo sapiens GN=ACOT7 PE=1 SV=3	0.00142402	275534035	2.7797e+08	2.994e+08	3.59248e+08	3.44621e+08	3.54017e+08	388506849	2.2577e+08	3.93079e+08	1.30383	1.23978	1.18242	1.41001	0.812211	1.31289	1.24201	1.17837	0.534521	0.404802
O00159	MYO1C	Myosin-Ic OS=Homo sapiens GN=MYO1C PE=1 SV=3	0.00377589	8.02813e+08	7.35673e+08	9.24484e+08	7.1078e+08	5.86868e+08	7.58674e+08	7.41162e+08	5.34618e+08	7.53973e+08	0.885362	0.79773	0.820646	0.923206	0.726706	0.815561	0.834579	0.821824	-0.445976	-0.483959
O00161	SNAP23	Synaptosomal-associated protein 23 OS=Homo sapiens GN=SNAP23 PE=1 SV=1	0.0149789	4.76491e+08	4.58288e+08	5.90046e+08	3.05572e+08	3.55621e+08	2.65831e+08	4.79356e+08	331480218	4.54071e+08	0.641298	0.775976	0.450525	1.00601	0.723301	0.769552	0.622599	0.832955	-1.16866	-0.450779
O00165	HAX1	HCLS1-associated protein X-1 OS=Homo sapiens GN=HAX1 PE=1 SV=2	0.0122183	1.45943e+08	1.51542e+08	1.40346e+08	1.35806e+08	1.20603e+08	1.20702e+08	1.48304e+08	9.46173e+07	1.45617e+08	0.930537	0.795839	0.860031	1.01618	0.624363	1.03756	0.862136	0.892699	-0.365857	-0.27994
O00170	AIP	AH receptor-interacting protein OS=Homo sapiens GN=AIP PE=1 SV=2	0.0978813	110117268	108920270	1.48932e+08	140059394	1.21982e+08	1.6197e+08	1.34953e+08	9.14632e+07	156421764	1.27191	1.11992	1.08754	1.22554	0.839726	1.05029	1.15979	1.03852	0.365606	0.0932147
O00178	GTPBP1	GTP-binding protein 1 OS=Homo sapiens GN=GTPBP1 PE=1 SV=3	0.0429483	1.30458e+08	1.75953e+08	2.0352e+08	1.09963e+08	1.07595e+08	1.04889e+08	2.06948e+08	1.18649e+08	262668830	0.8429	0.611497	0.515375	1.58632	0.674318	1.29063	0.656591	1.18376	-1.03756	0.416045
O00186	STXBP3	Syntaxin-binding protein 3 OS=Homo sapiens GN=STXBP3 PE=1 SV=2	0.0207376	2.09607e+08	2.21598e+08	2.53123e+08	1.9149e+08	1.75487e+08	2.26105e+08	1.70025e+08	1.16652e+08	1.96996e+08	0.913567	0.791918	0.893264	0.81116	0.526413	0.778261	0.86625	0.705278	-0.354117	-0.861142
O00192	ARVCF	Armadillo repeat protein deleted in velo-cardio-facial syndrome OS=Homo sapiens GN=ARVCF PE=1 SV=1	0.195147	2.85678e+07	3.25697e+07	4.70353e+07	3.40035e+07	2.62956e+07	2.73714e+07	3.47315e+07	1.91316e+07	3.16034e+07	1.19027	0.807365	0.581935	1.21576	0.587406	0.671908	0.859857	0.825023	-0.372386	-0.474377
O00193	SMAP	Small acidic protein OS=Homo sapiens GN=SMAP PE=1 SV=1	0.0015364	2.31861e+08	2.74781e+08	2.70175e+08	183662612	1.84946e+08	1.96631e+08	269073811	1.80681e+08	2.25337e+08	0.792123	0.673066	0.727791	1.1605	0.657543	0.834042	0.730993	0.884027	-0.772818	-0.304016
O00203	AP3B1	AP-3 complex subunit beta-1 OS=Homo sapiens GN=AP3B1 PE=1 SV=3	0.000810419	3.62868e+08	3.49777e+08	3.82371e+08	3.38381e+08	7.82993e+08	8.41575e+08	2.97799e+08	2.2146e+08	2.80151e+08	0.932517	2.23855	2.20094	0.820681	0.633146	0.732668	1.79067	0.728832	1.43684	-0.780123
O00214	LGALS8	Galectin-8 OS=Homo sapiens GN=LGALS8 PE=1 SV=3	0.0132791	9.03211e+07	1.02182e+08	8.57478e+07	8.87869e+07	8.97198e+07	1.05229e+08	4.95403e+07	5.56971e+07	8.32072e+07	0.983014	0.878037	1.2272	0.548491	0.545076	0.970371	1.02942	0.687979	0.0715012	-0.922389
O00217	NDUFS8	NADH dehydrogenase [ubiquinone] iron-sulfur protein 8, mitochondrial OS=Homo sapiens GN=NDUFS8 PE=1 SV=1	0.00695219	9.08401e+08	9.16221e+08	1.02396e+09	983286861	8.05624e+08	9.1992e+08	8.35377e+08	5.55823e+08	9.0273e+08	1.08244	0.87929	0.898394	0.919613	0.606647	0.881606	0.953374	0.802622	-0.117762	-0.542269
O00220	TNFRSF10A	Tumor necrosis factor receptor superfamily member 10A OS=Homo sapiens GN=TNFRSF10A PE=1 SV=2	0.1233	21124414	1.81234e+07	1.50228e+07	1.3332e+07	2.07645e+07	6.45218e+07	1.44067e+07	1.46268e+07	3.83744e+07	0.631118	1.14573	4.29494	0.681991	0.80707	2.55441	2.02393	1.34783	1.73884	0.736173
O00231	PSMD11	26S proteasome non-ATPase regulatory subunit 11 OS=Homo sapiens GN=PSMD11 PE=1 SV=3	9.99314e-05	8.67113e+08	8.77949e+08	9.28433e+08	9.37862e+08	8.92131e+08	9.33241e+08	968423121	615557238	9.55447e+08	1.08159	1.01615	1.00518	1.11684	0.701131	1.0291	1.03431	0.949021	0.0831944	-0.129047
O00232	PSMD12	26S proteasome non-ATPase regulatory subunit 12 OS=Homo sapiens GN=PSMD12 PE=1 SV=3	0.00354305	6.61026e+08	6.69278e+08	7.60649e+08	7.95393e+08	641269150	7.31805e+08	7.49594e+08	4.51556e+08	7.2157e+08	1.20327	0.958151	0.962079	1.13399	0.674692	0.948624	1.04117	0.919101	0.0994961	-0.208057
O00233	PSMD9	26S proteasome non-ATPase regulatory subunit 9 OS=Homo sapiens GN=PSMD9 PE=1 SV=2	0.00127729	1.44793e+08	1.3346e+08	1.24315e+08	9.37731e+07	1.85967e+08	1.8693e+08	1.1152e+08	1.14919e+08	6.55892e+07	0.647637	1.39343	1.50368	0.770202	0.861075	0.527603	1.18158	0.719627	0.411509	-0.811469
O00244	ATOX1	Copper transport protein ATOX1 OS=Homo sapiens GN=ATOX1 PE=1 SV=1	0.0272003	1.65279e+08	1.65404e+08	248882040	1.88751e+08	204865985	154058226	1.66283e+08	2.41868e+08	1.65769e+08	1.14202	1.23858	0.619001	1.00607	1.46228	0.666054	0.999866	1.0448	-0.000331738	0.108097
O00255	MEN1	Menin OS=Homo sapiens GN=MEN1 PE=1 SV=3	0.152512	4.96754e+07	5.24669e+07	1.56358e+08	2.26519e+07	3.35608e+07	2.42865e+07	5.95455e+06	1.98411e+07	3.97995e+07	0.455998	0.639657	0.155326	0.119869	0.378165	0.25454	0.416994	0.250858	-2.15724	-3.41057
O00264	PGRMC1	Membrane-associated progesterone receptor component 1 OS=Homo sapiens GN=PGRMC1 PE=1 SV=3	0.0264074	1.68278e+09	1.76718e+09	1.90641e+09	1940336733	1.87453e+09	1795247114	1.72481e+09	1.09319e+09	1.7642e+09	1.15305	1.06075	0.94169	1.02498	0.618607	0.925403	1.05183	0.856329	0.124628	-0.382526
O00267	SUPT5H	Transcription elongation factor SPT5 OS=Homo sapiens GN=SUPT5H PE=1 SV=1	0.0167244	3.13723e+08	2.72485e+08	360630376	2.35354e+08	2.58821e+08	2.68622e+08	2.77053e+08	2.09363e+08	2.95563e+08	0.750197	0.949853	0.744867	0.883115	0.768346	0.819572	0.814972	0.823678	-0.504609	-0.478404
O00268	TAF4	Transcription initiation factor TFIID subunit 4 OS=Homo sapiens GN=TAF4 PE=1 SV=2	0.0493203	5.72822e+07	5.86828e+07	6.85282e+07	4.21157e+07	75076884	4.55327e+07	5.57582e+07	3.72008e+07	1.05416e+08	0.735232	1.27937	0.664437	0.973395	0.633931	1.53829	0.893012	1.04854	-0.279074	0.116894
O00273	DFFA	DNA fragmentation factor subunit alpha OS=Homo sapiens GN=DFFA PE=1 SV=1	0.0321863	1.02292e+08	8.11178e+07	122734982	1.40337e+08	1.40898e+08	1.64784e+08	121680203	7.85809e+07	129163004	1.37193	1.73696	1.3426	1.18954	0.968725	1.05237	1.48383	1.07021	0.973268	0.16736
O00291	HIP1	Huntingtin-interacting protein 1 OS=Homo sapiens GN=HIP1 PE=1 SV=5	0.067631	2.8196e+08	3.29793e+08	5.91449e+07	6.96192e+06	1.90427e+07	2.15344e+07	1.34952e+07	2.27527e+07	2.20696e+07	0.0246912	0.0577414	0.364096	0.0478622	0.068991	0.373145	0.148843	0.163333	-4.69797	-4.46886
O00299	CLIC1	Chloride intracellular channel protein 1 OS=Homo sapiens GN=CLIC1 PE=1 SV=4	0.000179912	3057072552	3094847437	3.19907e+09	3.80153e+09	3407898286	3.74384e+09	3.5122e+09	2.20962e+09	3.28177e+09	1.24352	1.10115	1.17029	1.14888	0.713966	1.02585	1.17165	0.962898	0.390702	-0.0932459
O00303	EIF3F	Eukaryotic translation initiation factor 3 subunit F OS=Homo sapiens GN=EIF3F PE=1 SV=1	0.00602546	4.20797e+08	4.1739e+08	4.64229e+08	4.55e+08	5.45693e+08	6.20528e+08	5.42445e+08	3.35104e+08	6.16072e+08	1.08128	1.30739	1.33668	1.28909	0.802855	1.32709	1.24179	1.13968	0.534081	0.322458
O00330	PDHX	Pyruvate dehydrogenase protein X component, mitochondrial OS=Homo sapiens GN=PDHX PE=1 SV=3	0.0376426	3.36849e+08	3.13023e+08	4.41938e+08	4.34462e+08	380322683	3.67976e+08	3.01801e+08	2.73449e+08	3.37989e+08	1.28978	1.215	0.832644	0.895954	0.873576	0.76479	1.11248	0.844773	0.26288	-0.416033
O00399	DCTN6	Dynactin subunit 6 OS=Homo sapiens GN=DCTN6 PE=1 SV=1	0.0163659	1.00823e+08	119176135	140975368	9.25218e+07	1.08289e+08	1.0614e+08	1.25632e+08	4.88018e+07	1.03176e+08	0.91767	0.90865	0.752897	1.24607	0.409493	0.73187	0.859739	0.795812	-0.372724	-0.563284
O00400	SLC33A1	Acetyl-coenzyme A transporter 1 OS=Homo sapiens GN=SLC33A1 PE=1 SV=1	0.0598396	2.3249e+08	2.14003e+08	2.60372e+08	2.30252e+08	208331045	2.34728e+08	2.12109e+08	1.41526e+08	1.41968e+08	0.990372	0.973498	0.901511	0.912334	0.661326	0.545252	0.955127	0.706304	-0.113231	-0.857557
O00401	WASL	Neural Wiskott-Aldrich syndrome protein OS=Homo sapiens GN=WASL PE=1 SV=2	0.0142241	7.65895e+07	7.2086e+07	6.49943e+07	4.93749e+07	5.9504e+07	6.10851e+07	6.68419e+07	3.57745e+07	6.22922e+07	0.64467	0.825458	0.939853	0.872729	0.496275	0.958426	0.803327	0.77581	-0.540104	-0.626065
O00410	IPO5	Importin-5 OS=Homo sapiens GN=IPO5 PE=1 SV=4	0.00129447	7.37572e+08	7.08399e+08	7.93318e+08	9.2734e+08	6.14558e+08	8.62126e+08	7.45356e+08	4.94621e+08	8.30177e+08	1.25729	0.867531	1.08673	1.01055	0.698224	1.04646	1.07052	0.918414	0.16806	-0.209901
O00411	POLRMT	DNA-directed RNA polymerase, mitochondrial OS=Homo sapiens GN=POLRMT PE=1 SV=2	0.0277218	2.48693e+08	3.56211e+08	4.72773e+08	3.53464e+08	2.97405e+08	3.17294e+08	2.26429e+08	1.4901e+08	3.14586e+08	1.42129	0.834913	0.671134	0.910475	0.418319	0.665407	0.975778	0.664733	-0.0604747	-1.00716
O00422	SAP18	Histone deacetylase complex subunit SAP18 OS=Homo sapiens GN=SAP18 PE=1 SV=1	0.00583029	1.36743e+09	1.36058e+09	1.56645e+09	1.43373e+09	1.1627e+09	1.30635e+09	1.04013e+09	5.71565e+08	1.3394e+09	1.04849	0.854558	0.833954	0.760646	0.420088	0.855054	0.912333	0.678596	-0.226283	-0.956258
O00425	IGF2BP3	Insulin-like growth factor 2 mRNA-binding protein 3 OS=Homo sapiens GN=IGF2BP3 PE=1 SV=2	0.250895	3.9375e+08	4.19032e+08	5.35971e+08	5.38595e+08	4.35317e+08	497756792	4.26173e+08	3.45388e+08	4.95334e+08	1.36786	1.03886	0.928701	1.08235	0.824251	0.92418	1.11181	0.943592	0.261399	-0.143197
O00429	DNM1L	Dynamin-1-like protein OS=Homo sapiens GN=DNM1L PE=1 SV=2	0.0133896	2.3235e+08	2.29191e+08	2.76917e+08	2.09151e+08	1.78693e+08	2.23377e+08	1.7896e+08	1.23769e+08	2.0532e+08	0.900154	0.779667	0.806656	0.770218	0.540027	0.74145	0.828825	0.683898	-0.463038	-0.937063
O00442	RTCA	RNA 3'-terminal phosphate cyclase OS=Homo sapiens GN=RTCD1 PE=1 SV=1	0.00880633	1.7712e+08	1.51078e+08	178280730	1.56097e+08	1.64223e+08	1.87232e+08	1.9257e+08	8.38786e+07	194358992	0.881307	1.08701	1.05021	1.08723	0.555201	1.09019	1.00618	0.910873	0.0151835	-0.230234
O00461	GOLIM4	Golgi integral membrane protein 4 OS=Homo sapiens GN=GOLIM4 PE=1 SV=1	0.0579745	5.96427e+08	6.61862e+08	2.95665e+08	2.83466e+08	2.74484e+08	2.77714e+08	2.01174e+08	1.78803e+08	2.6186e+08	0.475274	0.414715	0.939287	0.337298	0.270152	0.885666	0.609759	0.497706	-1.22006	-1.72085
O00468	AGRN	Agrin OS=Homo sapiens GN=AGRN PE=1 SV=4	0.000801111	7.33786e+07	7.11092e+07	7.72519e+07	4.61766e+07	3.94133e+07	4.82375e+07	5.1865e+07	3.88479e+07	7.06603e+07	0.629293	0.554264	0.624418	0.706813	0.546312	0.914674	0.602658	0.7226	-1.24895	-0.801301
O00469	PLOD2	Procollagen-lysine,2-oxoglutarate 5-dioxygenase 2 OS=Homo sapiens GN=PLOD2 PE=1 SV=2	0.101035	4.26075e+08	4.23007e+08	5.97802e+08	3.66847e+08	326410202	3.73922e+08	3.8888e+08	2.75914e+08	4.21613e+08	0.860991	0.771643	0.625494	0.912703	0.652267	0.705272	0.752709	0.756747	-0.700618	-0.687422
O00471	EXOC5	Exocyst complex component 5 OS=Homo sapiens GN=EXOC5 PE=1 SV=1	0.37971	7.07323e+07	3.47643e+07	1.0974e+08	1.1555e+08	7.24603e+07	1.01493e+08	4.63075e+07	4.29293e+07	6.29482e+07	1.63363	2.08433	0.924854	0.654688	1.23487	0.573613	1.5476	0.821056	1.07705	-0.486266
O00483	NDUFA4	NADH dehydrogenase [ubiquinone] 1 alpha subcomplex subunit 4 OS=Homo sapiens GN=NDUFA4 PE=1 SV=1	0.000677827	2.03092e+09	2.02482e+09	2187073468	1988991555	1.71113e+09	1.85418e+09	1.20728e+09	1.17982e+09	1.74112e+09	0.979355	0.845076	0.847789	0.594449	0.582679	0.796095	0.89074	0.657741	-0.285359	-1.03324
O00487	PSMD14	26S proteasome non-ATPase regulatory subunit 14 OS=Homo sapiens GN=PSMD14 PE=1 SV=1	0.00348666	5.31893e+08	5.53077e+08	6.17452e+08	688278979	598712815	6.76323e+08	6.28072e+08	3.58458e+08	6.6761e+08	1.29402	1.08251	1.09535	1.18082	0.648117	1.08123	1.15729	0.970058	0.360284	-0.0749745
O00499	BIN1	Myc box-dependent-interacting protein 1 OS=Homo sapiens GN=BIN1 PE=1 SV=1	0.0371027	8.49839e+07	7.07847e+07	6.39858e+07	4.5083e+07	97325874	1.13705e+08	8.12559e+07	3.52585e+07	6.97098e+07	0.530488	1.37496	1.77704	0.956132	0.49811	1.08946	1.2275	0.8479	0.505533	-0.406922
O00505	KPNA3	Importin subunit alpha-3 OS=Homo sapiens GN=KPNA3 PE=1 SV=2	0.0511402	3.7268e+08	6.62509e+08	3.71065e+08	3.48795e+08	3.05394e+08	3.67585e+08	3.53927e+08	2.3779e+08	4.38166e+08	0.93591	0.460966	0.99062	0.949681	0.358924	1.18083	0.795832	0.829812	-0.563222	-0.460104
O00515	LAD1	Ladinin-1 OS=Homo sapiens GN=LAD1 PE=1 SV=2	0.000178582	3.00385e+08	2.75643e+08	2.98605e+08	2.21699e+08	2.17414e+08	2.44695e+08	3.11864e+08	2.12698e+08	3.48676e+08	0.738048	0.788752	0.81946	1.03821	0.771644	1.16768	0.782087	0.992513	-0.606192	-0.0185353
O00541	PES1	Pescadillo homolog OS=Homo sapiens GN=PES1 PE=1 SV=1	0.0102833	9.09411e+08	9.2733e+08	1.08365e+09	8.135e+08	7.9258e+08	9.20414e+08	7.55321e+08	4.37651e+08	893766119	0.894535	0.854691	0.849363	0.83056	0.471948	0.824773	0.866196	0.709094	-0.354269	-0.847836
O00560	SDCBP	Syntenin-1 OS=Homo sapiens GN=SDCBP PE=1 SV=1	0.00173542	6.79698e+07	6.07665e+07	6.69713e+07	7.7968e+07	7.17792e+07	7.57647e+07	7.24395e+07	5.35301e+07	9.77759e+07	1.1471	1.18123	1.1313	1.06576	0.880915	1.45997	1.15321	1.13555	0.35157	0.313503
O00566	MPHOSPH10	U3 small nucleolar ribonucleoprotein protein MPP10 OS=Homo sapiens GN=MPHOSPH10 PE=1 SV=2	0.0271049	4.57106e+08	4.88377e+08	5.87118e+08	4.84913e+08	4.4163e+08	5.52031e+08	4.36297e+08	2.716e+08	5.21416e+08	1.06083	0.904281	0.940239	0.954475	0.556127	0.888094	0.968451	0.799565	-0.0790638	-0.55168
O00567	NOP56	Nucleolar protein 56 OS=Homo sapiens GN=NOP56 PE=1 SV=4	0.019262	2.74613e+09	2.9367e+09	3.24e+09	2.98231e+09	2.84944e+09	2.83998e+09	2.95406e+09	1.78486e+09	2.93011e+09	1.086	0.970288	0.876538	1.07572	0.607778	0.904356	0.97761	0.862617	-0.0558474	-0.364483
O00571	DDX3X	ATP-dependent RNA helicase DDX3X OS=Homo sapiens GN=DDX3X PE=1 SV=3	0.0728294	7.85026e+08	1.31749e+09	1.71015e+09	9.87668e+08	7.23321e+08	1.31492e+09	1.25728e+09	4.65376e+08	9.12219e+08	1.25813	0.549014	0.768893	1.60158	0.353229	0.533416	0.85868	0.829409	-0.375763	-0.461301
O00584	RNASET2	Ribonuclease T2 OS=Homo sapiens GN=RNASET2 PE=1 SV=2	0.02601	2.26041e+08	2.11589e+08	2.19589e+08	1.99512e+08	1.75791e+08	1.63006e+08	2.10008e+08	1.61525e+08	1.67324e+08	0.882639	0.830812	0.742321	0.929073	0.763387	0.761986	0.818591	0.818149	-0.493683	-0.495015
O00625	PIR	Pirin OS=Homo sapiens GN=PIR PE=1 SV=1	0.369017	3.39842e+08	1.47914e+08	1.92708e+08	1.37559e+08	1.45102e+08	3.82164e+08	390175035	8.79152e+07	2.15244e+08	0.404774	0.980989	1.98312	1.14811	0.594366	1.11694	1.12296	0.953139	0.286016	-0.11837
O00629	KPNA4	Importin subunit alpha-4 OS=Homo sapiens GN=KPNA4 PE=1 SV=1	0.508147	1.80336e+08	1.42191e+08	6.88623e+07	2.00316e+08	1.78528e+08	1.01967e+08	1.64864e+08	1.45718e+08	1.37014e+08	1.11079	1.25555	1.48075	0.914204	1.0248	1.98969	1.28236	1.30956	0.613377	0.665147
O00743	PPP6C	Serine/threonine-protein phosphatase 6 catalytic subunit OS=Homo sapiens GN=PPP6C PE=1 SV=1	0.0284499	6.88064e+07	6.77373e+07	9.36912e+07	1.06881e+08	30996994	1.39683e+08	4.94576e+07	1.7508e+07	36724617	1.55336	0.457606	1.49089	0.718795	0.258469	0.391975	1.16728	0.456413	0.381487	-1.93446
O00748	CES2	Carboxylesterase 2 OS=Homo sapiens GN=CES2 PE=1 SV=1	0.0192484	7.76939e+08	6.60625e+08	7.69086e+08	6.65513e+08	617926744	7.56773e+08	1.0558e+09	476390701	6.96547e+08	0.856583	0.935367	0.98399	1.35893	0.721121	0.905681	0.925313	0.995243	-0.191441	-0.0117592
O00754	MAN2B1	Lysosomal alpha-mannosidase OS=Homo sapiens GN=MAN2B1 PE=1 SV=3	0.121125	1.00227e+08	1.20924e+08	1.69342e+08	112171428	1.03972e+08	1.21487e+08	1.03572e+08	8.31551e+07	7.04265e+07	1.11918	0.859808	0.717408	1.03338	0.687662	0.415883	0.898798	0.712308	-0.263146	-0.836681
O00762	UBE2C	Ubiquitin-conjugating enzyme E2 C OS=Homo sapiens GN=UBE2C PE=1 SV=1	9.65327e-05	207562178	1.99432e+08	205776472	7.61878e+07	8.80021e+07	1.00357e+08	1.35987e+08	1.37311e+08	2.09495e+08	0.36706	0.441265	0.4877	0.655163	0.688513	1.01807	0.432008	0.787248	-2.06999	-0.589969
O00764	PDXK	Pyridoxal kinase OS=Homo sapiens GN=PDXK PE=1 SV=1	0.000721281	2.43445e+08	2.49545e+08	2.69167e+08	2.73611e+08	2.56356e+08	2.8909e+08	2.86084e+08	1.56171e+08	3.06518e+08	1.12391	1.02729	1.07402	1.17515	0.625821	1.13877	1.07508	0.979913	0.178537	-0.0500445
O00767	SCD	Acyl-CoA desaturase OS=Homo sapiens GN=SCD PE=1 SV=2	8.93138e-05	1115435723	1.0833e+09	1.09762e+09	6.10177e+08	5.8898e+08	4.56667e+08	908207812	5.71971e+08	9.96002e+08	0.54703	0.543692	0.416052	0.814218	0.52799	0.907418	0.502258	0.749876	-1.6984	-0.709921
O14497	ARID1A	AT-rich interactive domain-containing protein 1A OS=Homo sapiens GN=ARID1A PE=1 SV=3	0.0313031	1.52753e+08	1.57614e+08	1.79648e+08	1.4059e+08	1.33723e+08	1.34965e+08	1.54603e+08	7.78365e+07	2.1503e+08	0.920374	0.848427	0.751276	1.01211	0.493844	1.19695	0.840026	0.900968	-0.429933	-0.257199
O14530	TXNDC9	Thioredoxin domain-containing protein 9 OS=Homo sapiens GN=TXNDC9 PE=1 SV=2	0.109325	6.79463e+07	5.45315e+07	4.82798e+07	6.82483e+07	6.02758e+07	6.65341e+07	4.80743e+07	3.52999e+07	7.95111e+07	1.00444	1.10534	1.37809	0.707534	0.64733	1.64688	1.16263	1.00058	0.371626	0.00143501
O14548	COX7A2L	Cytochrome c oxidase subunit 7A-related protein, mitochondrial OS=Homo sapiens GN=COX7A2L PE=1 SV=2	0.0101046	7.72868e+08	8.27707e+08	9.68724e+08	6.86409e+08	6.9789e+08	7.63258e+08	6.93637e+08	4.42139e+08	7.29841e+08	0.888133	0.843161	0.7879	0.897485	0.534174	0.753404	0.839731	0.728354	-0.430797	-0.781739
O14561	NDUFAB1	Acyl carrier protein, mitochondrial OS=Homo sapiens GN=NDUFAB1 PE=1 SV=3	0.193797	2.05565e+09	2.23714e+09	2.24499e+09	1.99046e+09	1.61914e+09	2.14764e+09	2.41621e+09	1.31702e+09	2.22167e+09	0.968283	0.723755	0.956639	1.1754	0.588707	0.989613	0.882892	0.917905	-0.307183	-0.211267
O14562	UBFD1	Ubiquitin domain-containing protein UBFD1 OS=Homo sapiens GN=UBFD1 PE=1 SV=1	0.174933	6.00966e+07	5.9871e+07	2.36393e+08	1.79174e+08	1.12666e+08	2.66814e+08	1.14878e+08	8.10925e+07	123622208	2.98144	1.88182	1.12869	1.91156	1.35445	0.522952	1.99731	1.26299	1.7062	0.575835
O14579	COPE	Coatomer subunit epsilon OS=Homo sapiens GN=COPE PE=1 SV=3	6.32764e-05	1.21845e+09	1.10894e+09	1.18053e+09	9.01224e+08	8.77021e+08	9.69146e+08	1165646566	6.38654e+08	1.1233e+09	0.739647	0.790867	0.82094	0.956662	0.575916	0.951521	0.783818	0.828033	-0.60074	-0.465397
O14617	AP3D1	AP-3 complex subunit delta-1 OS=Homo sapiens GN=AP3D1 PE=1 SV=1	0.0709408	8.45726e+08	7.9378e+08	3.54603e+08	3.38603e+08	7.47454e+08	804242825	2.72644e+08	3.70704e+08	7.80819e+08	0.400369	0.941639	2.26801	0.322378	0.467011	2.20195	1.20334	0.997114	0.456514	-0.00712791
O14618	CCS	Copper chaperone for superoxide dismutase OS=Homo sapiens GN=CCS PE=1 SV=1	0.0405342	1.00892e+08	4.92882e+07	57692424	1.27984e+08	109163784	1.52185e+08	119049468	60354441	1.14775e+08	1.26853	2.2148	2.63788	1.17997	1.22452	1.98943	2.0404	1.46464	1.75884	0.941162
O14639	ABLIM1	Actin-binding LIM protein 1 OS=Homo sapiens GN=ABLIM1 PE=1 SV=3	0.0182004	1.08002e+08	9.56957e+07	1.41672e+08	7.02586e+07	9.37089e+07	1.02702e+08	7.96231e+07	8.85066e+07	160807485	0.65053	0.979238	0.724933	0.737236	0.924875	1.13507	0.7849	0.932394	-0.597335	-0.17264
O14646	CHD1	Chromodomain-helicase-DNA-binding protein 1 OS=Homo sapiens GN=CHD1 PE=1 SV=2	0.00796874	3.43944e+07	3.49764e+07	4.05592e+07	4.35707e+07	3.59676e+07	3.13052e+07	2.62058e+07	2.62692e+07	3.38496e+07	1.2668	1.02834	0.77184	0.761921	0.751055	0.834575	1.02233	0.782517	0.054455	-0.604836
O14647	CHD2	Chromodomain-helicase-DNA-binding protein 2 OS=Homo sapiens GN=CHD2 PE=1 SV=2	0.0816288	5.7856e+07	5.98202e+07	8.53159e+07	5.15553e+07	5.13764e+07	5.56708e+07	3.11823e+07	4.23724e+07	5.73633e+07	0.891097	0.858847	0.652526	0.538964	0.70833	0.672363	0.800823	0.639886	-0.547803	-1.10112
O14653	GOSR2	Golgi SNAP receptor complex member 2 OS=Homo sapiens GN=GOSR2 PE=1 SV=2	0.077194	5.76903e+07	7.00977e+07	1.03845e+08	6.67471e+07	5.97262e+07	9.00405e+07	7.37525e+07	7.99311e+07	8.71023e+07	1.15699	0.852041	0.867065	1.27842	1.14028	0.838771	0.958699	1.08582	-0.104024	0.203074
O14656	TOR1A	Torsin-1A OS=Homo sapiens GN=TOR1A PE=1 SV=1	0.177822	6.85899e+07	8.04754e+07	1.02976e+08	7.79562e+07	8.17741e+07	8.65621e+07	1.15701e+08	2.22565e+07	8.70239e+07	1.13655	1.01614	0.840608	1.68685	0.276562	0.845093	0.997767	0.936167	-0.00551403	-0.162681
O14672	ADAM10	Disintegrin and metalloproteinase domain-containing protein 10 OS=Homo sapiens GN=ADAM10 PE=1 SV=1	0.211822	4.64498e+08	4.7093e+08	3.09502e+08	4.60379e+08	4.12764e+08	2.61382e+08	4.21319e+08	2.64196e+08	4.30528e+08	0.991134	0.876487	0.844526	0.907041	0.561008	1.39104	0.904049	0.953029	-0.24878	-0.118654
O14734	ACOT8	Acyl-coenzyme A thioesterase 8 OS=Homo sapiens GN=ACOT8 PE=1 SV=1	0.151135	3.36707e+08	4.52166e+08	5.77402e+08	5.27915e+08	3.97082e+08	5.53297e+08	1.54707e+08	2.39913e+08	4.8138e+08	1.56788	0.878179	0.958253	0.45947	0.530587	0.8337	1.13477	0.607919	0.311816	-1.22751
O14735	CDIPT	CDP-diacylglycerol--inositol 3-phosphatidyltransferase OS=Homo sapiens GN=CDIPT PE=1 SV=1	0.00686866	2.98764e+08	2.8563e+08	3.45488e+08	2.95347e+08	2.70915e+08	3.08837e+08	2.61537e+08	2.00659e+08	2.93565e+08	0.988564	0.948481	0.893916	0.875396	0.702513	0.849713	0.943654	0.809208	-0.143036	-0.522116
O14737	PDCD5	Programmed cell death protein 5 OS=Homo sapiens GN=PDCD5 PE=1 SV=3	0.0361701	2.52937e+08	2.04206e+08	2.74138e+08	2.85015e+08	3.0776e+08	3.17714e+08	3.87412e+08	2.80793e+08	2.95864e+08	1.12682	1.5071	1.15896	1.53166	1.37505	1.07925	1.26429	1.32865	0.578384	0.700837
O14744	PRMT5	Protein arginine N-methyltransferase 5 OS=Homo sapiens GN=PRMT5 PE=1 SV=4	6.92883e-05	3.45995e+08	394397333	3.94773e+08	6.6903e+08	6.78803e+08	6.93684e+08	3.74191e+08	2.35247e+08	7.343e+08	1.93364	1.72111	1.75717	1.08149	0.596472	1.86006	1.80398	1.17934	1.4551	0.40683
O14745	SLC9A3R1	Na(+)/H(+) exchange regulatory cofactor NHE-RF1 OS=Homo sapiens GN=SLC9A3R1 PE=1 SV=4	0.00670445	1.84577e+09	1.93058e+09	2.19264e+09	1.66714e+09	1.64553e+09	1.57715e+09	1.6839e+09	1.26001e+09	1.66983e+09	0.903222	0.852349	0.719293	0.912303	0.652658	0.761563	0.824955	0.775508	-0.474583	-0.627026
O14773	TPP1	Tripeptidyl-peptidase 1 OS=Homo sapiens GN=TPP1 PE=1 SV=2	0.0180703	8.43769e+08	8.15311e+08	9.33407e+08	7.90631e+08	7.27931e+08	7.72316e+08	8.20685e+08	5.12089e+08	9.05604e+08	0.937023	0.892827	0.827416	0.972642	0.628091	0.970213	0.885755	0.856982	-0.299198	-0.380645
O14776	TCERG1	Transcription elongation regulator 1 OS=Homo sapiens GN=TCERG1 PE=1 SV=2	0.000394582	4.28988e+08	4.00991e+08	4.39713e+08	3.14325e+08	3.1714e+08	3.41077e+08	3.4383e+08	2.24888e+08	3.56052e+08	0.732713	0.790892	0.775681	0.801491	0.560832	0.809737	0.766429	0.72402	-0.65607	-0.79646
O14787	TNPO2	Transportin-2 OS=Homo sapiens GN=TNPO2 PE=1 SV=3	0.0267278	3.20915e+07	3.01224e+07	4.42498e+07	1.88831e+07	2.81519e+07	4.17799e+07	3.27453e+07	2.46841e+07	4.98237e+07	0.588415	0.934583	0.944181	1.02037	0.819459	1.12596	0.822393	0.988599	-0.482252	-0.02828
O14802	POLR3A	DNA-directed RNA polymerase III subunit RPC1 OS=Homo sapiens GN=POLR3A PE=1 SV=2	0.0660201	6.45372e+07	6.68096e+07	8.89951e+07	5.9254e+07	6.70589e+07	1.29149e+08	6.59194e+07	3.29362e+07	7.33135e+07	0.918138	1.00373	1.4512	1.02142	0.492986	0.823792	1.12435	0.779398	0.289074	-0.614684
O14818	PSMA7	Proteasome subunit alpha type-7 OS=Homo sapiens GN=PSMA7 PE=1 SV=1	0.000172795	1868461200	1835489056	1.98642e+09	1856314976	1.60325e+09	1.86275e+09	1.76642e+09	1.15314e+09	1.95196e+09	0.993499	0.873473	0.937742	0.94539	0.628245	0.982651	0.934905	0.852096	-0.166008	-0.394748
O14828	SCAMP3	Secretory carrier-associated membrane protein 3 OS=Homo sapiens GN=SCAMP3 PE=1 SV=3	0.00432844	3.22623e+08	2.58758e+08	2.75961e+08	250795712	2.85242e+08	2.69179e+08	4.18646e+08	3.16652e+08	3.98692e+08	0.777365	1.10235	0.975422	1.29763	1.22374	1.44474	0.951712	1.32204	-0.122065	0.688528
O14841	OPLAH	5-oxoprolinase OS=Homo sapiens GN=OPLAH PE=1 SV=3	0.0134273	5.96893e+07	6.6687e+07	7.50717e+07	5.96825e+07	5.38808e+07	5.90186e+07	6.07981e+07	5.75926e+07	7.41615e+07	0.999886	0.807966	0.786163	1.01858	0.863626	0.987875	0.864672	0.956693	-0.358614	-0.109191
O14874	BCKDK	[3-methyl-2-oxobutanoate dehydrogenase [lipoamide]] kinase, mitochondrial OS=Homo sapiens GN=BCKDK PE=1 SV=2	0.192763	3.49775e+08	223182836	5.32389e+07	3.4781e+08	3.37452e+08	344376839	1.50324e+08	2.04981e+08	2.40284e+08	0.99438	1.512	6.46852	0.429774	0.918442	4.51332	2.99163	1.95384	2.70262	1.65193
O14880	MGST3	Microsomal glutathione S-transferase 3 OS=Homo sapiens GN=MGST3 PE=1 SV=1	0.163808	597092967	6.06181e+08	7.54437e+08	6.87192e+08	628926659	7.11004e+08	4.37156e+08	2.96226e+08	644981508	1.1509	1.03752	0.94243	0.732141	0.488676	0.854918	1.04362	0.691912	0.105292	-0.908332
O14893	GEMIN2	Survival of motor neuron protein-interacting protein 1 OS=Homo sapiens GN=SIP1 PE=1 SV=1	0.338924	8.45393e+07	7.43981e+07	9.1196e+07	7.99529e+07	4.84586e+07	1.04387e+08	9.06939e+07	4.49162e+07	9.18028e+07	0.945748	0.651341	1.14465	1.0728	0.603728	1.00665	0.913912	0.894394	-0.222019	-0.27526
O14907	TAX1BP3	Tax1-binding protein 3 OS=Homo sapiens GN=TAX1BP3 PE=1 SV=2	0.00725669	1.69709e+08	1.71718e+08	1.75751e+08	2.01584e+08	362820028	1.85003e+08	1.8466e+08	2.45935e+08	1.99184e+08	1.18782	2.11288	1.05265	1.0881	1.4322	1.13333	1.45112	1.21788	0.918287	0.486136
O14908	GIPC1	PDZ domain-containing protein GIPC1 OS=Homo sapiens GN=GIPC1 PE=1 SV=2	0.0659114	8.91479e+07	9.06414e+07	1.29052e+08	6.88732e+07	7.49324e+07	8.12491e+07	121765992	2.42046e+07	1.21602e+08	0.772572	0.826691	0.629583	1.36589	0.267037	0.942268	0.742949	0.858397	-0.732808	-0.376576
O14925	TIMM23	Mitochondrial import inner membrane translocase subunit Tim23 OS=Homo sapiens GN=TIMM23 PE=1 SV=1	0.00249934	5.78759e+08	5.62865e+08	5.66458e+08	6.0967e+08	5.28509e+08	6.6695e+08	5.24569e+08	3.90924e+08	5.45858e+08	1.05341	0.938962	1.1774	0.906369	0.694525	0.963634	1.05659	0.854843	0.135766	-0.386809
O14929	HAT1	Histone acetyltransferase type B catalytic subunit OS=Homo sapiens GN=HAT1 PE=1 SV=1	0.0364258	4.56148e+08	4.24676e+08	3.47942e+08	3.45816e+08	4.68339e+08	3.57268e+08	5.17338e+08	3.28715e+08	4.58304e+08	0.758121	1.10281	1.0268	1.13414	0.774038	1.31718	0.962579	1.07512	-0.0940616	0.178645
O14936	CASK	Peripheral plasma membrane protein CASK OS=Homo sapiens GN=CASK PE=1 SV=3	0.0155654	1.50602e+08	1.42538e+08	1.79953e+08	1.20139e+08	8.64582e+07	1.45169e+08	1.56803e+08	8.73478e+07	1.79528e+08	0.797725	0.606564	0.806707	1.04118	0.612805	0.997635	0.736999	0.883874	-0.752639	-0.304444
O14949	UQCRQ	Cytochrome b-c1 complex subunit 8 OS=Homo sapiens GN=UQCRQ PE=1 SV=4	0.0101564	499445583	496993274	571394368	2.79863e+08	3.01485e+08	5.60492e+08	2.41483e+08	3.73078e+08	2.23666e+08	0.560347	0.606617	0.980919	0.483502	0.75067	0.391438	0.715961	0.54187	-0.824065	-1.51118
O14950	MYL12B	Myosin regulatory light chain 12B OS=Homo sapiens GN=MYL12B PE=1 SV=2	8.81867e-05	2275509647	2.20165e+09	2.29558e+09	1945114108	2.08409e+09	2036969285	2.17491e+09	1291920059	2.28533e+09	0.854804	0.946605	0.887343	0.955792	0.586797	0.995534	0.896251	0.846041	-0.270146	-0.412335
O14964	HGS	Hepatocyte growth factor-regulated tyrosine kinase substrate OS=Homo sapiens GN=HGS PE=1 SV=1	0.00113629	1.91901e+08	2.02223e+08	2.06313e+08	2.24669e+08	2.27618e+08	2.37777e+08	2.01908e+08	1.65337e+08	2.24486e+08	1.17075	1.12558	1.15251	1.05215	0.817599	1.08809	1.14961	0.985944	0.343867	-0.0349135
O14965	AURKA	Serine/threonine-protein kinase 6 OS=Homo sapiens GN=AURKA PE=1 SV=2	0.128512	5.67906e+08	171695118	1.77211e+08	6.41113e+07	1.11217e+08	8.29858e+07	1.46197e+08	1.08607e+08	161972510	0.112891	0.647761	0.468287	0.257433	0.63256	0.914008	0.409646	0.601333	-2.20108	-1.25438
O14967	CLGN	Calmegin OS=Homo sapiens GN=CLGN PE=1 SV=1	0.00676815	2.50292e+08	2.60579e+08	3.04575e+08	2.20373e+08	1.90607e+08	2.67129e+08	1.77938e+08	1.10698e+08	1.95174e+08	0.880464	0.731476	0.877053	0.710921	0.424814	0.640807	0.829664	0.59218	-0.460543	-1.2922
O14974	PPP1R12A	Protein phosphatase 1 regulatory subunit 12A OS=Homo sapiens GN=PPP1R12A PE=1 SV=1	0.303821	6.97724e+07	64101363	4.06332e+07	93362682	4.09205e+07	6.95073e+07	80465675	4.34655e+07	5.43027e+07	1.3381	0.638372	1.71061	1.15326	0.678075	1.33641	1.22903	1.05592	0.508608	0.134188
O14975	SLC27A2	Very long-chain acyl-CoA synthetase OS=Homo sapiens GN=SLC27A2 PE=1 SV=1	0.166555	9.36116e+07	8.92035e+07	8.85621e+07	6.49207e+07	6.42584e+07	9.32041e+07	7.47015e+07	3.43054e+07	9.72865e+07	0.693511	0.720357	1.05241	0.797994	0.384575	1.09851	0.822094	0.76036	-0.483149	-0.675677
O14976	GAK	Cyclin-G-associated kinase OS=Homo sapiens GN=GAK PE=1 SV=2	0.224728	5.56204e+07	5.93432e+07	6.89138e+07	6.57112e+07	5.25325e+07	8.64095e+08	4.9365e+07	4.22761e+07	6.20598e+07	1.18142	0.885232	12.5388	0.887533	0.7124	0.900543	4.86848	0.833492	3.90362	-0.449191
O14979	HNRNPDL	Heterogeneous nuclear ribonucleoprotein D-like OS=Homo sapiens GN=HNRPDL PE=1 SV=3	0.00150728	3.95023e+09	3.82778e+09	4.40249e+09	4135015837	3.67078e+09	3.9992e+09	3.87919e+09	2.32387e+09	4.20552e+09	1.04678	0.958982	0.908394	0.982016	0.607106	0.95526	0.971385	0.848127	-0.0716031	-0.406261
O14980	XPO1	Exportin-1 OS=Homo sapiens GN=XPO1 PE=1 SV=1	0.0531792	4.16797e+08	4.14903e+08	527124621	5.54337e+08	4.71554e+08	5.25105e+08	4.98891e+08	3.34569e+08	5.89136e+08	1.32999	1.13654	0.996168	1.19696	0.806378	1.11764	1.15423	1.04033	0.353759	0.0975056
O14981	BTAF1	TATA-binding protein-associated factor 172 OS=Homo sapiens GN=BTAF1 PE=1 SV=2	0.0157102	1.56997e+08	1.7272e+08	2.02478e+08	1.71141e+08	1.63343e+08	189391128	1.35345e+08	1.04418e+08	151636590	1.09009	0.945708	0.935365	0.862089	0.604551	0.748903	0.990388	0.738514	-0.0238213	-0.747573
O15027	SEC16A	Protein transport protein Sec16A OS=Homo sapiens GN=SEC16A PE=1 SV=3	0.00584367	2.00468e+08	2.37223e+08	2.95026e+08	6.95247e+07	1.07037e+08	6.68251e+07	2.68403e+08	3.35384e+07	1.6493e+08	0.346811	0.451206	0.226506	1.33888	0.141379	0.559034	0.341508	0.679765	-2.64976	-0.952014
O15031	PLXNB2	Plexin-B2 OS=Homo sapiens GN=PLXNB2 PE=1 SV=3	0.000714039	2.70171e+08	2.62485e+08	2.78183e+08	2.03549e+08	2.11998e+08	2.21116e+08	2.65503e+08	1.68589e+08	2.60055e+08	0.753407	0.807659	0.794857	0.98272	0.64228	0.934833	0.785308	0.853278	-0.596055	-0.391329
O15042	U2SURP	U2-associated protein SR140 OS=Homo sapiens GN=SR140 PE=1 SV=2	0.0176751	6.68582e+08	5.49014e+08	5.65287e+08	5.57692e+08	5.14729e+08	657851854	6.13004e+08	4.53612e+08	5.60673e+08	0.834143	0.93755	1.16375	0.916873	0.82623	0.991837	0.97848	0.911647	-0.0536533	-0.22814
O15067	PFAS	Phosphoribosylformylglycinamidine synthase OS=Homo sapiens GN=PFAS PE=1 SV=3	0.00267634	2.05772e+08	2.21918e+08	2.45911e+08	2.02168e+08	1.9164e+08	2.54425e+08	2.11713e+08	1.49502e+08	2.62215e+08	0.982485	0.863561	1.03462	1.02887	0.673678	1.0663	0.960223	0.922949	-0.100107	-0.197752
O15091	PRORP	Mitochondrial ribonuclease P protein 3 OS=Homo sapiens GN=KIAA0391 PE=1 SV=2	0.0489506	3.64026e+08	3.4354e+08	4.23853e+08	4.02423e+08	3.65567e+08	4.18309e+08	3.63169e+08	2.15196e+08	3.76453e+08	1.10548	1.06412	0.986921	0.997645	0.626409	0.888168	1.05217	0.837407	0.125429	-0.437632
O15116	LSM1	U6 snRNA-associated Sm-like protein LSm1 OS=Homo sapiens GN=LSM1 PE=1 SV=1	0.0190126	118965287	1.33565e+08	1.71222e+08	1.3304e+08	1.23438e+08	1.45129e+08	1.37967e+08	8.82478e+07	1.34791e+08	1.11831	0.92418	0.847603	1.15972	0.660712	0.787227	0.963363	0.86922	-0.0920538	-0.345674
O15118	NPC1	Niemann-Pick C1 protein OS=Homo sapiens GN=NPC1 PE=1 SV=2	0.000731162	4.41717e+08	4.97124e+08	5.80276e+08	2.27721e+08	1.87589e+08	1.64068e+08	1.12325e+09	4.91592e+07	1.18564e+08	0.515535	0.377349	0.282742	2.54292	0.0988873	0.204323	0.391875	0.94871	-2.31046	-0.129856
O15121	DEGS1	Sphingolipid delta(4)-desaturase DES1 OS=Homo sapiens GN=DEGS1 PE=1 SV=1	0.287349	6.04665e+07	1.02818e+08	8.38079e+07	7.97085e+07	9.00868e+07	1.40099e+08	1.16828e+08	7.65663e+07	1.24632e+08	1.31822	0.876177	1.67167	1.93211	0.744677	1.48711	1.28869	1.38796	0.625521	0.808548
O15126	SCAMP1	Secretory carrier-associated membrane protein 1 OS=Homo sapiens GN=SCAMP1 PE=1 SV=2	0.338648	3.44964e+08	1.82855e+08	4.45517e+08	4.44726e+08	3.11496e+08	5.57037e+08	1.83496e+08	1.26364e+08	4.83233e+08	1.28919	1.70352	1.25032	0.531927	0.691063	1.08466	1.41434	0.769216	0.854981	-0.647118
O15127	SCAMP2	Secretory carrier-associated membrane protein 2 OS=Homo sapiens GN=SCAMP2 PE=1 SV=2	0.0141632	3.13906e+08	5.40135e+08	610070546	503221047	5.61693e+08	5.45514e+08	3.74332e+08	3.72922e+08	7.15967e+08	1.60309	1.03991	0.894181	1.1925	0.690424	1.17358	1.17906	1.01883	0.406247	0.046018
O15143	ARPC1B	Actin-related protein 2/3 complex subunit 1B OS=Homo sapiens GN=ARPC1B PE=1 SV=3	1.79291e-05	7.43795e+08	7.55685e+08	7.48633e+08	6.29675e+08	4.65993e+08	6.20057e+08	7.22138e+08	4.75169e+08	6.0989e+08	0.84657	0.61665	0.828253	0.970883	0.628793	0.814671	0.763824	0.804782	-0.664465	-0.535641
O15144	ARPC2	Actin-related protein 2/3 complex subunit 2 OS=Homo sapiens GN=ARPC2 PE=1 SV=1	0.00213809	1.08951e+09	1.07453e+09	1.23336e+09	9.43037e+08	9.27069e+08	888141610	1029988923	5.63606e+08	1.08507e+09	0.865563	0.862763	0.720097	0.945372	0.524512	0.879765	0.816141	0.783216	-0.501074	-0.602632
O15145	ARPC3	Actin-related protein 2/3 complex subunit 3 OS=Homo sapiens GN=ARPC3 PE=1 SV=3	0.00455658	6.68292e+08	6.9963e+08	5.5916e+08	7.30578e+08	425668023	7.22361e+08	6.76843e+08	5.19918e+08	7.09495e+08	1.0932	0.608419	1.29187	1.0128	0.743134	1.26886	0.997829	1.00826	-0.00535953	0.0202954
O15155	BET1	BET1 homolog OS=Homo sapiens GN=BET1 PE=1 SV=1	0.072276	2.88175e+08	2.69173e+08	374170254	395375338	2.80939e+08	2.80574e+08	2.66521e+08	240936998	2.14311e+08	1.372	1.04371	0.749858	0.924859	0.895101	0.572762	1.05519	0.797574	0.132487	-0.55783
O15160	POLR1C	DNA-directed RNA polymerases I and III subunit RPAC1 OS=Homo sapiens GN=POLR1C PE=1 SV=1	0.00127145	5.06031e+08	4.54146e+08	4.96324e+08	4.88618e+08	4.58328e+08	4.99959e+08	4.52368e+08	2.83718e+08	4.6704e+08	0.96559	1.00921	1.00732	0.893953	0.624729	0.940998	0.99404	0.819893	-0.0147423	-0.489762
O15164	TRIM24	Transcription intermediary factor 1-alpha OS=Homo sapiens GN=TRIM24 PE=1 SV=3	0.0140414	1.47621e+08	1.22676e+08	1.21669e+08	9.09216e+07	9.42877e+07	1.01482e+08	1.03977e+08	6.72144e+07	9.55396e+07	0.615914	0.768589	0.834083	0.704352	0.5479	0.785241	0.739529	0.679164	-0.744188	-0.954194
O15173	PGRMC2	Membrane-associated progesterone receptor component 2 OS=Homo sapiens GN=PGRMC2 PE=1 SV=1	0.0241833	1.22875e+09	1.197e+09	1.34355e+09	1.1651e+09	1161356974	1.23437e+09	1.23697e+09	5.88732e+08	1.24998e+09	0.948197	0.97022	0.918743	1.00668	0.491838	0.930357	0.94572	0.809626	-0.137642	-0.52084
O15212	PFDN6	Prefoldin subunit 6 OS=Homo sapiens GN=PFDN6 PE=1 SV=1	0.0107977	2.42579e+08	2.16943e+08	2.66385e+08	161777633	1.75137e+08	2.4071e+08	2.36004e+08	1.69885e+08	2.35516e+08	0.666906	0.807294	0.903617	0.972895	0.783083	0.884119	0.792605	0.880032	-0.573242	-0.315185
O15213	WDR46	WD repeat-containing protein 46 OS=Homo sapiens GN=WDR46 PE=1 SV=2	0.0176578	5.15729e+08	5.06642e+08	5.74558e+08	4.89879e+08	4.63902e+08	5.00237e+08	4.78747e+08	2.4525e+08	5.19552e+08	0.949878	0.915641	0.870646	0.928292	0.48407	0.904263	0.912055	0.772208	-0.227035	-0.637542
O15226	NKRF	NF-kappa-B-repressing factor OS=Homo sapiens GN=NKRF PE=1 SV=2	0.0463531	3.7484e+08	6.73423e+07	3.80097e+08	2.09297e+08	3.72192e+08	3.6888e+08	6.19791e+07	3.00037e+08	4.08621e+08	0.558363	5.52686	0.970488	0.165348	4.45539	1.07504	2.3519	1.8986	2.10924	1.58118
O15228	GNPAT	Dihydroxyacetone phosphate acyltransferase OS=Homo sapiens GN=GNPAT PE=1 SV=1	0.163773	6.46537e+07	5.01485e+07	6.57699e+07	7.04807e+07	4.49285e+07	4.99882e+07	5.05292e+07	6.47057e+07	106251032	1.09013	0.895909	0.760046	0.781537	1.29028	1.6155	0.915361	1.2291	-0.218113	0.508763
O15230	LAMA5	Laminin subunit alpha-5 OS=Homo sapiens GN=LAMA5 PE=1 SV=7	0.127095	8.21978e+07	1.00326e+08	1.46516e+08	1.0594e+08	1.07881e+08	1.35423e+08	1.04838e+08	7.09076e+07	1.23287e+08	1.28884	1.0753	0.924288	1.27543	0.70677	0.841455	1.09614	0.941219	0.226404	-0.149408
O15254	ACOX3	Peroxisomal acyl-coenzyme A oxidase 3 OS=Homo sapiens GN=ACOX3 PE=1 SV=2	0.0961757	1.75295e+08	1.86976e+08	1.48366e+08	1.64091e+08	1.48957e+08	1.65318e+08	1.54427e+08	9.50335e+07	1.36704e+08	0.936083	0.79666	1.11426	0.880953	0.508265	0.921395	0.948999	0.770204	-0.129104	-0.64395
O15258	RER1	Protein RER1 OS=Homo sapiens GN=RER1 PE=1 SV=1	0.000715888	1.26088e+09	1.25299e+09	1.37282e+09	1.10556e+09	1246548754	1.31537e+09	8.99359e+08	7.2019e+08	1.09391e+09	0.876816	0.994856	0.95815	0.713277	0.574776	0.796834	0.943274	0.694962	-0.144028	-0.897482
O15260	SURF4	Surfeit locus protein 4 OS=Homo sapiens GN=SURF4 PE=1 SV=3	0.00716352	2.93881e+09	2.76838e+09	3.03911e+09	3.0177e+09	2.70409e+09	2.78849e+09	2.75716e+09	1.5505e+09	2.78303e+09	1.02684	0.976778	0.917534	0.938188	0.560074	0.915739	0.973719	0.804667	-0.0656848	-0.535993
O15269	SPTLC1	Serine palmitoyltransferase 1 OS=Homo sapiens GN=SPTLC1 PE=1 SV=1	0.100795	436115450	4.48834e+08	5.89723e+08	5.49972e+08	5.28511e+08	5.42735e+08	479528349	3.165e+08	5.14346e+08	1.26107	1.17752	0.920321	1.09954	0.70516	0.872182	1.11964	0.892296	0.278703	-0.281054
O15270	SPTLC2	Serine palmitoyltransferase 2 OS=Homo sapiens GN=SPTLC2 PE=1 SV=1	0.0332284	9.19959e+07	1.33669e+08	1.0628e+08	7.24028e+07	74245373	6.56795e+07	8.04549e+07	1.9193e+07	6.94799e+07	0.787022	0.555442	0.617985	0.874549	0.143586	0.653744	0.653483	0.557293	-1.04926	-1.44196
O15294	OGT	UDP-N-acetylglucosamine--peptide N-acetylglucosaminyltransferase 110 kDa subunit OS=Homo sapiens GN=OGT PE=1 SV=3	0.0856666	2.89841e+07	2.79581e+07	5.43167e+07	1.49362e+07	143385701	1.33125e+07	2.74585e+07	3.96774e+06	2.31888e+07	0.515323	5.12859	0.24509	0.947366	0.141917	0.426918	1.963	0.5054	1.66346	-1.68302
O15305	PMM2	Phosphomannomutase 2 OS=Homo sapiens GN=PMM2 PE=1 SV=1	0.000808444	3.05339e+08	3.11818e+08	3.58971e+08	2.78586e+08	284528912	2.79852e+08	2.90768e+08	1.9234e+08	2.84977e+08	0.912385	0.912483	0.779595	0.952282	0.616834	0.793871	0.868154	0.787662	-0.3487	-0.588671
O15320	MIA2	Cutaneous T-cell lymphoma-associated antigen 5 OS=Homo sapiens GN=CTAGE5 PE=1 SV=3	0.00312411	2.40337e+08	2.34605e+08	2.71947e+08	1.72987e+08	1.74262e+08	1.58939e+08	1.83094e+08	1.08306e+08	1.87228e+08	0.71977	0.742791	0.584446	0.761824	0.461654	0.68847	0.682335	0.637316	-0.942705	-1.11104
O15321	TM9SF1	Transmembrane 9 superfamily member 1 OS=Homo sapiens GN=TM9SF1 PE=2 SV=2	0.268091	3.75513e+07	1.6224e+08	3.64633e+08	9.11439e+07	7.95471e+07	121167646	1.89925e+08	2.03793e+08	204518085	2.42718	0.490306	0.332301	5.05775	1.25613	0.560888	1.08326	2.29159	0.197251	2.04517
O15347	HMGB3	High mobility group protein B3 OS=Homo sapiens GN=HMGB3 PE=1 SV=4	0.0150708	1.44501e+09	1.37604e+09	1.55329e+09	1.37005e+09	1269776957	1271508614	1.15651e+09	8.54686e+08	1199805160	0.948124	0.922774	0.818592	0.800345	0.621119	0.77243	0.896497	0.731298	-0.269469	-0.771791
O15355	PPM1G	Protein phosphatase 1G OS=Homo sapiens GN=PPM1G PE=1 SV=1	0.000398792	5.59079e+08	5.8314e+08	6.05196e+08	5.62761e+08	6.05543e+08	5.02925e+08	7.15634e+08	4.60271e+08	6.84705e+08	1.00659	1.03842	0.831012	1.28002	0.789298	1.13138	0.958672	1.0669	-0.104094	0.15971
O15371	EIF3D	Eukaryotic translation initiation factor 3 subunit D OS=Homo sapiens GN=EIF3D PE=1 SV=1	0.0130775	4.64831e+08	3.90323e+08	3.27501e+08	5.8771e+08	570024714	5.50327e+08	1.3251e+09	3.6909e+08	5.75371e+08	1.26435	1.46039	1.68038	2.85071	0.945602	1.75685	1.46837	1.85105	0.947446	1.51864
O15372	EIF3H	Eukaryotic translation initiation factor 3 subunit H OS=Homo sapiens GN=EIF3H PE=1 SV=1	0.0222821	2.47937e+08	2.45798e+08	2.61896e+08	3.21287e+08	2.87367e+08	2.66649e+08	3.2647e+08	1.71769e+08	3.56603e+08	1.29584	1.16912	1.01815	1.31674	0.698822	1.36162	1.16104	1.12573	0.36825	0.292085
O15381	NVL	Nuclear valosin-containing protein-like OS=Homo sapiens GN=NVL PE=1 SV=1	0.0692549	7.03911e+07	5.46447e+07	9.03375e+07	7.91574e+07	7.57438e+07	3.96232e+07	5.94446e+07	5.13086e+07	50033698	1.12454	1.38612	0.438613	0.84449	0.938949	0.553853	0.983089	0.779098	-0.042065	-0.615636
O15397	IPO8	Importin-8 OS=Homo sapiens GN=IPO8 PE=1 SV=2	0.248163	2.21377e+07	2.62002e+07	3.21584e+07	2.96081e+07	2.14593e+07	3.09721e+07	2.67949e+07	7.22128e+06	2.03376e+07	1.33746	0.819053	0.963111	1.21038	0.27562	0.632419	1.03987	0.706138	0.09643	-0.858136
[truncated: 3,795 more rows]

## Sheet: GO BP analysis
ID	Description	GeneRatio	BgRatio	pvalue	p.adjust	qvalue	geneID	Count
[truncated: 3,842 more rows]

## Sheet: GO CC analysis
ID	Description	GeneRatio	BgRatio	pvalue	p.adjust	qvalue	geneID	Count
[truncated: 538 more rows]

[truncated: 1 more sheets: GO MF analysis]
